# Supplementary material for: A composite metric for assessing data on mortality and causes of death: the vital statistics performance index
Source: PubMed Central journal article supplement (PMC4060759; doi:10.1186/1478-7954-12-14), 2014-05-14
Supplement: 1478-7954-12-14-S1.pdf [file 1478-7954-12-14-S1.pdf]

Appendix Table 1. Country-years with data available.

| Country                               | Years                                                              |
|---------------------------------------|--------------------------------------------------------------------|
| Afghanistan                           | None Available                                                     |
| Albania                               | 1987-2010                                                          |
| Algeria                               | 1980-1982, 1985-1987, 1990, 1992, 1997-1998, 2000, 2003, 2005-2011 |
| Andorra                               | 1992, 1994, 2003-2005, 2007-2010                                   |
| Angola                                | None Available                                                     |
| Antigua and Barbuda                   | 1980, 1983, 1985-2009                                              |
| Argentina                             | 1980-2011                                                          |
| Armenia                               | 1981-2012                                                          |
| Australia                             | 1980-2011                                                          |
| Austria                               | 1980-2011                                                          |
| Azerbaijan                            | 1981-2010                                                          |
| Bahamas                               | 1980-2008                                                          |
| Bahrain                               | 1980-1982, 1984-1993, 1995-2009, 2012                              |
| Bangladesh                            | 1996                                                               |
| Barbados                              | 1980-1995, 2000-2008                                               |
| Belarus                               | 1980-2011                                                          |
| Belgium                               | 1980-2010                                                          |
| Belize                                | 1980-2009                                                          |
| Benin                                 | 1996-2000                                                          |
| Bermuda                               | 1980-2009, 2011                                                    |
| Bhutan                                | 2000-2009                                                          |
| Bolivia                               | 1988, 2000-2003, 2006                                              |
| Bosnia and Herzegovina                | 1981, 1985-1991, 1998-2011                                         |
| Botswana                              | 2005-2008                                                          |
| Brazil                                | 1980-2011                                                          |
| Brunei Darussalam                     | 1981-1992, 1995-2011                                               |
| Bulgaria                              | 1980-2012                                                          |
| Burkina Faso                          | None Available                                                     |
| Burundi                               | None Available                                                     |
| Cambodia                              | None Available                                                     |
| Cameroon                              | None Available                                                     |
| Canada                                | 1980-2011                                                          |
| Cape Verde                            | 1980, 1983-1985, 1990-1991, 1995-2000                              |
| Central African Republic              | None Available                                                     |
| Chad                                  | None Available                                                     |
| Chile                                 | 1980-2011                                                          |
| China                                 | 1991-2002, 2004-2012                                               |
| Colombia                              | 1980-2009, 2011                                                    |
| Comoros                               | None Available                                                     |
| Congo                                 | None Available                                                     |
| Congo, the Democratic Republic of the | None Available                                                     |
| Costa Rica                            | 1980-2011                                                          |
| Cote d'Ivoire                         | None Available                                                     |
| Croatia                               | 1985-2012                                                          |
| Cuba                                  | 1980-2010                                                          |
| Cyprus                                | 1980-2011                                                          |
| Czech Republic                        | 1980-2012                                                          |
| Denmark                               | 1980-2011                                                          |
| Djibouti                              | None Available                                                     |
| Dominica                              | 1980-2010                                                          |
| Dominican Republic                    | 1980-1992, 1994-2001, 2003-2010                                    |
| Ecuador                               | 1980-2010                                                          |
| Egypt                                 | 1980-1981, 1983-2011                                               |
| El Salvador                           | 1980-2009, 2011                                                    |
| Equatorial Guinea                     | None Available                                                     |
| Eritrea                               | None Available                                                     |
| Estonia                               | 1980-2012                                                          |
| Ethiopia                              | None Available                                                     |

|                                                  |                                                                     |
|--------------------------------------------------|---------------------------------------------------------------------|
| Fiji                                             | 1980-1987, 1991, 1996-2004, 2009-2011                               |
| Finland                                          | 1980-2011                                                           |
| France                                           | 1980-2011                                                           |
| Gabon                                            | 2001-2006                                                           |
| Gambia                                           | None Available                                                      |
| Georgia                                          | 1981-2010, 2012                                                     |
| Germany                                          | 1980-2012                                                           |
| Ghana                                            | 2000-2007                                                           |
| Greece                                           | 1980-2011                                                           |
| Grenada                                          | 1980, 1984-1986, 1988-2010                                          |
| Guatemala                                        | 1980-1981, 1983-2009, 2011                                          |
| Guinea                                           | None Available                                                      |
| Guinea-Bissau                                    | None Available                                                      |
| Guyana                                           | 1980, 1984-1985, 1988-1999, 2001-2009                               |
| Haiti                                            | 1980-1981, 1987, 1992, 1999, 2002-2004                              |
| Honduras                                         | 1980-1983, 1987-1990, 1994                                          |
| Hong Kong Special Administrative Region of China | 1980-2011                                                           |
| Hungary                                          | 1980-2012                                                           |
| Iceland                                          | 1980-2011                                                           |
| India                                            | 1980-1983, 1986-2006, 2008-2010                                     |
| Indonesia                                        | None Available                                                      |
| Iran                                             | 1980-1988, 1990-1993, 1995-2010                                     |
| Iraq                                             | 1987-1989, 2008                                                     |
| Ireland                                          | 1980-2010                                                           |
| Israel                                           | 1980-2012                                                           |
| Italy                                            | 1980-2010                                                           |
| Jamaica                                          | 1980-1991, 1996, 1999-2006                                          |
| Japan                                            | 1980-2011                                                           |
| Jordan                                           | 1980, 1986, 1991, 1999, 2004-2006, 2008-2010                        |
| Kazakhstan                                       | 1981-1982, 1984-2010                                                |
| Kenya                                            | 2005                                                                |
| Kiribati                                         | 1990-2002, 2005                                                     |
| Kuwait                                           | 1980-1989, 1991-2011                                                |
| Kyrgyzstan                                       | 1981-2011                                                           |
| Laos                                             | None Available                                                      |
| Latvia                                           | 1980-2012                                                           |
| Lebanon                                          | None Available                                                      |
| Lesotho                                          | None Available                                                      |
| Liberia                                          | None Available                                                      |
| Libya                                            | 1981, 1989, 1995-1996, 2000, 2002, 2006-2008                        |
| Lithuania                                        | 1980-2012                                                           |
| Luxembourg                                       | 1980-2011                                                           |
| Macao Special Administrative Region of China     | 1981-1982, 1984, 1986-2010                                          |
| Macedonia, FYR                                   | 1982, 1989-2011                                                     |
| Madagascar                                       | 1984-1995                                                           |
| Malawi                                           | 2007                                                                |
| Malaysia                                         | 1980-1982, 1984-1986, 1990-2009                                     |
| Maldives                                         | 1980-2011                                                           |
| Mali                                             | 1981, 1984-1994                                                     |
| Malta                                            | 1980-2011                                                           |
| Marshall Islands                                 | 1986-1997, 2005-2006                                                |
| Mauritania                                       | None Available                                                      |
| Mauritius                                        | 1980-2011                                                           |
| Mexico                                           | 1980-2012                                                           |
| Micronesia, Federated States of                  | 2003                                                                |
| Moldova                                          | 1981-1982, 1984-2012                                                |
| Mongolia                                         | 1980, 1984-1985, 1987-1990, 1994-2010                               |
| Montenegro                                       | 1992, 1995-2009, 2011                                               |
| Morocco                                          | 1982, 1988-1991, 1993, 1995-1997, 1999, 2001, 2005, 2007-2008, 2011 |
| Mozambique                                       | 2003                                                                |
| Myanmar                                          | 2005                                                                |

|                                  |                                             |
|----------------------------------|---------------------------------------------|
| Namibia                          | None Available                              |
| Nepal                            | None Available                              |
| Netherlands                      | 1980-2011                                   |
| New Zealand                      | 1980-2011                                   |
| Nicaragua                        | 1984, 1987-1994, 1996-2011                  |
| Niger                            | None Available                              |
| Nigeria                          | 2004-2007                                   |
| North Korea                      | None Available                              |
| Norway                           | 1980-2012                                   |
| Occupied Palestinian Territory   | 1997-2009                                   |
| Oman                             | 2001, 2003-2007, 2009-2010                  |
| Pakistan                         | 2009                                        |
| Panama                           | 1980-2010                                   |
| Papua New Guinea                 | 1980, 1985-1990                             |
| Paraguay                         | 1980-1992, 1994-2010                        |
| Peru                             | 1980-2010                                   |
| Philippines                      | 1980-2005, 2008-2009                        |
| Poland                           | 1980-2011                                   |
| Portugal                         | 1980-2011                                   |
| Puerto Rico                      | 1980-2003, 2005-2010                        |
| Qatar                            | 1981-1997, 1999-2011                        |
| Romania                          | 1980-2011                                   |
| Russia                           | 1980-2012                                   |
| Rwanda                           | None Available                              |
| Saint Lucia                      | 1980-2006, 2008                             |
| Saint Vincent and the Grenadines | 1980, 1982-1988, 1990, 1992, 1995-2010      |
| Samoa                            | 1980-1981                                   |
| Sao Tome and Principe            | 1980, 1984-1987, 1991                       |
| Saudi Arabia                     | 1998-2012                                   |
| Senegal                          | None Available                              |
| Serbia                           | 1995-2012                                   |
| Seychelles                       | 1980-1996, 1998-2012                        |
| Sierra Leone                     | None Available                              |
| Singapore                        | 1980-2011                                   |
| Slovakia                         | 1980-2011                                   |
| Slovenia                         | 1982-2011                                   |
| Solomon Islands                  | None Available                              |
| Somalia                          | None Available                              |
| South Africa                     | 1980-1982, 1985, 1990, 1993-2012            |
| South Korea                      | 1980-2011                                   |
| Spain                            | 1980-2011                                   |
| Sri Lanka                        | 1980-1989, 1991-2007                        |
| Sudan                            | None Available                              |
| Suriname                         | 1980-1982, 1984-2009                        |
| Swaziland                        | None Available                              |
| Sweden                           | 1980-2011                                   |
| Switzerland                      | 1980-2011                                   |
| Syria                            | 1980, 1982-1985, 1987, 2005-2007            |
| Taiwan                           | 1980-2012                                   |
| Tajikistan                       | 1981-1982, 1984-2005, 2007-2008, 2011       |
| Tanzania                         | 2010                                        |
| Thailand                         | 1980-2000, 2002-2009                        |
| Timor-Leste                      | None Available                              |
| Togo                             | None Available                              |
| Tonga                            | 1981-1983, 1990, 2001, 2003-2004            |
| Trinidad and Tobago              | 1980-2008                                   |
| Tunisia                          | 1980, 1984, 1987-1989, 1993-1995, 1998-1999 |
| Turkey                           | 1980-1985, 1987-2012                        |
| Turkmenistan                     | 1981-1982, 1984-2006                        |
| Uganda                           | None Available                              |
| Ukraine                          | 1980-2012                                   |

|                      |                             |
|----------------------|-----------------------------|
| United Arab Emirates | 1985, 1990, 1995, 2000-2004 |
| United Kingdom       | 1980-2012                   |
| United States        | 1980-2011                   |
| Uruguay              | 1980-2004, 2007-2009        |
| Uzbekistan           | 1981-1982, 1984-2006        |
| Vanuatu              | None Available              |
| Venezuela            | 1980-2011                   |
| Vietnam              | None Available              |
| Yemen                | None Available              |
| Zambia               | None Available              |
| Zimbabwe             | 1987, 1989-1990, 1995-2007  |

Appendix Table 2. Categorization of Garbage Codes.

|                          | Type 1<br>No Inherent Information about the<br>Underlying Cause of Death                                                                                                                                                                                                                                                                                                                                                                                                                                                                                                                                                                                                                                                                                                                                                                                                                                                                                                                                                                                                                                                                                                                                                                                                                                                                                                                                                                                                                                                                                                                                                                                                                                                                                                                                                                                                                                                                                                                                                                                                                                                                                                                                                                                                                                                                                                                                                                                                                                                                                                                                                                                                                                                                                                                                                                                                                                                                                                                                                                                                                                                                                                                                                                               | Type 2<br>Informative about the Underlying Cause of Death<br>but Sub-Optimal                                                                                                                                                                                                                                                                                                                                                                                                                                                                                                                                                                                                                                                                                                                                                                                                                                                                                                                                                                                                                                                                                                                                                                                                                                                                                                                                                                                                                                                                                                                                                                                                                                                                                                                                                                                                                                                                                                                                                                                                                                                                                                                                                                                                                                                                                                                                                                                                                                                                                                                                                                                                                                                                                                                                                                                                                                                                                                                                                                                                                                                                                                                                                                                 |
|--------------------------|--------------------------------------------------------------------------------------------------------------------------------------------------------------------------------------------------------------------------------------------------------------------------------------------------------------------------------------------------------------------------------------------------------------------------------------------------------------------------------------------------------------------------------------------------------------------------------------------------------------------------------------------------------------------------------------------------------------------------------------------------------------------------------------------------------------------------------------------------------------------------------------------------------------------------------------------------------------------------------------------------------------------------------------------------------------------------------------------------------------------------------------------------------------------------------------------------------------------------------------------------------------------------------------------------------------------------------------------------------------------------------------------------------------------------------------------------------------------------------------------------------------------------------------------------------------------------------------------------------------------------------------------------------------------------------------------------------------------------------------------------------------------------------------------------------------------------------------------------------------------------------------------------------------------------------------------------------------------------------------------------------------------------------------------------------------------------------------------------------------------------------------------------------------------------------------------------------------------------------------------------------------------------------------------------------------------------------------------------------------------------------------------------------------------------------------------------------------------------------------------------------------------------------------------------------------------------------------------------------------------------------------------------------------------------------------------------------------------------------------------------------------------------------------------------------------------------------------------------------------------------------------------------------------------------------------------------------------------------------------------------------------------------------------------------------------------------------------------------------------------------------------------------------------------------------------------------------------------------------------------------------|--------------------------------------------------------------------------------------------------------------------------------------------------------------------------------------------------------------------------------------------------------------------------------------------------------------------------------------------------------------------------------------------------------------------------------------------------------------------------------------------------------------------------------------------------------------------------------------------------------------------------------------------------------------------------------------------------------------------------------------------------------------------------------------------------------------------------------------------------------------------------------------------------------------------------------------------------------------------------------------------------------------------------------------------------------------------------------------------------------------------------------------------------------------------------------------------------------------------------------------------------------------------------------------------------------------------------------------------------------------------------------------------------------------------------------------------------------------------------------------------------------------------------------------------------------------------------------------------------------------------------------------------------------------------------------------------------------------------------------------------------------------------------------------------------------------------------------------------------------------------------------------------------------------------------------------------------------------------------------------------------------------------------------------------------------------------------------------------------------------------------------------------------------------------------------------------------------------------------------------------------------------------------------------------------------------------------------------------------------------------------------------------------------------------------------------------------------------------------------------------------------------------------------------------------------------------------------------------------------------------------------------------------------------------------------------------------------------------------------------------------------------------------------------------------------------------------------------------------------------------------------------------------------------------------------------------------------------------------------------------------------------------------------------------------------------------------------------------------------------------------------------------------------------------------------------------------------------------------------------------------------------|
| ICD10 Codes<br>(3-digit) | <p>A59, A71, A74*, B07, B08, B09, B30, B35, B36, B85, B87, B88, E50, E64*, F09, F17, F30, F31, F32, F33, F34, F35, F36, F37, F38, F39, F40, F41, F42, F43, F44, F45, F46, F47, F48, F49, F51, F52, F53, F54, F55, F56, F57, F58, F59, F60, F61, F62, F63, F64, F65, F66, F67, F68, F69, F70, F71, F72, F73, F74, F75, F76, F77, F78, F79, F80, F81, F82, F83, F84, F85, F86, F87, F88, F89, F90, F91, F92, F93, F94, F95, F96, F97, F98, F99, G15, G16, G17, G18, G19, G27, G28, G29, G32, G33, G34, G38, G39, G42, G43, G44, G47*, G48, G49, G50, G51, G52, G53, G54, G55, G56, G57, G58, G59, G60, G62, G63, G64, G65, G66, G67, G68, G69, G74, G75, G76, G77, G78, G79, G84, G85, G86, G87, G88, G89, H00, H01, H02, H03, H04, H05*, H06, H07, H08, H09, H10, H11, H12, H13, H14, H15, H16, H17, H18, H19, H20, H21, H22, H23, H24, H25, H27, H28, H29, H30, H31, H32, H33, H34, H35, H36, H37, H38, H39, H40, H41, H42, H43, H44, H45, H46, H47, H48, H49, H50, H51, H52, H53, H54, H55, H56, H57, H58, H59, H60, H61, H62, H65, H66, H67, H68, H69, H71, H72, H73, H74, H75, H76, H77, H78, H79, H80, H81, H82, H83, H84, H85, H86, H87, H88, H89, H90, H91, H92, H93, H94, H95, H96, H97, H98, H99, K00, K01, K02, K03, K04, K05, K06, K07, K08, K09, K10, K11, K12, K13, K14, K15, K16, K17, K18, K19, K30, K31*, L20, L21, L22, L23, L24, L25, L26, L27, L28, L29, L30, L40, L41, L42, L43, L44, L45, L49, L50, L52, L53, L54, L55, L56, L57, L58, L59, L60, L62, L63, L64, L65, L66, L67, L68, L70, L71, L72, L73, L74, L75, L76, L77, L78, L79, L80, L81, L82, L83, L84, L85, L86, L87, L90, L91, L92, L94, L95, L98*, L99, M04, M10, M11, M13, M14, M15, M16, M17, M18, M22, M23, M24, M25, M26, M27, M28, M29, M37, M38, M39, M43*, M44, M45, M46, M47, M48, M49*, M50, M51, M52, M53, M54, M55, M56, M57, M58, M59, M60, M61, M62, M63, M64, M65*, M66, M67, M68, M69, M70, M71*, M72, M73*, M74, M75, M76, M77, M78, M79, M80, M81, M82, M83, M84, M85, M89*, M90, M91, M92, M93, M94, M95, M96, M97, M98, M99, N09, N24, N32*, N33, N35, N37, N38, N40, N42, N43, N46, N47, N48, N52, N53, N54, N55, N56, N57, N58, N59, N60, N61, N62, N63, N64, N66, N67, N68, N69, N78, N79, N85, N86, N88, N89, N90, N91, N95, N97, Q08, Q09, Q10*, Q19, Q29, Q36, Q46, Q47, Q48, Q49, Q88, Q94, R07, R08, R09, R12, R14, R15, R19*, R20, R21, R22, R23, R24, R25, R26, R27, R28, R29, R30, R32, R33, R34, R35, R36, R37, R38, R39, R41, R42, R43, R44, R45, R46, R47, R48, R49, R51, R52, R53, R55, R57, R58, R59, R60, R61, R62, R63, R64, R65, R66, R67, R68, R69, R70, R71, R72, R74, R75, R76, R77, R78*, R79, R80, R81, R82, R83, R84, R85, R86, R87, R88, R89, R90, R91, R92, R93, R94, R95, R96, R97, R98, R99, U04, Z00, Z01, Z02, Z03, Z04, Z05, Z06, Z07, Z08, Z09, Z10, Z11, Z12, Z13, Z14, Z15, Z16, Z17, Z18, Z19, Z20, Z21, Z22, Z23, Z24, Z25, Z26, Z27, Z28, Z29, Z30, Z31, Z32, Z33, Z34, Z35, Z36, Z37, Z38, Z39, Z40, Z41, Z42, Z43, Z44, Z45, Z46, Z47, Z48, Z49, Z50, Z51, Z52, Z53, Z54, Z55, Z56, Z57, Z58, Z59, Z60, Z61, Z62, Z63, Z64, Z65, Z66, Z67, Z68, Z69, Z70, Z71, Z72, Z73, Z74, Z75, Z76, Z77, Z78, Z79, Z80, Z81, Z82, Z83, Z84, Z85, Z86, Z87, Z88, Z89, Z90, Z91, Z92, Z93, Z94, Z95, Z96, Z97, Z98, Z99</p> | <p>A14, A29, A40, A41, A45, A47, A48*, A49*, A61, A62, A64, A72, A73, A76, A97, A99, B11, B12, B13, B14, B17*, B19*, B28, B31, B32, B34, B55*, B61, B62, B64, B82, B83*, B84, B89, B93, B94*, B95*, B96, B97, B98, B99, C14, C26, C27, C28, C29, C35, C36, C39, C42, C46, C55, C57*, C59, C63*, C68*, C75*, C76, C77, C78, C79, C80, C87, C98, C99, D00*, D01*, D02*, D07*, D08, D09*, D10*, D13*, D14*, D17, D18, D19, D20, D21, D26*, D28*, D29*, D30*, D36*, D37*, D38*, D39*, D40*, D41*, D44*, D48*, D49*, D54, D59*, D75*, D79, D84*, D85, D87, D88, D89*, D90, D91, D92, D93, D94, D95, D96, D97, D98, D99, E07*, E08, E17, E18, E19, E34*, E35, E37, E38, E39, E47, E48, E49, E62, E69, E90, E91, E92, E93, E94, E95, E96, E97, E98, E99, F06*, F07*, F08, F50*, G00*, G01, G02, G03*, G09, G91, G93*, G94, G96, G98, G99, H26, I00, I03, I04, I14, I16, I17, I18, I19, I29, I32, I43, I50, I51*, I52, I53, I54, I55, I56, I57, I58, I59, I62*, I64, I67*, I68, I69*, I79, I90, I92, I93, I94, I98*, I99, I05, J07, J08, J15*, J17, J18, J19, J22, J23, J24, J25, J26, J27, J28, J29, J48, J49, J50, J51, J52, J53, J54, J55, J56, J57, J58, J59, J64, J71, J72, J73, J74, J75, J76, J77, J78, J79, J81, J83, J85, J87, J88, J89, J90, J93, J97, J98, J99, K23, K24, K32, K33, K34, K39, K47, K48, K49, K53, K54, K63*, K69, K75*, K78, K79, K84, K87, K88, K89, K92*, K93*, K96, K97, K98, K99, L06, L07, L09, L15, L16, L17, L18, L19, L31, L32, L33, L34, L35, L36, L37, L38, L39, L46, L47, L48, L61, L69, L96, M12*, M19, M20, M21, M87*, N39*, N84*, O08, O17, O18, O19, O27, O37, O38, O39, O49, O50, O51, O52, O53, O54, O55, O56, O57, O58, O59, O78, O79, O93, O94, O95, P06, P16, P17, P18, P30, P31, P32, P33, P34, P40, P41, P42, P43, P44, P45, P46, P47, P48, P49, P62, P63, P64, P65, P66, P67, P68, P69, P73, P79, P82, P85, P86, P87, P88, P89, P96*, P97, P98, P99, Q89*, Q99*, R54, S00, S01, S02, S03, S04, S05, S06, S07, S08, S09, S10, S11, S12, S13, S14, S15, S16, S17, S18, S19, S20, S21, S22, S23, S24, S25, S26, S27, S28, S29, S30, S31, S32, S33, S34, S35, S36, S37, S38, S39, S40, S41, S42, S43, S44, S45, S46, S47, S48, S49, S50, S51, S52, S53, S54, S55, S56, S57, S58, S59, S60, S61, S62, S63, S64, S65, S66, S67, S68, S69, S70, S71, S72, S73, S74, S75, S76, S77, S78, S79, S80, S81, S82, S83, S84, S85, S86, S87, S88, S89, S90, S91, S92, S93, S94, S95, S96, S97, S98, S99, T00, T01, T02, T03, T04, T05, T06, T07, T08, T09, T10, T11, T12, T13, T14, T15, T16, T17, T18, T19, T20, T21, T22, T23, T24, T25, T26, T27, T28, T29, T30, T31, T32, T33, T34, T35, T36, T37, T38, T39, T40, T41, T42, T43, T44, T45, T46, T47, T48, T49, T50, T51, T52, T53, T54, T55, T56, T57, T58, T59, T60, T61, T62, T63, T64, T65, T66, T67, T68, T69, T70, T71, T73, T74, T75, T76, T78, T79, T80, T81, T82, T83, T84, T85, T86, T87, T88, T90, T91, T92, T93, T94, T95, T96, T97, T98, V87*, V88*, V89, V90*, V99, W47, W48, W63, W71, W72, W82, W95, W96, W98, X07, X41, X42, X44, X55, X56, X59, Y09, Y10, Y11, Y12, Y13, Y14, Y15, Y16, Y17, Y18, Y19, Y20, Y21, Y22, Y23, Y24, Y25, Y26, Y27, Y28, Y29, Y30, Y31, Y32, Y33, Y34, Y85, Y86, Y87*, Y89*, Y90, Y91, Y92, Y93, Y94, Y95, Y96, Y97, Y98, Y99</p> |

\* At least one corresponding 4-digit code not classified garbage  
 Causes classified as garbage codes at the 4-digit level, but not at the corresponding 3-digit level not displayed

Appendix Table 3. Combinations of Age or Sex with Cause of Death Deemed Impossible.

| GBD Code  | Cause                          | Impossible Before Age | Impossible After Age | Impossible Amongst |
|-----------|--------------------------------|-----------------------|----------------------|--------------------|
| A.1.2.1   | HIV-TB                         | Post Neonatal         | 74                   | None               |
| A.1.2.2   | HIV (other)                    | Post Neonatal         | 74                   | None               |
| A.2.1.7   | Amoebiasis                     | Post Neonatal         | None                 | None               |
| A.2.11    | Measles                        | Post Neonatal         | 59                   | None               |
| A.2.2     | Typhoid fevers                 | Post Neonatal         | None                 | None               |
| A.2.8     | Diphtheria                     | 1                     | 59                   | None               |
| A.2.9     | Whooping cough                 | Post Neonatal         | 59                   | None               |
| A.3.11    | Dengue                         | Post Neonatal         | None                 | None               |
| A.3.13    | Rabies                         | Post Neonatal         | None                 | None               |
| A.3.14    | Intestinal nematode            | Post Neonatal         | None                 | None               |
| A.3.14.1  | Ascariasis                     | Post Neonatal         | None                 | None               |
| A.3.2     | Chagas                         | Post Neonatal         | None                 | None               |
| A.3.3     | Leishmaniasis                  | Post Neonatal         | None                 | None               |
| A.3.4     | Trypanosomiasis                | 1                     | None                 | None               |
| A.3.5     | Schistosomiasis                | Post Neonatal         | None                 | None               |
| A.3.6     | Cysticercosis                  | 5                     | None                 | None               |
| A.3.7     | Echinococcosis                 | 1                     | None                 | None               |
| A.4.1     | Maternal hemorrhage            | 15                    | 49                   | Males              |
| A.4.2     | Maternal sepsis                | 15                    | 49                   | Males              |
| A.4.3     | Maternal hypertension          | 15                    | 64                   | Males              |
| A.4.4     | Obstructed labor               | 15                    | None                 | Males              |
| A.4.5     | Abortion                       | 15                    | 49                   | Males              |
| A.4.6     | Other maternal disorders       | 15                    | 49                   | Males              |
| A.5.3     | Neonatal sepsis                | None                  | Late Neonatal        | None               |
| A.6.1     | Protein-energy malnutrition    | Late Neonatal         | None                 | None               |
| A.6.2     | Iodine deficiency              | 1                     | None                 | None               |
| A.6.5     | Other nutritional deficiencies | Post Neonatal         | None                 | None               |
| A.7.1.1   | Syphilis                       | 10                    | None                 | None               |
| A.7.1.2   | Chlamydia                      | 10                    | None                 | None               |
| A.7.1.3   | Gonorrhoea                     | 10                    | None                 | None               |
| A.7.1.5   | Other STDs                     | 10                    | None                 | None               |
| A.7.2.3   | Acute hepatitis C              | Post Neonatal         | None                 | None               |
| A.7.2.4   | Acute hepatitis E              | Post Neonatal         | None                 | None               |
| B.1.1     | Esophageal cancer              | 15                    | None                 | None               |
| B.1.10    | Colorectal cancer              | 15                    | None                 | None               |
| B.1.11    | Mouth cancer                   | 15                    | None                 | None               |
| B.1.12    | Nasopharynx cancer             | 5                     | None                 | None               |
| B.1.13    | Other pharynx cancer           | 15                    | None                 | None               |
| B.1.14    | Gallbladder cancer             | 15                    | None                 | None               |
| B.1.15    | Pancreatic cancer              | 15                    | None                 | None               |
| B.1.16    | Melanoma                       | 15                    | None                 | None               |
| B.1.17    | Non-melanoma skin cancer       | 15                    | None                 | None               |
| B.1.18    | Ovarian cancer                 | 15                    | None                 | Males              |
| B.1.19    | Testicular cancer              | 15                    | None                 | Females            |
| B.1.2     | Stomach cancer                 | 15                    | None                 | None               |
| B.1.20    | Kidney cancers                 | 1                     | None                 | None               |
| B.1.21    | Bladder cancer                 | 15                    | None                 | None               |
| B.1.22    | Brain cancer                   | 1                     | None                 | None               |
| B.1.23    | Thyroid cancer                 | 10                    | None                 | None               |
| B.1.25    | Non-Hodgkin lymphoma           | 1                     | None                 | None               |
| B.1.26    | Myeloma                        | 15                    | None                 | None               |
| B.1.27    | Leukemia                       | 1                     | None                 | None               |
| B.1.3     | Liver cancer                   | 5                     | None                 | None               |
| B.1.3.1   | Liver cancer hepatitis B       | 5                     | None                 | None               |
| B.1.3.2   | Liver cancer hepatitis C       | 5                     | None                 | None               |
| B.1.3.3   | Liver cancer alcohol           | 15                    | None                 | None               |
| B.1.3.4   | Liver cancer other             | 5                     | None                 | None               |
| B.1.4     | Larynx cancer                  | 15                    | None                 | None               |
| B.1.5     | Lung cancer                    | 15                    | None                 | None               |
| B.1.6     | Breast cancer                  | 15                    | None                 | Males              |
| B.1.7     | Cervical cancer                | 15                    | None                 | Males              |
| B.1.8     | Uterine cancer                 | 15                    | None                 | Males              |
| B.1.9     | Prostate cancer                | 15                    | None                 | Females            |
| B.10.2.12 | Decubitus ulcer                | 1                     | None                 | None               |
| B.2.1     | Rheumatic heart disease        | 1                     | None                 | None               |
| B.2.10    | Other cardio & circulatory     | 1                     | None                 | None               |
| B.2.2     | Ischemic heart disease         | 1                     | None                 | None               |
| B.2.3.1   | Ischemic stroke                | 1                     | None                 | None               |
| B.2.3.2   | Hemorrhagic stroke             | 1                     | None                 | None               |
| B.2.4     | Hypertensive heart disease     | 1                     | None                 | None               |
| B.2.5     | Cardiomyopathy                 | 1                     | None                 | None               |
| B.2.6     | Atrial fibrillation            | 1                     | None                 | None               |
| B.2.8     | Peripheral vascular disease    | 1                     | None                 | None               |
| B.3.1     | COPD                           | 1                     | None                 | None               |
| B.3.2     | Pneumoconiosis                 | 1                     | None                 | None               |
| B.3.3     | Asthma                         | 1                     | None                 | None               |
| B.3.4     | Interstitial lung diseases     | 1                     | None                 | None               |
| B.3.5     | Other respiratory diseases     | 1                     | None                 | None               |
| B.4.3     | Cirrhosis alcohol              | 15                    | None                 | None               |
| B.5.1     | Peptic ulcer                   | 1                     | None                 | None               |
| B.5.10    | Other digestive diseases       | 1                     | None                 | None               |
| B.5.2     | Gastritis & duodenitis         | 1                     | None                 | None               |
| B.5.3     | Appendicitis                   | 1                     | None                 | None               |
| B.5.5     | Inguinal & femoral hernia      | 1                     | None                 | None               |
| B.5.6     | Inflammatory bowel disease     | 1                     | None                 | None               |
| B.5.7     | Vascular intestinal disorders  | 1                     | None                 | None               |
| B.5.8     | Gall bladder diseases          | 1                     | None                 | None               |
| B.5.9     | Pancreatitis                   | 1                     | None                 | None               |

|         |                               |    |      |       |
|---------|-------------------------------|----|------|-------|
| B.6.1   | Alzheimer's disease           | 40 | None | None  |
| B.6.2   | Parkinson's disease           | 30 | None | None  |
| B.6.4   | Multiple sclerosis            | 5  | None | None  |
| B.6.7   | Other neurological disorders  | 1  | None | None  |
| B.7.1   | Schizophrenia                 | 10 | None | None  |
| B.7.11  | Other mental & behavioral     | 1  | None | None  |
| B.7.3.1 | Opioid use                    | 15 | None | None  |
| B.7.3.2 | Cocaine use                   | 15 | None | None  |
| B.7.3.3 | Amphetamine use               | 10 | None | None  |
| B.7.3.5 | Other drug use                | 10 | None | None  |
| B.7.7   | Eating disorders              | 5  | None | None  |
| B.8.4.2 | Urolithiasis                  | 1  | None | None  |
| B.8.5.1 | Fibroids                      | 15 | None | Males |
| B.8.5.4 | Endometriosis                 | 15 | 54   | Males |
| B.8.5.5 | Genital prolapse              | 15 | None | Males |
| B.8.5.7 | Other gynecological disorders | 15 | 59   | Males |
| B.9.1   | Rheumatoid arthritis          | 5  | None | None  |
| B.9.5   | Other musculoskeletal         | 10 | None | None  |
| C.1.1.2 | Bicycle road injury           | 1  | None | None  |
| C.3.1   | Self-harm                     | 10 | None | None  |

Appendix Table 4. CSMF Accuracy Transformations from Simulation.

| CSMF Accuracy (%)      |                 |                      |                                 |              |                      |
|------------------------|-----------------|----------------------|---------------------------------|--------------|----------------------|
| Value of Indicator (%) | Garbage Coding* | Age/Sex Unspecified* | Medically Impossible Diagnoses* | Completeness | Length of Cause List |
| 100                    | 100             | 100                  | 100                             | 100          | 100                  |
| 99                     | 99.3            | 99.3                 | 99.1                            | 99.2         | 99.8                 |
| 98                     | 98.7            | 98.5                 | 98.3                            | 98.4         | 99.6                 |
| 97                     | 98              | 97.8                 | 97.5                            | 97.6         | 99.3                 |
| 96                     | 97.3            | 97.1                 | 96.8                            | 97.2         | 99.1                 |
| 95                     | 96.7            | 96.4                 | 96.2                            | 96.8         | 98.9                 |
| 94                     | 96              | 95.7                 | 95.6                            | 96           | 98.7                 |
| 93                     | 95.4            | 95                   | 95.1                            | 94.8         | 98.4                 |
| 92                     | 94.7            | 94.3                 | 94.6                            | 93.6         | 98.2                 |
| 91                     | 94              | 93.6                 | 94.2                            | 92.8         | 97.9                 |
| 90                     | 93.4            | 92.9                 | 93.8                            | 92.5         | 97.7                 |
| 89                     | 92.7            | 92.2                 | 93.4                            | 92.1         | 97.5                 |
| 88                     | 92              | 91.5                 | 93.2                            | 91.3         | 97.2                 |
| 87                     | 91.3            | 90.8                 | 93                              | 90.1         | 97                   |
| 86                     | 90.7            | 90.2                 | 92.8                            | 88.9         | 96.7                 |
| 85                     | 90              | 89.5                 | 92.7                            | 88.1         | 96.5                 |
| 84                     | 89.3            | 88.8                 | 92.5                            | 87.7         | 96.2                 |
| 83                     | 88.6            | 88.1                 | 92.4                            | 87.3         | 95.9                 |
| 82                     | 87.9            | 87.4                 | 92.3                            | 86.5         | 95.7                 |
| 81                     | 87.2            | 86.7                 | 92.3                            | 85.3         | 95.4                 |
| 80                     | 86.6            | 86                   | 92.3                            | 84.1         | 95.1                 |
| 79                     | 85.9            | 85.4                 | 92.2                            | 83.3         | 94.9                 |
| 78                     | 85.2            | 84.7                 | 92.3                            | 82.8         | 94.6                 |
| 77                     | 84.5            | 84                   | 92.2                            | 82.4         | 94.3                 |
| 76                     | 83.8            | 83.3                 | 92.2                            | 81.6         | 94                   |
| 75                     | 83.1            | 82.6                 | 92.1                            | 80.4         | 93.7                 |
| 74                     | 82.4            | 81.9                 | 92.1                            | 79.1         | 93.4                 |
| 73                     | 81.7            | 81.2                 | 92.1                            | 78.3         | 93.1                 |
| 72                     | 81              | 80.5                 | 92.1                            | 77.4         | 92.8                 |
| 71                     | 80.3            | 79.8                 | 92.1                            | 77           | 92.5                 |
| 70                     | 79.6            | 79.1                 | 92                              | 76.6         | 92.2                 |
| 69                     | 78.9            | 78.4                 | 92                              | 75.7         | 91.9                 |
| 68                     | 78.2            | 77.7                 | 92                              | 74.4         | 91.6                 |
| 67                     | 77.4            | 77                   | 92                              | 73.1         | 91.3                 |
| 66                     | 76.7            | 76.3                 | 92                              | 72.2         | 90.9                 |
| 65                     | 76              | 75.6                 | 92                              | 71.8         | 90.6                 |
| 64                     | 75.3            | 74.9                 | 92                              | 71.3         | 90.3                 |
| 63                     | 74.6            | 74.2                 | 91.9                            | 70.4         | 89.9                 |
| 62                     | 73.9            | 73.4                 | 91.9                            | 69           | 89.6                 |
| 61                     | 73.2            | 72.7                 | 91.9                            | 67.7         | 89.2                 |
| 60                     | 72.5            | 72                   | 91.9                            | 66.7         | 88.9                 |
| 59                     | 71.8            | 71.2                 | 91.9                            | 66.3         | 88.5                 |
| 58                     | 71.1            | 70.5                 | 91.9                            | 65.8         | 88.1                 |
| 57                     | 70.4            | 69.8                 | 91.9                            | 64.8         | 87.8                 |
| 56                     | 69.7            | 69                   | 91.9                            | 63.4         | 87.4                 |
| 55                     | 69              | 68.2                 | 91.9                            | 61.9         | 87                   |
| 54                     | 68.3            | 67.5                 | 91.9                            | 60.9         | 86.6                 |
| 53                     | 67.6            | 66.7                 | 91.9                            | 60.4         | 86.2                 |
| 52                     | 66.9            | 65.9                 | 91.9                            | 59.9         | 85.8                 |
| 51                     | 66.2            | 65.2                 | 91.9                            | 59           | 85.3                 |
| 50                     | 65.5            | 64.4                 | 91.9                            | 57.4         | 84.9                 |
| 49                     | 64.8            | 63.6                 | 91.9                            | 55.9         | 84.5                 |
| 48                     | 64              | 62.8                 | 91.9                            | 55.4         | 84                   |
| 47                     | 63.3            | 62                   | 91.9                            | 54.8         | 83.6                 |
| 46                     | 62.6            | 61.2                 | 91.9                            | 53.2         | 83.1                 |
| 45                     | 61.9            | 60.4                 | 91.9                            | 52.4         | 82.6                 |
| 44                     | 61.2            | 59.6                 | 91.9                            | 51.6         | 82.1                 |
| 43                     | 60.5            | 58.8                 | 91.9                            | 50           | 81.6                 |
| 42                     | 59.8            | 57.9                 | 91.9                            | 49.1         | 81.1                 |
| 41                     | 59.1            | 57.1                 | 91.9                            | 48.3         | 80.6                 |
| 40                     | 58.4            | 56.3                 | 91.9                            | 46.6         | 80                   |
| 39                     | 57.7            | 55.4                 | 91.9                            | 45.8         | 79.5                 |
| 38                     | 57              | 54.6                 | 91.9                            | 45           | 78.9                 |
| 37                     | 56.3            | 53.7                 | 91.9                            | 43.3         | 78.3                 |
| 36                     | 55.6            | 52.8                 | 91.9                            | 41.7         | 77.7                 |
| 35                     | 54.9            | 52                   | 91.9                            | 40.9         | 77.1                 |
| 34                     | 54.2            | 51.1                 | 91.9                            | 40           | 76.5                 |
| 33                     | 53.5            | 50.2                 | 91.9                            | 38.4         | 75.8                 |
| 32                     | 52.8            | 49.4                 | 91.9                            | 37.5         | 75.2                 |
| 31                     | 52.1            | 48.5                 | 91.9                            | 36.7         | 74.5                 |
| 30                     | 51.3            | 47.7                 | 91.9                            | 35           | 73.8                 |
| 29                     | 50.6            | 47                   | 91.9                            | 34.1         | 73                   |
| 28                     | 49.9            | 46.2                 | 91.9                            | 33.2         | 72.3                 |
| 27                     | 49.1            | 45.4                 | 91.9                            | 31.5         | 71.5                 |
| 26                     | 48.4            | 44.8                 | 91.9                            | 30.6         | 70.7                 |



|    |      |      |      |      |      |
|----|------|------|------|------|------|
| 25 | 47.6 | 44   | 91.9 | 29.8 | 69.8 |
| 24 | 46.9 | 43.3 | 91.9 | 28.6 | 68.9 |
| 23 | 46.1 | 42.7 | 91.9 | 27.5 | 68   |
| 22 | 45.3 | 42.1 | 91.9 | 26.7 | 67   |
| 21 | 44.5 | 41.5 | 91.9 | 25.8 | 66   |
| 20 | 43.7 | 41   | 91.9 | 24.1 | 64.9 |
| 19 | 42.9 | 40.5 | 91.9 | 22.9 | 63.8 |
| 18 | 42.1 | 40.1 | 91.9 | 21.7 | 62.6 |
| 17 | 41.3 | 39.7 | 91.9 | 19.8 | 61.4 |
| 16 | 40.4 | 39.3 | 91.9 | 18.9 | 60.1 |
| 15 | 39.5 | 39.2 | 91.9 | 17.9 | 58.7 |
| 14 | 38.6 | 39   | 91.9 | 16   | 57.2 |
| 13 | 37.6 | 38.6 | 91.9 | 15.4 | 55.6 |
| 12 | 36.6 | 38.5 | 91.9 | 14.8 | 53.8 |
| 11 | 35.6 | 38.5 | 91.9 | 13.7 | 51.9 |
| 10 | 34.6 | 38.5 | 91.9 | 11.9 | 49.8 |
| 9  | 33.5 | 38.5 | 91.9 | 10   | 47.5 |
| 8  | 32.4 | 38.5 | 91.9 | 9.1  | 45   |
| 7  | 31.2 | 38.5 | 91.9 | 8.3  | 42.1 |
| 6  | 30   | 38.5 | 91.9 | 6.9  | 38.7 |
| 5  | 28.9 | 38.5 | 91.9 | 5.5  | 34.7 |
| 4  | 27.7 | 38.5 | 91.9 | 4.4  | 29.9 |
| 3  | 26.3 | 38.5 | 91.9 | 3.3  | 23.6 |
| 2  | 24.9 | 38.5 | 91.9 | 1.7  | 14.8 |
| 1  | 23.5 | 38.5 | 91.9 | 0.8  | 14.8 |
| 0  | 23.5 | 38.5 | 91.9 | 0    | 0    |

\* Subtracted from one so that higher values are preferable to lower, as with other indicators  
Accuracy values are global average. Region-specific values were used in final computation.

Appendix Table 5. Example Simulation Procedure.

Description: This table depicts a simplified demonstration of the simulation procedure for six hypothetical causes of death and for indicator representing unspecified age or sex.

Column A: This column displays the names of the six hypothetical causes of death in this demonstration. There are two infectious diseases (A1 and A2), two non-communicable diseases (B1 and B2) and two injuries (C1 and C2)

Column B: This column displays the proportion (in this hypothetical scenario) of each cause which was reported with either an unknown age or unknown sex.

Column C: In the actual simulation, these proportions were computed by dividing the number of unspecified deaths by the total number of deaths, one cause at a time, amongst all ICD10 data.

Column D: This column is simply a normalized, or rescaled, transformation of column B. Each proportion in column B was divided by the total of column B to normalize the proportions such that they sum to 1. This is done for operational purposes which will become clear at later stages. (See formulas below)

Column E: This column displays the (hypothetical) death counts from the simulation dataset, which was described in the methods section of the text. Briefly, the simulation dataset is the region-level GBD 2010 estimates with added noise. These death counts have been arbitrarily generated to sum to 50 total deaths and do not reflect anything used in the actual simulation.

Column F: This column is simply the cause-specific mortality fractions (CSMFs) associated with the death counts from column D. Like column C, these were computed by dividing each row in column D by the total of column D. (See formulas below)

Column G: This column displays the resulting death counts from the simulation at a level of 5% simulated loss (described in the methods section of the text).

Column H: In other words, in this iteration of the simulation, 5% (2.5 deaths) of the total number of deaths are lost due to unspecified ages or sexes.

Column I: The 2.5 lost deaths were not evenly distributed amongst the six causes. Instead, column C was multiplied by 2.5 to distribute the lost deaths according to the proportions in column B, and these products were subtracted from column D. (See formulas below)

Column J: This column is simply the cause-specific mortality fractions (CSMFs) associated with the death counts from column H. Like column F, these were computed by dividing each row in column H by the total of column H. (See formulas below)

Column K: This column is identical to column F, with the exception that it represents another iteration of the simulation at a level of 15% simulated loss.

Column L: This column is identical to column G, with the exception that it represents another iteration of the simulation at a level of 25% simulated loss.

Column M: This column displays the CSMF accuracy associated with the iteration of the simulation depicted by column G. It is the CSMF accuracy, or degree of concordance between the CSMFs in column G and the CSMFs in column E. CSMF accuracy is described in the methods section of the text, and the exact formula is listed below. Note that although 5% of all deaths are lost due to unspecified ages or sexes, only 3.3% accuracy is lost.

Column N: CSMF accuracy is described in the methods section of the text, and the exact formula is listed below. Note that although 15% of all deaths are lost due to unspecified ages or sexes, only 11.1% accuracy is lost.

Column O: CSMF accuracy is described in the methods section of the text, and the exact formula is listed below. Note that although 25% of all deaths are lost due to unspecified ages or sexes, only 21% accuracy is lost.

Also note that as the simulated loss increases (over columns L, M and N), the hypothetical CSMFs (columns G, I and K) become increasingly more distorted, resulting in more CSMF accuracy loss as a fraction of simulated loss.

| A     | B                                                       | C                                           | D                 | E               | F                                         | G                                       | H                                          | I                                        | J                                          | K                                        |
|-------|---------------------------------------------------------|---------------------------------------------|-------------------|-----------------|-------------------------------------------|-----------------------------------------|--------------------------------------------|------------------------------------------|--------------------------------------------|------------------------------------------|
| Cause | Average Age/Sex Unknown Proportion (Computed from data) | Average Age/Sex Unknown Proportion Rescaled | Simulation Deaths | Simulation CSMF | Hypothetical Deaths (Simulated Loss = 5%) | Hypothetical CSMF (Simulated Loss = 5%) | Hypothetical Deaths (Simulated Loss = 15%) | Hypothetical CSMF (Simulated Loss = 15%) | Hypothetical Deaths (Simulated Loss = 25%) | Hypothetical CSMF (Simulated Loss = 25%) |
| A1    | 0.005                                                   | 0.040                                       | 5                 | 0.100           | 4.901                                     | 0.103                                   | 4.702                                      | 0.111                                    | 4.504                                      | 0.120                                    |
| A2    | 0.05                                                    | 0.397                                       | 8                 | 0.160           | 7.098                                     | 0.148                                   | 5.024                                      | 0.118                                    | 9.060                                      | 0.081                                    |
| B1    | 0.002                                                   | 0.016                                       | 12                | 0.240           | 11.960                                    | 0.252                                   | 11.881                                     | 0.280                                    | 11.802                                     | 0.315                                    |
| B2    | 0.004                                                   | 0.032                                       | 17                | 0.340           | 16.921                                    | 0.356                                   | 16.762                                     | 0.398                                    | 16.603                                     | 0.443                                    |
| C1    | 0.015                                                   | 0.118                                       | 3                 | 0.060           | 2.762                                     | 0.057                                   | 2.107                                      | 0.050                                    | 1.512                                      | 0.040                                    |
| C2    | 0.05                                                    | 0.397                                       | 5                 | 0.100           | 4.008                                     | 0.084                                   | 2.024                                      | 0.048                                    | 0.040                                      | 0.001                                    |

| Column | Formula                                                                                                                             | L<br>CSMF Accuracy (Simulated Loss = 5%) | M<br>CSMF Accuracy (Simulated Loss = 15%) | N<br>CSMF Accuracy (Simulated Loss = 25%) |
|--------|-------------------------------------------------------------------------------------------------------------------------------------|------------------------------------------|-------------------------------------------|-------------------------------------------|
| A      | N/A                                                                                                                                 |                                          |                                           |                                           |
| B      | deaths unknown / total deaths (from all ICD10 data aggregated)                                                                      |                                          |                                           |                                           |
| C      | $B / \text{SUM}(B)$                                                                                                                 |                                          |                                           |                                           |
| D      | N/A                                                                                                                                 |                                          |                                           |                                           |
| E      | $D / \text{SUM}(D)$                                                                                                                 |                                          |                                           |                                           |
| F      | $D \cdot (C / (0.05 \cdot \text{SUM}(D)))$                                                                                          |                                          |                                           |                                           |
| G      | $F / \text{SUM}(F)$                                                                                                                 |                                          |                                           |                                           |
| H      | $D \cdot (C / (0.15 \cdot \text{SUM}(D)))$                                                                                          |                                          |                                           |                                           |
| I      | $H / \text{SUM}(H)$                                                                                                                 |                                          |                                           |                                           |
| J      | $D \cdot (C / (0.25 \cdot \text{SUM}(D)))$                                                                                          |                                          |                                           |                                           |
| K      | $J / \text{SUM}(J)$                                                                                                                 |                                          |                                           |                                           |
| L      | $1 - ((\text{SUM}(ABS(E3-G3)) + ABS(E4-G4)) + ABS(E5-G5)) + ABS(E6-G6)) + ABS(E7-G7) + ABS(E8-G8)) / (2 * (1 - \text{MIN}(E3-E8)))$ | 86.7%                                    | 88.9%                                     | 79.0%                                     |
| M      | $1 - ((\text{SUM}(ABS(E3-I3)) + ABS(E4-I4)) + ABS(E5-I5)) + ABS(E6-I6)) + ABS(E7-I7) + ABS(E8-I8)) / (2 * (1 - \text{MIN}(E3-E8)))$ |                                          |                                           |                                           |
| N      | $1 - ((\text{SUM}(ABS(E3-K3)) + ABS(E4-K4)) + ABS(E5-K5)) + ABS(E6-K6)) + ABS(E7-K7) + ABS(E8-K8)) / (2 * (1 - \text{MIN}(E3-E8)))$ |                                          |                                           |                                           |

# Albania

## VS Performance Index

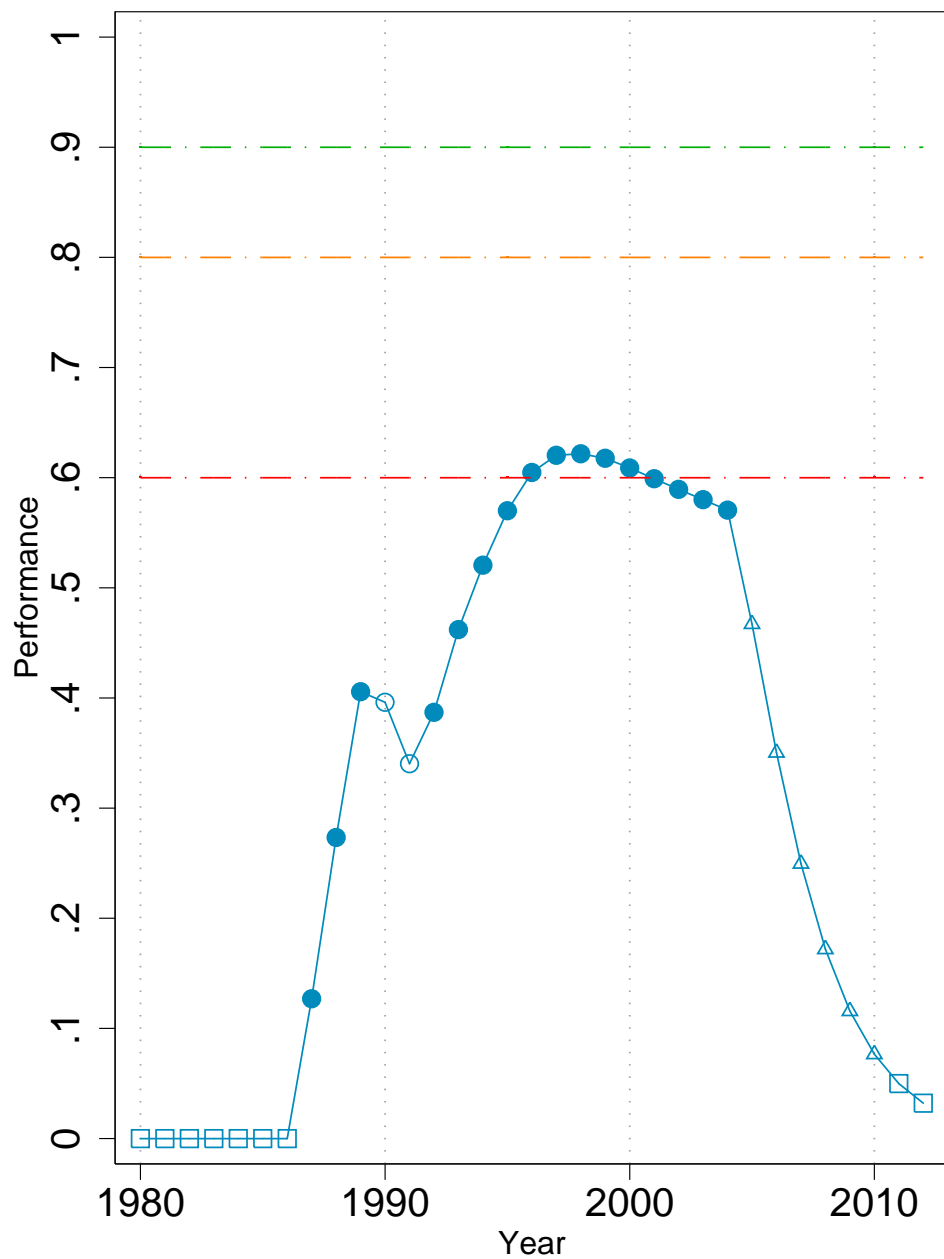

### Completeness

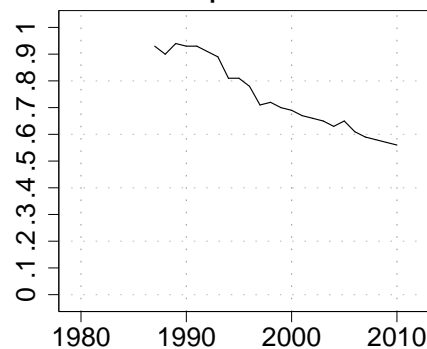

### Garbage Coding

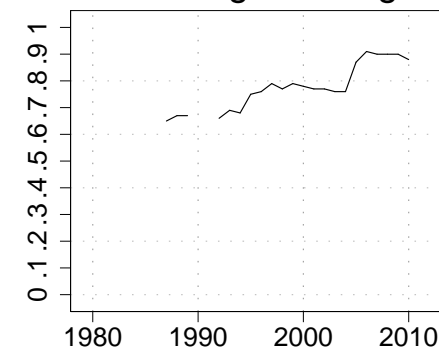

### Length of Cause List

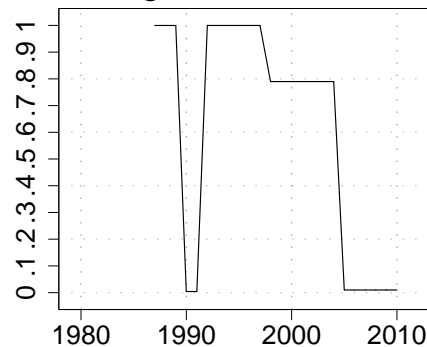

### Age/Sex Unspecified

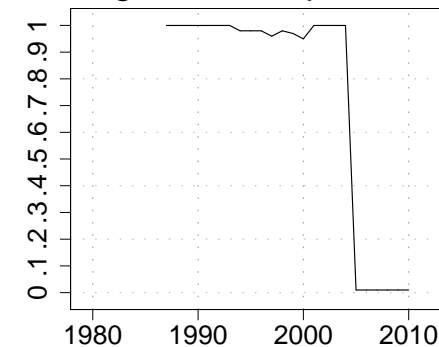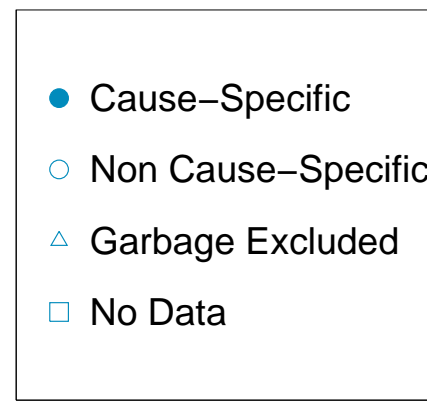

### Medically Impossible Diagnoses

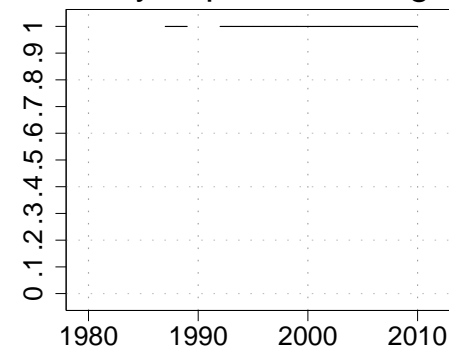

Indicators on their Original (Unweighted) Scale and Subtracted from One Where Necessary so Higher Scores are Preferable to Lower

# Algeria

## VS Performance Index

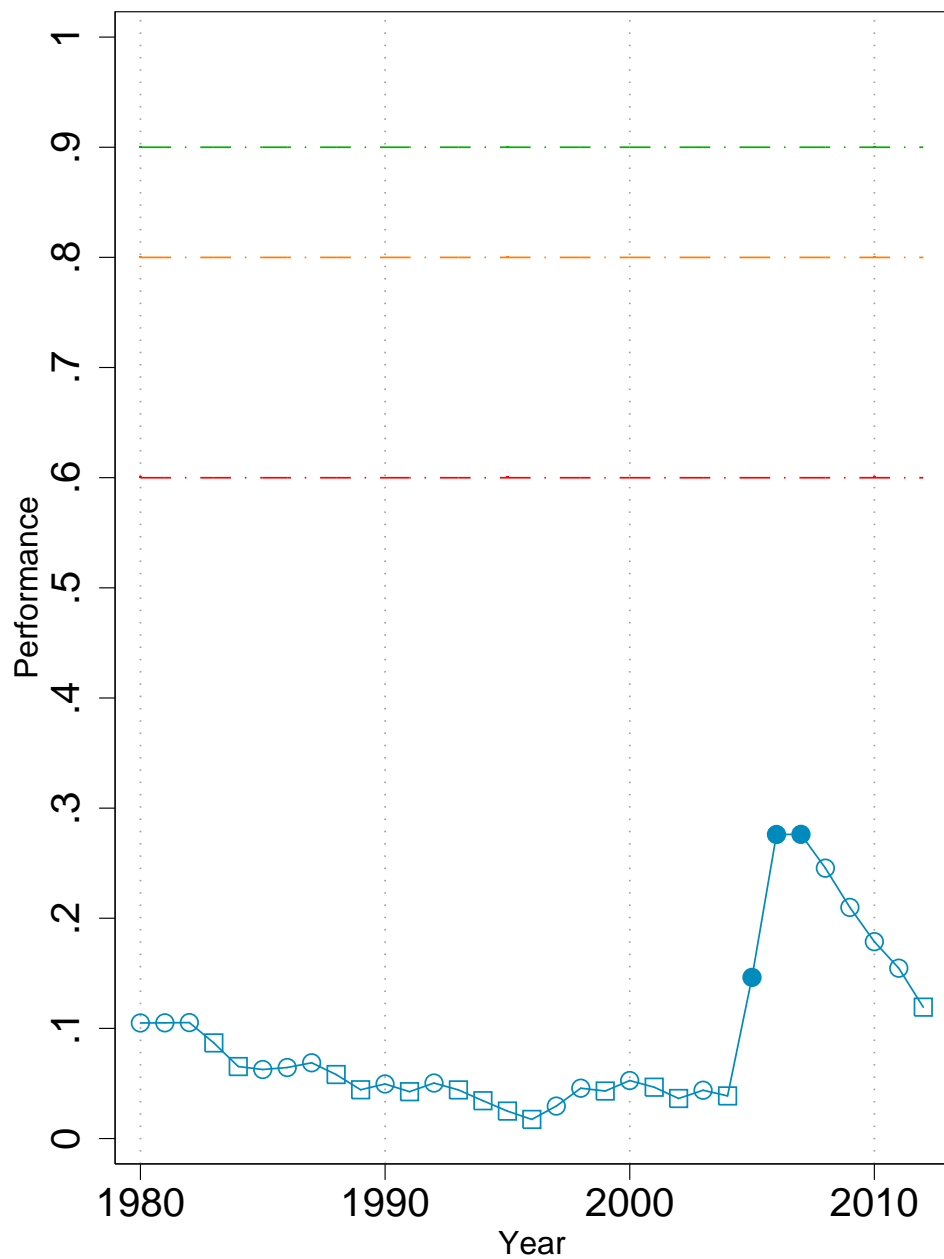

### Completeness

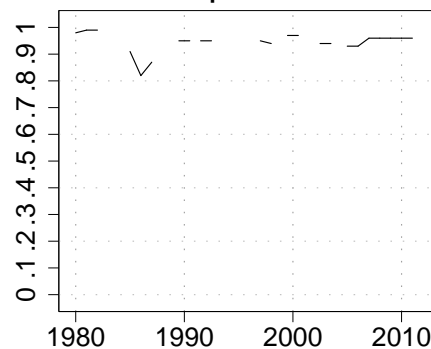

### Garbage Coding

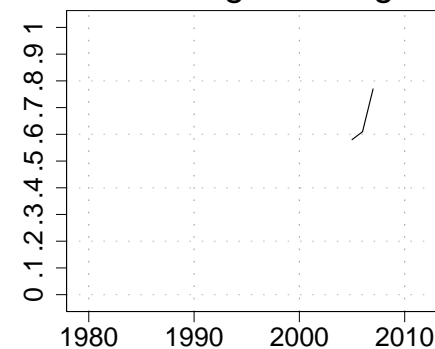

### Length of Cause List

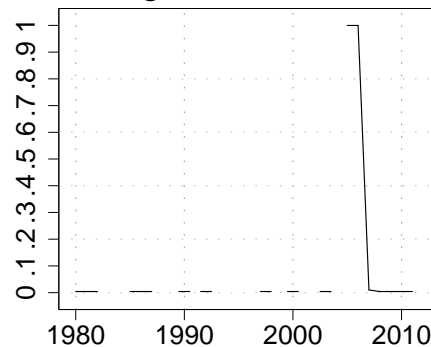

### Age/Sex Unspecified

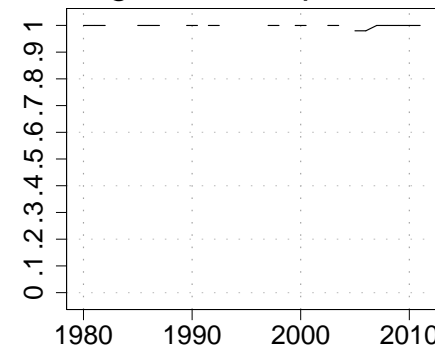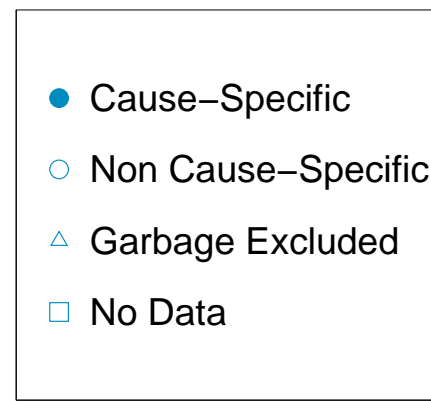

### Medically Impossible Diagnoses

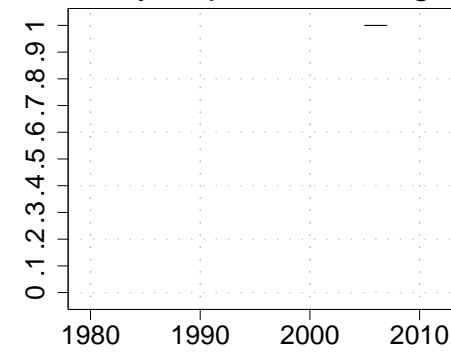

Indicators on their Original (Unweighted) Scale and Subtracted from One Where Necessary so Higher Scores are Preferable to Lower

# Andorra

## VS Performance Index

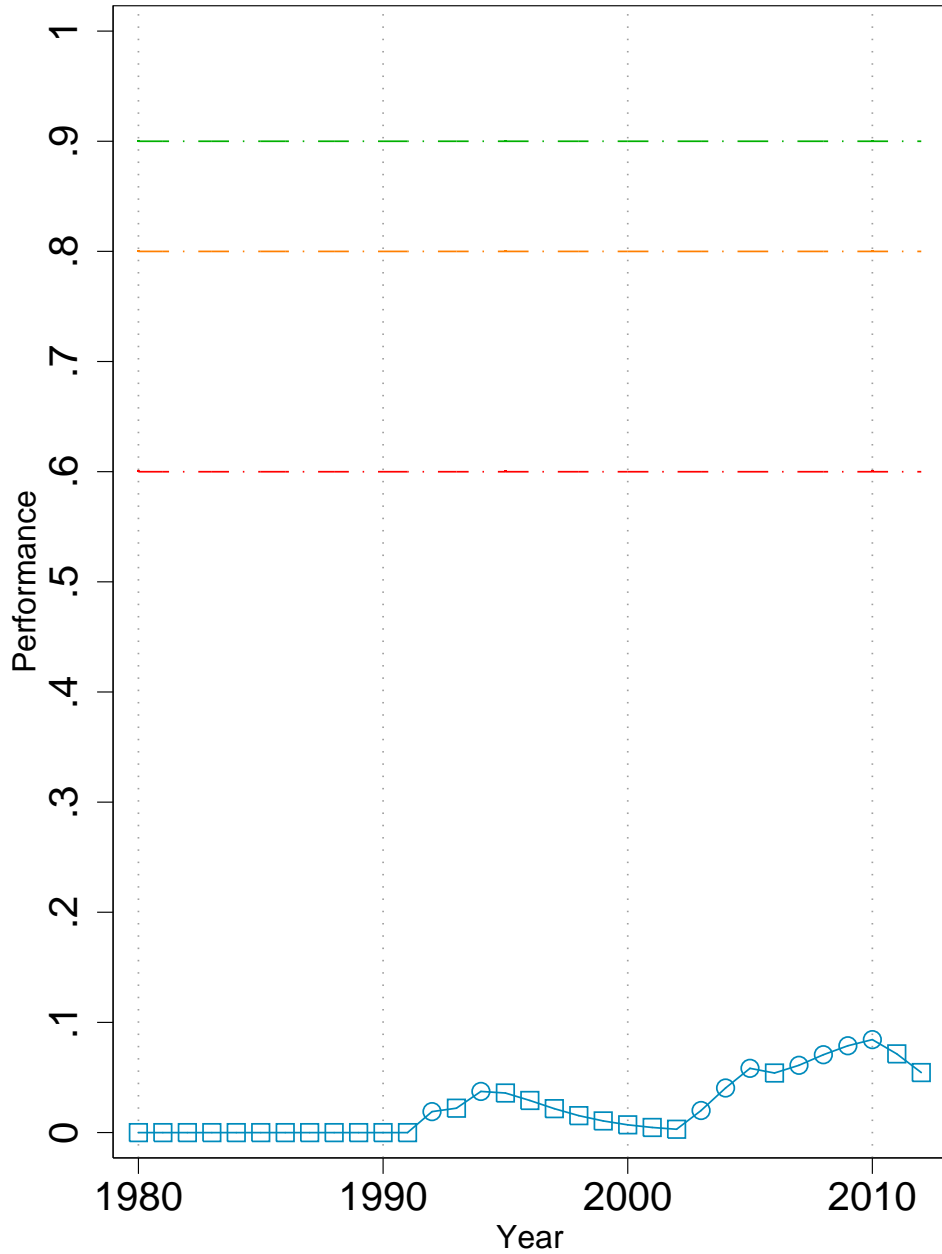

### Completeness

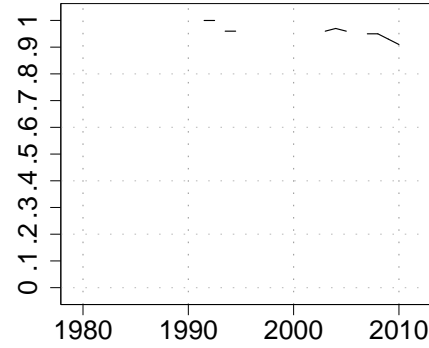

### Garbage Coding

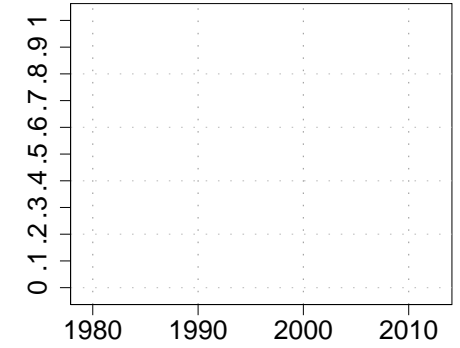

### Length of Cause List

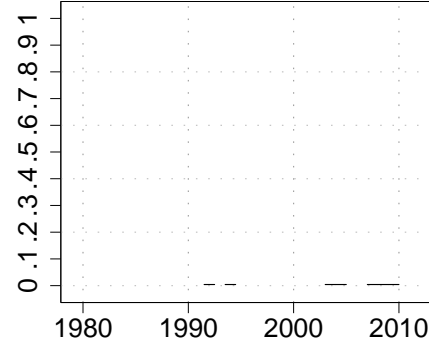

### Age/Sex Unspecified

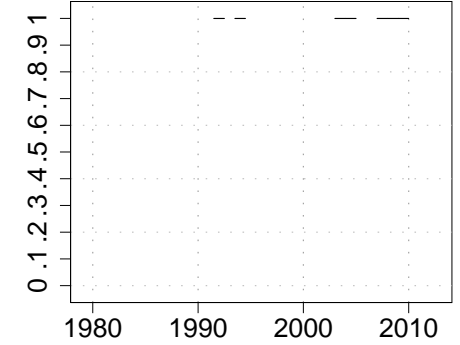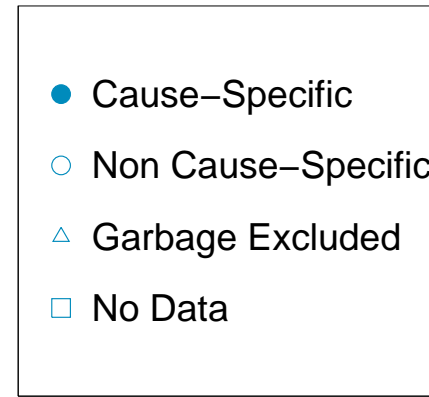

### Medically Impossible Diagnoses

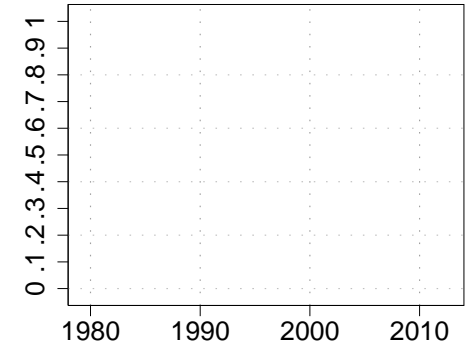

Indicators on their Original (Unweighted) Scale and Subtracted from One Where Necessary so Higher Scores are Preferable to Lower

# Antigua and Barbuda VS Performance Index

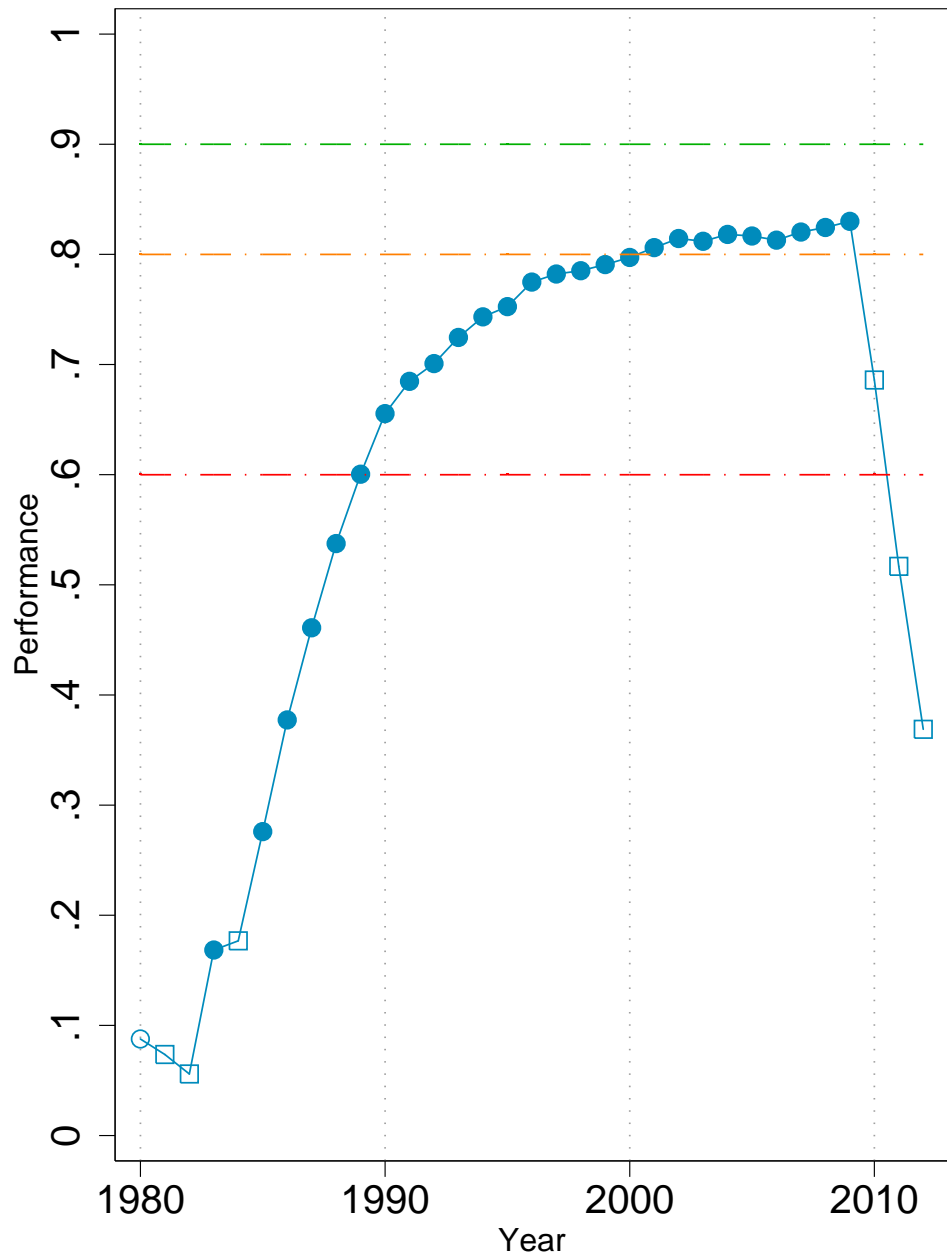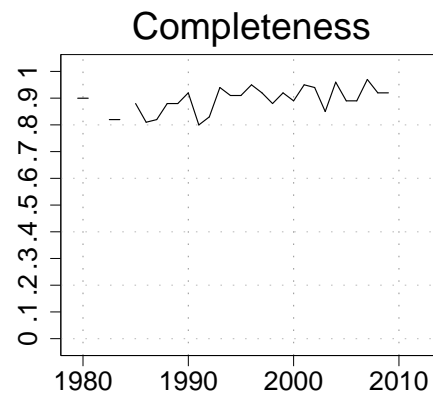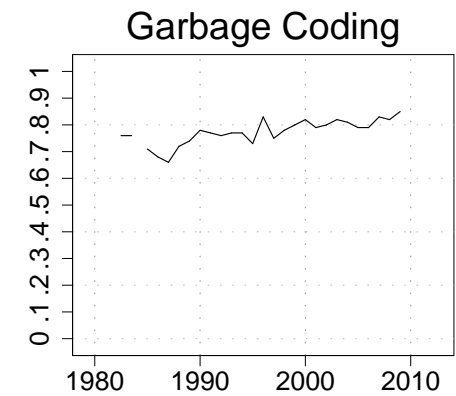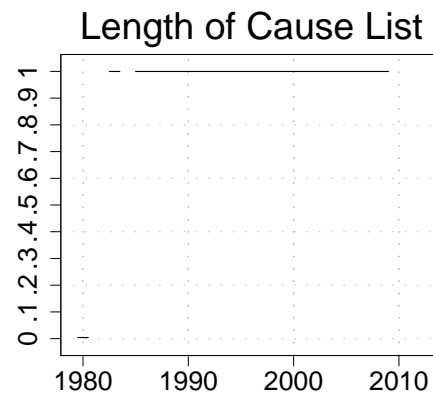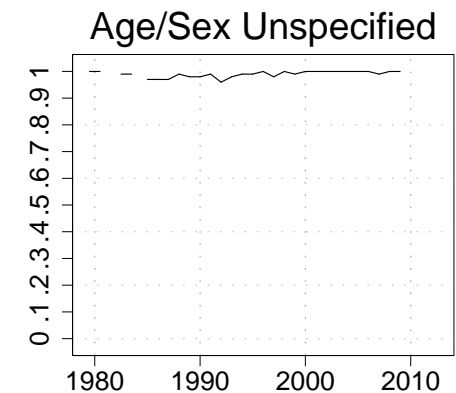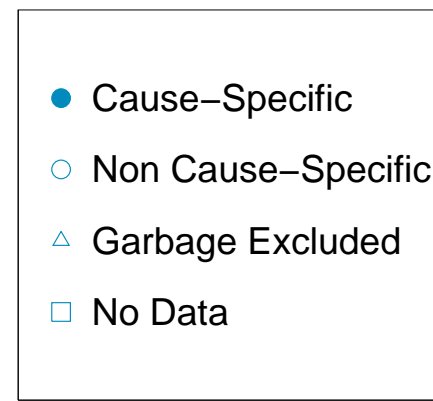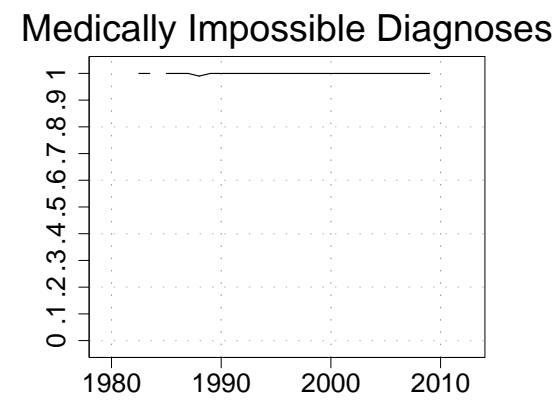

Indicators on their Original (Unweighted) Scale and Subtracted from One Where Necessary so Higher Scores are Preferable to Lower

# Argentina

## VS Performance Index

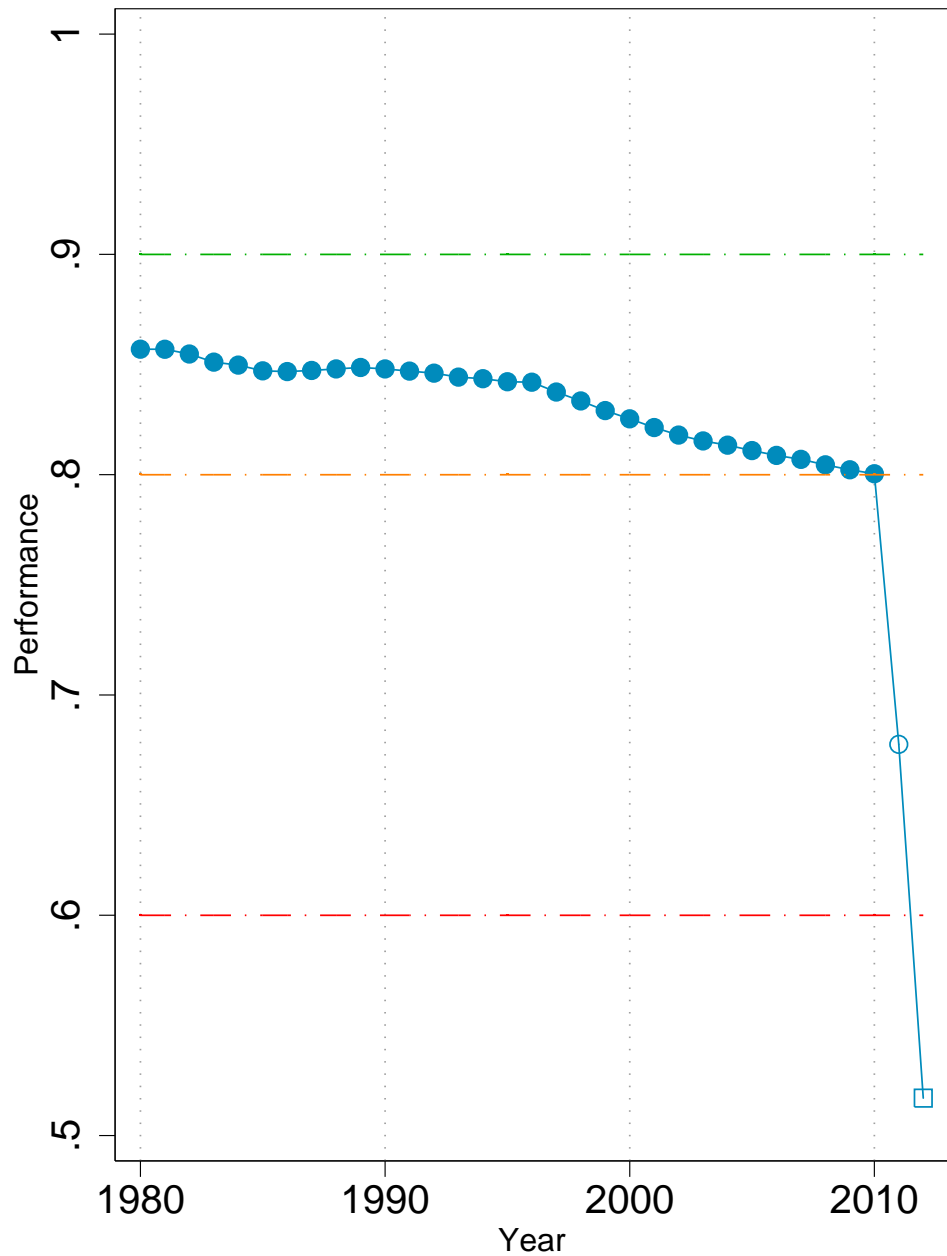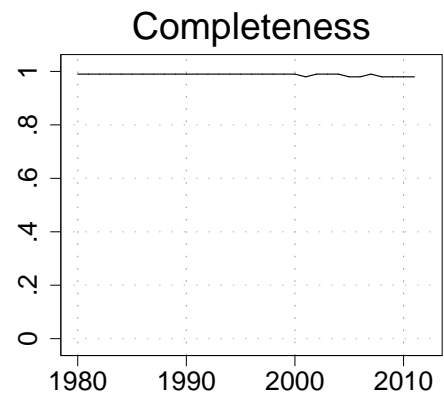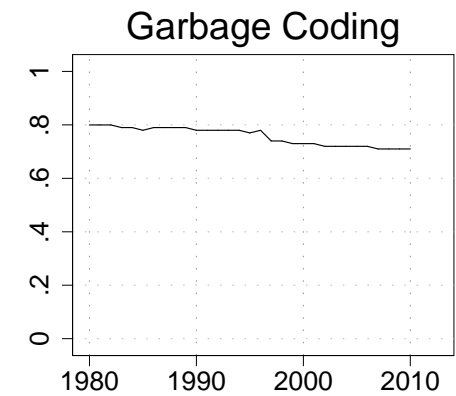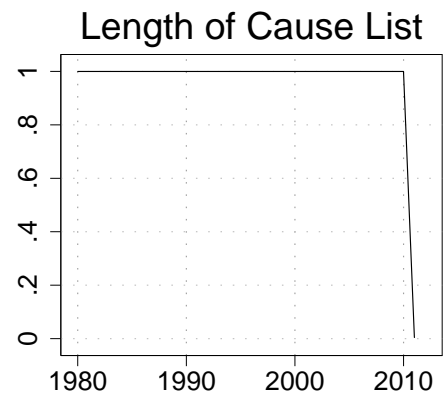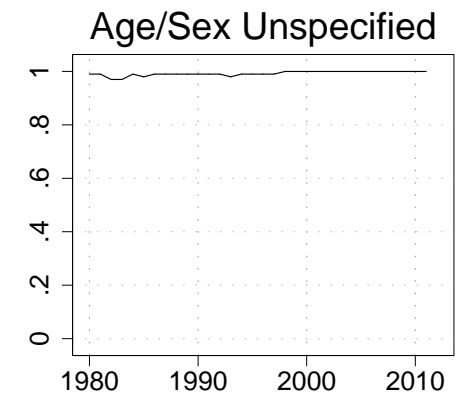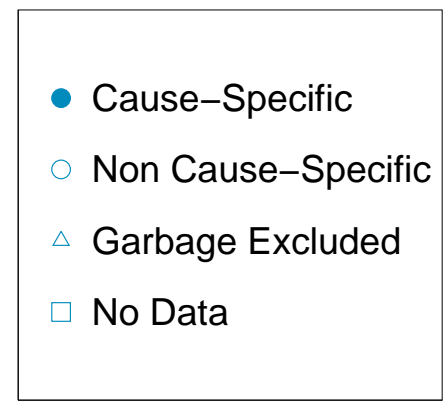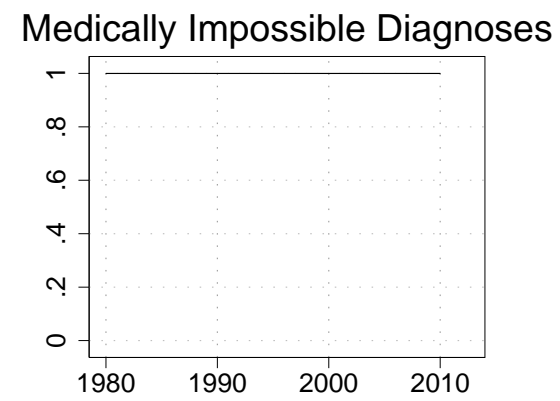

Indicators on their Original (Unweighted) Scale and Subtracted from One Where Necessary so Higher Scores are Preferable to Lower

# Armenia

## VS Performance Index

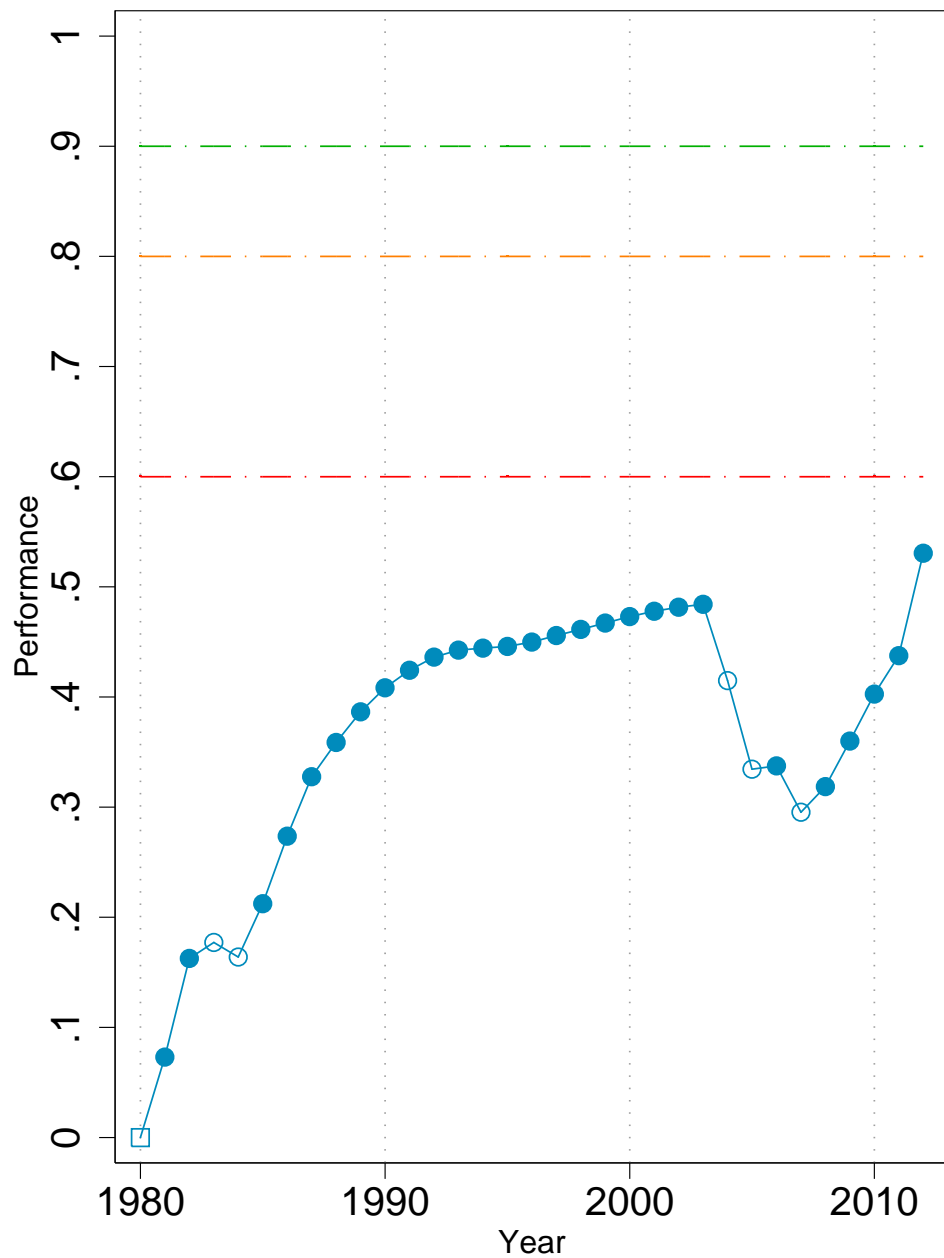

### Completeness

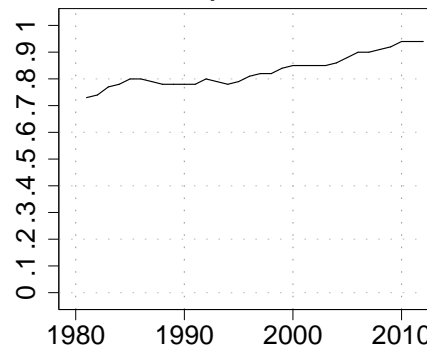

### Garbage Coding

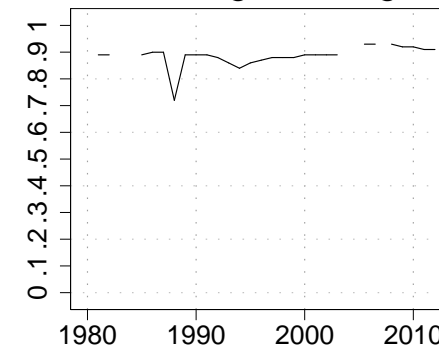

### Length of Cause List

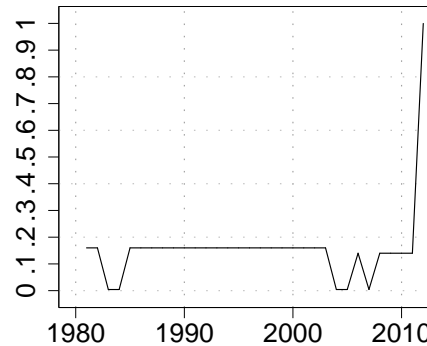

### Age/Sex Unspecified

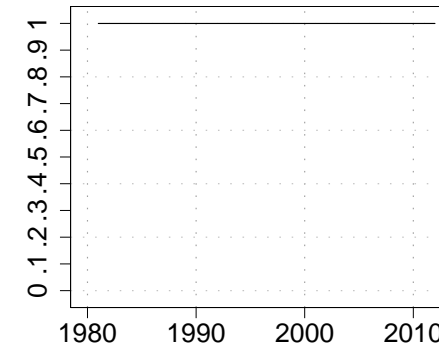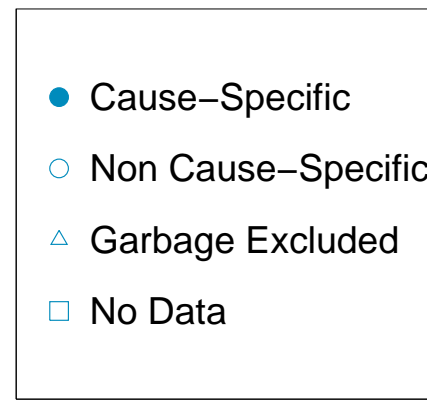

### Medically Impossible Diagnoses

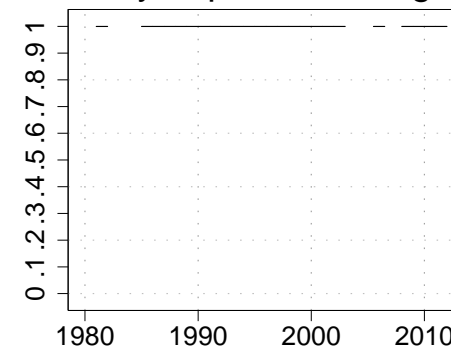

Indicators on their Original (Unweighted) Scale and Subtracted from One Where Necessary so Higher Scores are Preferable to Lower



# Australia

## VS Performance Index

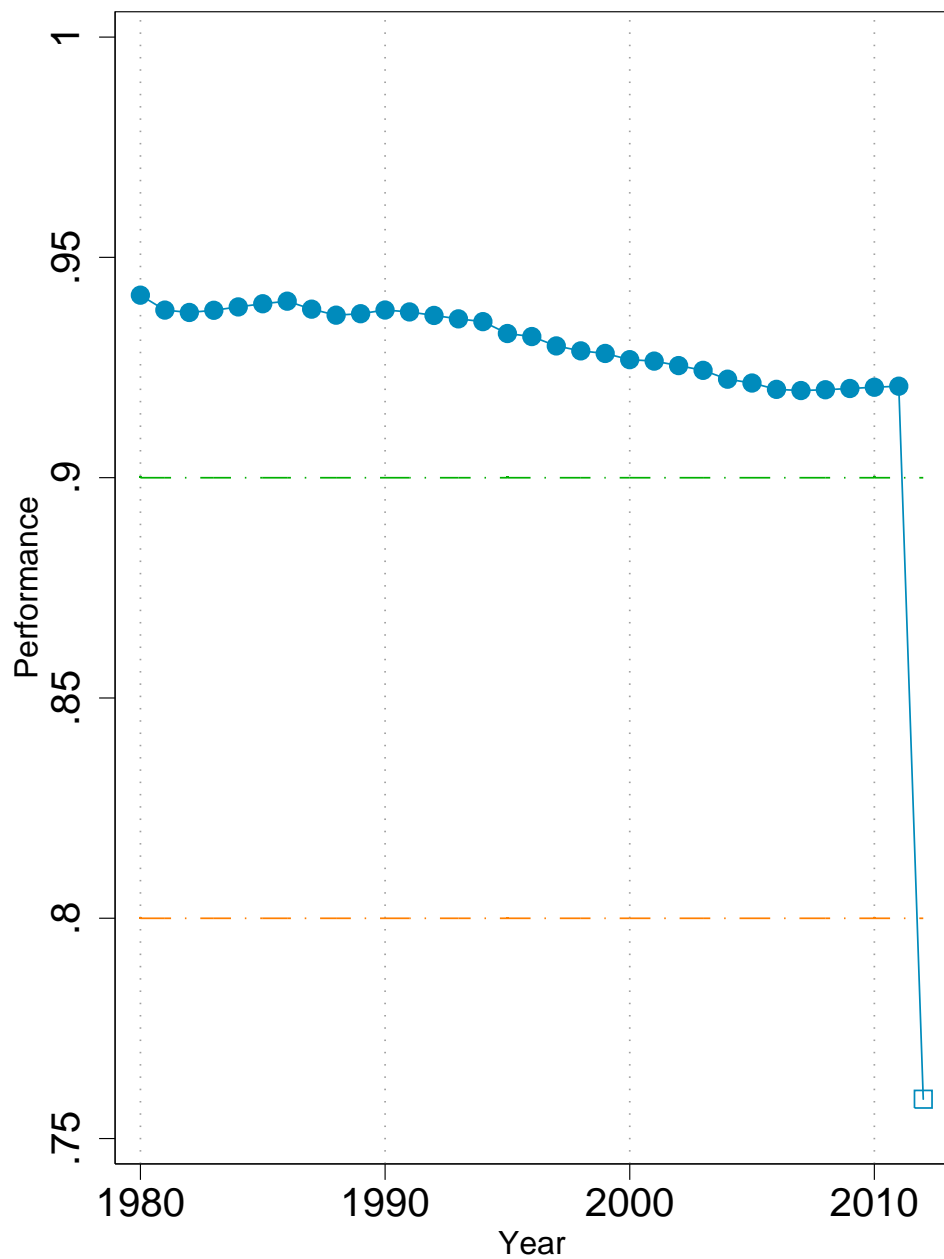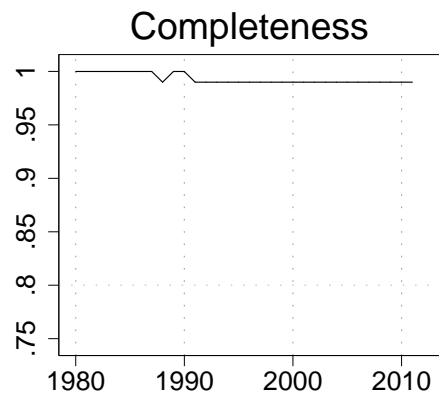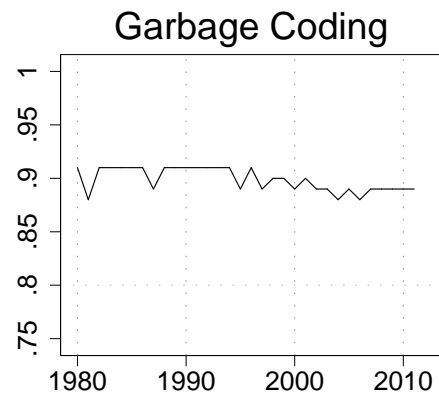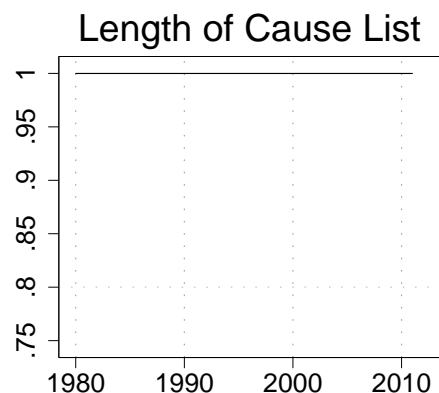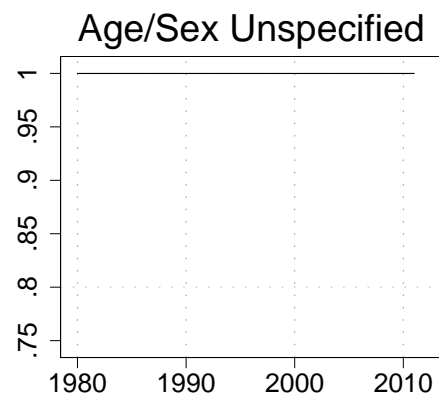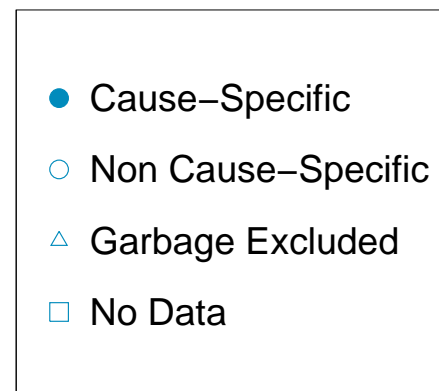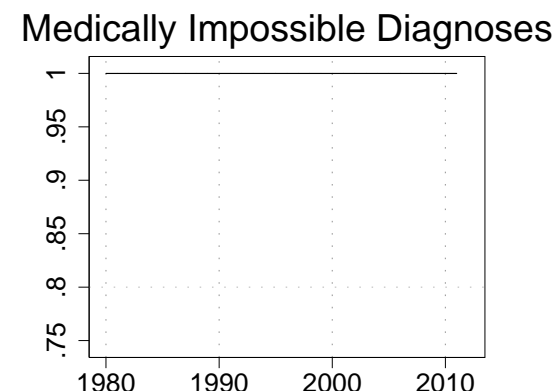

Indicators on their Original (Unweighted) Scale and Subtracted from One Where Necessary so Higher Scores are Preferable to Lower

# Austria

## VS Performance Index

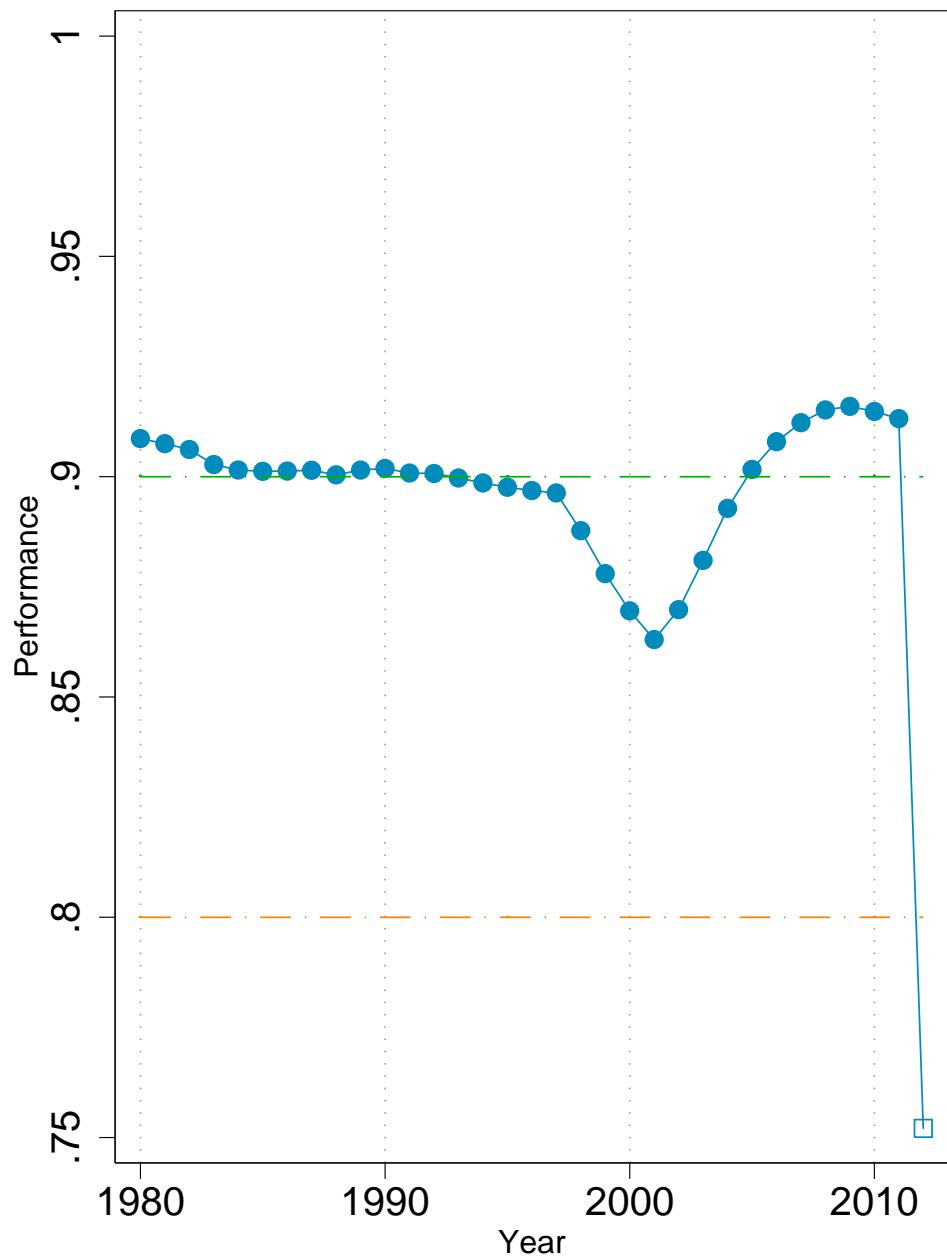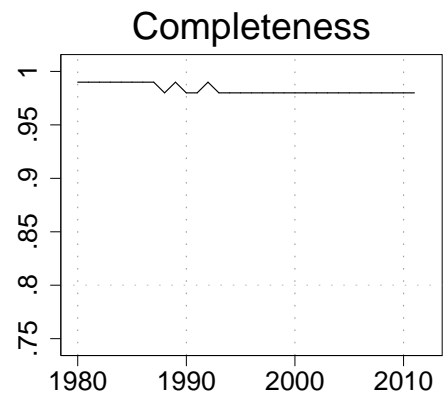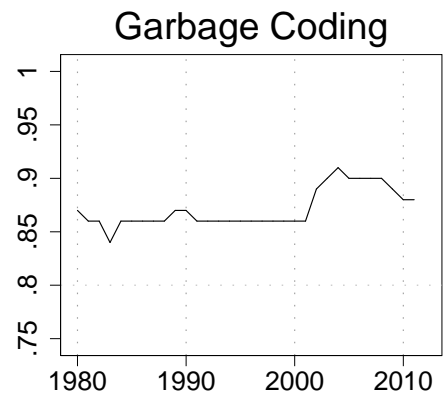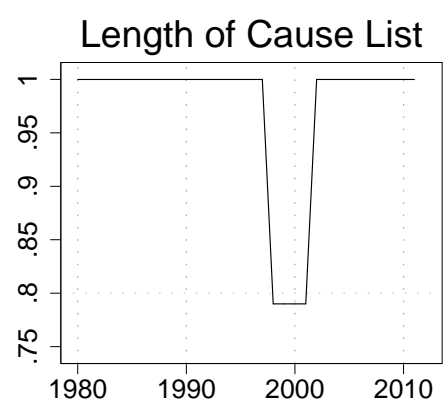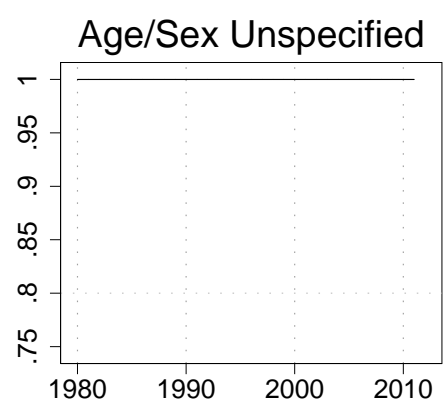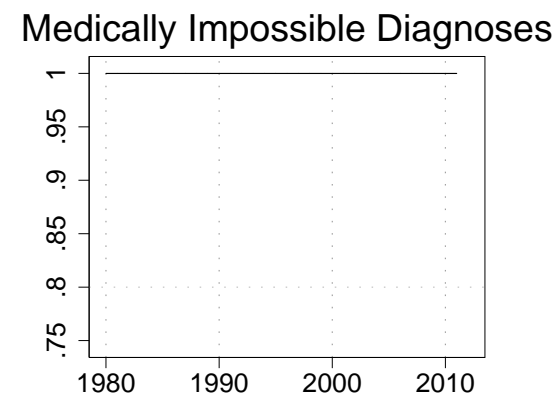

Indicators on their Original (Unweighted) Scale and Subtracted from One Where Necessary so Higher Scores are Preferable to Lower

# Azerbaijan

## VS Performance Index

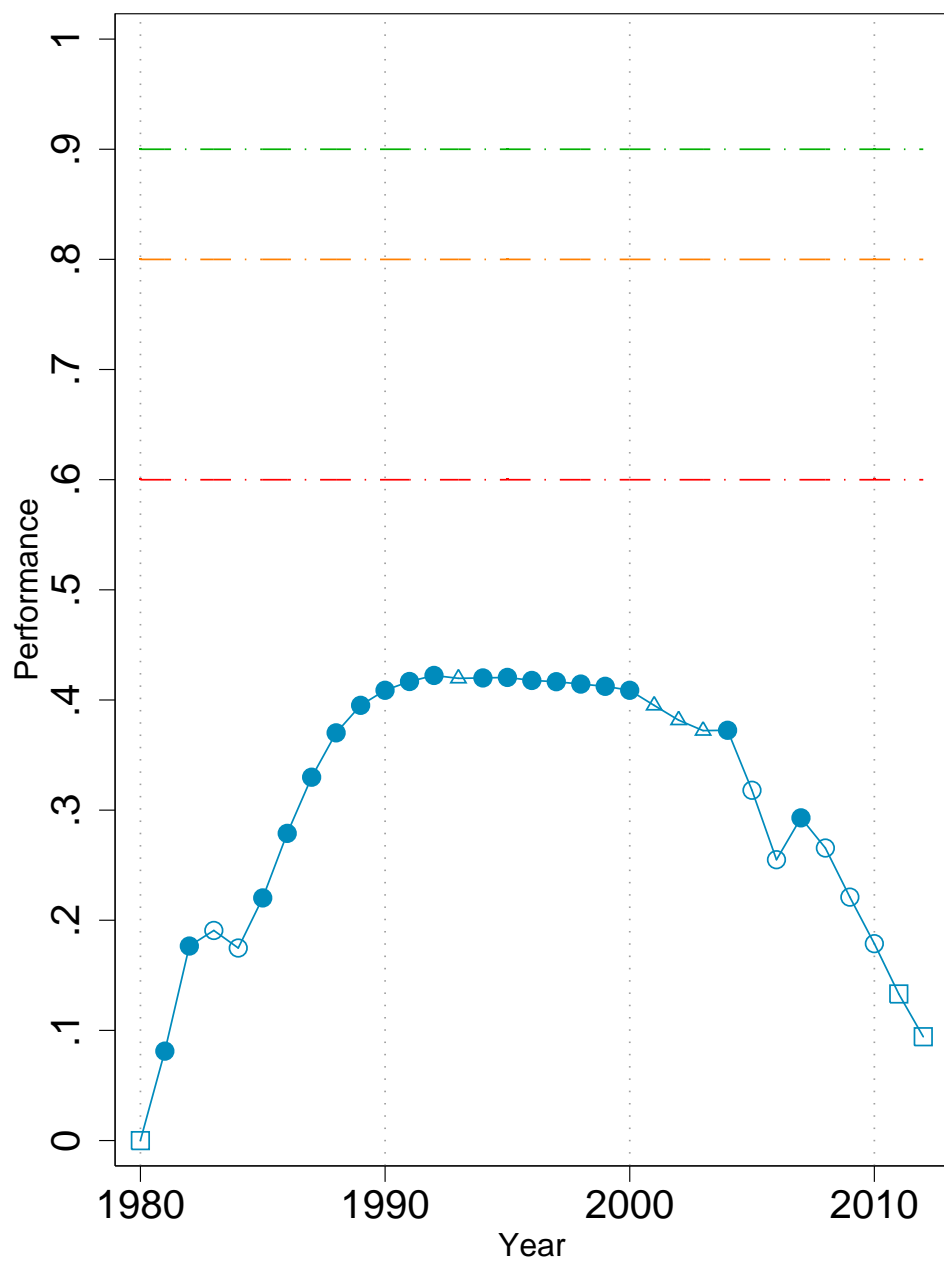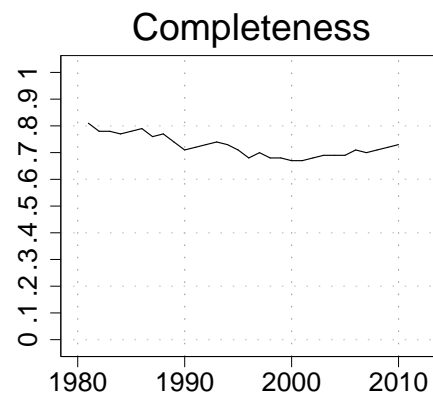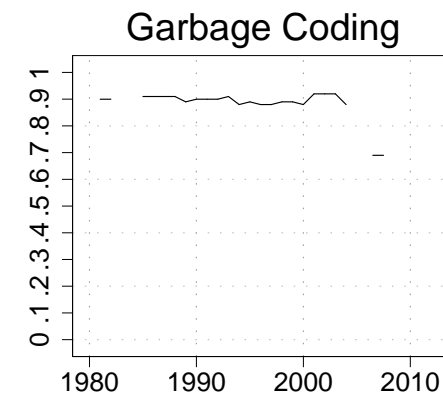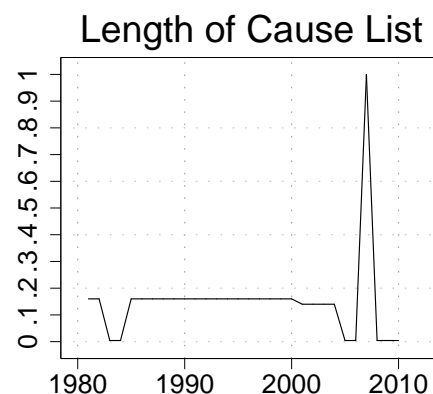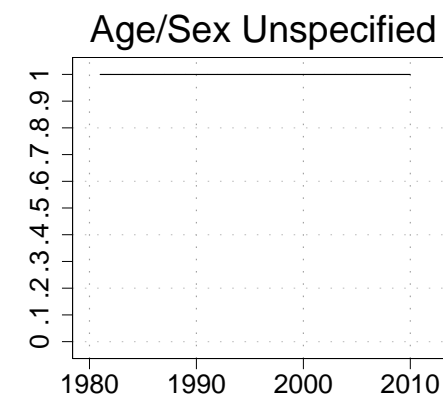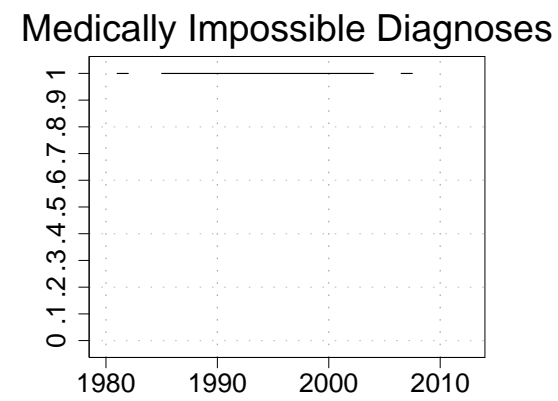

Indicators on their Original (Unweighted) Scale and Subtracted from One Where Necessary so Higher Scores are Preferable to Lower

# Bahamas

## VS Performance Index

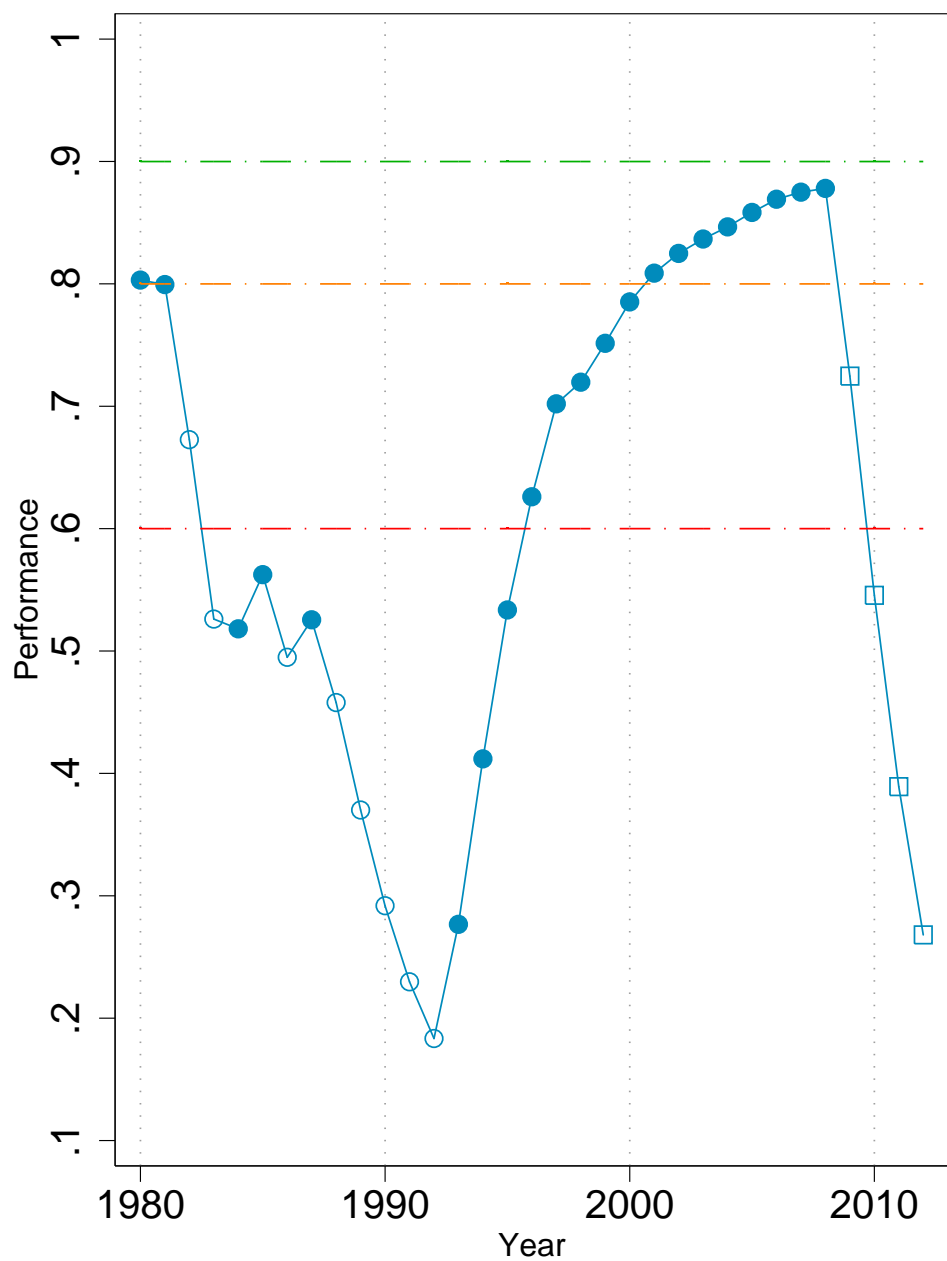

### Completeness

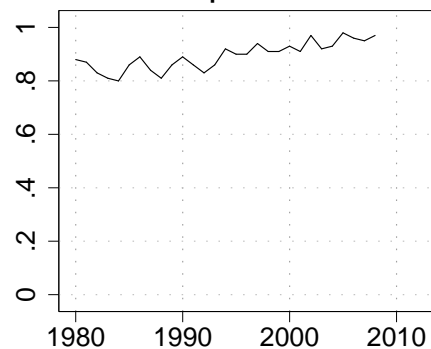

### Garbage Coding

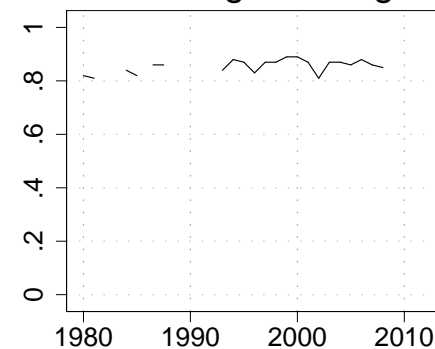

### Length of Cause List

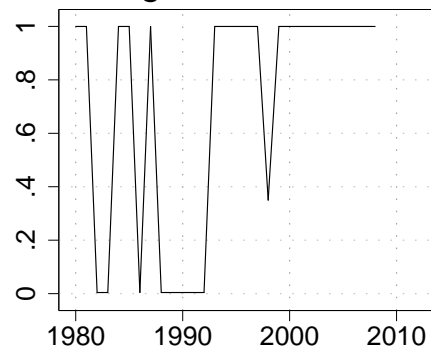

### Age/Sex Unspecified

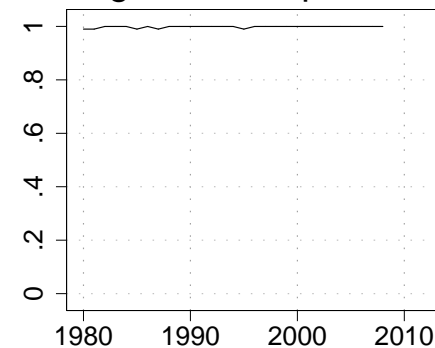

### Medically Impossible Diagnoses

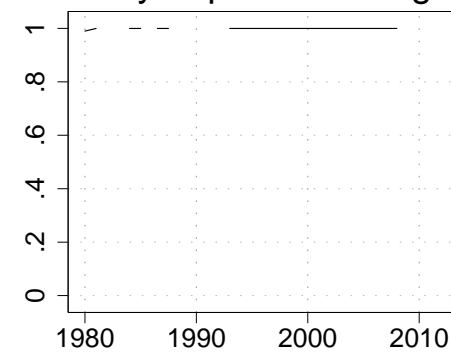

Indicators on their Original (Unweighted) Scale and Subtracted from One Where Necessary so Higher Scores are Preferable to Lower

# Bahrain

## VS Performance Index

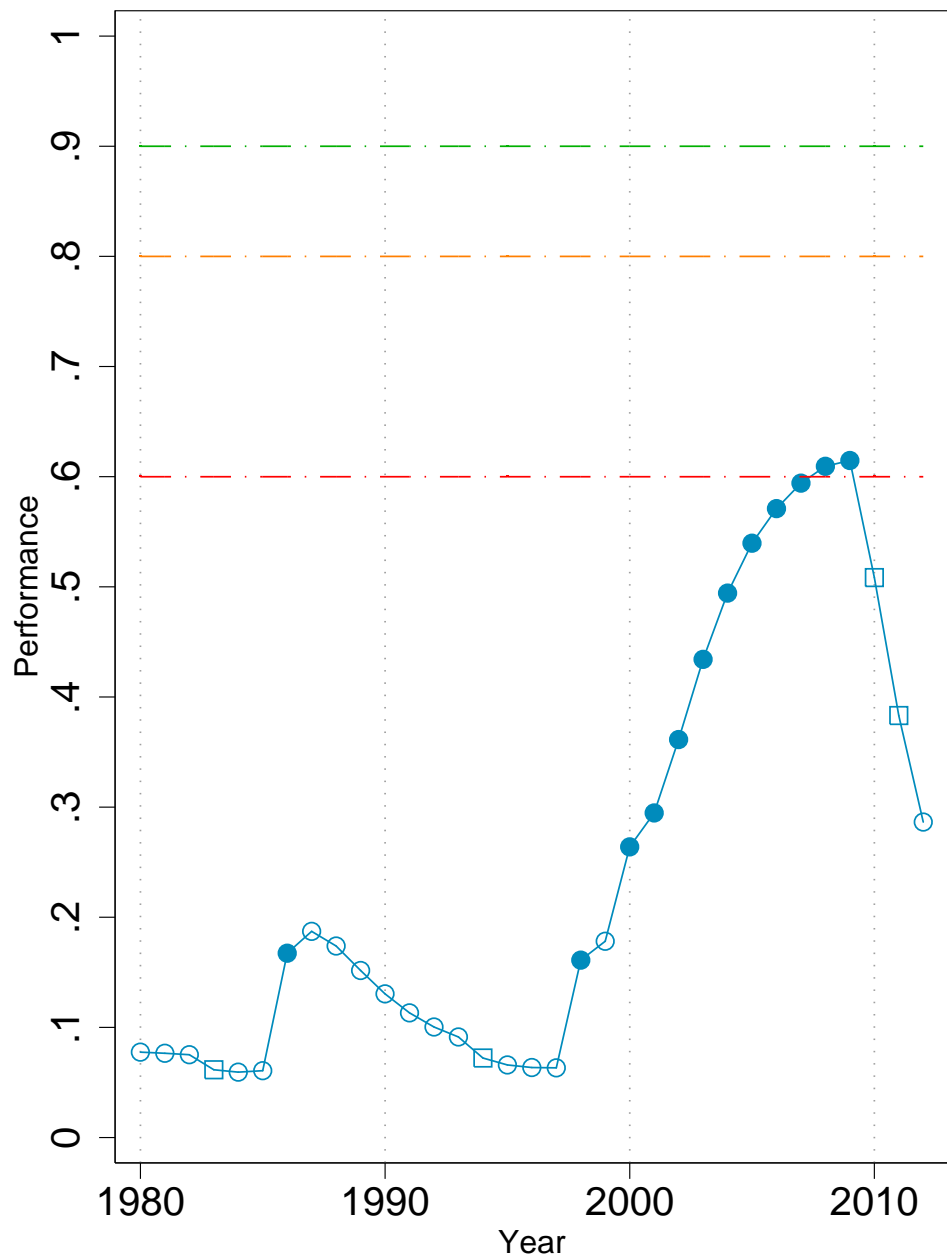

### Completeness

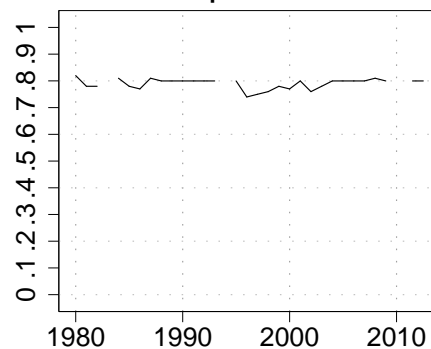

### Garbage Coding

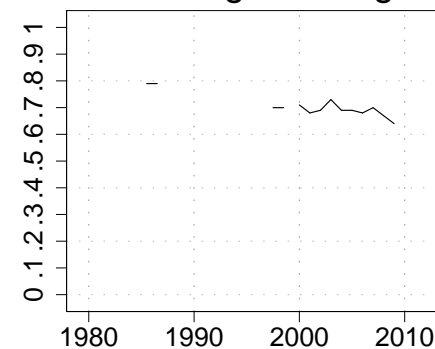

### Length of Cause List

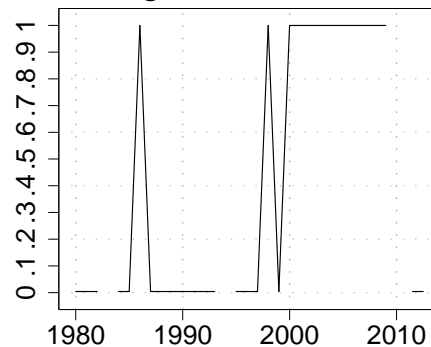

### Age/Sex Unspecified

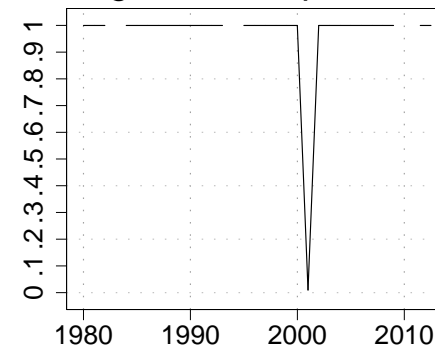

### Medically Impossible Diagnoses

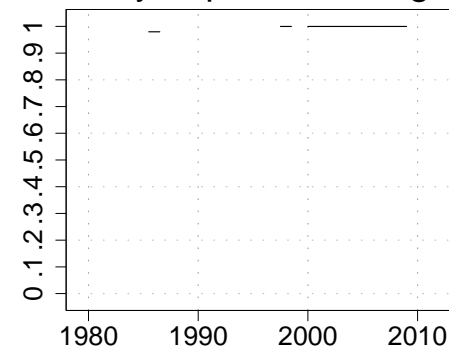

Indicators on their Original (Unweighted) Scale and Subtracted from One Where Necessary so Higher Scores are Preferable to Lower

# Bangladesh

## VS Performance Index

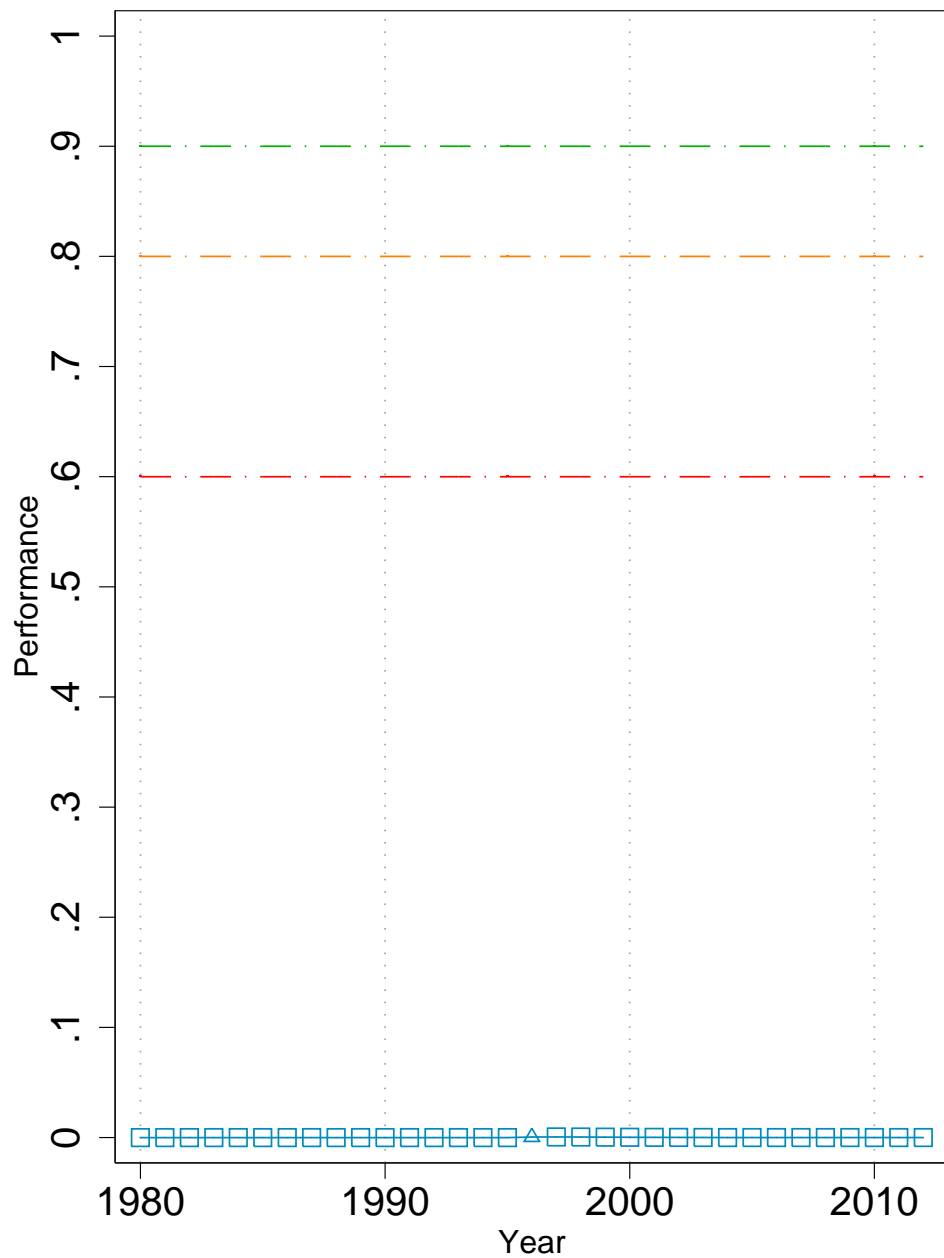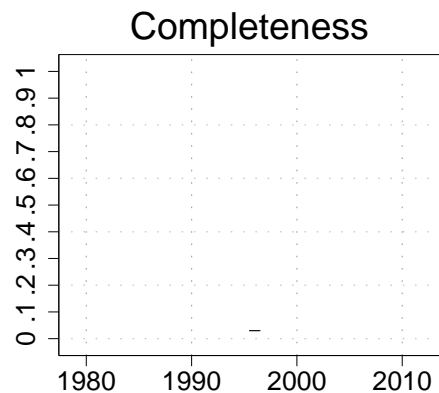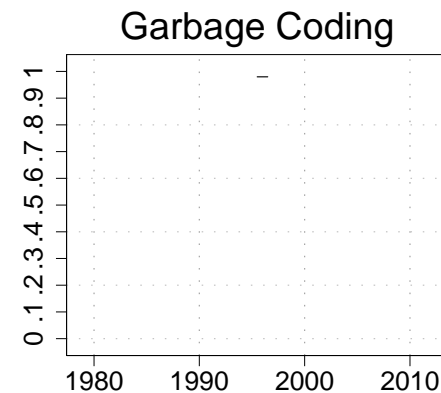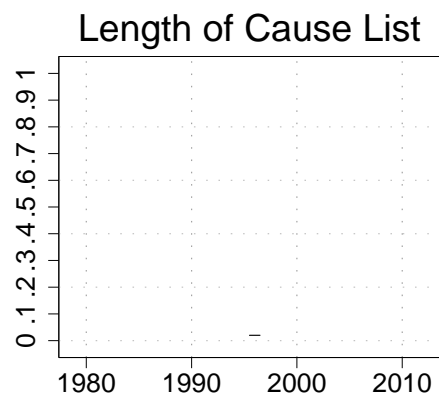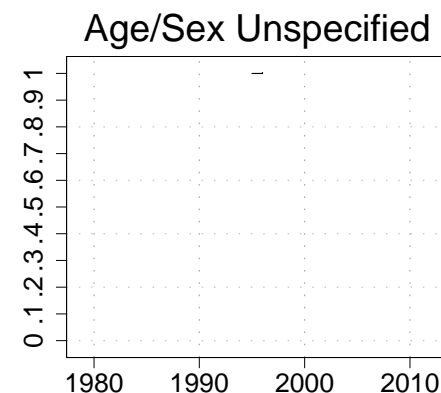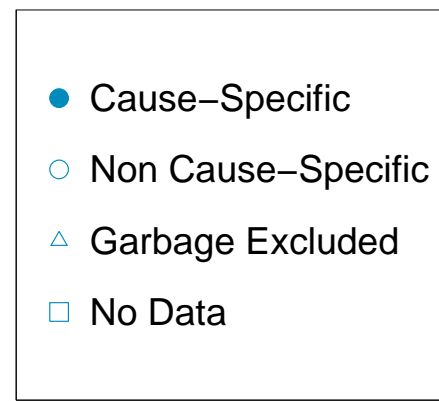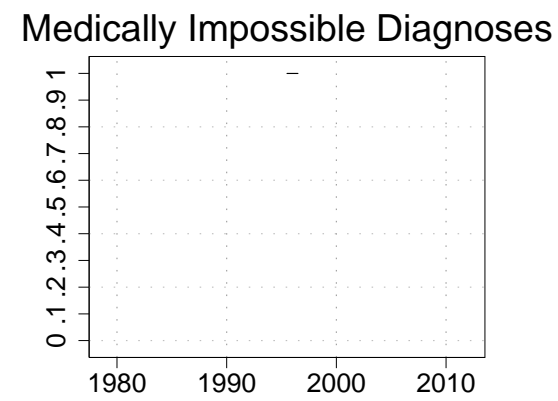

Indicators on their Original (Unweighted) Scale and Subtracted from One Where Necessary so Higher Scores are Preferable to Lower

# Barbados

## VS Performance Index

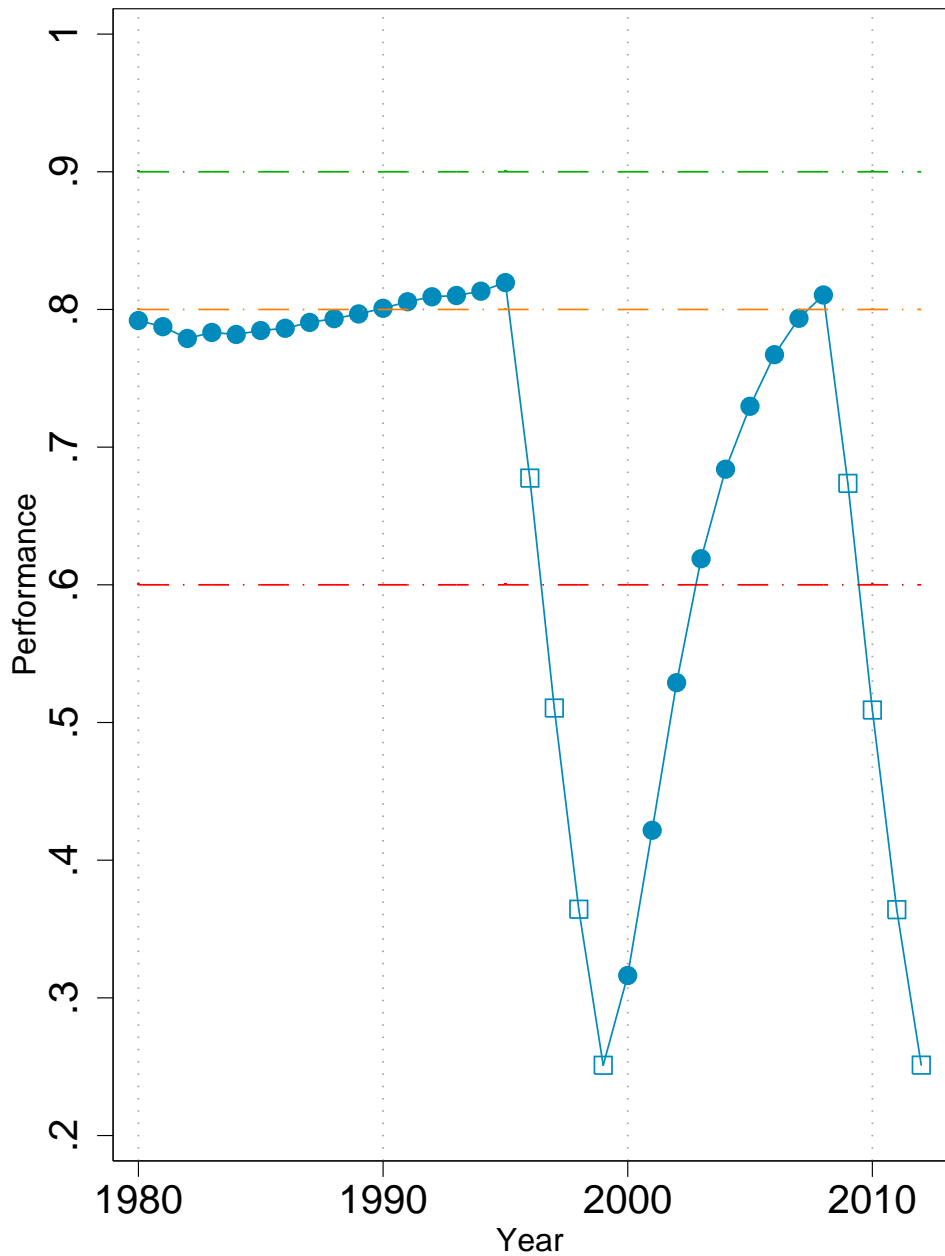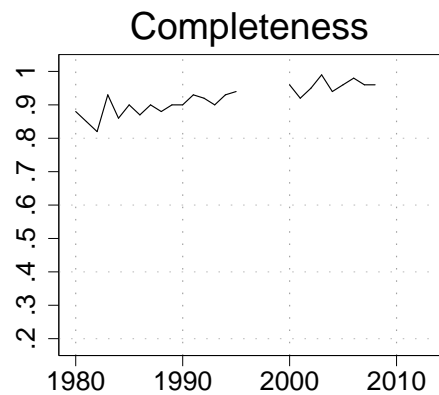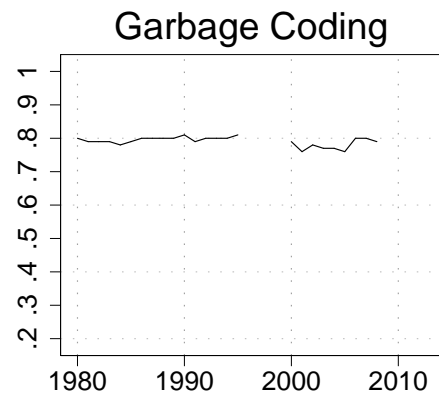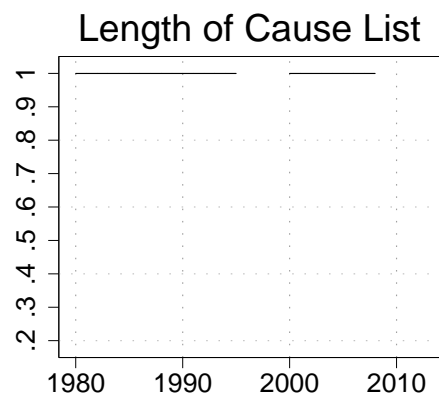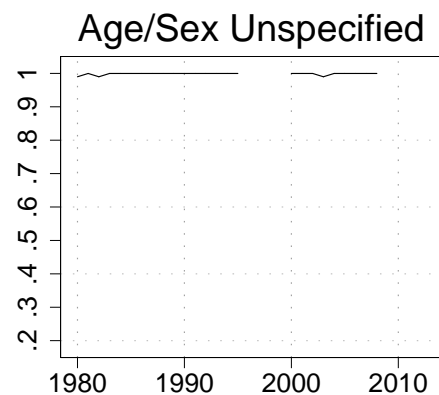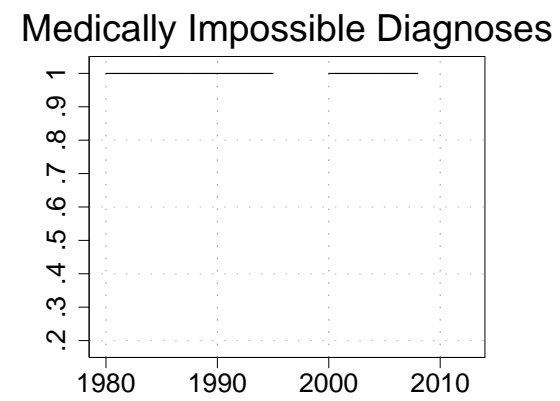

Indicators on their Original (Unweighted) Scale and Subtracted from One Where Necessary so Higher Scores are Preferable to Lower

# Belarus

## VS Performance Index

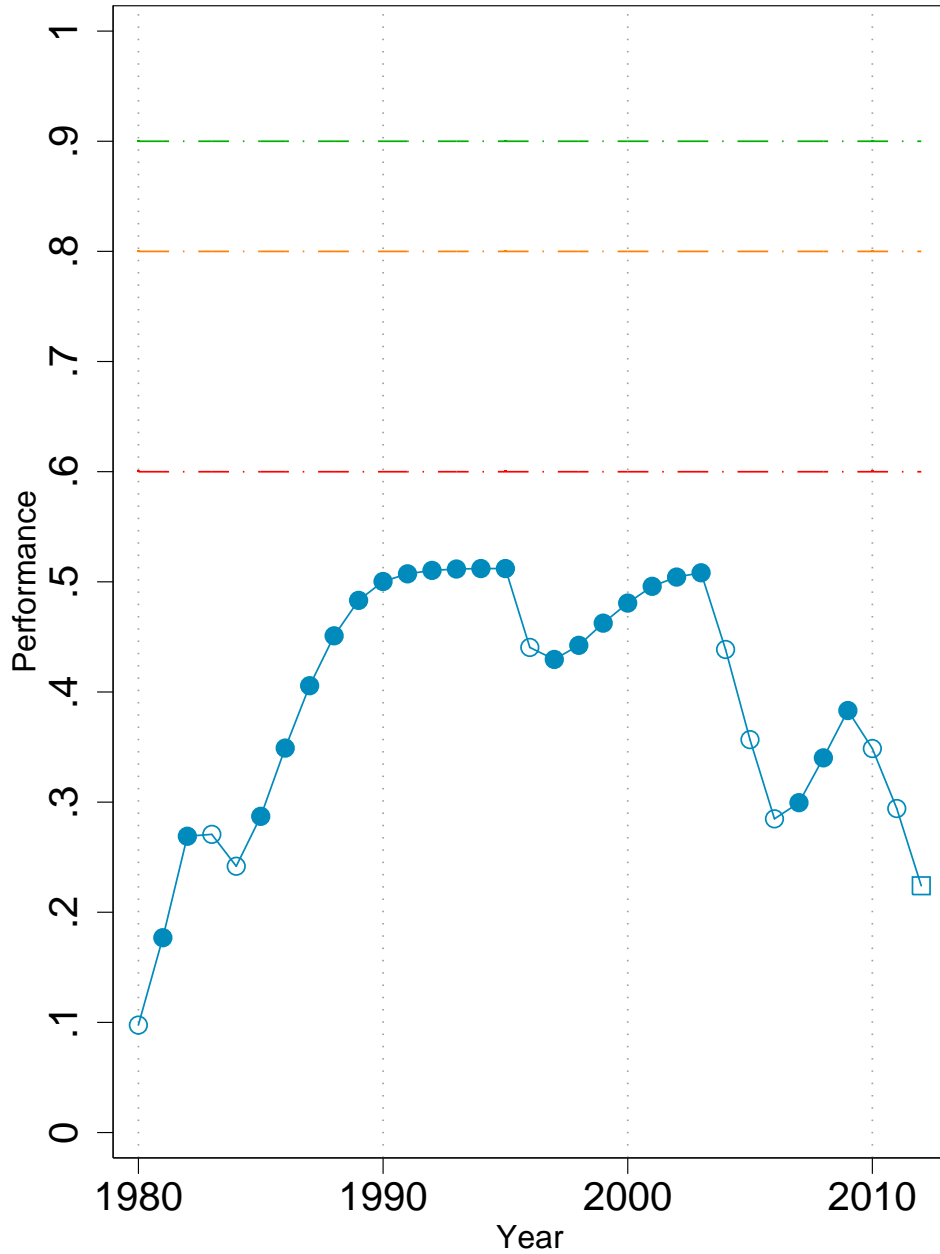

### Completeness

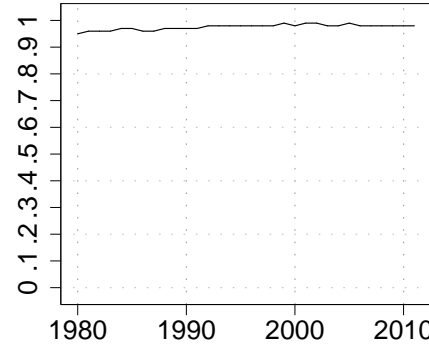

### Garbage Coding

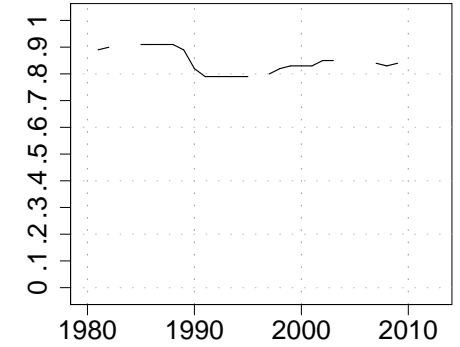

### Length of Cause List

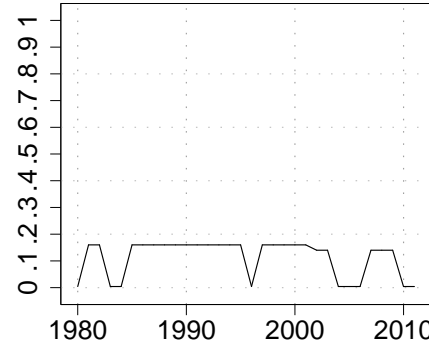

### Age/Sex Unspecified

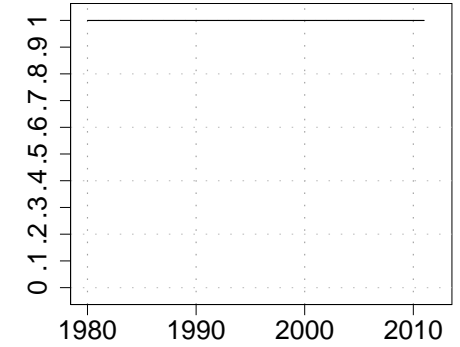

### Medically Impossible Diagnoses

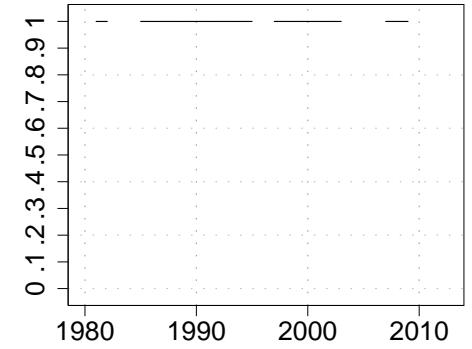

Indicators on their Original (Unweighted) Scale and Subtracted from One Where Necessary so Higher Scores are Preferable to Lower



# Belgium

## VS Performance Index

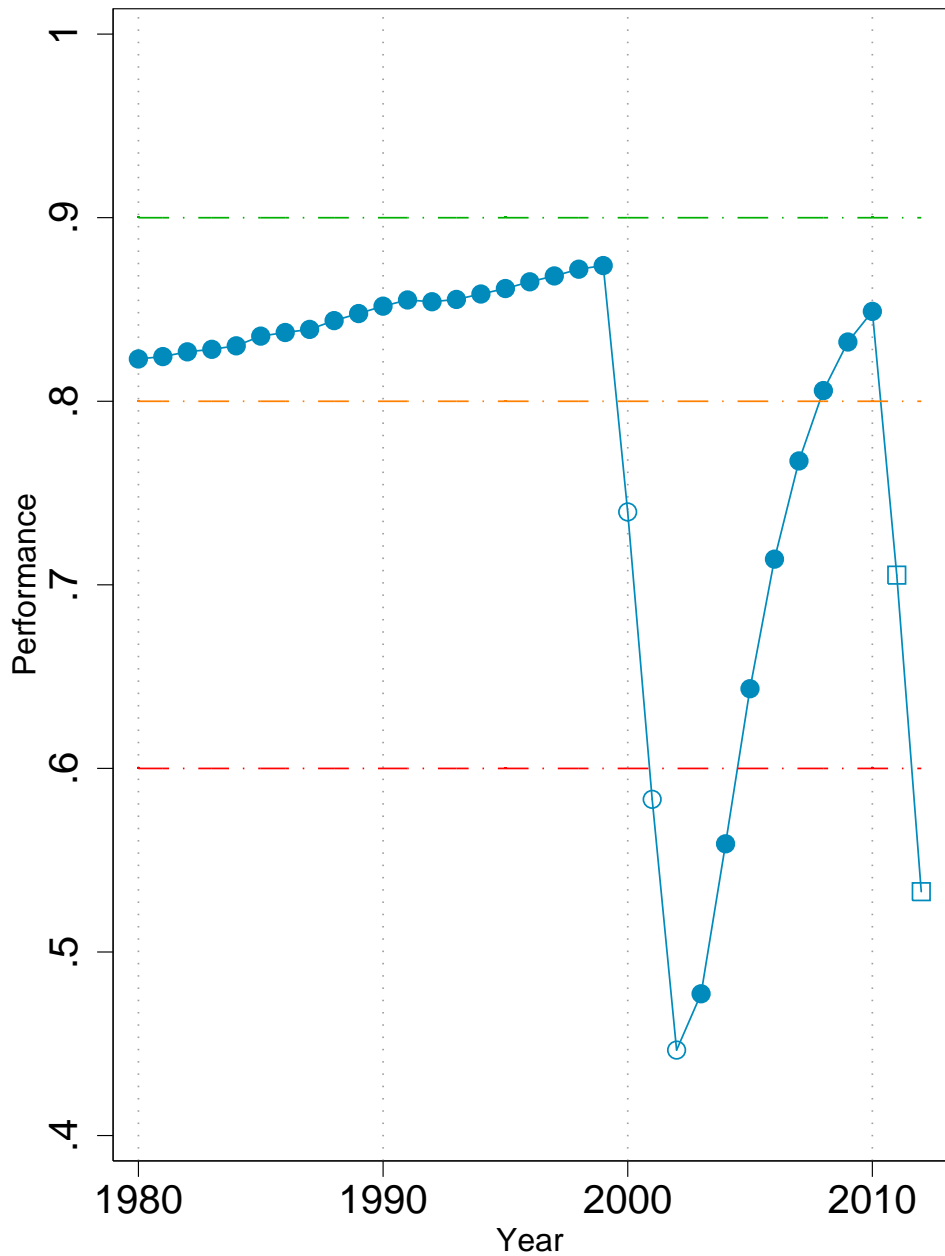

### Completeness

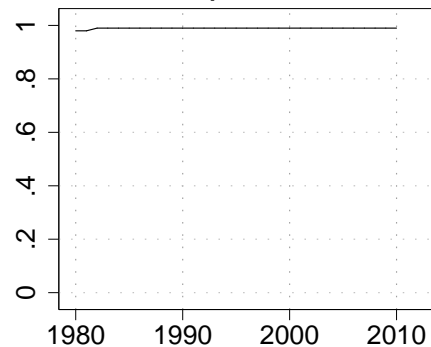

### Garbage Coding

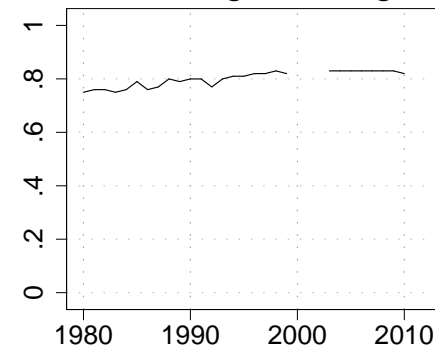

### Length of Cause List

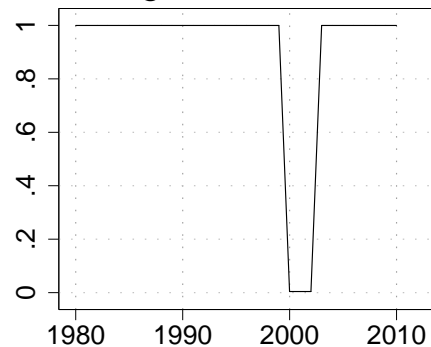

### Age/Sex Unspecified

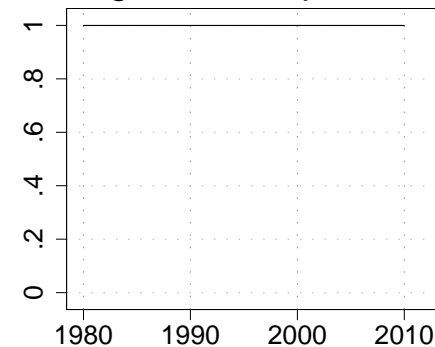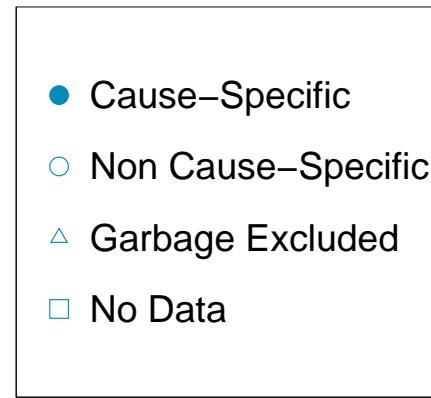

### Medically Impossible Diagnoses

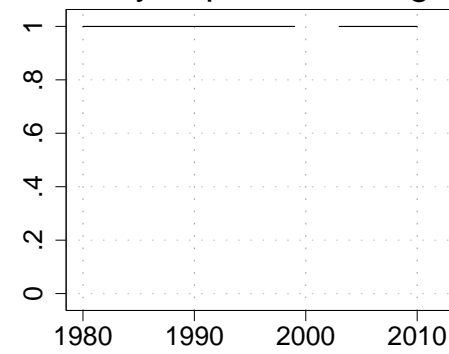

Indicators on their Original (Unweighted) Scale and Subtracted from One Where Necessary so Higher Scores are Preferable to Lower

# Belize

## VS Performance Index

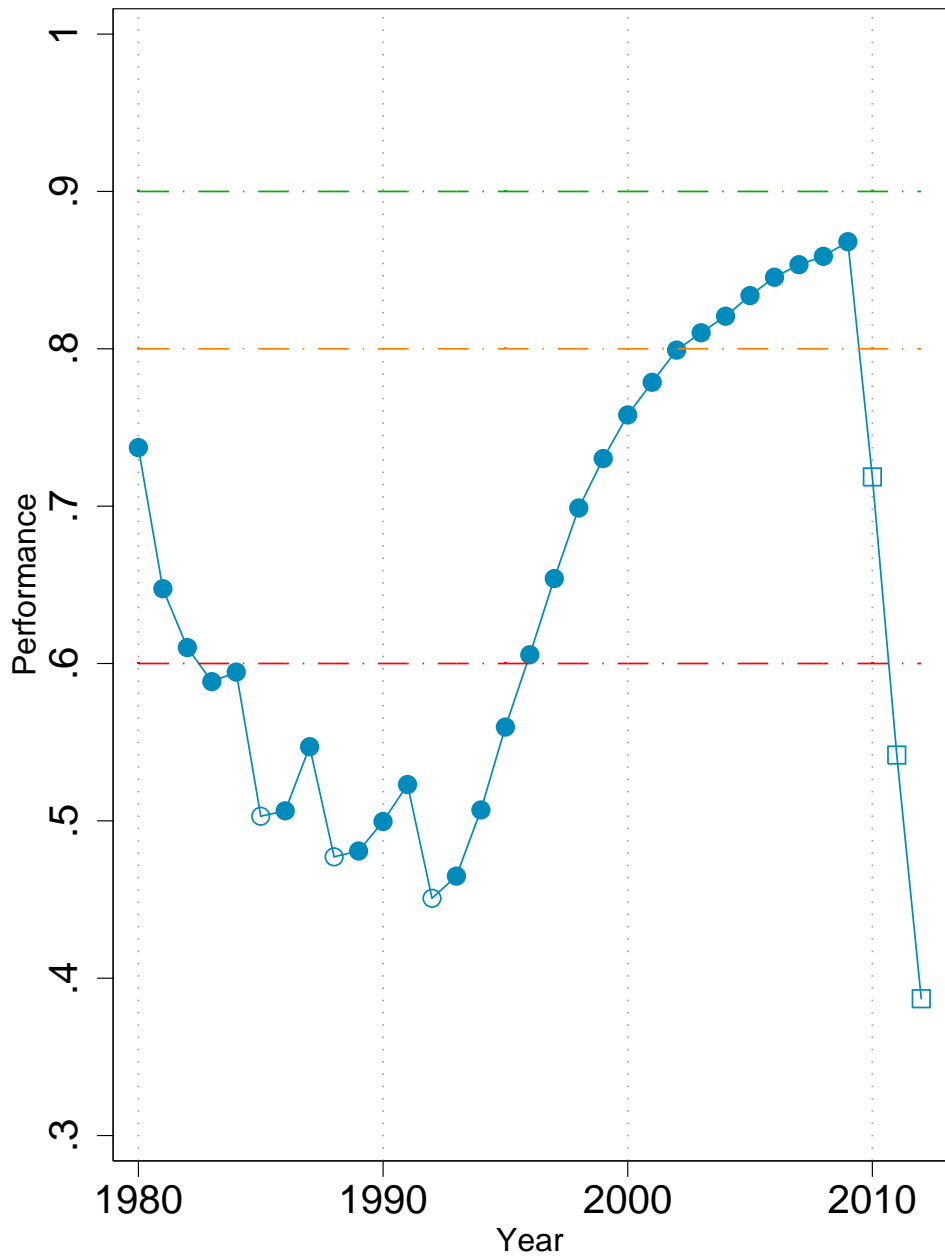

### Completeness

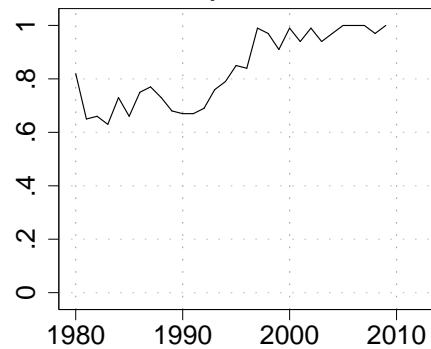

### Garbage Coding

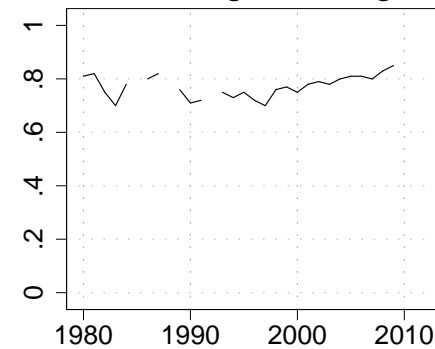

### Length of Cause List

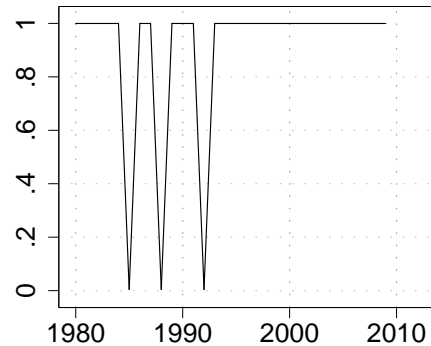

### Age/Sex Unspecified

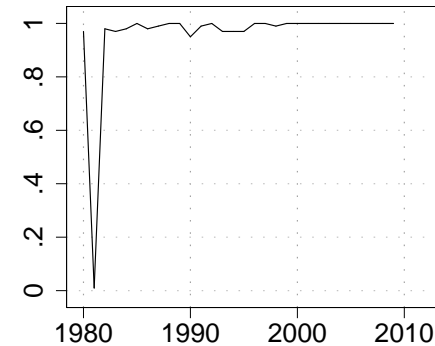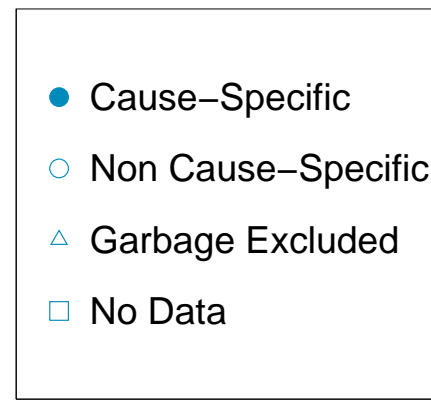

### Medically Impossible Diagnoses

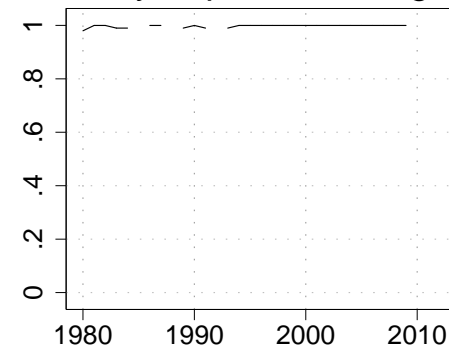

Indicators on their Original (Unweighted) Scale and Subtracted from One Where Necessary so Higher Scores are Preferable to Lower

# Benin

## VS Performance Index

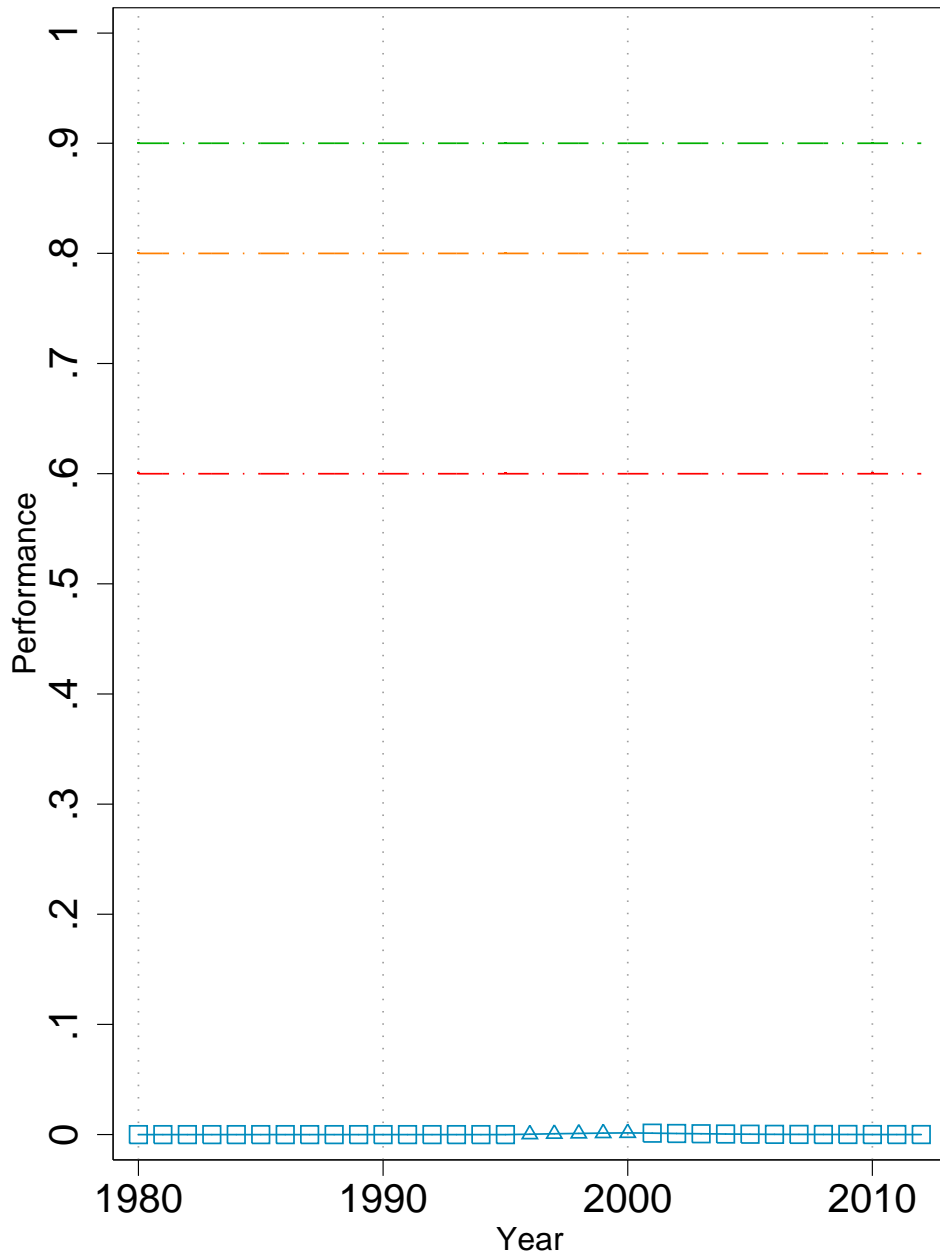

## Completeness

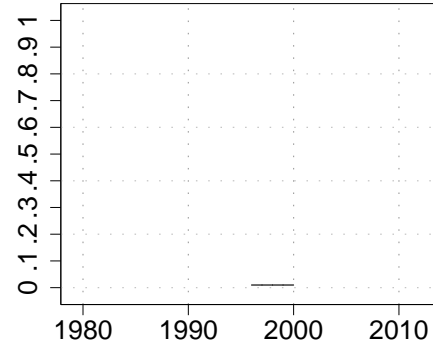

## Garbage Coding

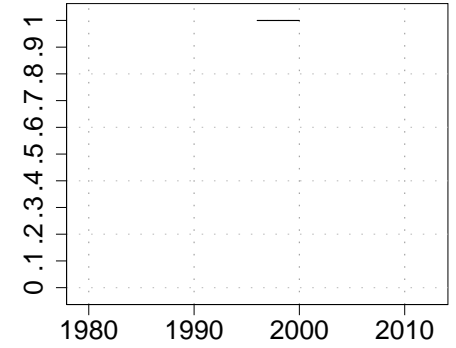

## Length of Cause List

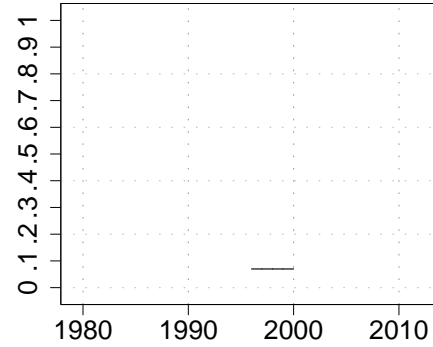

## Age/Sex Unspecified

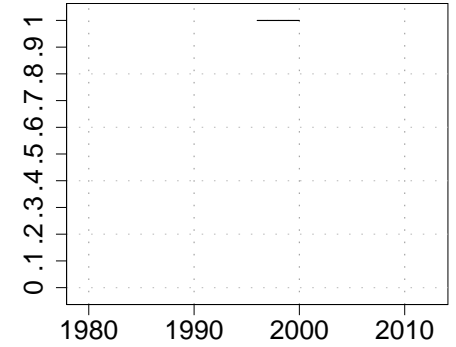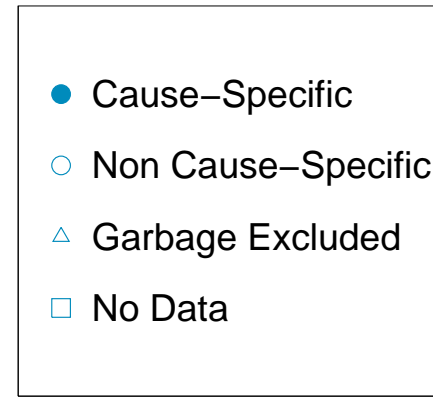

## Medically Impossible Diagnoses

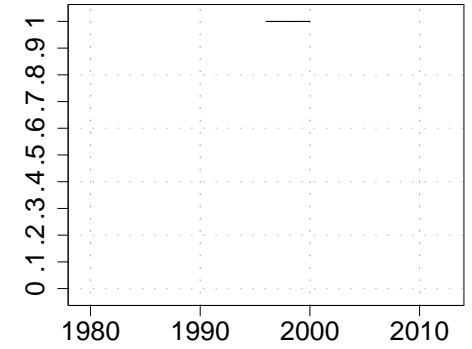

Indicators on their Original (Unweighted) Scale and Subtracted from One Where Necessary so Higher Scores are Preferable to Lower

# Bermuda

## VS Performance Index

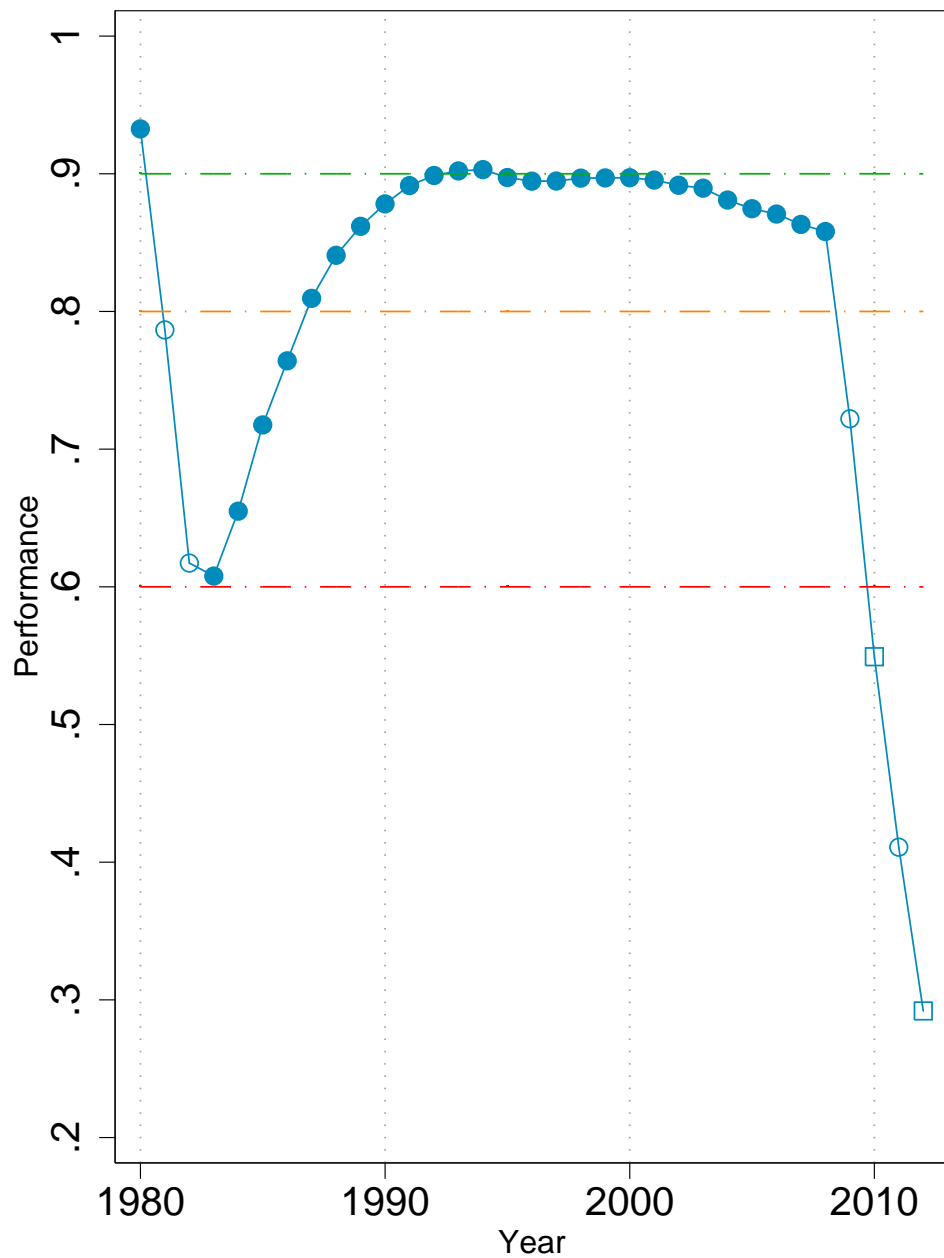

### Completeness

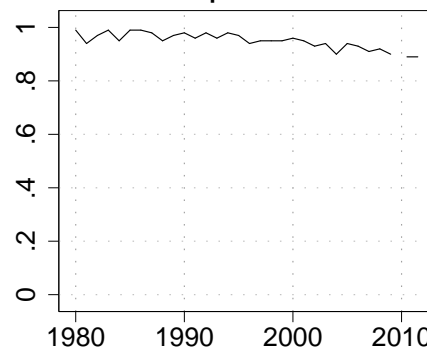

### Garbage Coding

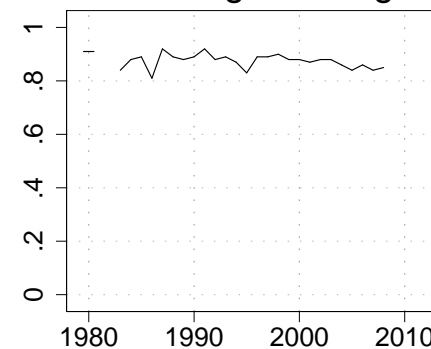

### Length of Cause List

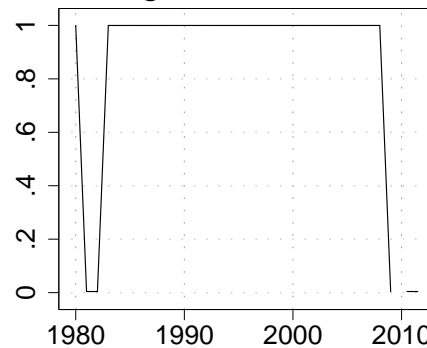

### Age/Sex Unspecified

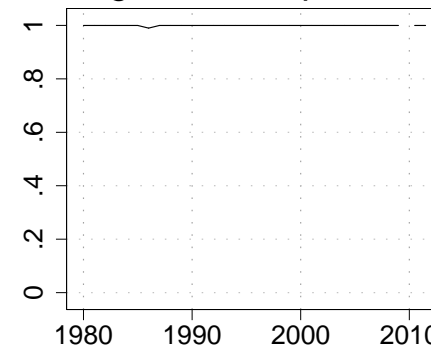

### Medically Impossible Diagnoses

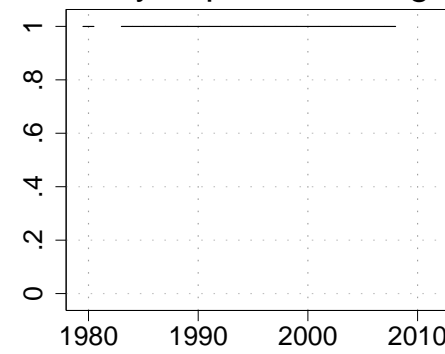

Indicators on their Original (Unweighted) Scale and Subtracted from One Where Necessary so Higher Scores are Preferable to Lower

# Bhutan

## VS Performance Index

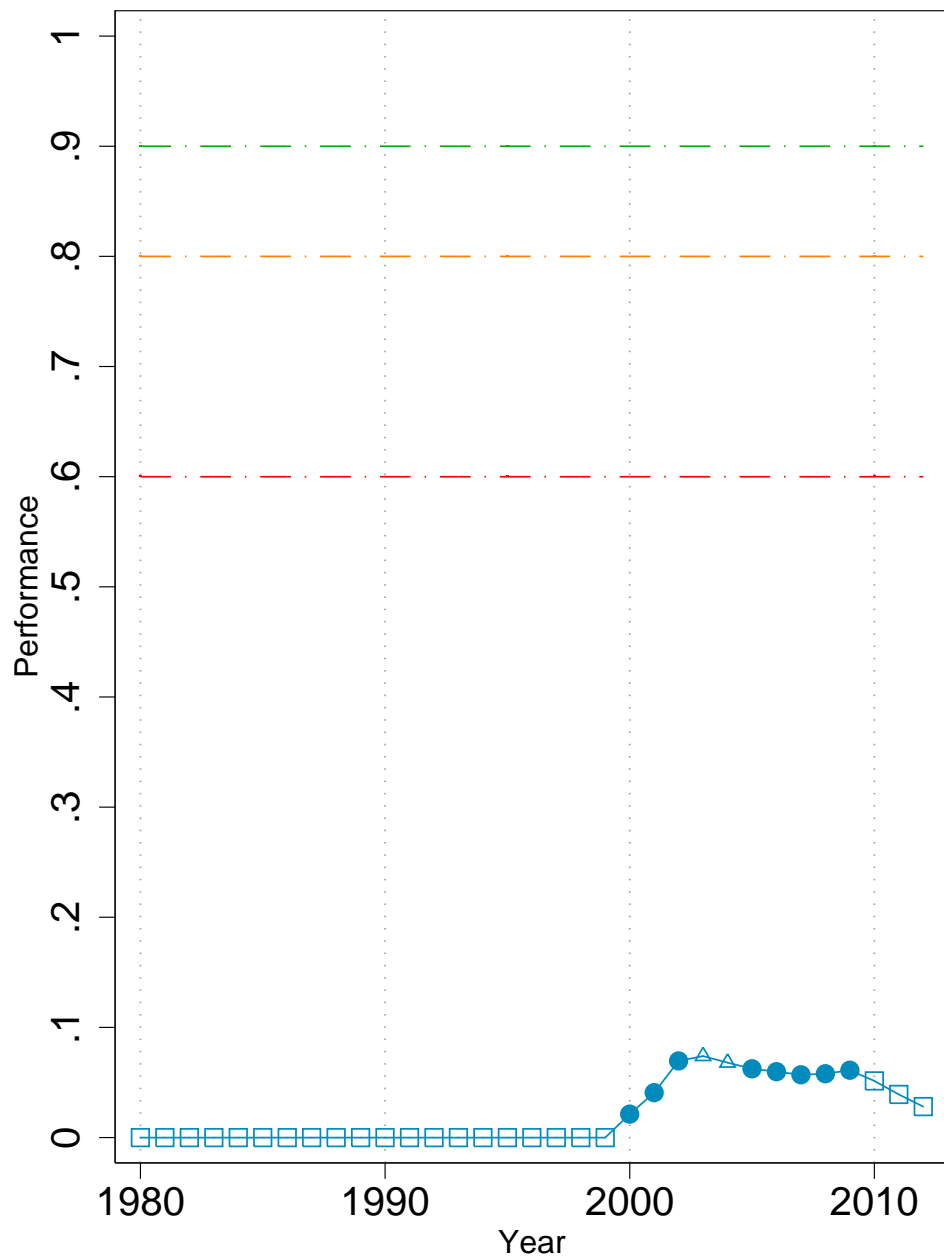

### Completeness

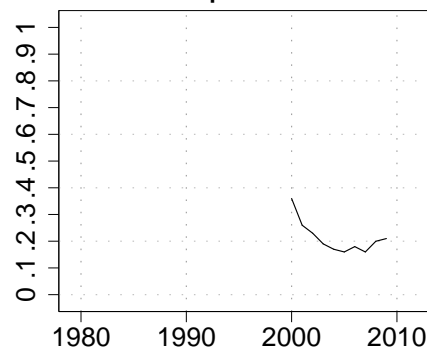

### Garbage Coding

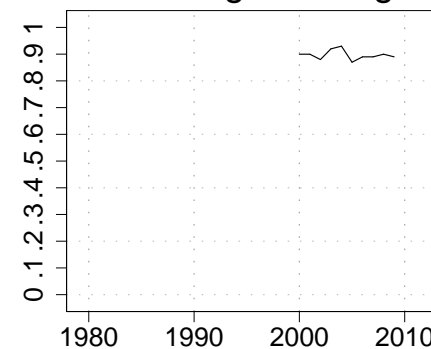

### Length of Cause List

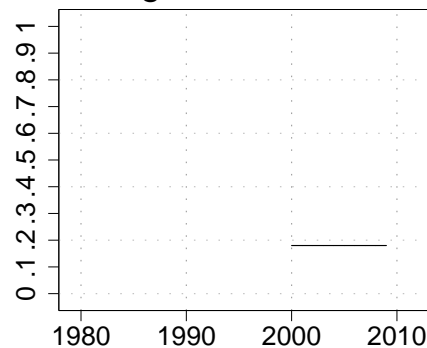

### Age/Sex Unspecified

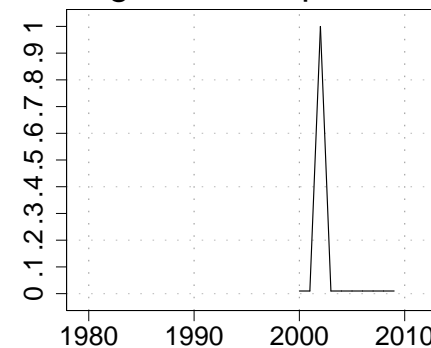

### Medically Impossible Diagnoses

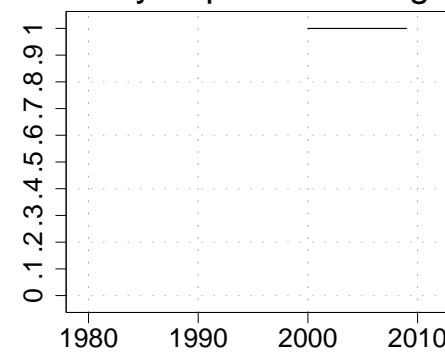

Indicators on their Original (Unweighted) Scale and Subtracted from One Where Necessary so Higher Scores are Preferable to Lower

# Bolivia

## VS Performance Index

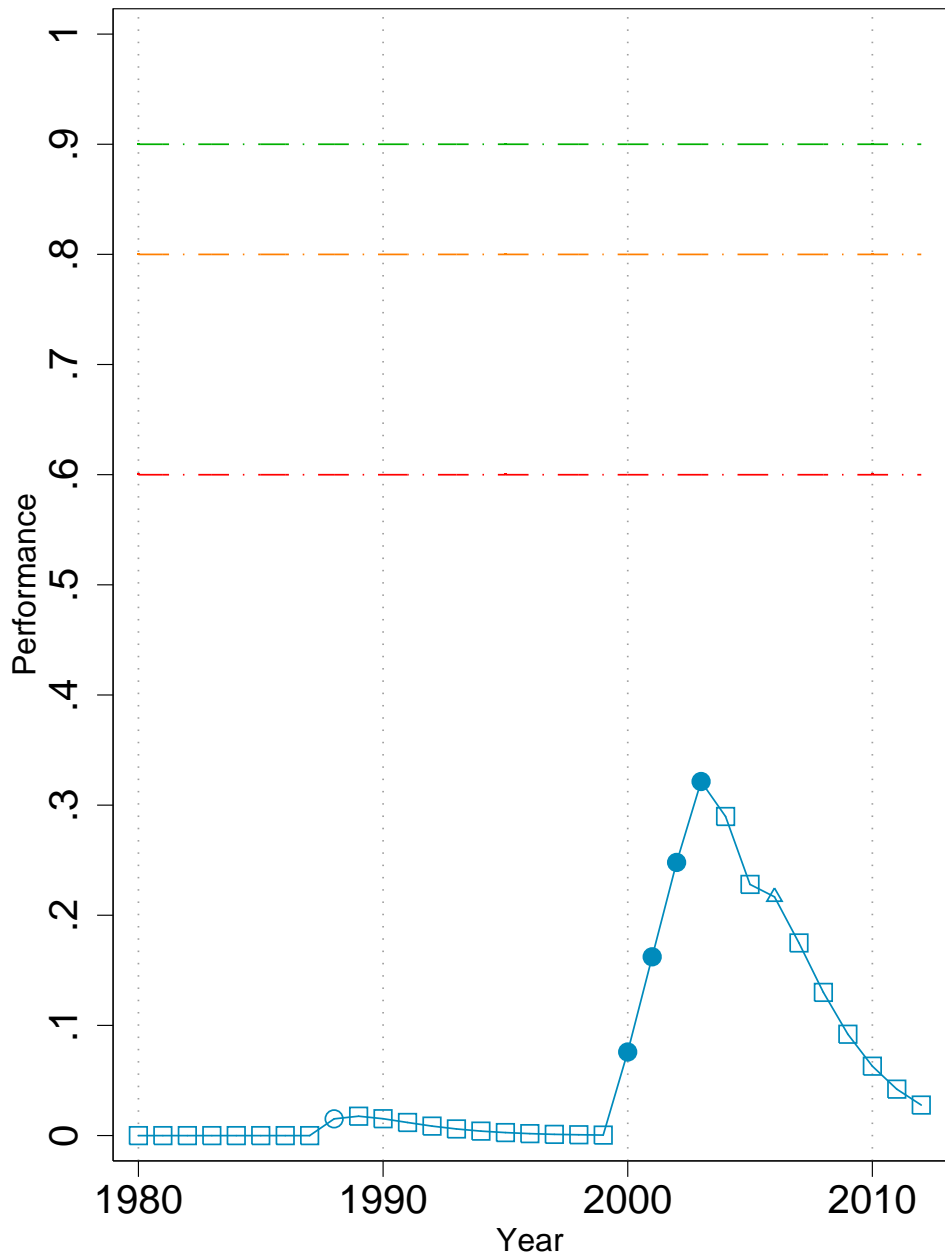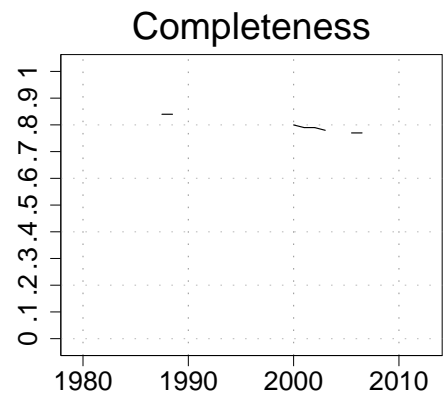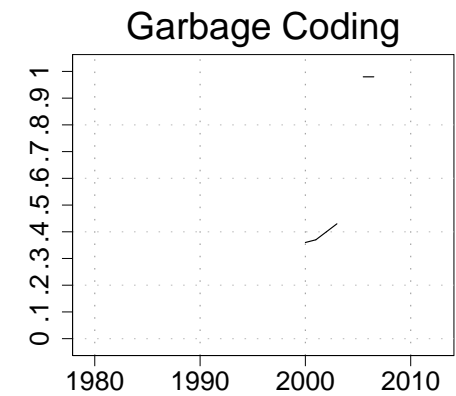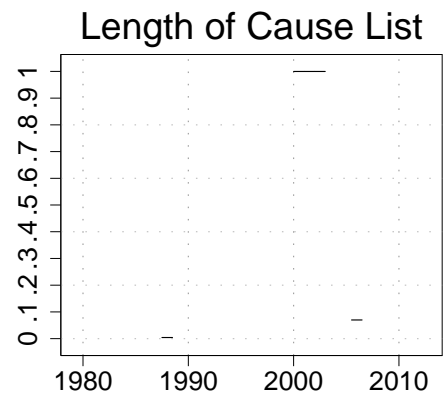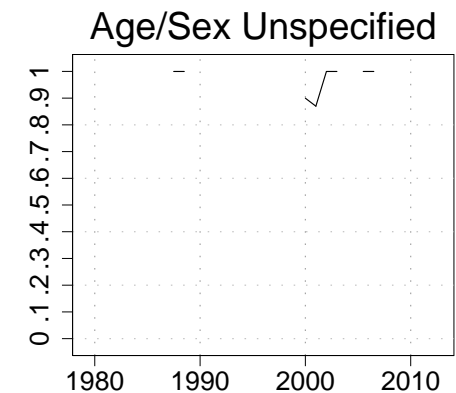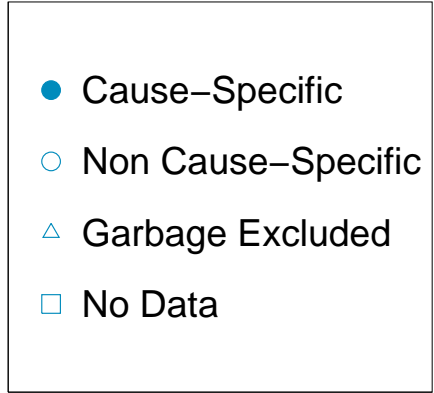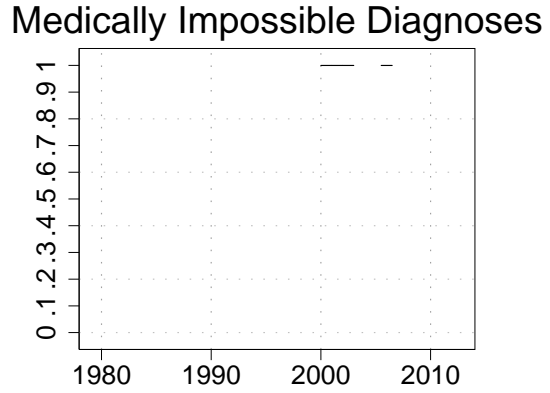

Indicators on their Original (Unweighted) Scale and Subtracted from One Where Necessary so Higher Scores are Preferable to Lower

# Bosnia and Herzegovina

## VS Performance Index

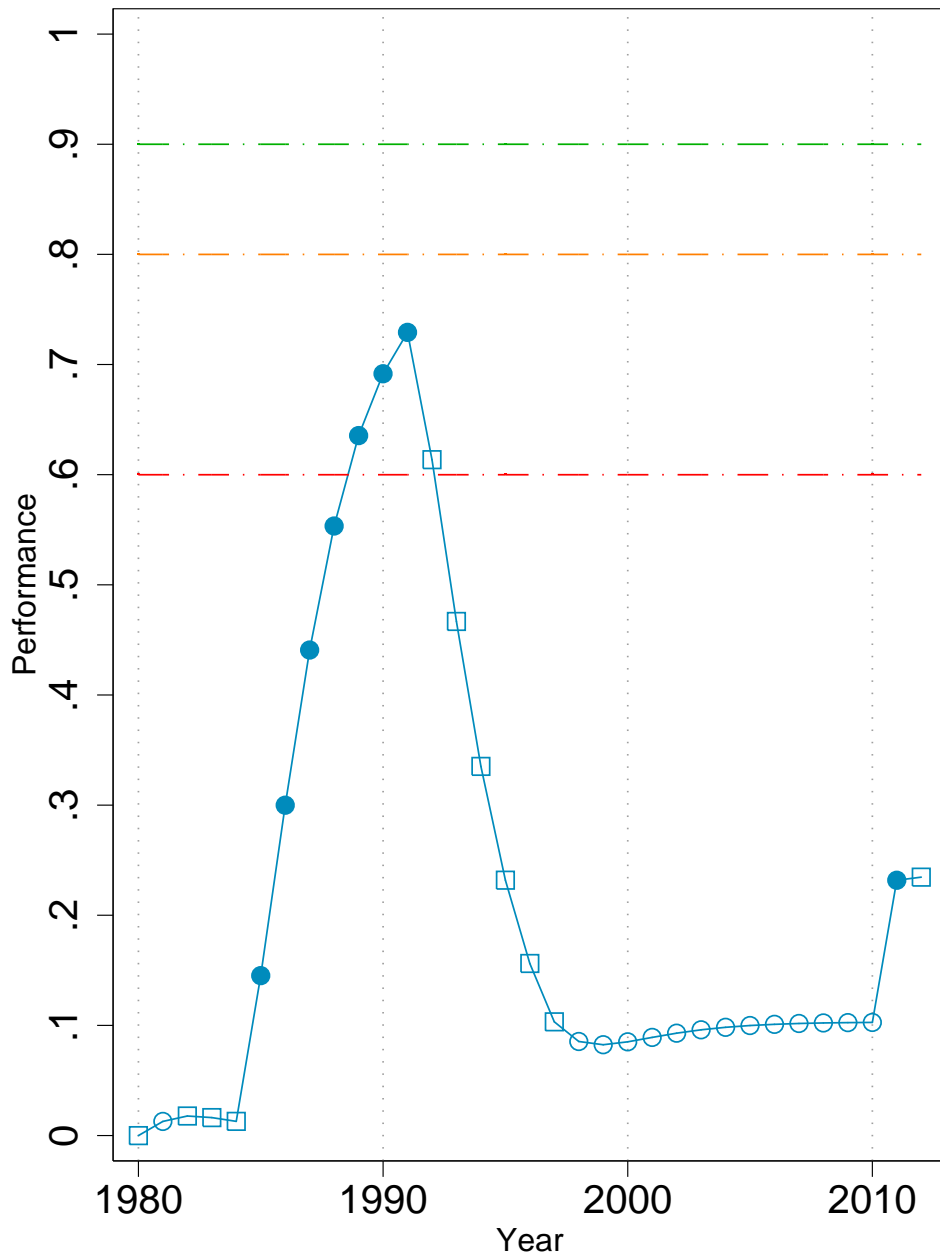

### Completeness

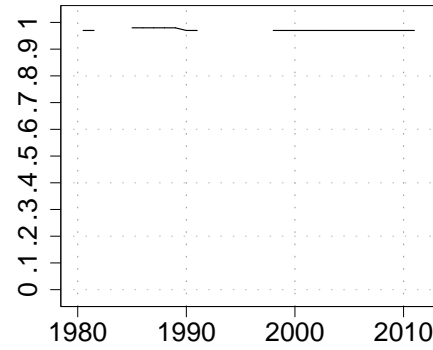

### Garbage Coding

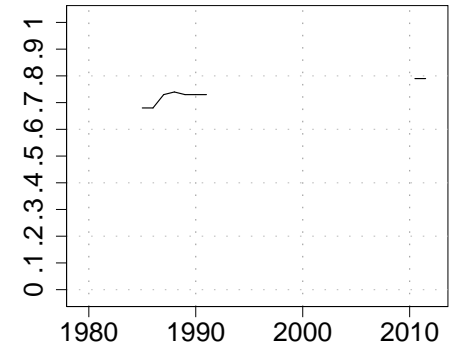

### Length of Cause List

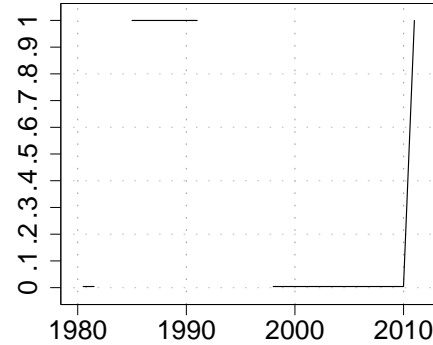

### Age/Sex Unspecified

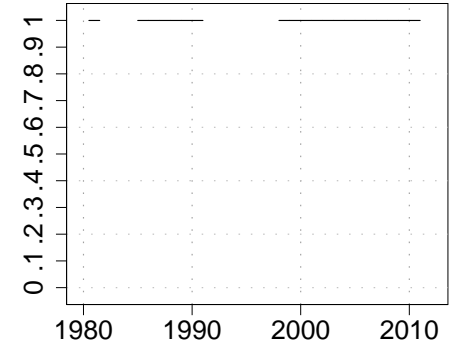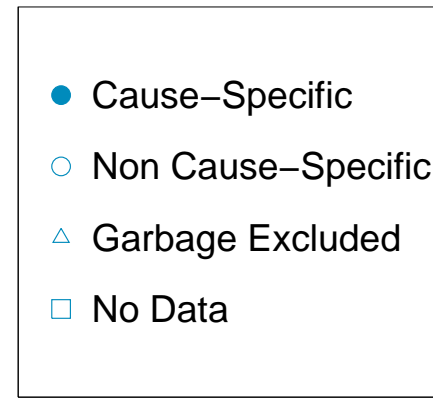

### Medically Impossible Diagnoses

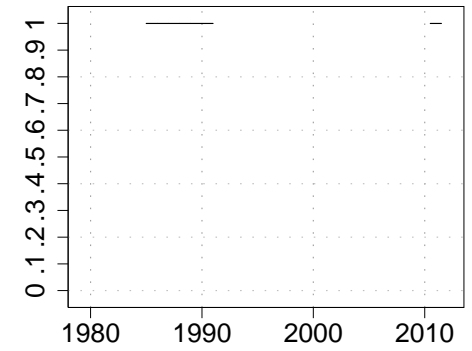

Indicators on their Original (Unweighted) Scale and Subtracted from One Where Necessary so Higher Scores are Preferable to Lower

# Botswana

## VS Performance Index

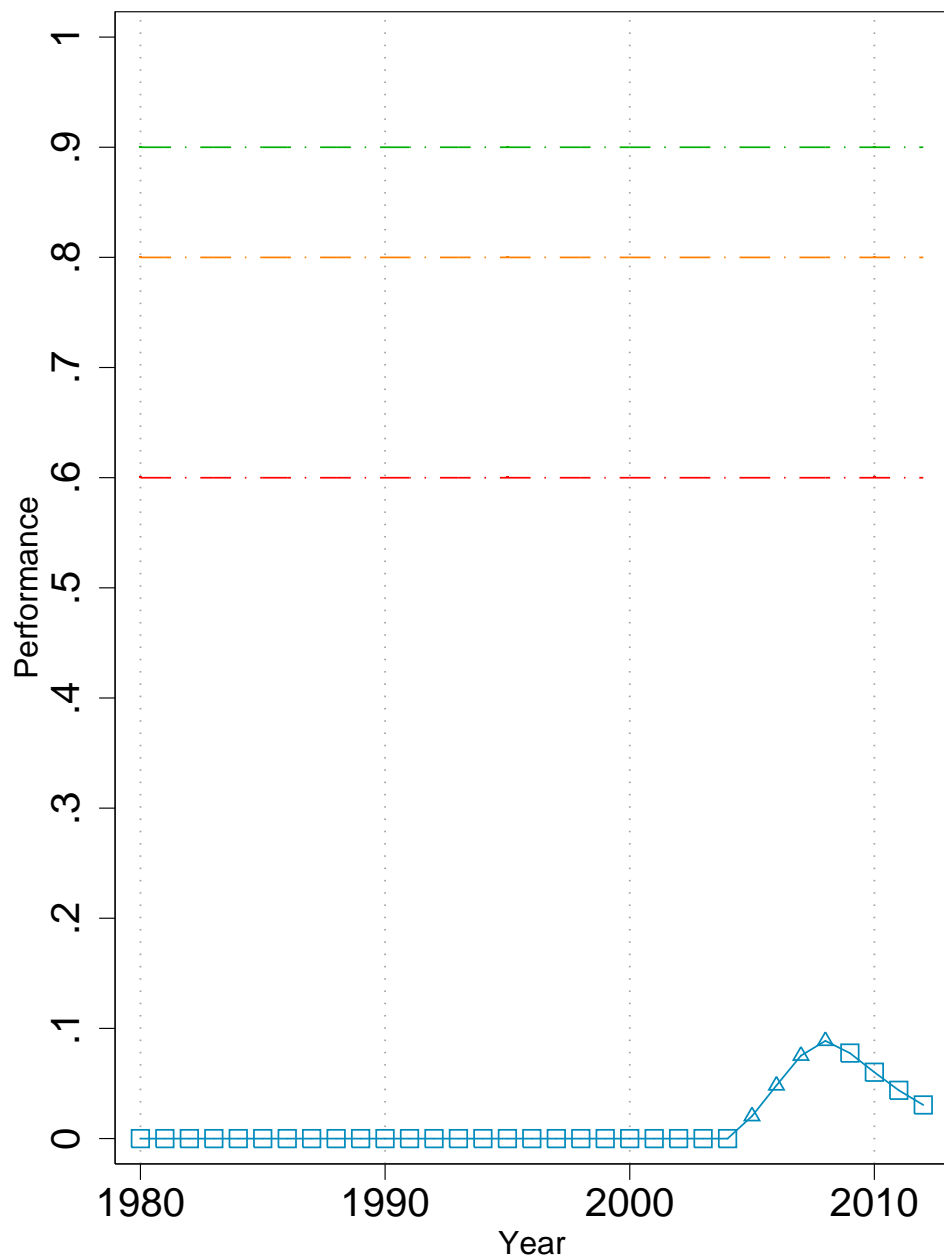

### Completeness

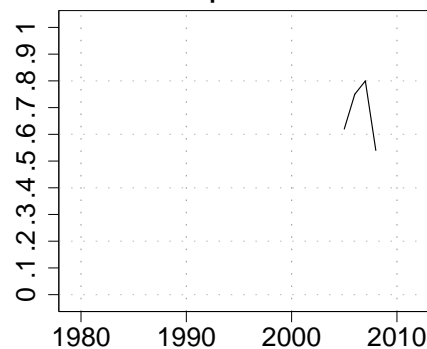

### Garbage Coding

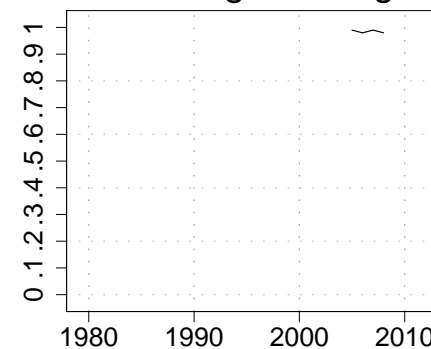

### Length of Cause List

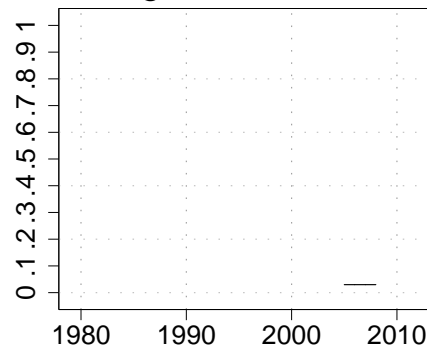

### Age/Sex Unspecified

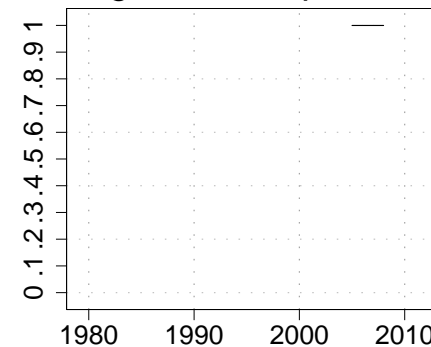

### Medically Impossible Diagnoses

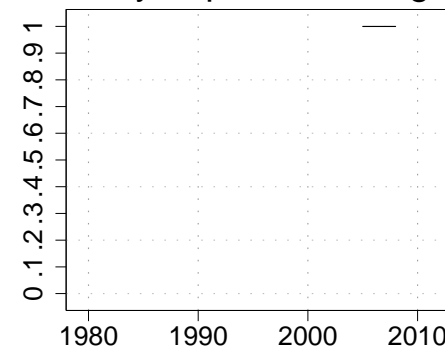

Indicators on their Original (Unweighted) Scale and Subtracted from One Where Necessary so Higher Scores are Preferable to Lower



# Brazil

## VS Performance Index

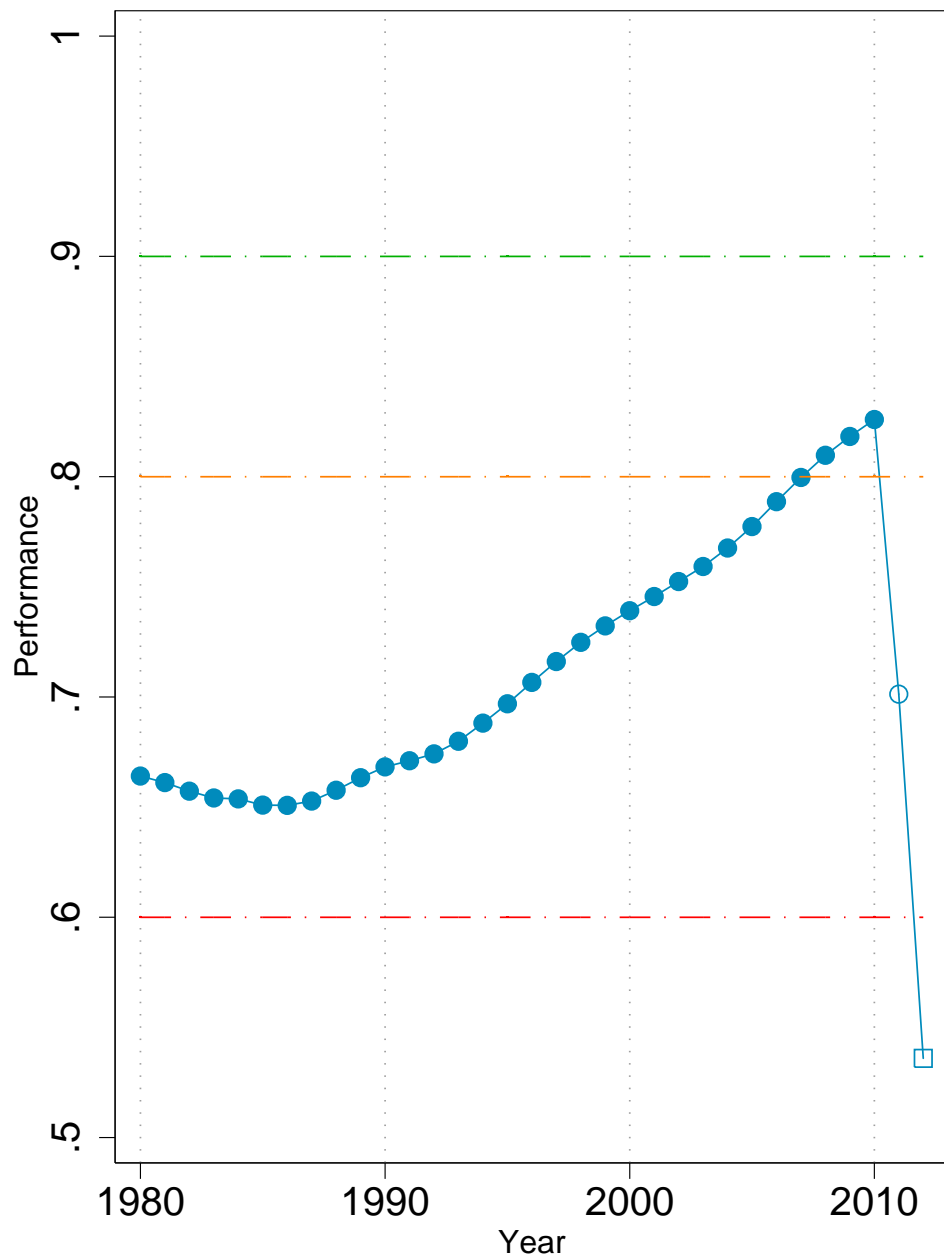

## Completeness

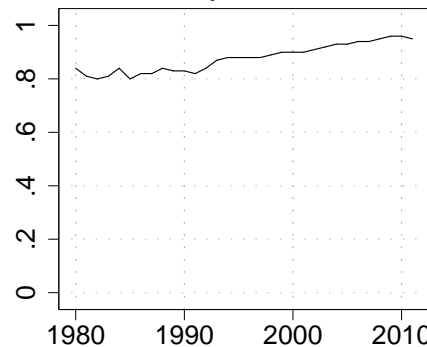

## Garbage Coding

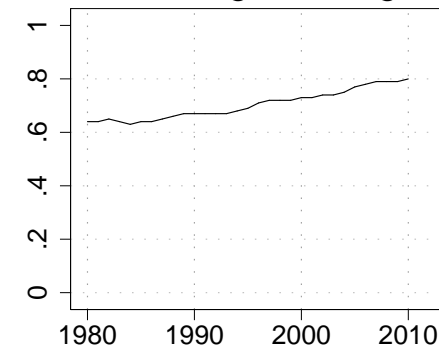

## Length of Cause List

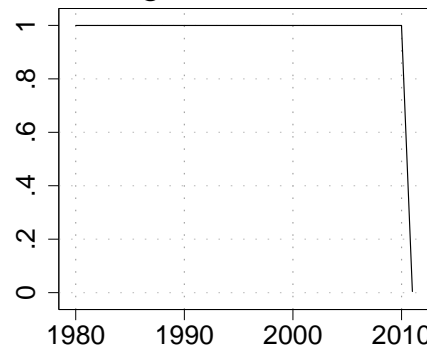

## Age/Sex Unspecified

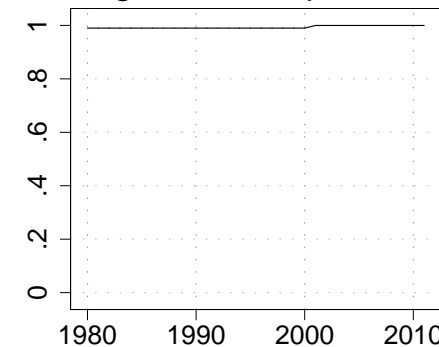

## Medically Impossible Diagnoses

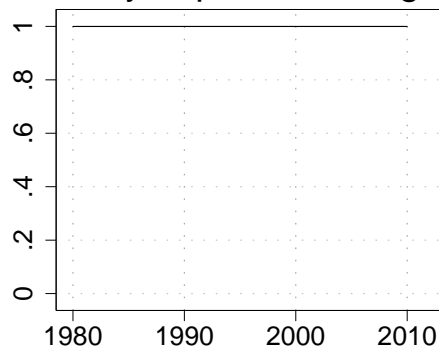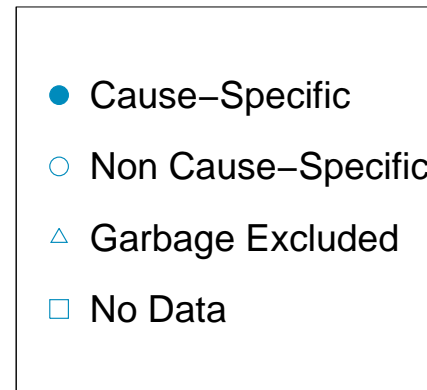

Indicators on their Original (Unweighted) Scale and Subtracted from One Where Necessary so Higher Scores are Preferable to Lower

# Brunei Darussalam

## VS Performance Index

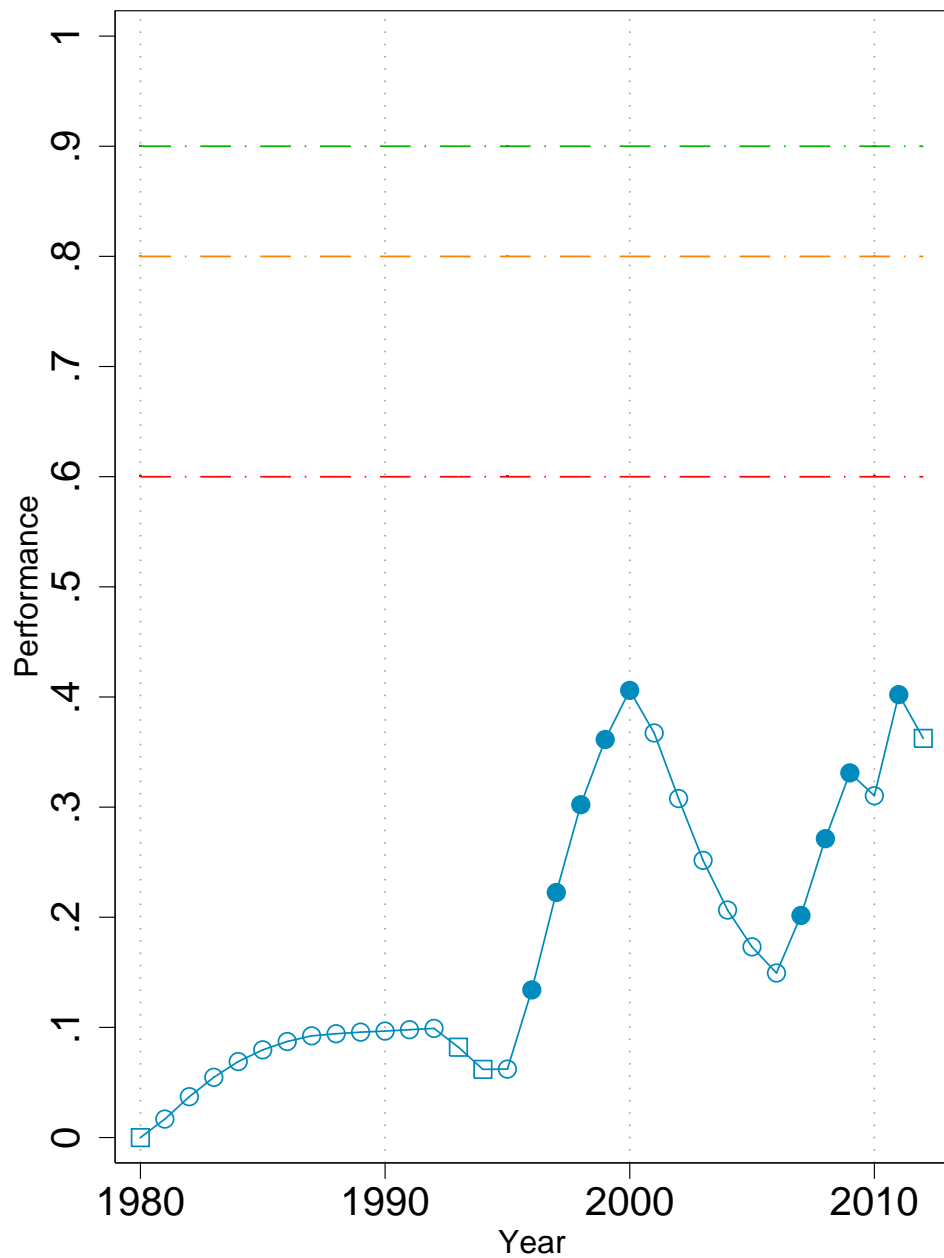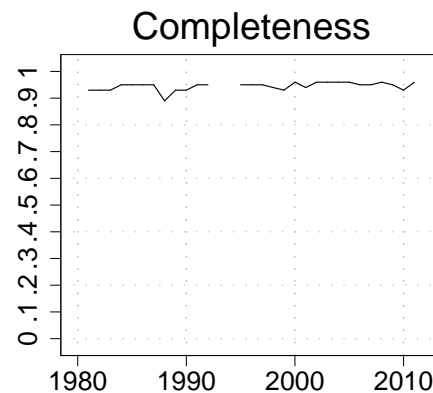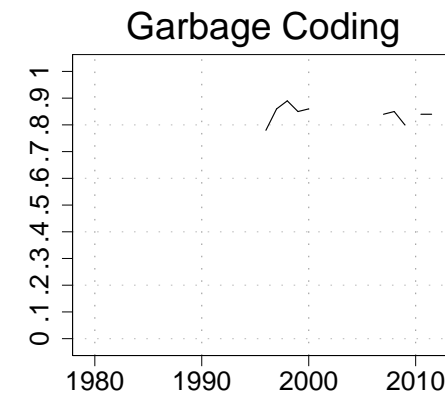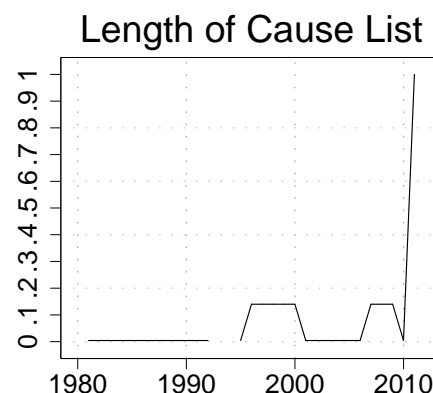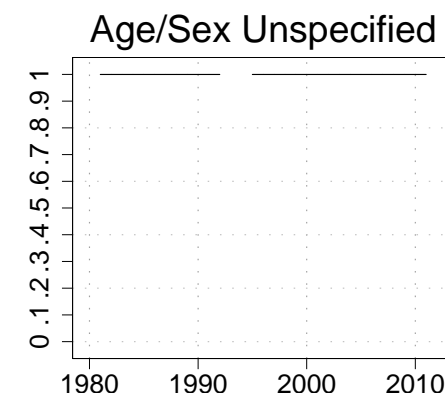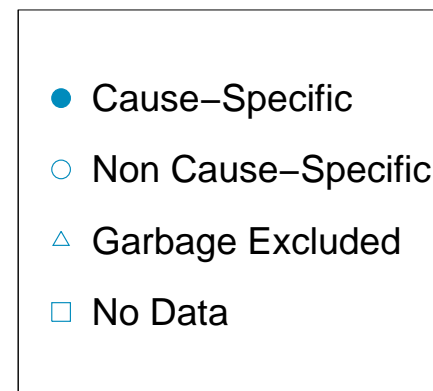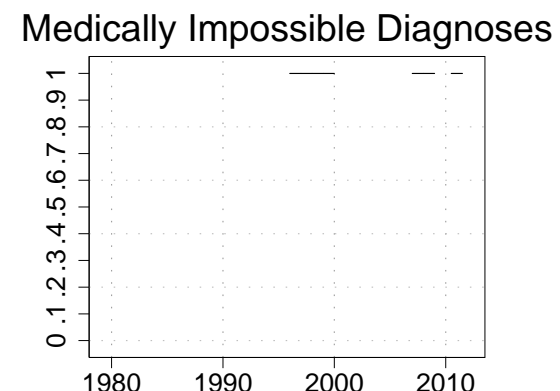

Indicators on their Original (Unweighted) Scale and Subtracted from One Where Necessary so Higher Scores are Preferable to Lower

# Bulgaria

## VS Performance Index

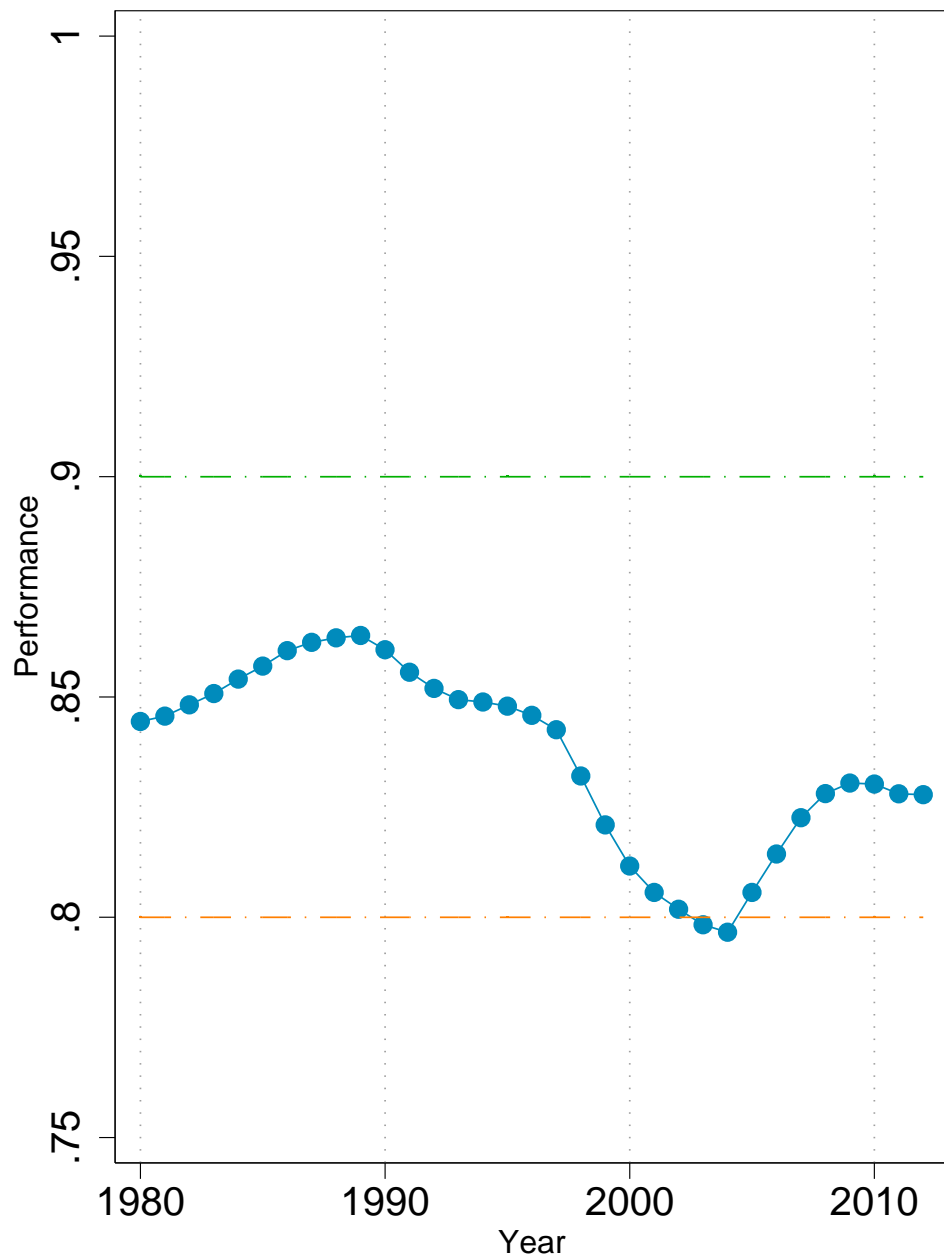

### Completeness

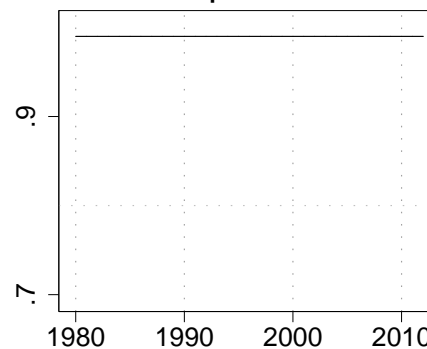

### Garbage Coding

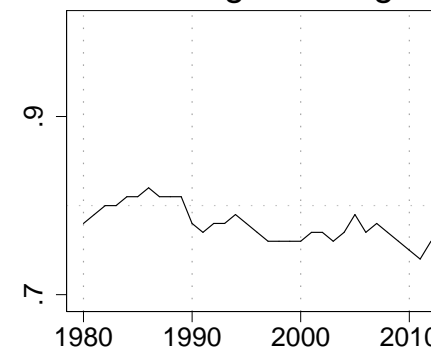

### Length of Cause List

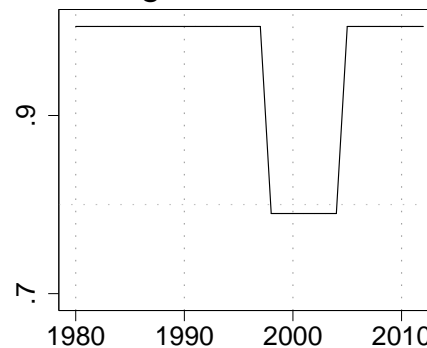

### Age/Sex Unspecified

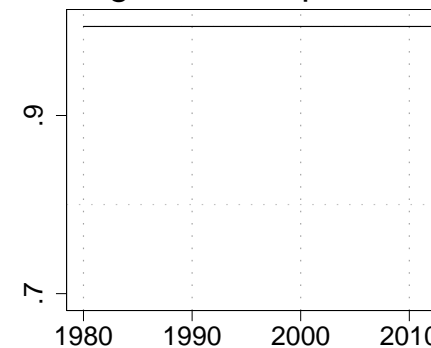

### Medically Impossible Diagnoses

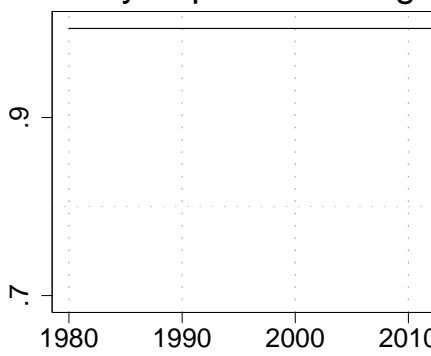

Indicators on their Original (Unweighted) Scale and Subtracted from One Where Necessary so Higher Scores are Preferable to Lower

# Canada

## VS Performance Index

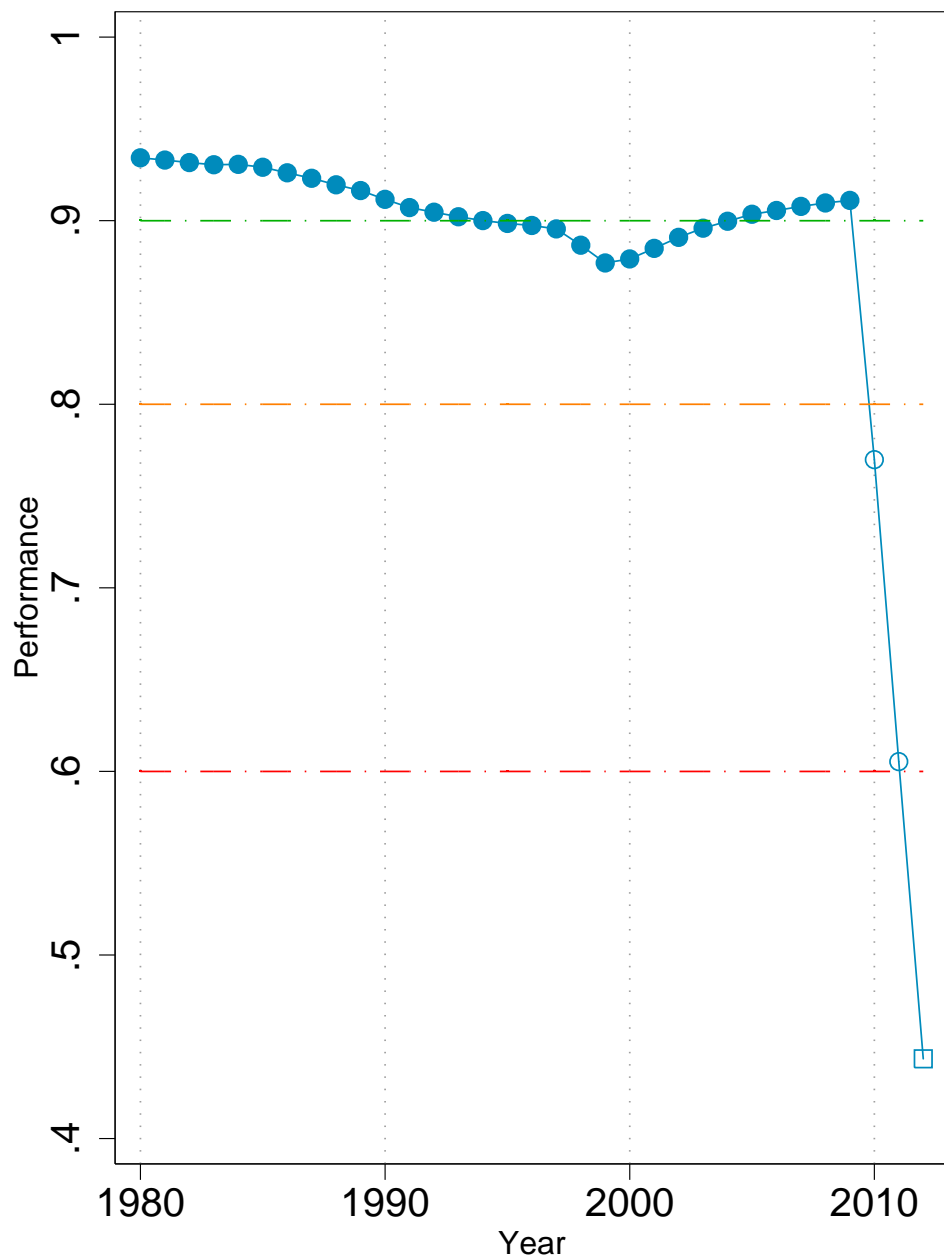

### Completeness

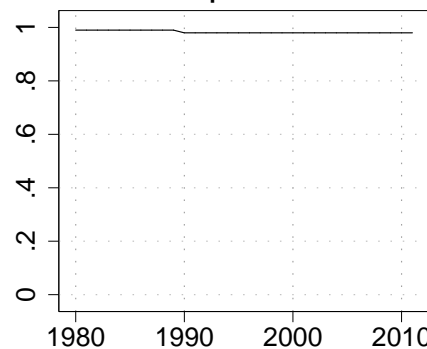

### Garbage Coding

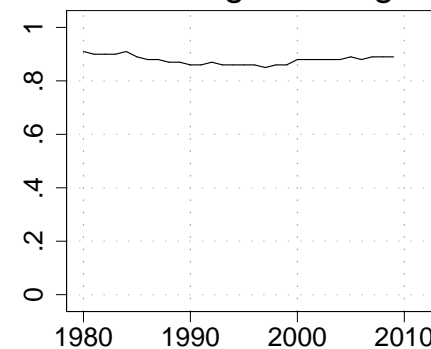

### Length of Cause List

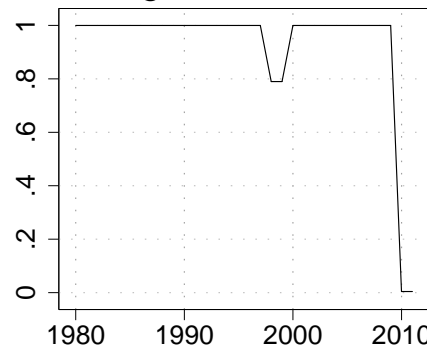

### Age/Sex Unspecified

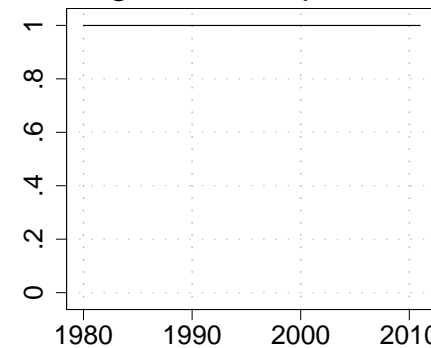

### Medically Impossible Diagnoses

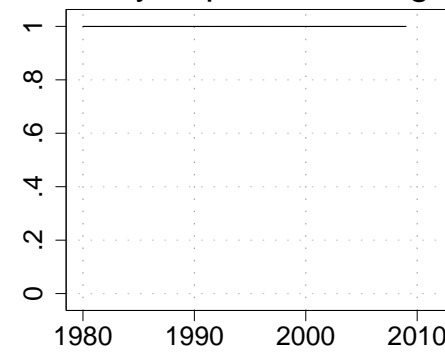

Indicators on their Original (Unweighted) Scale and Subtracted from One Where Necessary so Higher Scores are Preferable to Lower

# Cape Verde

## VS Performance Index

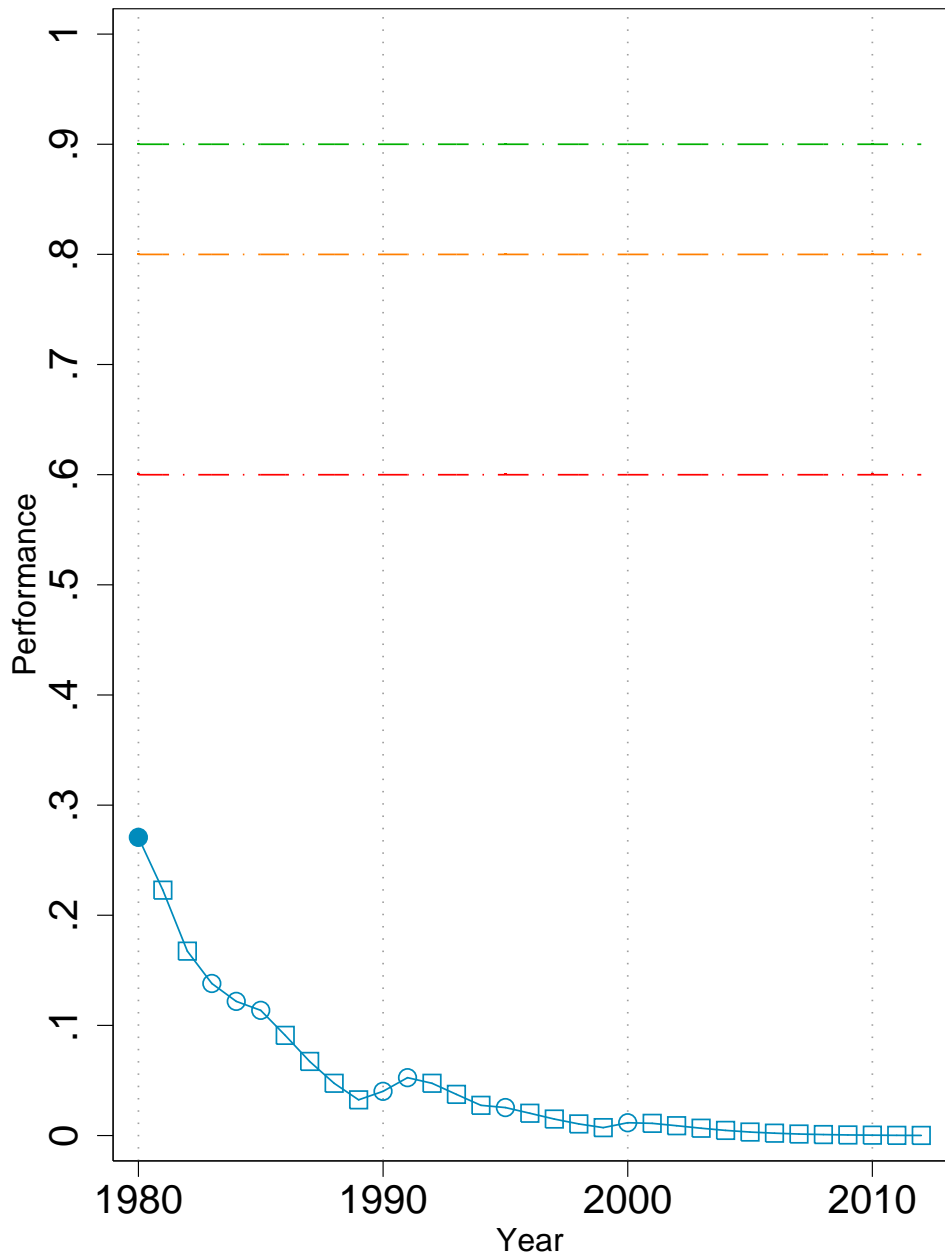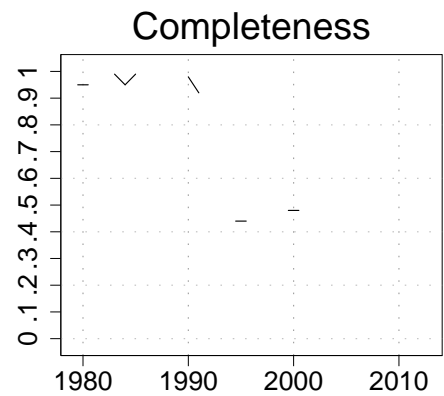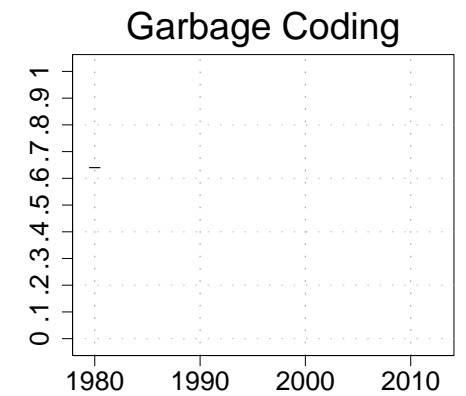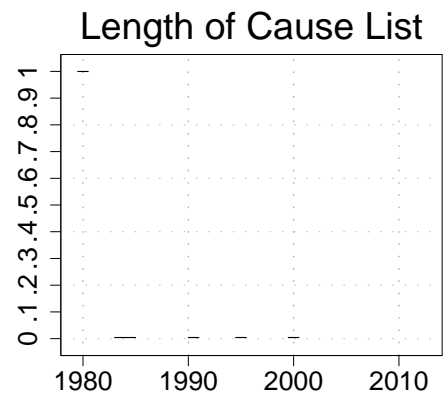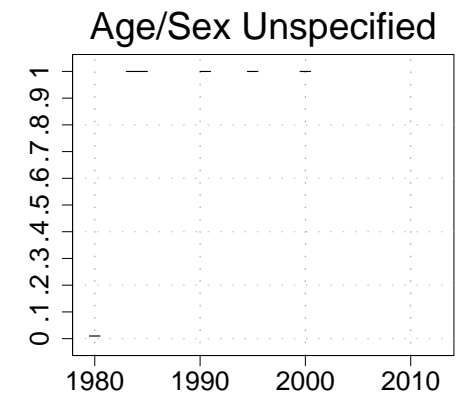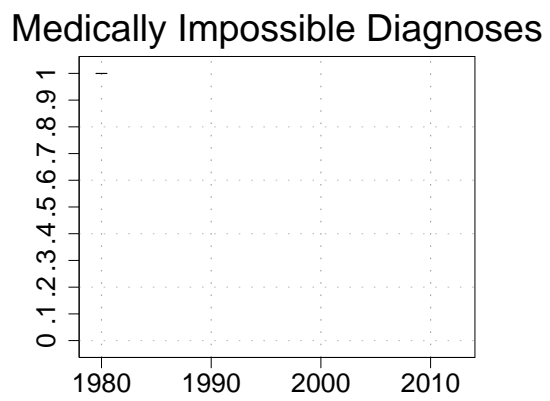

Indicators on their Original (Unweighted) Scale and Subtracted from One Where Necessary so Higher Scores are Preferable to Lower

# Chile

## VS Performance Index

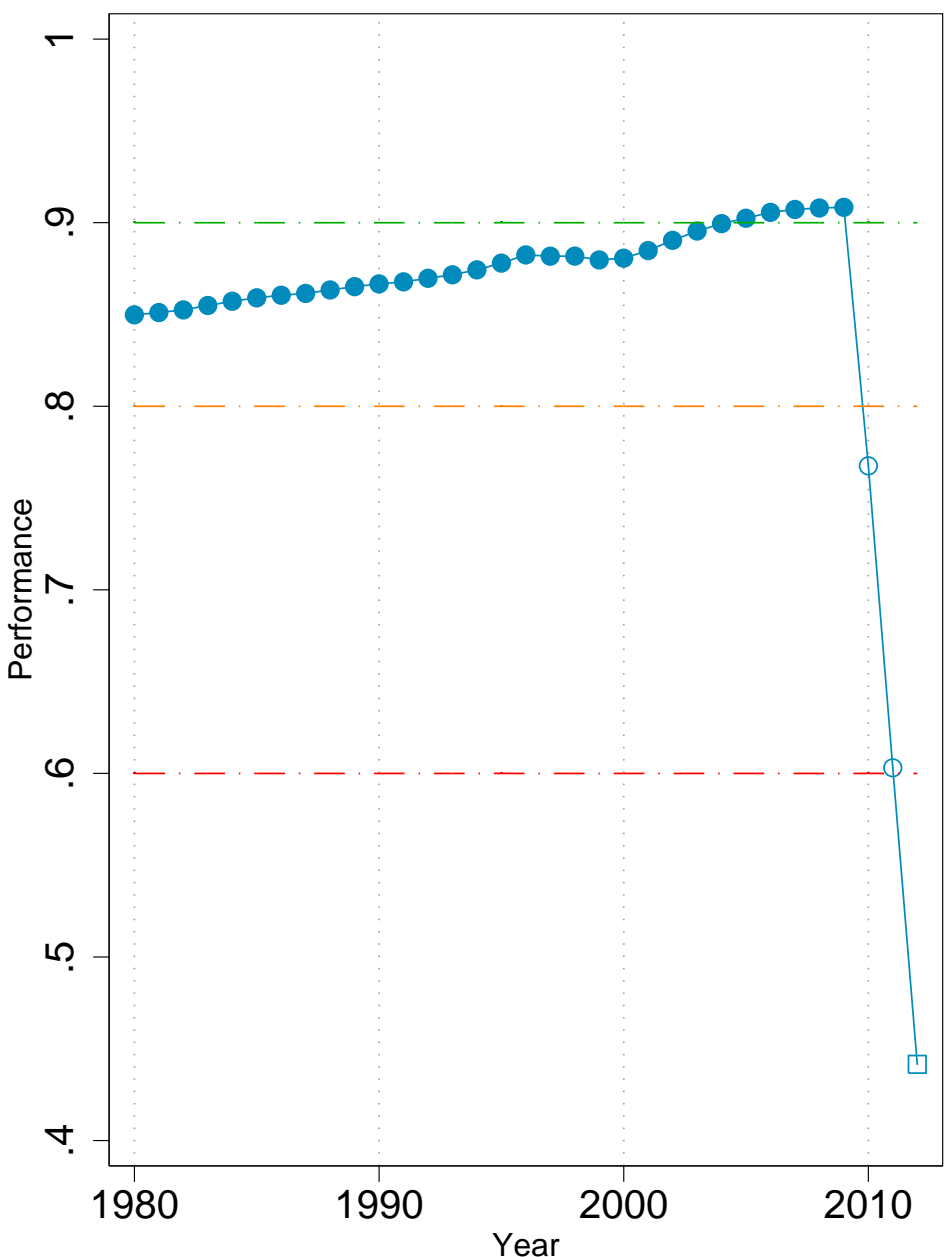

### Completeness

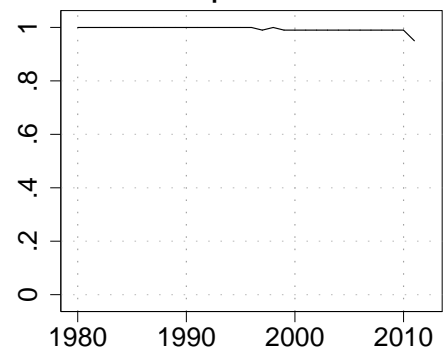

### Garbage Coding

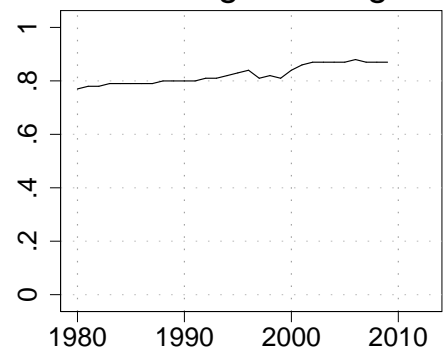

### Length of Cause List

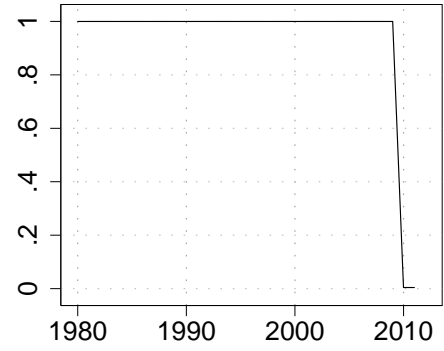

### Age/Sex Unspecified

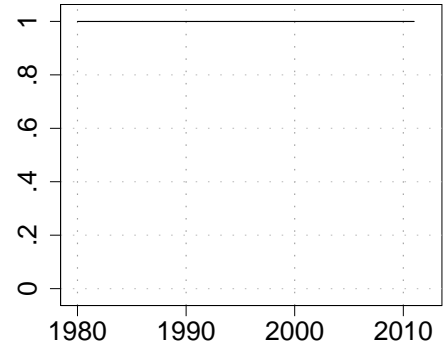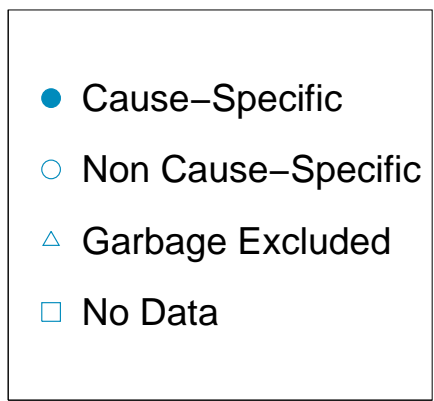

### Medically Impossible Diagnoses

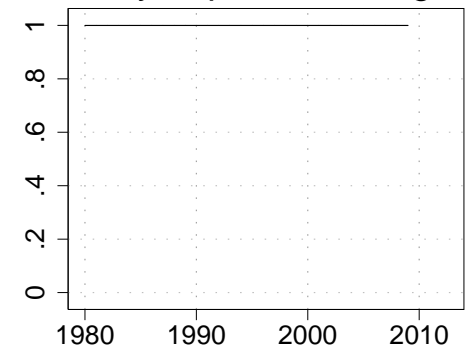

Indicators on their Original (Unweighted) Scale and Subtracted from One Where Necessary so Higher Scores are Preferable to Lower

# China

## VS Performance Index

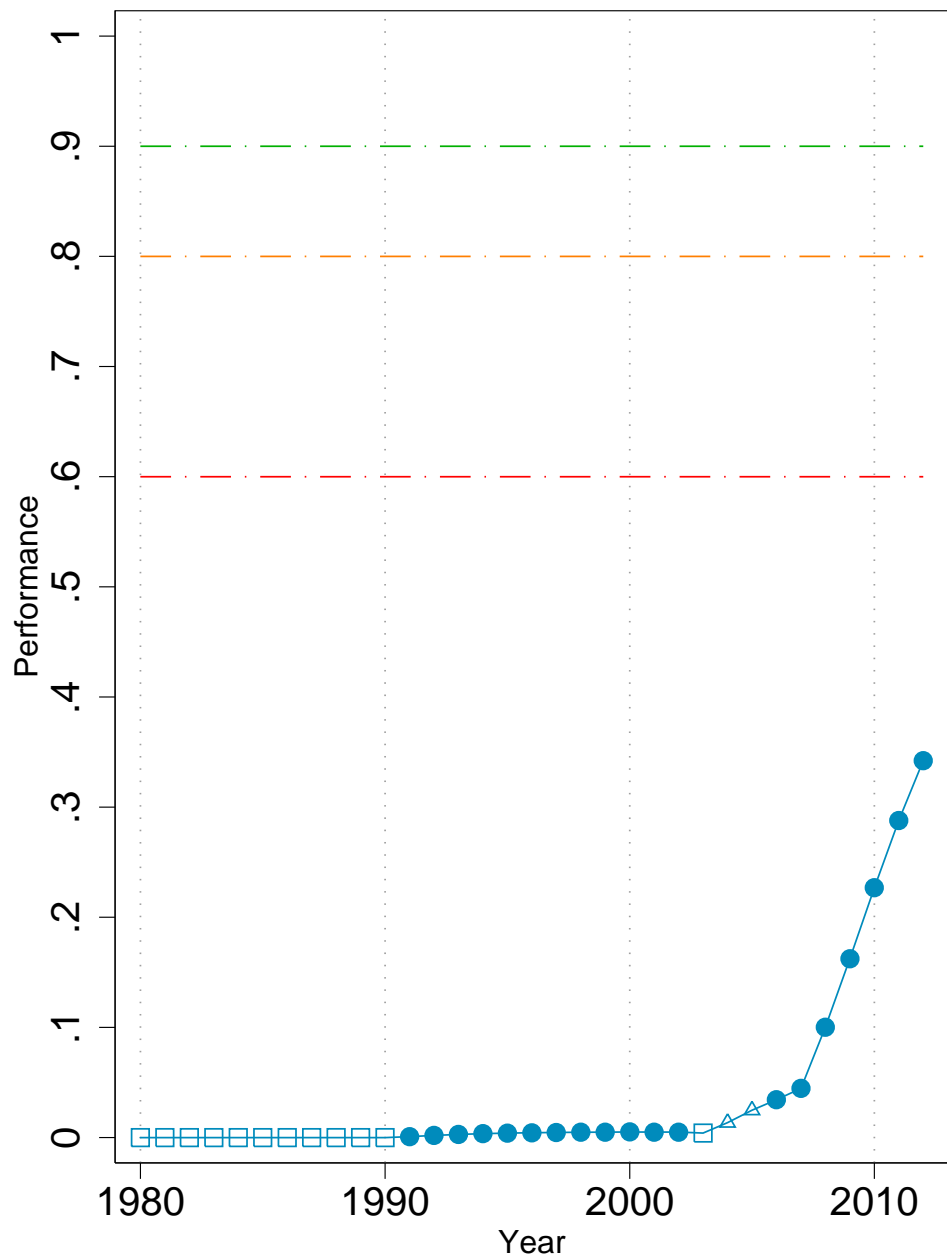

### Completeness

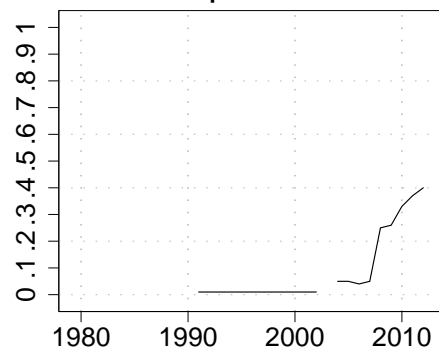

### Garbage Coding

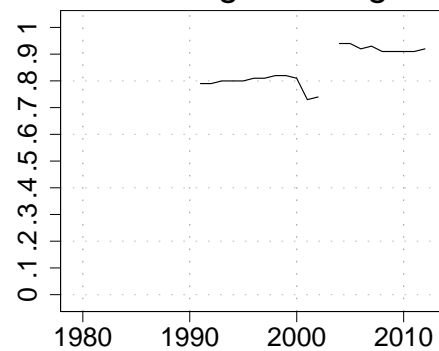

### Length of Cause List

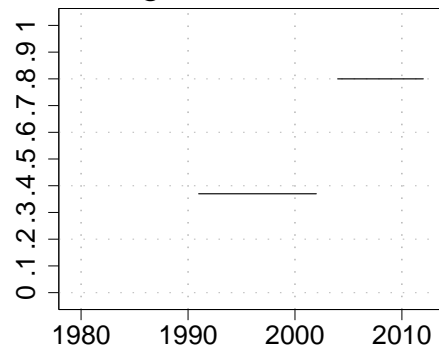

### Age/Sex Unspecified

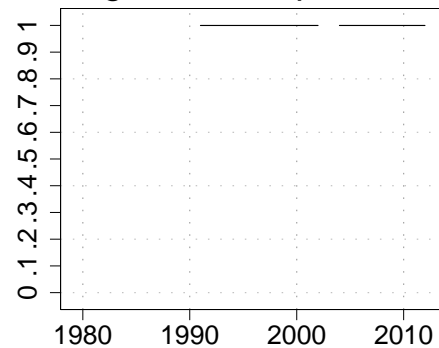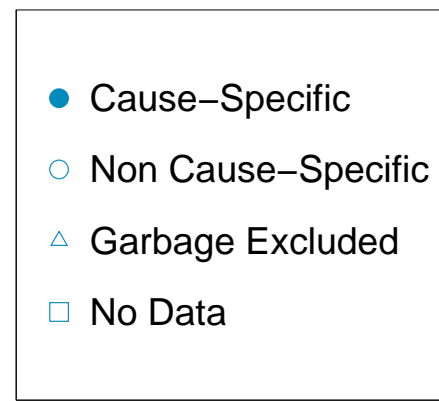

### Medically Impossible Diagnoses

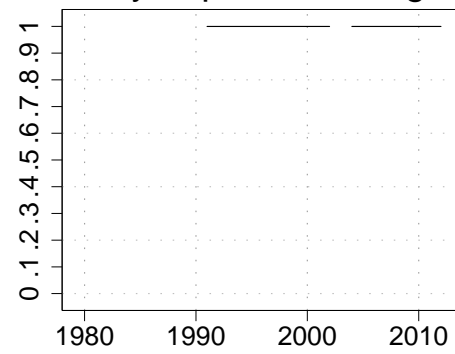

Indicators on their Original (Unweighted) Scale and Subtracted from One Where Necessary so Higher Scores are Preferable to Lower

# Colombia

## VS Performance Index

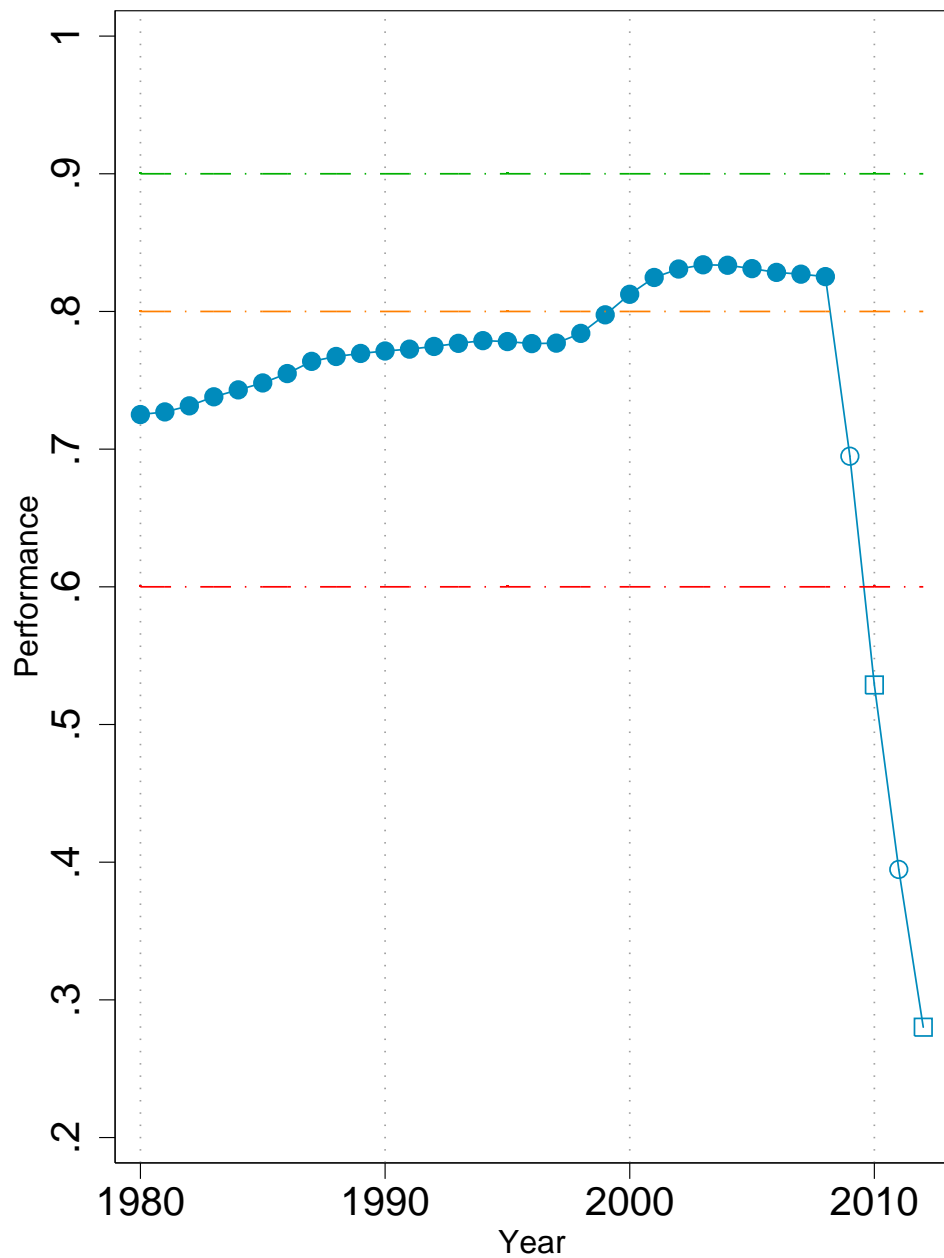

### Completeness

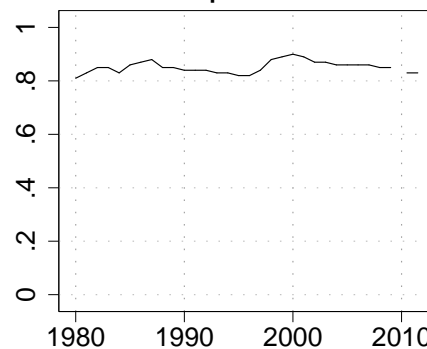

### Garbage Coding

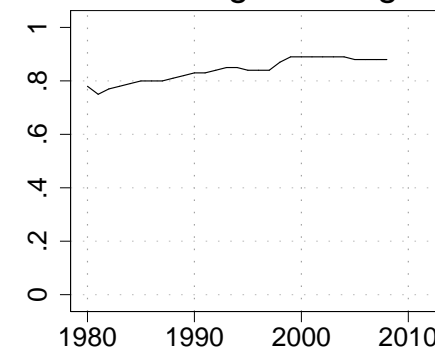

### Length of Cause List

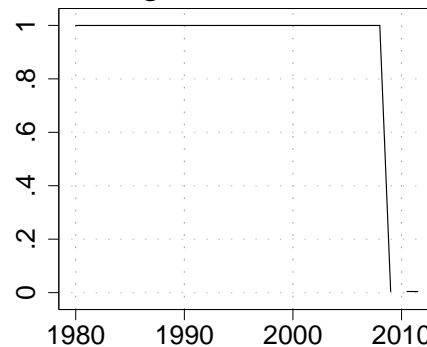

### Age/Sex Unspecified

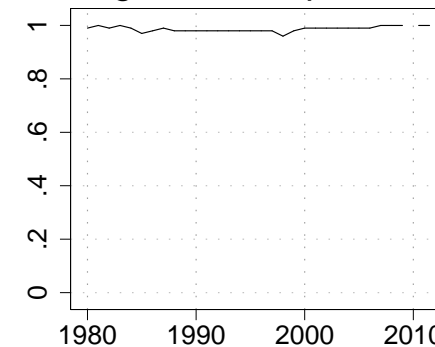

### Medically Impossible Diagnoses

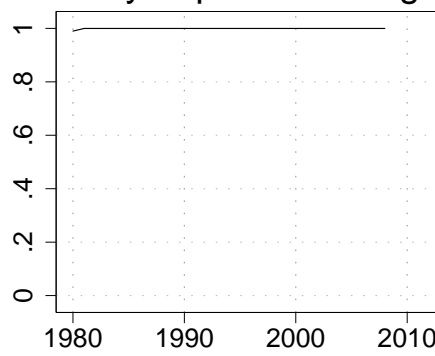

Indicators on their Original (Unweighted) Scale and Subtracted from One Where Necessary so Higher Scores are Preferable to Lower



# Costa Rica

## VS Performance Index

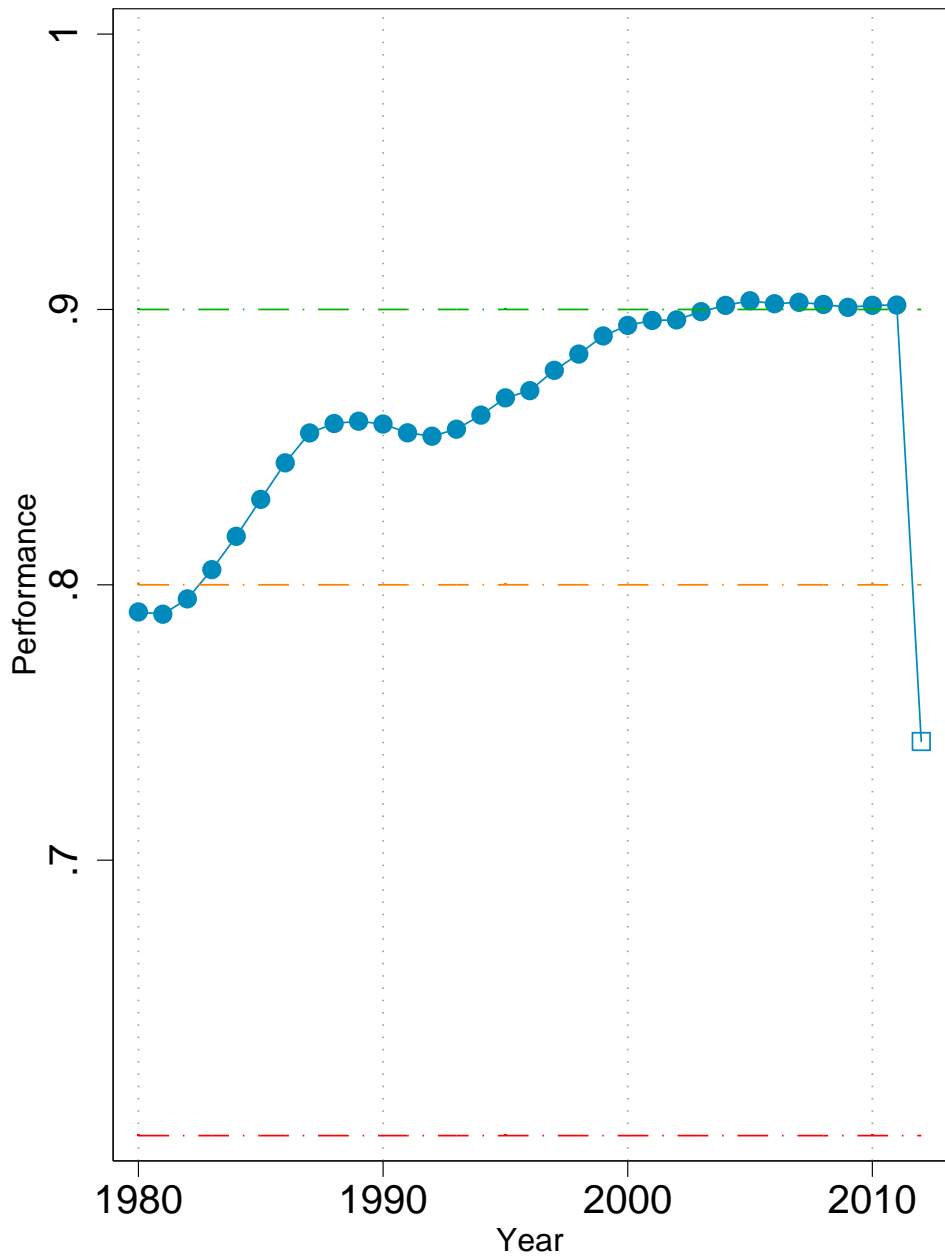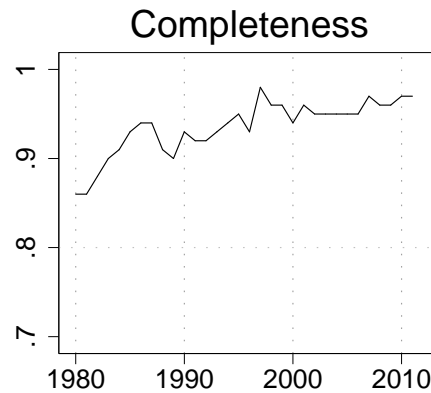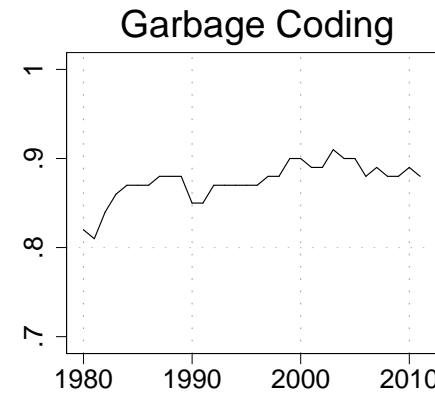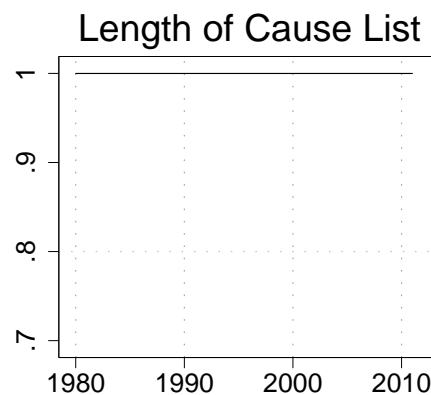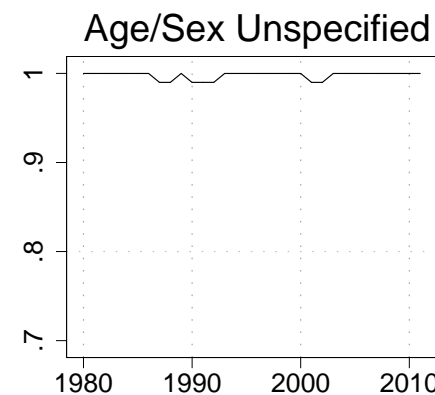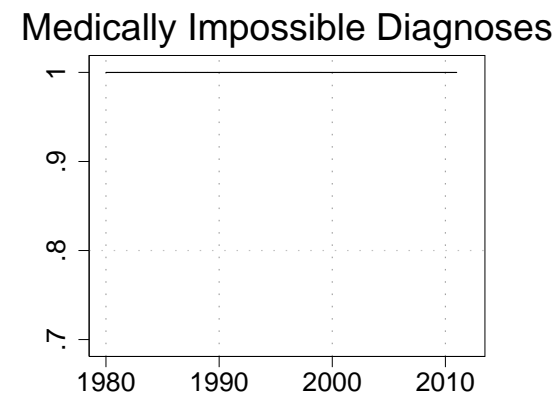

Indicators on their Original (Unweighted) Scale and Subtracted from One Where Necessary so Higher Scores are Preferable to Lower

# Croatia

## VS Performance Index

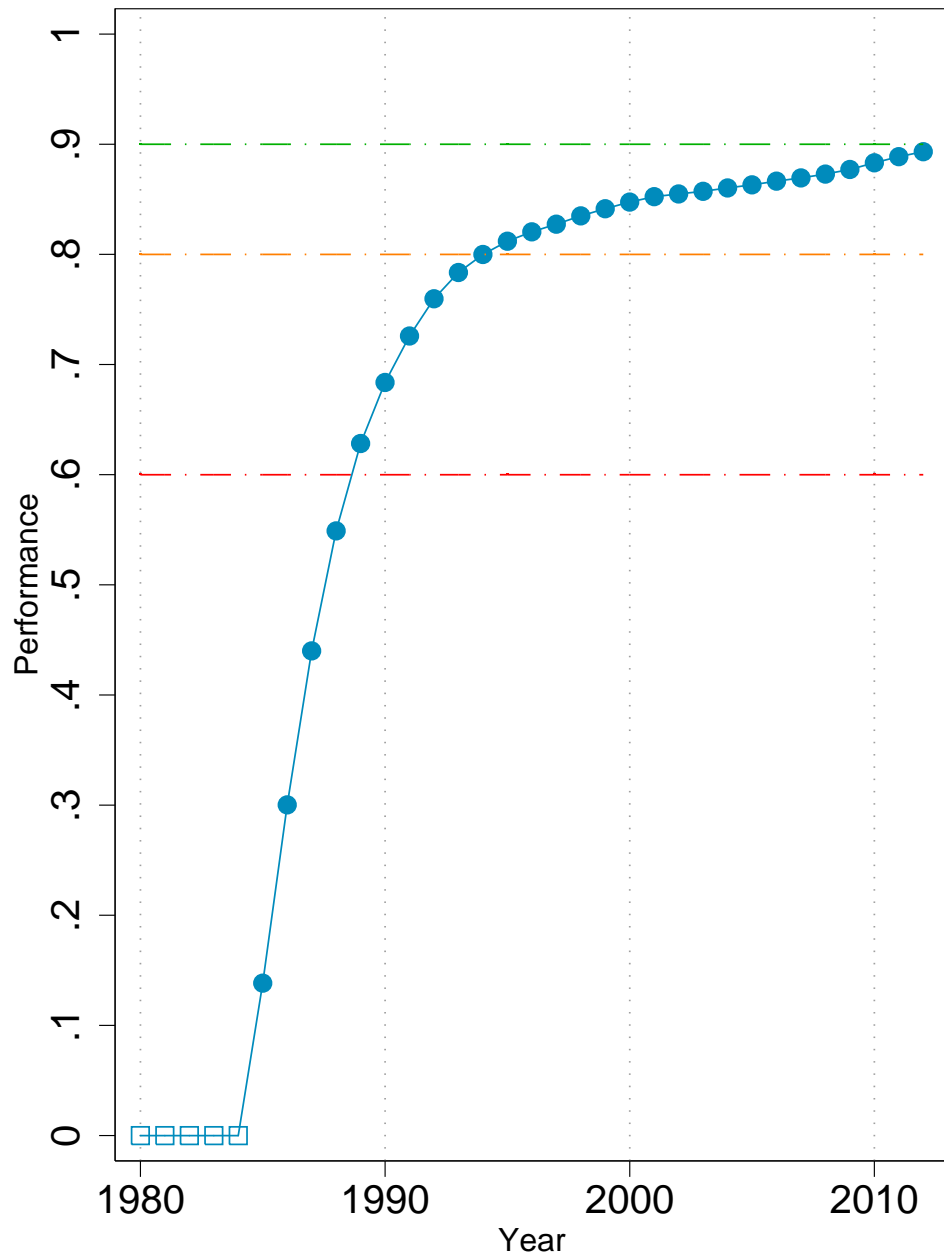

### Completeness

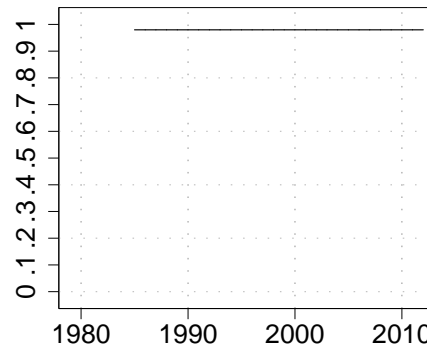

### Garbage Coding

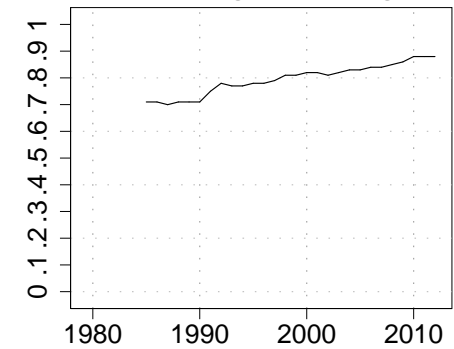

### Length of Cause List

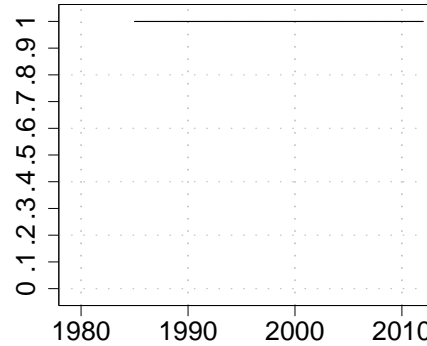

### Age/Sex Unspecified

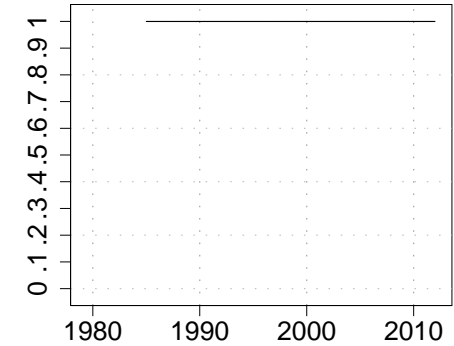

### Medically Impossible Diagnoses

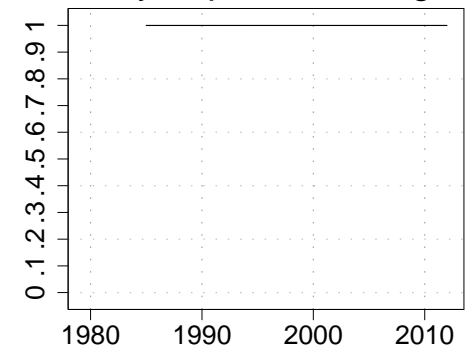

Indicators on their Original (Unweighted) Scale and Subtracted from One Where Necessary so Higher Scores are Preferable to Lower

# Cuba

## VS Performance Index

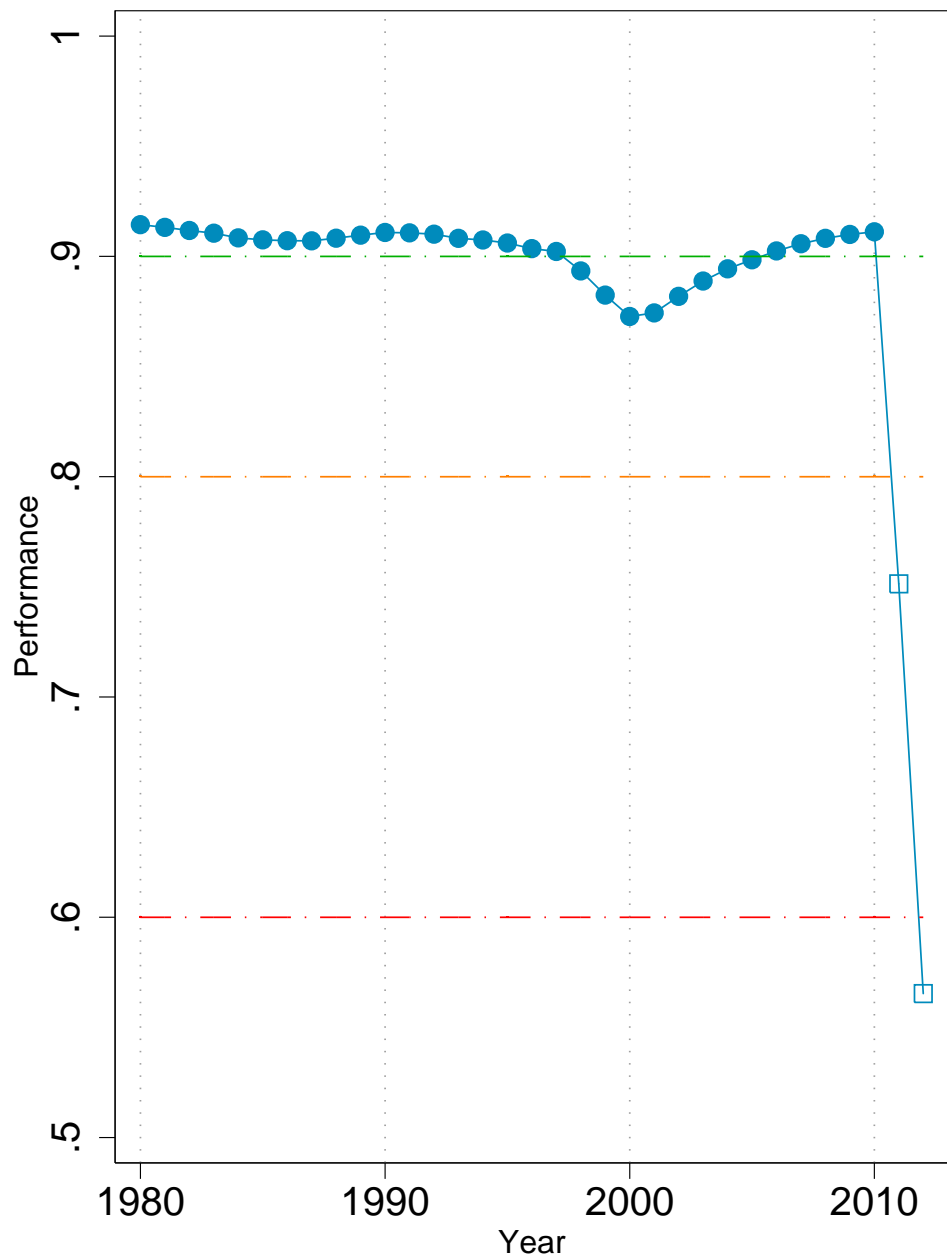

### Completeness

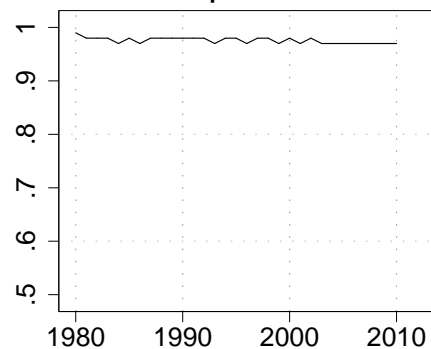

### Garbage Coding

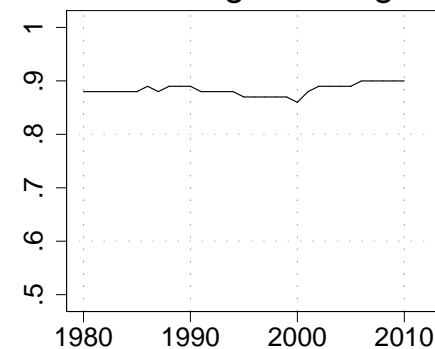

### Length of Cause List

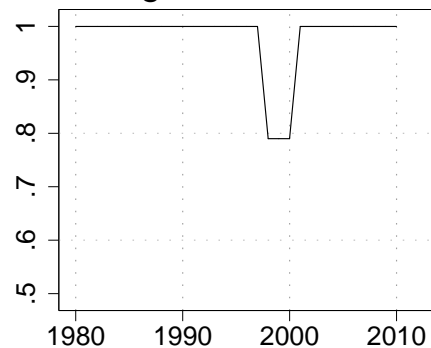

### Age/Sex Unspecified

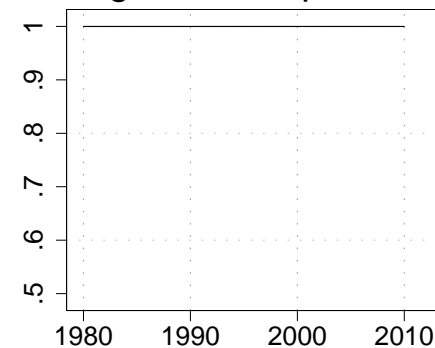

### Medically Impossible Diagnoses

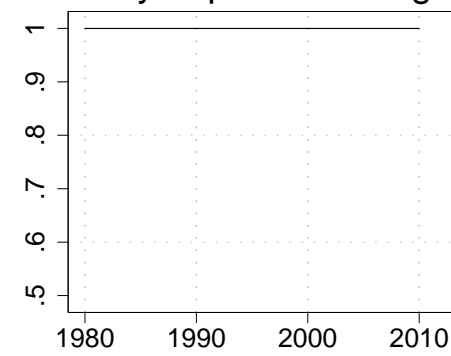

Indicators on their Original (Unweighted) Scale and Subtracted from One Where Necessary so Higher Scores are Preferable to Lower

# Cyprus

## VS Performance Index

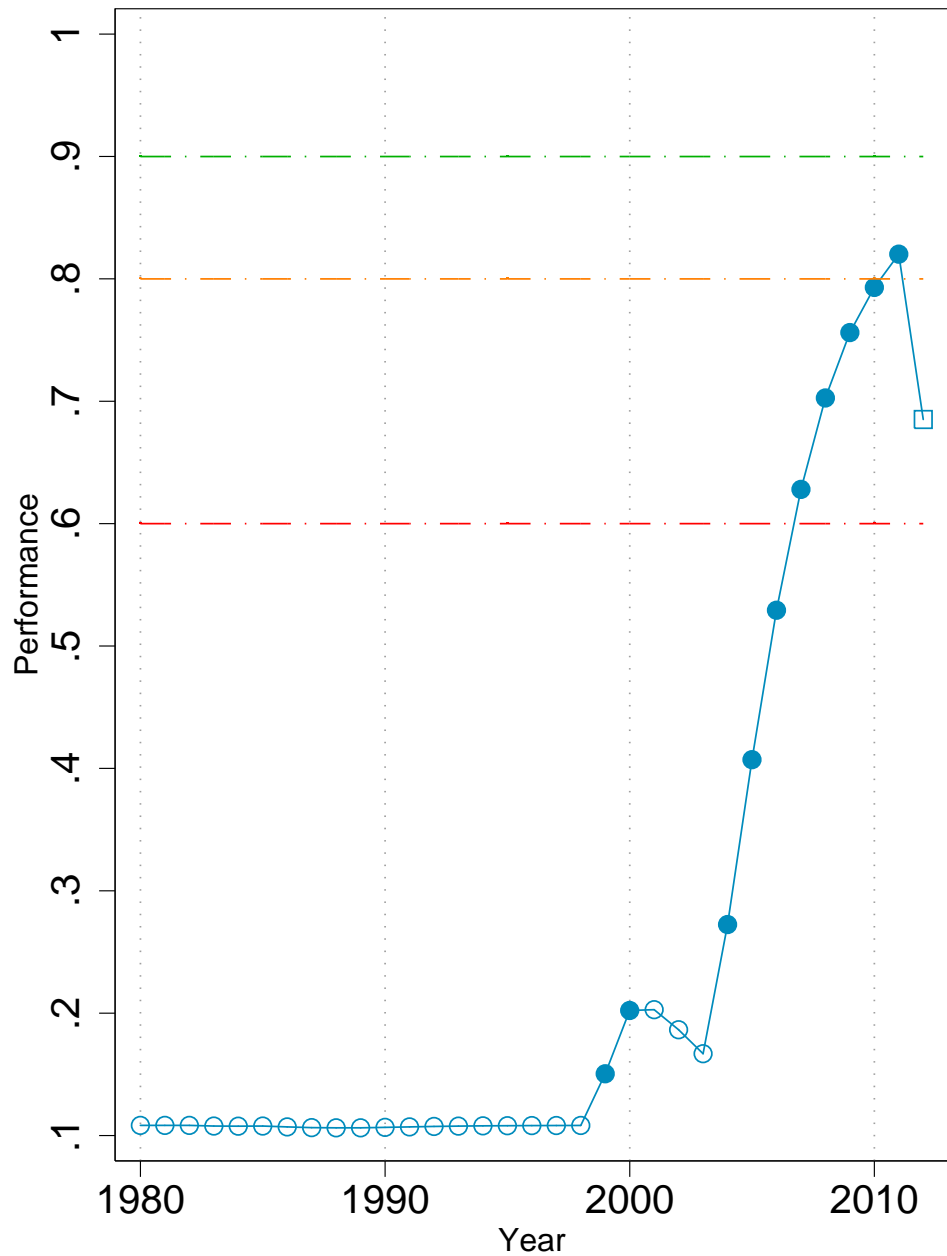

### Completeness

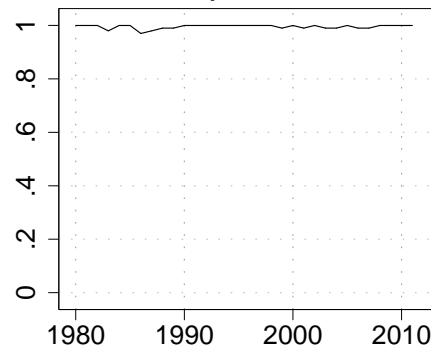

### Garbage Coding

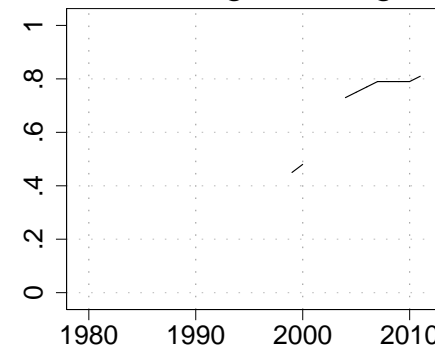

### Length of Cause List

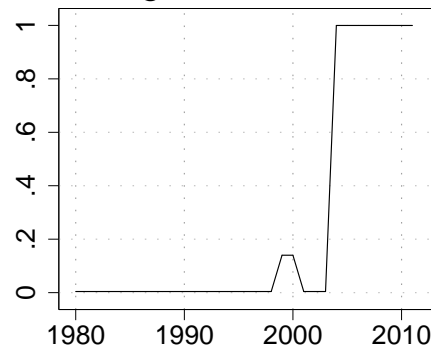

### Age/Sex Unspecified

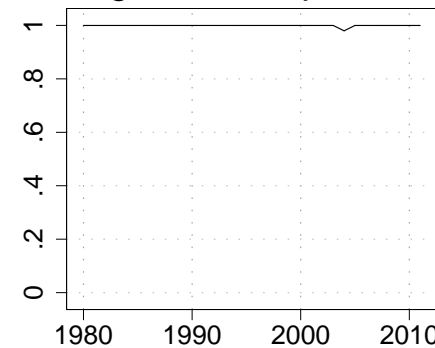

### Medically Impossible Diagnoses

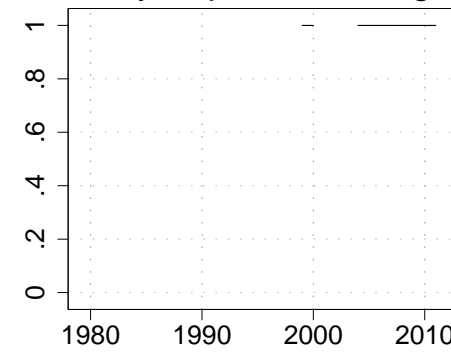

Indicators on their Original (Unweighted) Scale and Subtracted from One Where Necessary so Higher Scores are Preferable to Lower

# Czech Republic VS Performance Index

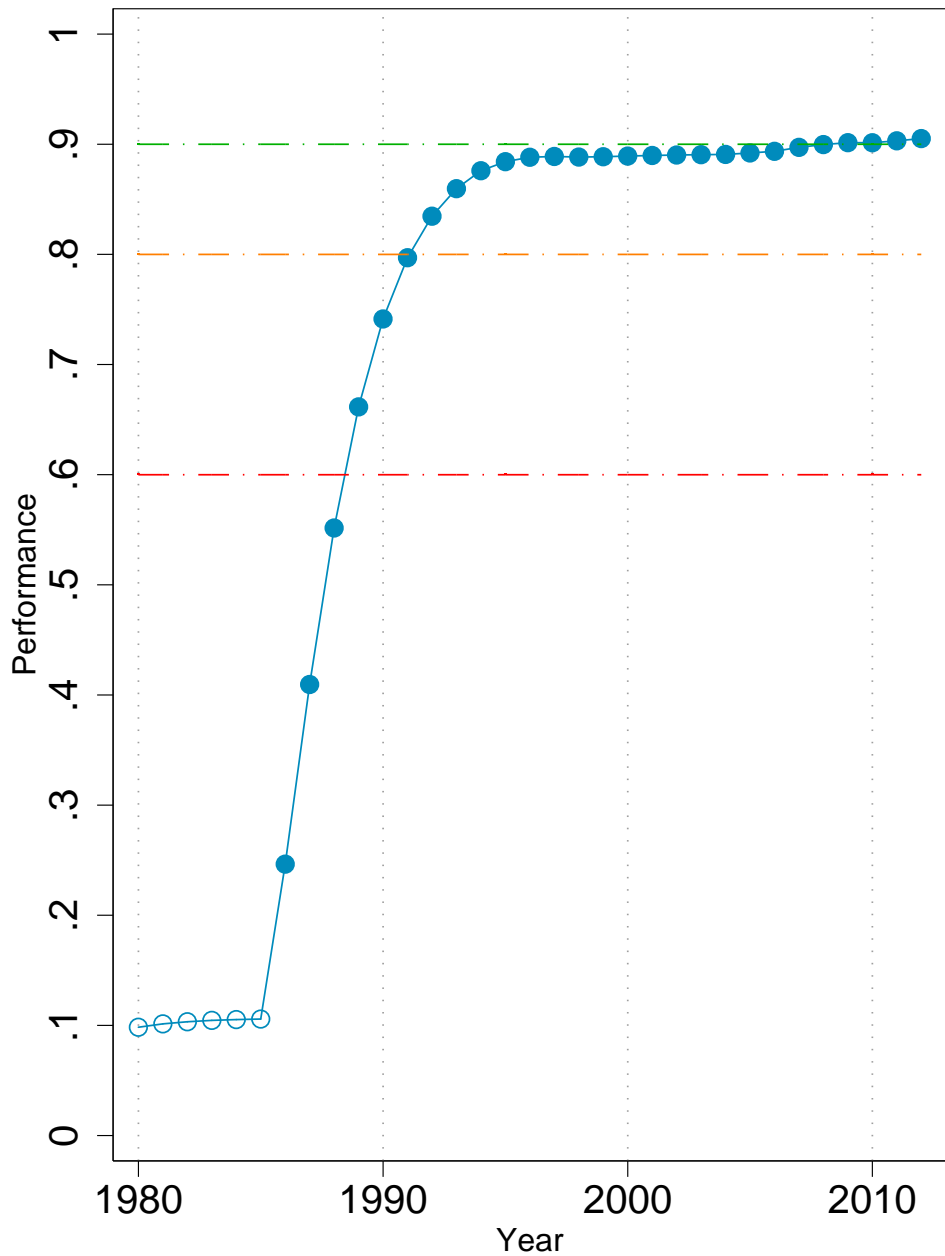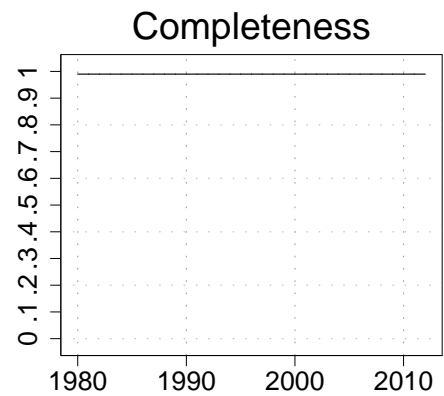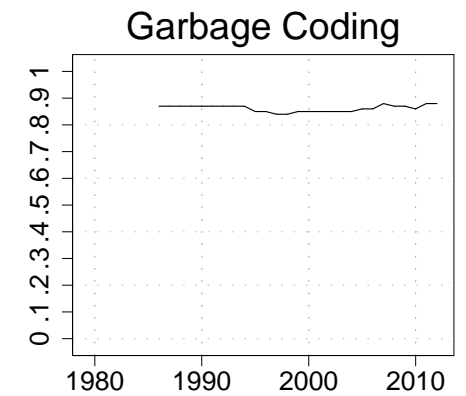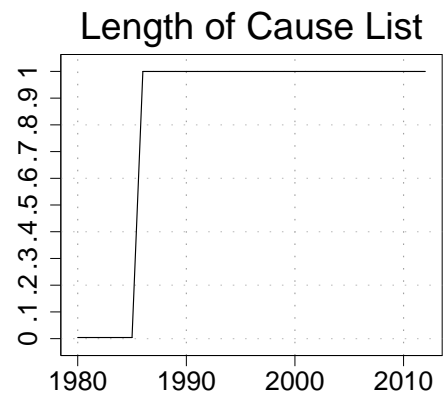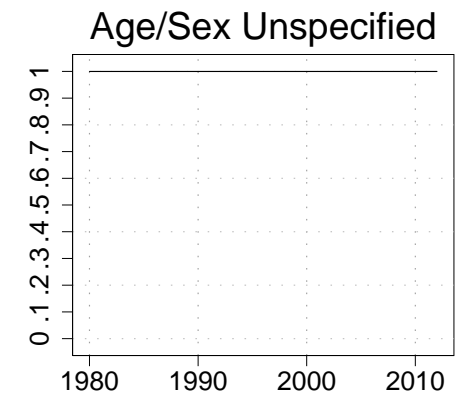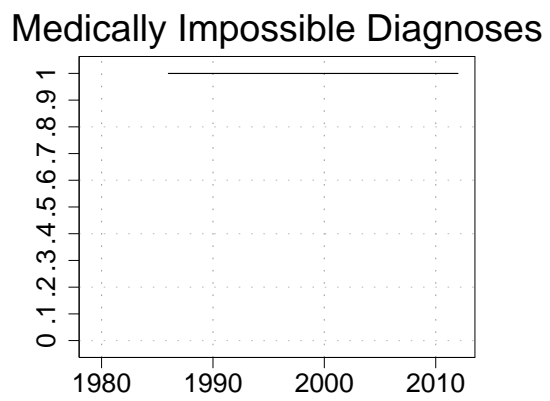

Indicators on their Original (Unweighted) Scale and Subtracted from One Where Necessary so Higher Scores are Preferable to Lower

# Denmark

## VS Performance Index

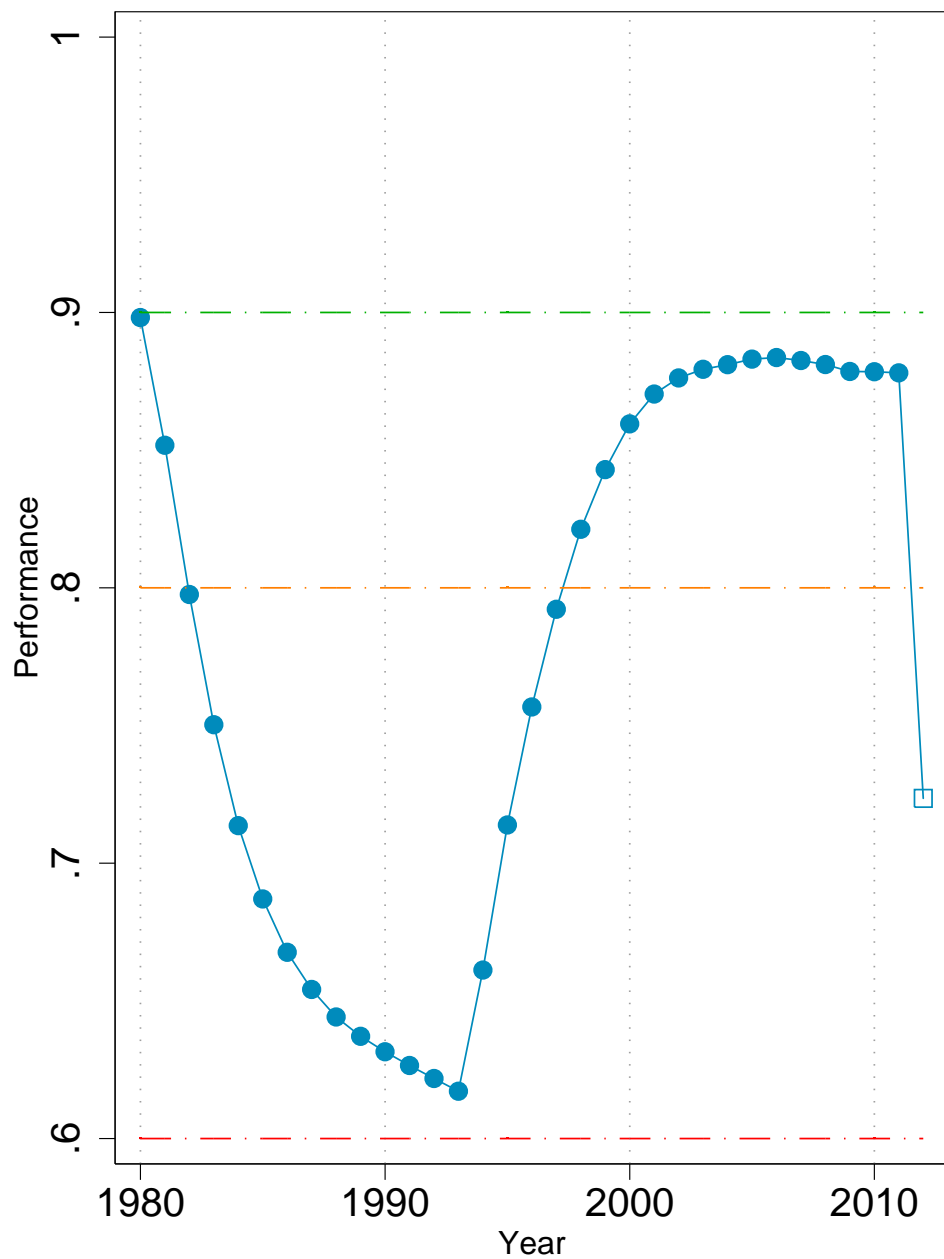

Completeness

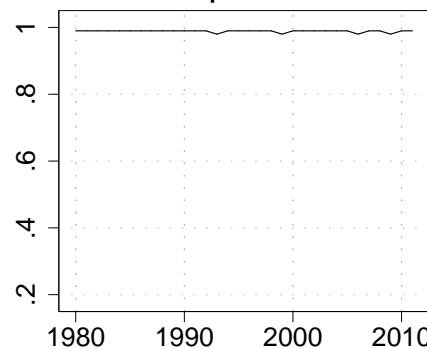

Garbage Coding

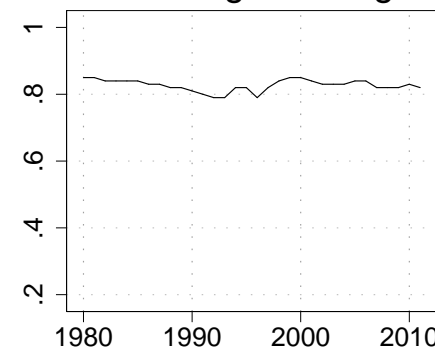

Length of Cause List

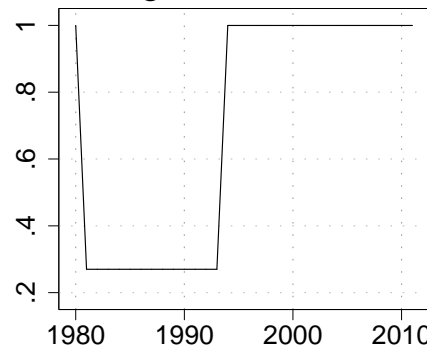

Age/Sex Unspecified

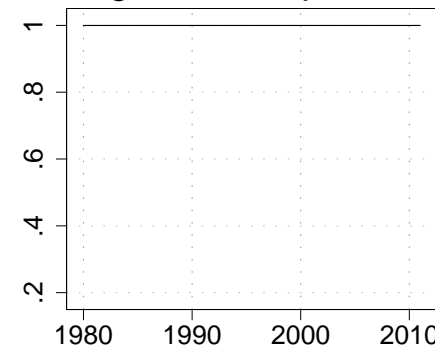

Medically Impossible Diagnoses

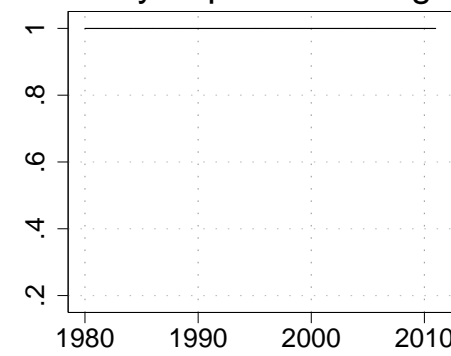

Indicators on their Original (Unweighted) Scale and Subtracted from One Where Necessary so Higher Scores are Preferable to Lower

# Dominica

## VS Performance Index

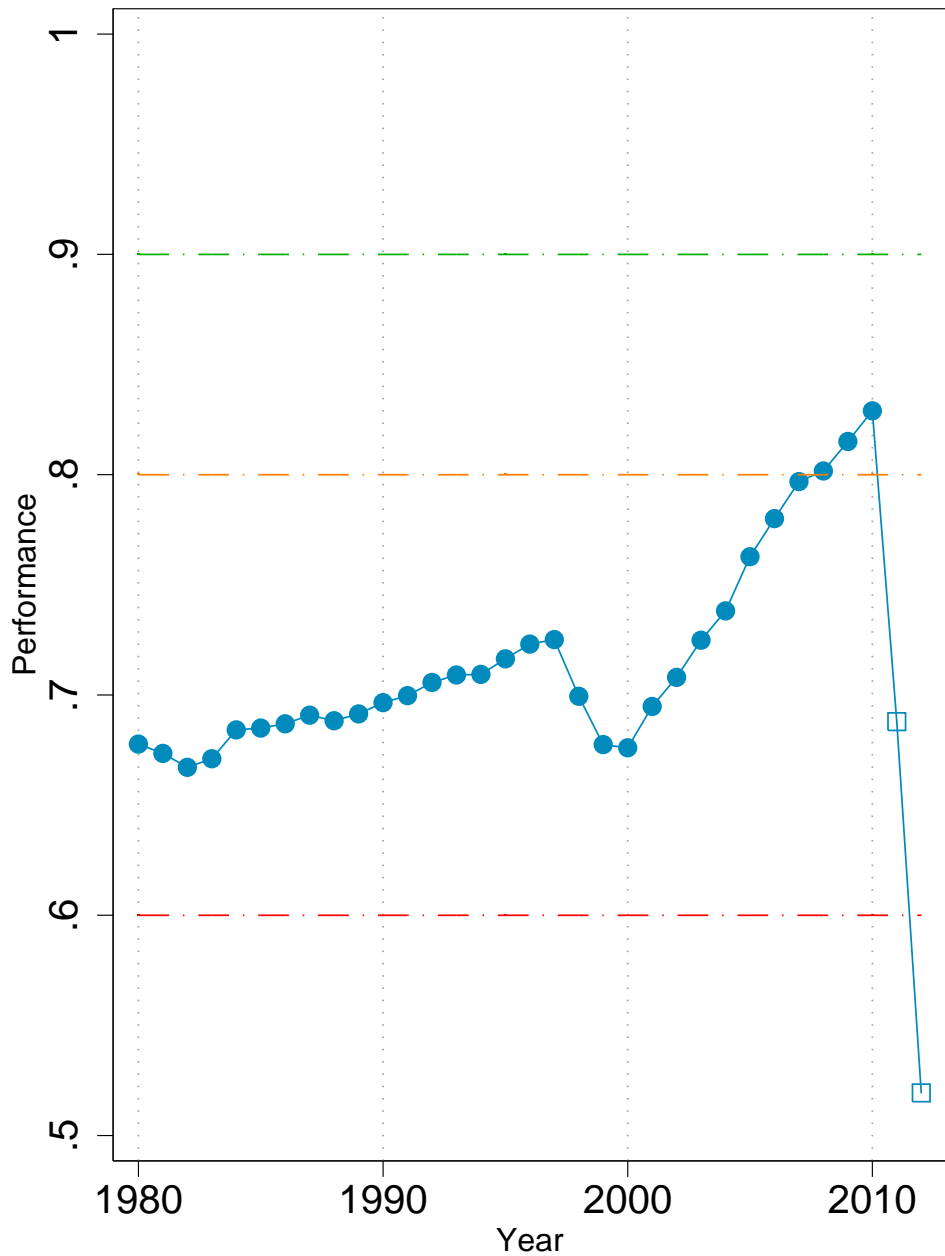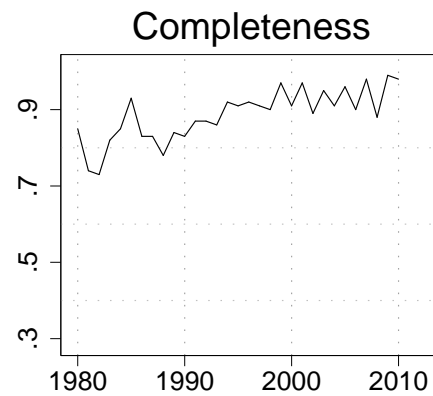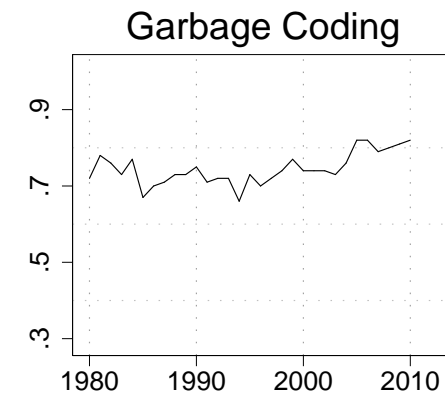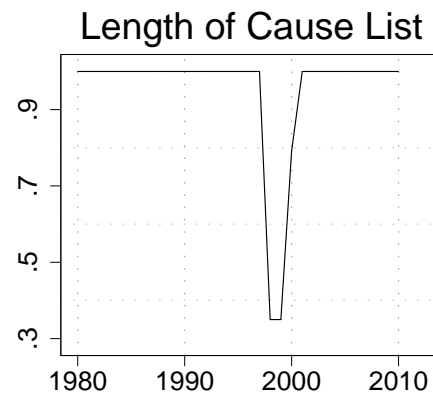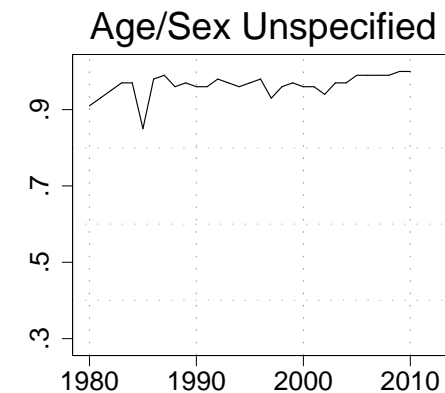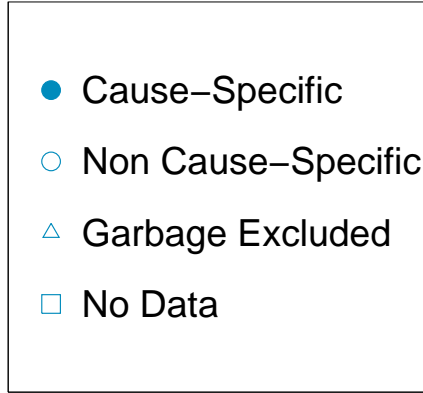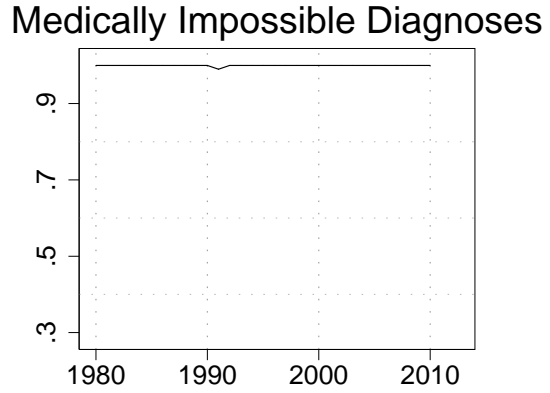

Indicators on their Original (Unweighted) Scale and Subtracted from One Where Necessary so Higher Scores are Preferable to Lower

# Dominican Republic VS Performance Index

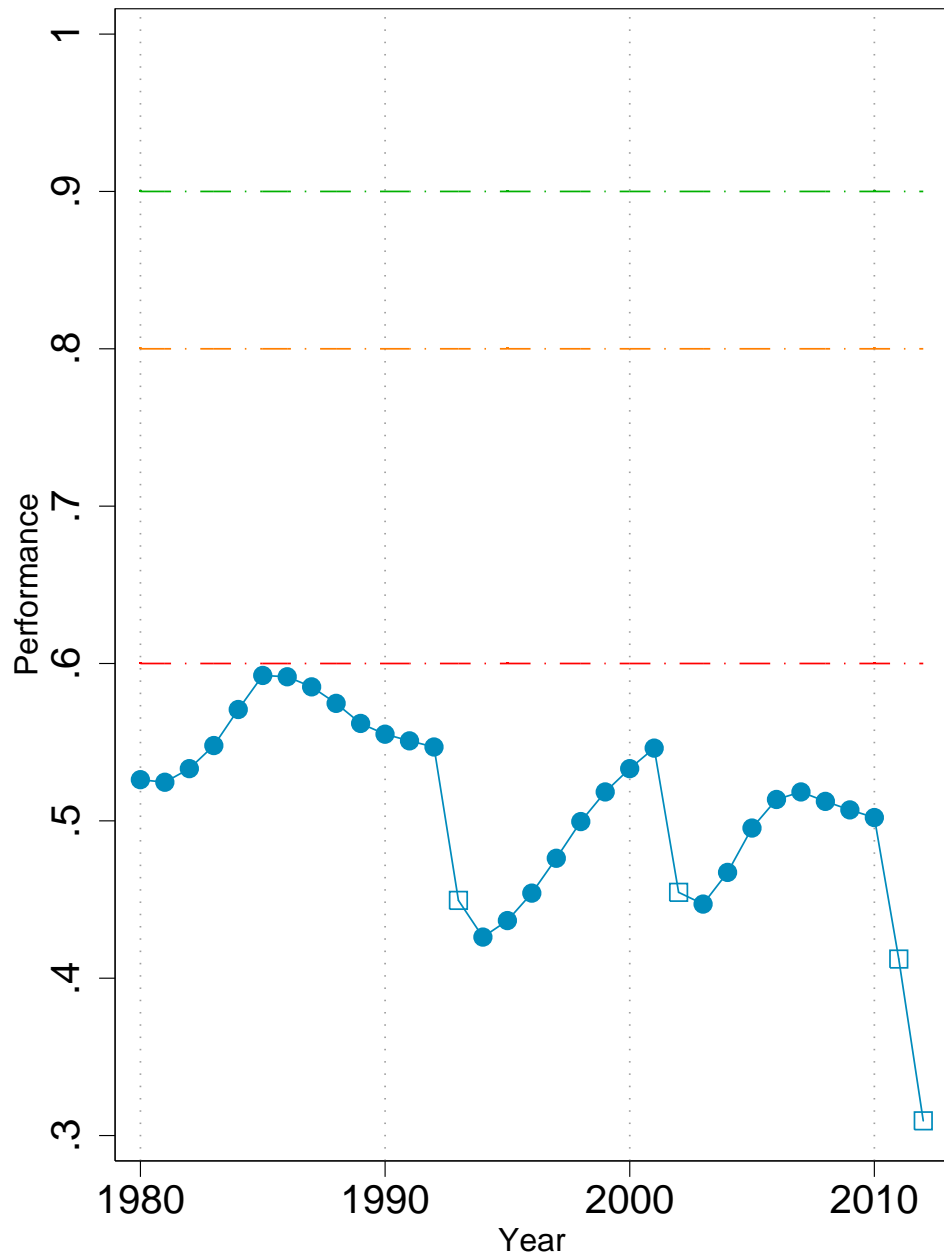

### Completeness

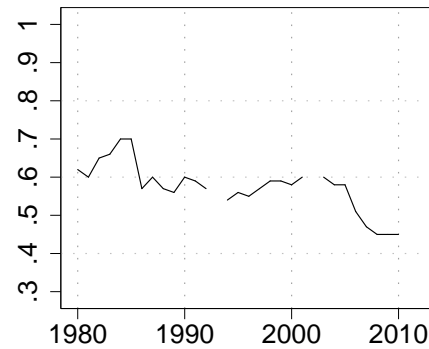

### Garbage Coding

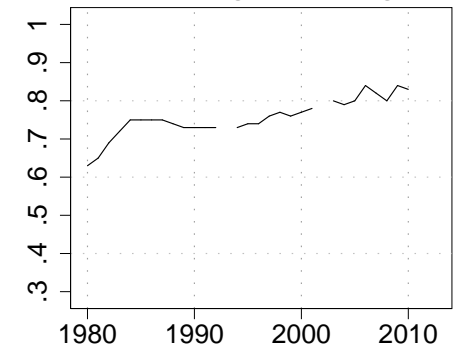

### Length of Cause List

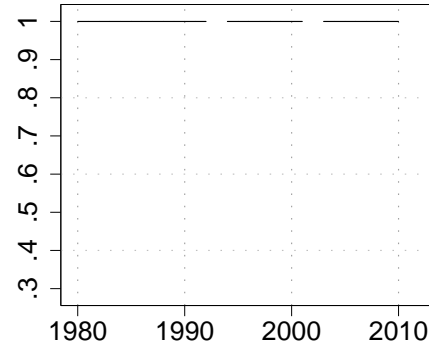

### Age/Sex Unspecified

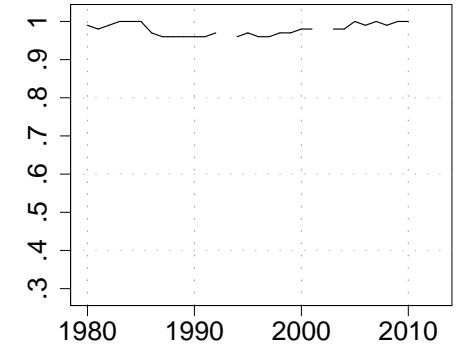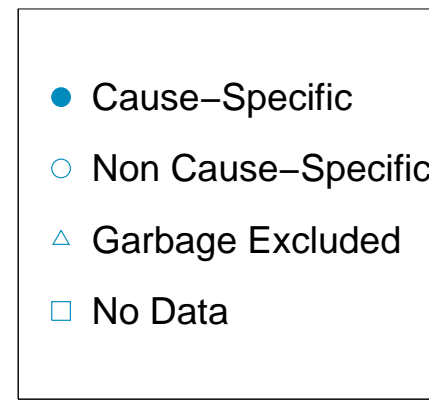

### Medically Impossible Diagnoses

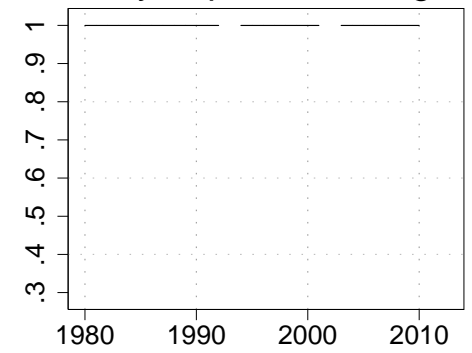

Indicators on their Original (Unweighted) Scale  
and Subtracted from One Where Necessary so Higher Scores are Preferable to Lower



# Ecuador

## VS Performance Index

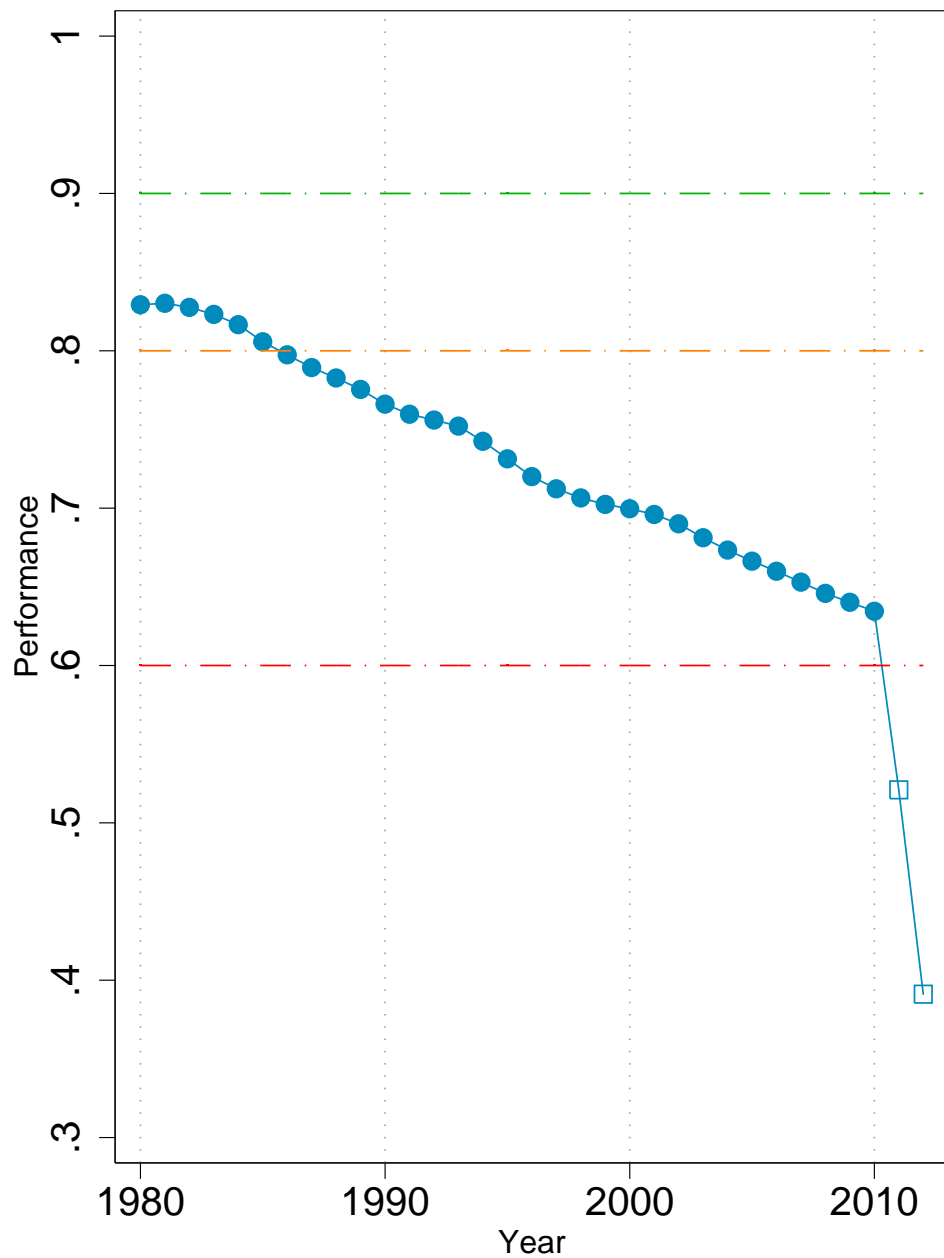

### Completeness

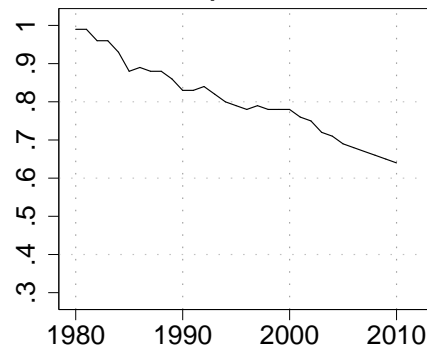

### Garbage Coding

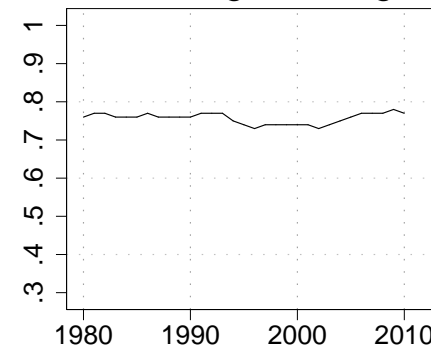

### Length of Cause List

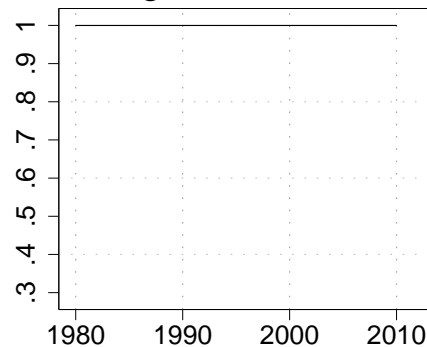

### Age/Sex Unspecified

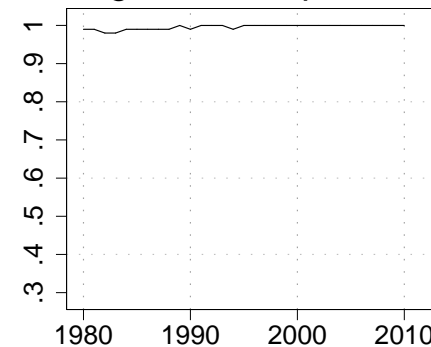

### Medically Impossible Diagnoses

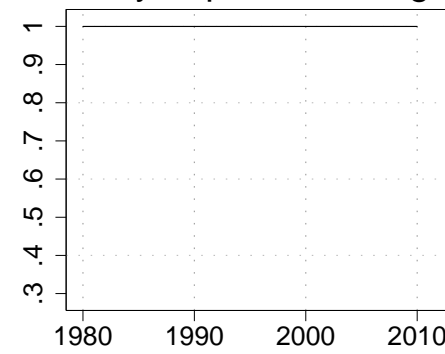

Indicators on their Original (Unweighted) Scale and Subtracted from One Where Necessary so Higher Scores are Preferable to Lower

# Egypt

## VS Performance Index

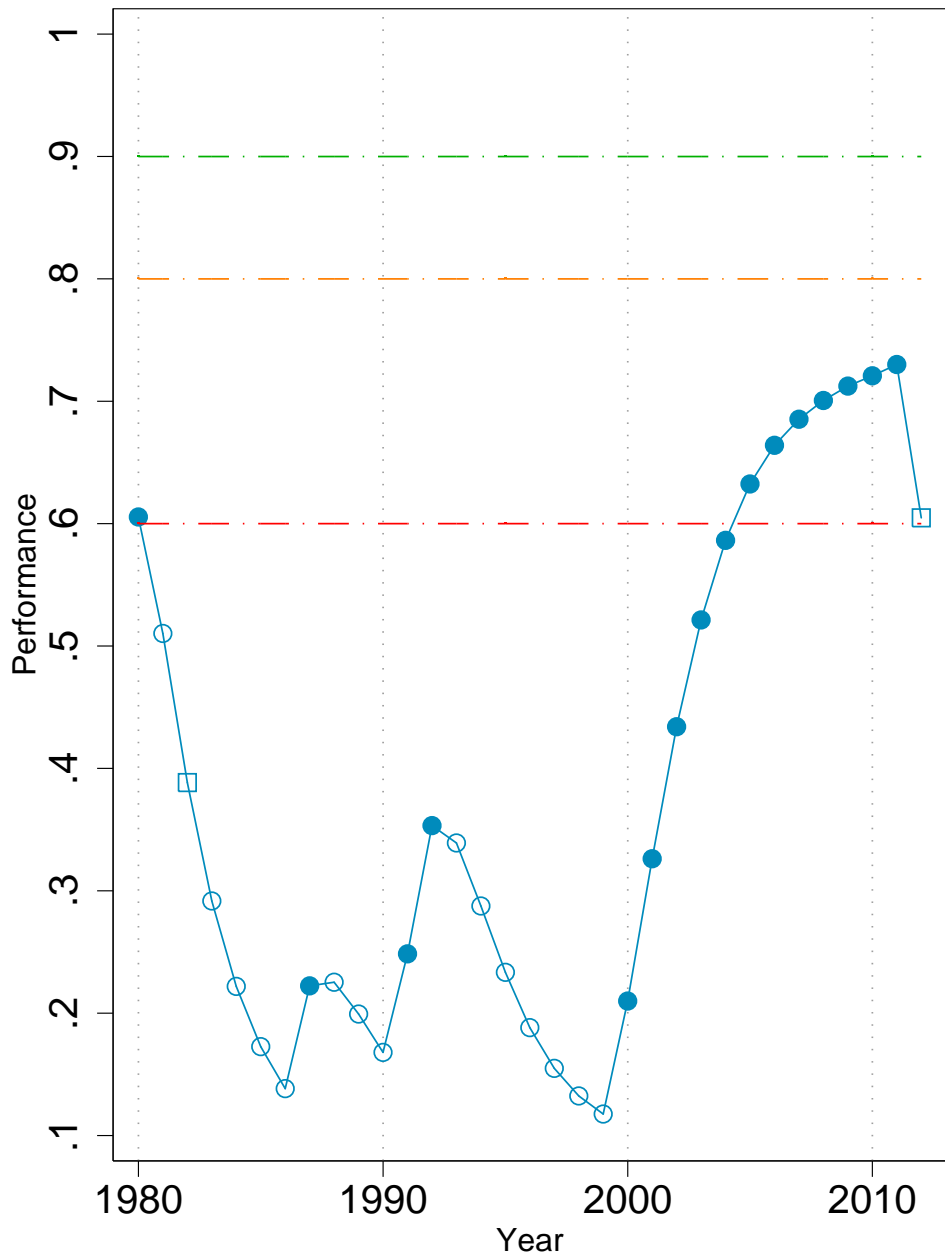

### Completeness

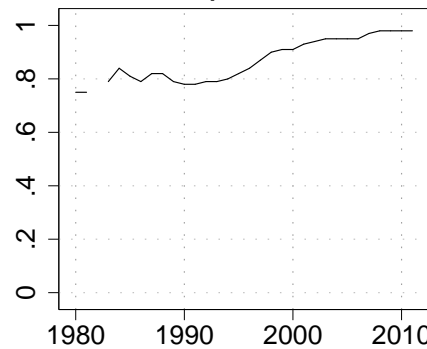

### Garbage Coding

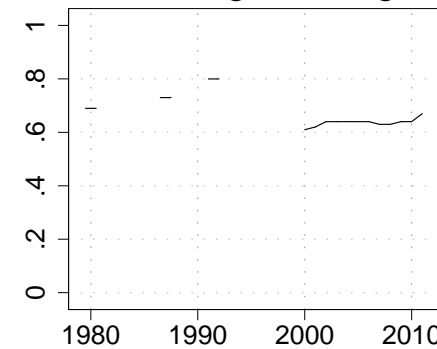

### Length of Cause List

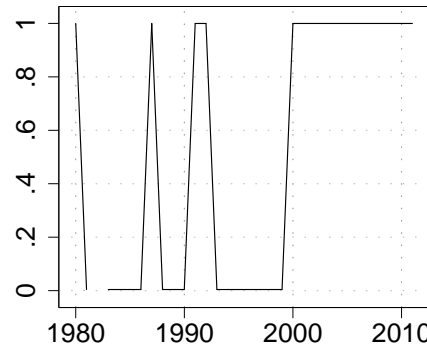

### Age/Sex Unspecified

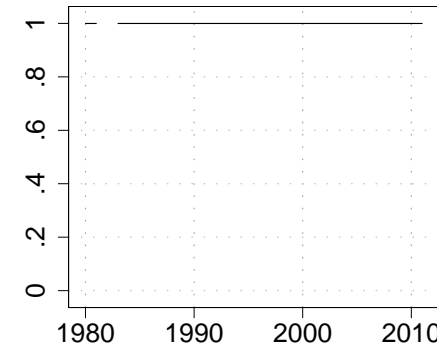

### Medically Impossible Diagnoses

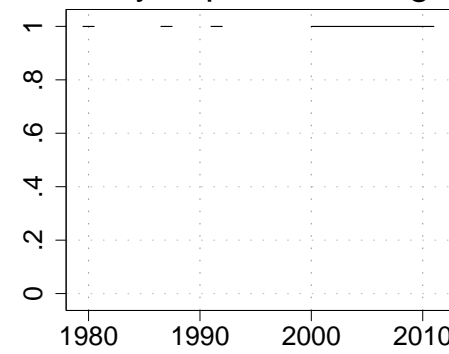

Indicators on their Original (Unweighted) Scale and Subtracted from One Where Necessary so Higher Scores are Preferable to Lower

# El Salvador

## VS Performance Index

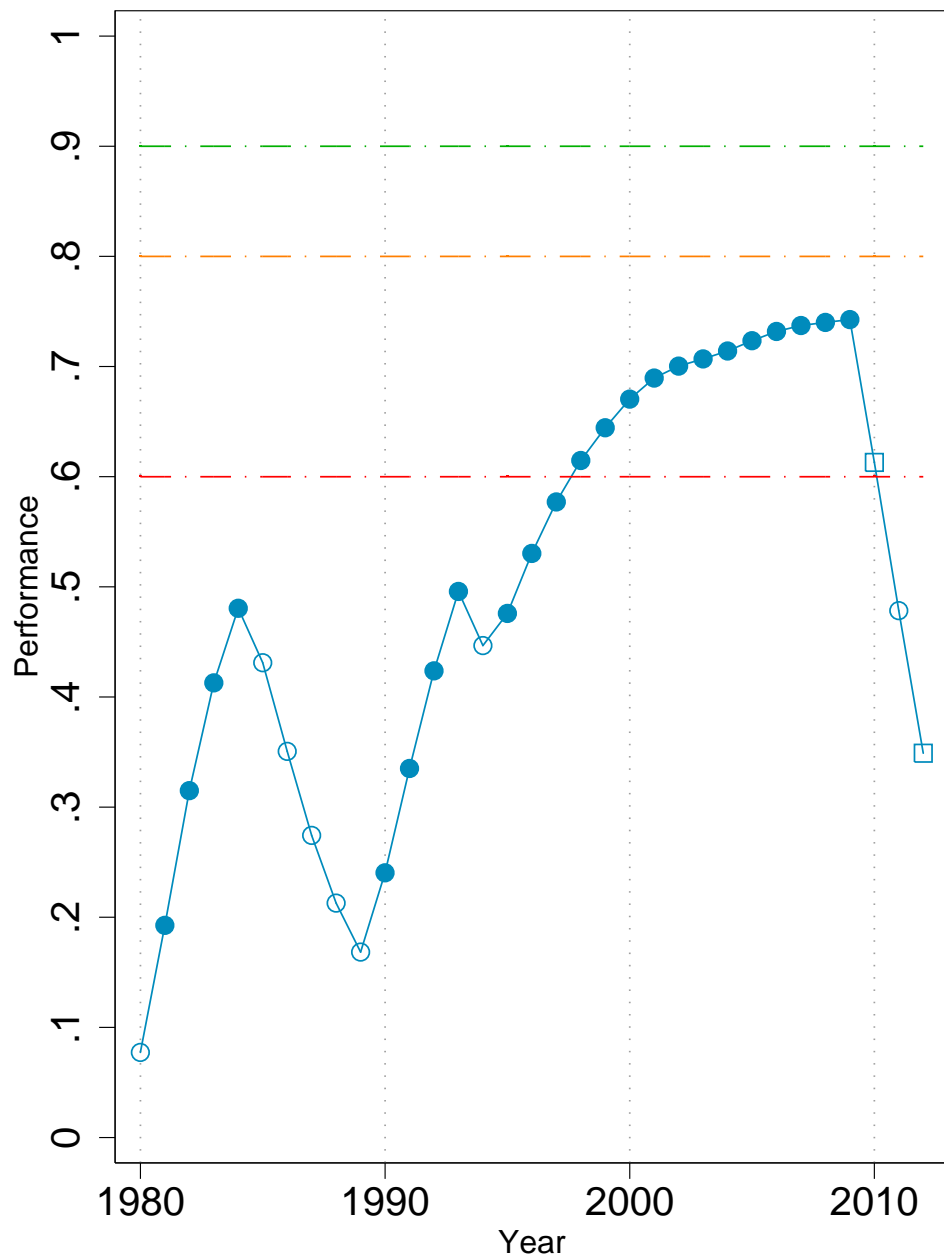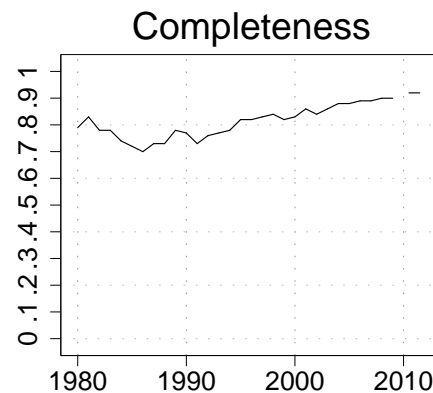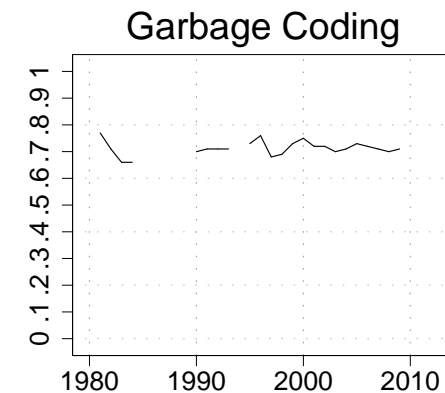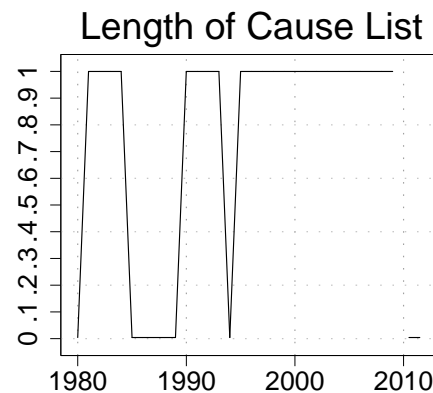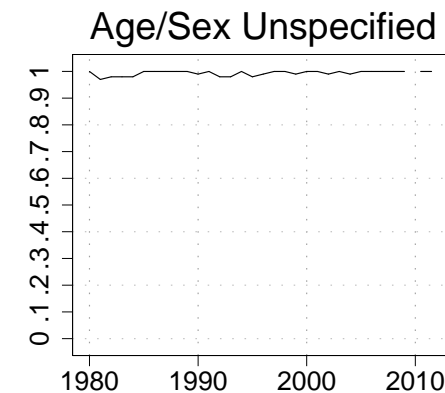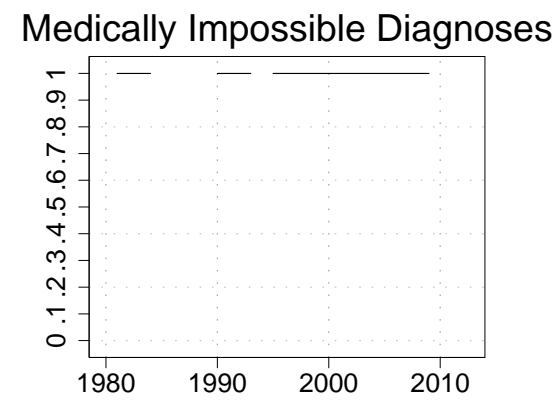

Indicators on their Original (Unweighted) Scale and Subtracted from One Where Necessary so Higher Scores are Preferable to Lower

# Estonia

## VS Performance Index

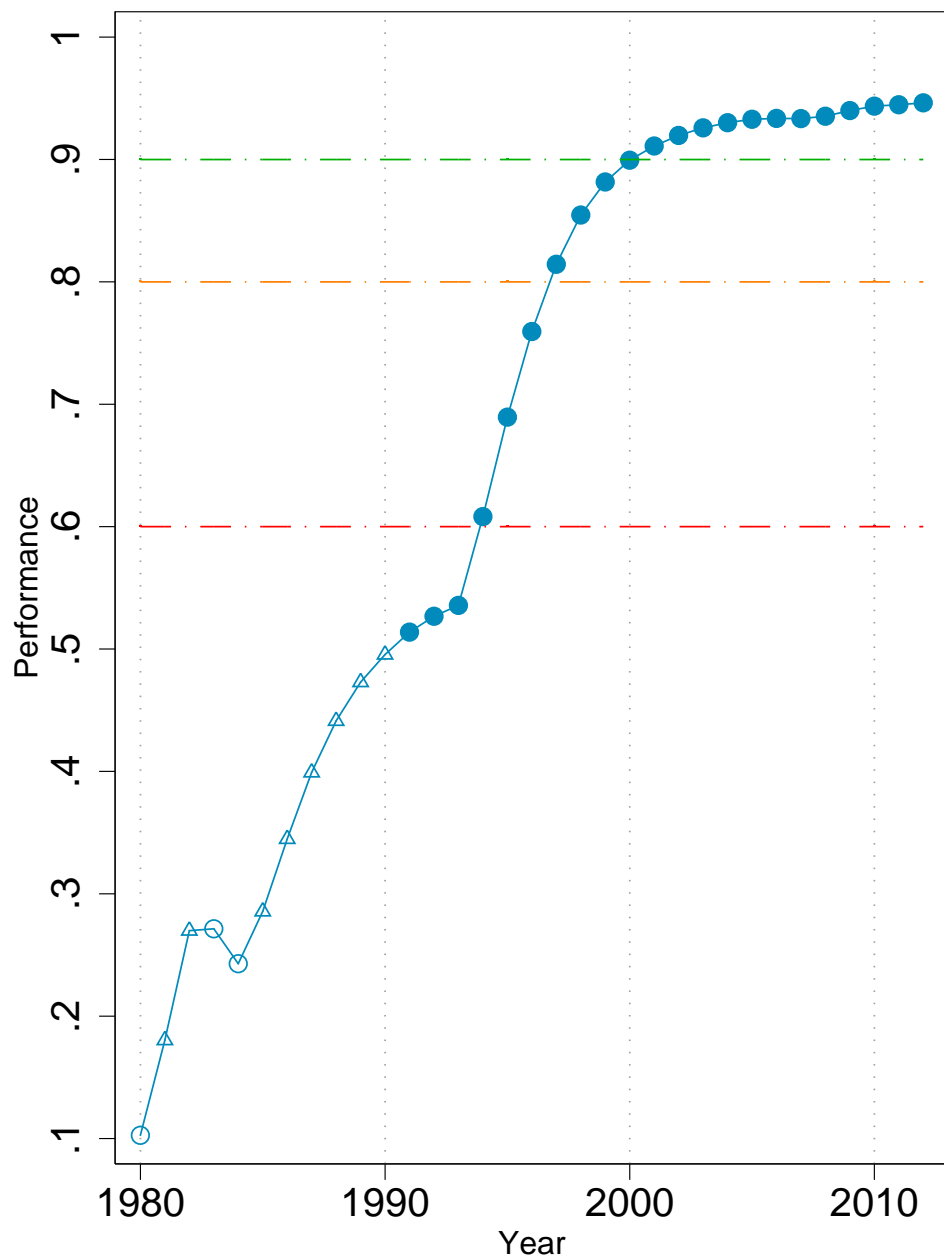

### Completeness

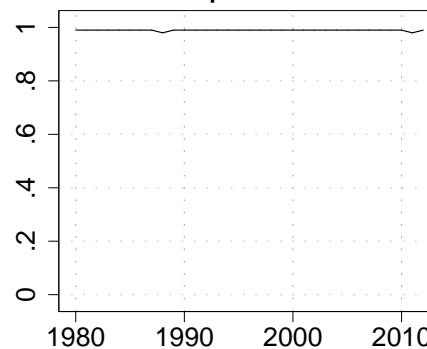

### Garbage Coding

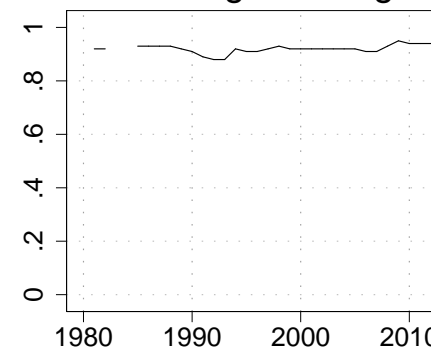

### Length of Cause List

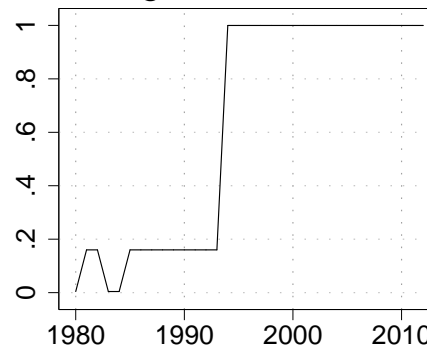

### Age/Sex Unspecified

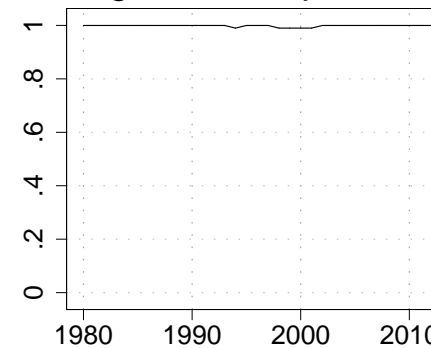

### Medically Impossible Diagnoses

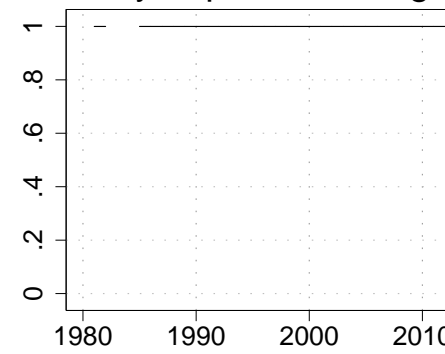

Indicators on their Original (Unweighted) Scale and Subtracted from One Where Necessary so Higher Scores are Preferable to Lower

# Fiji

## VS Performance Index

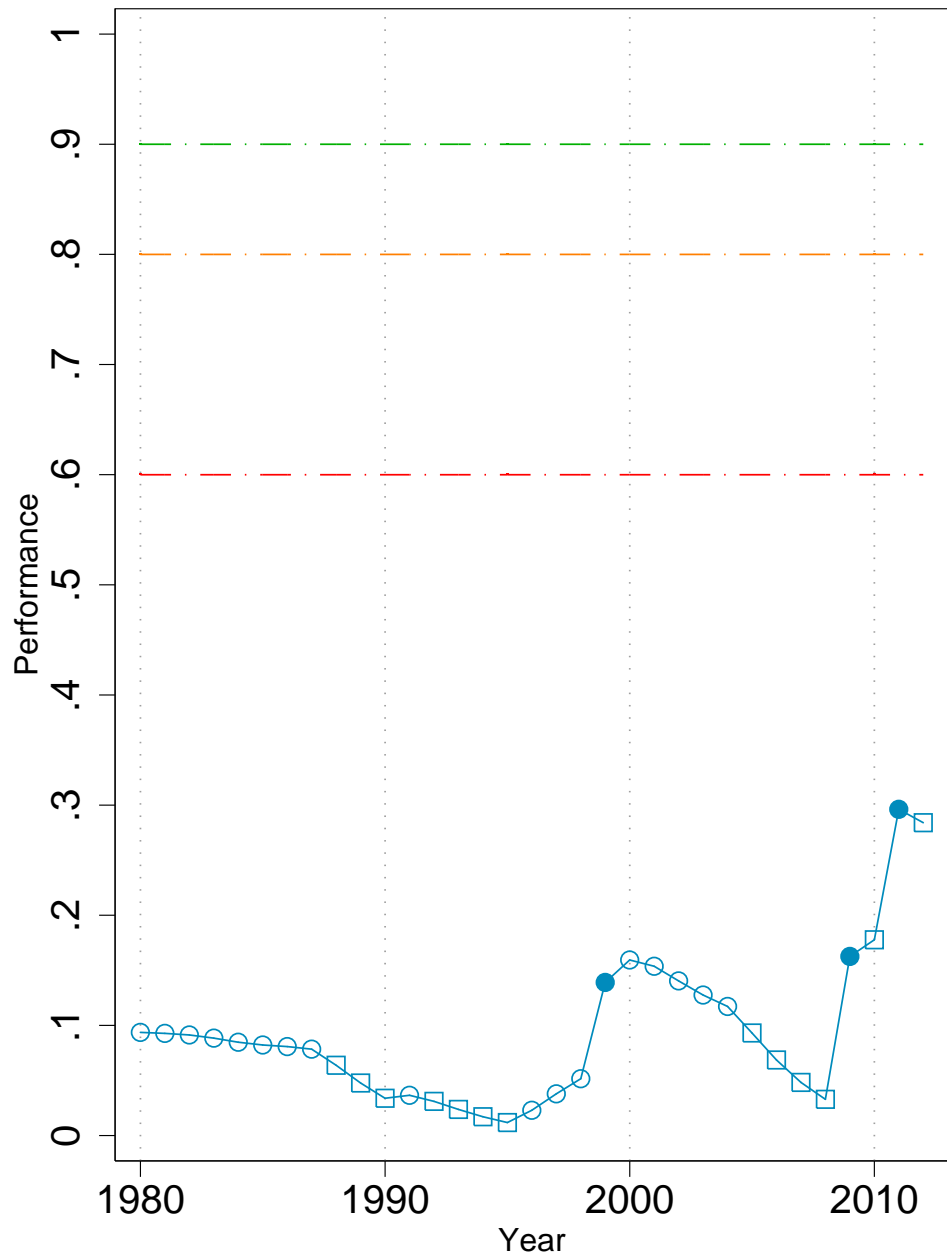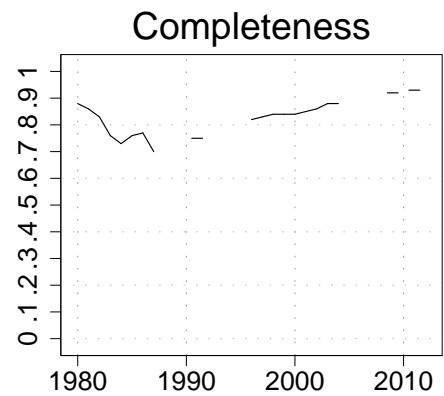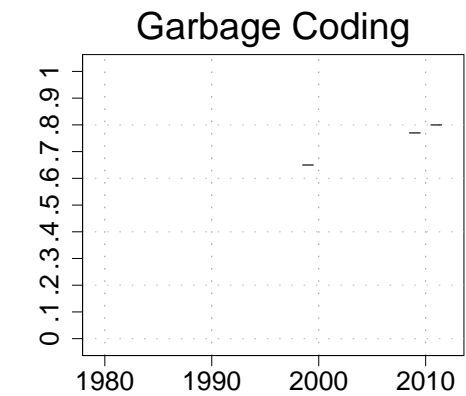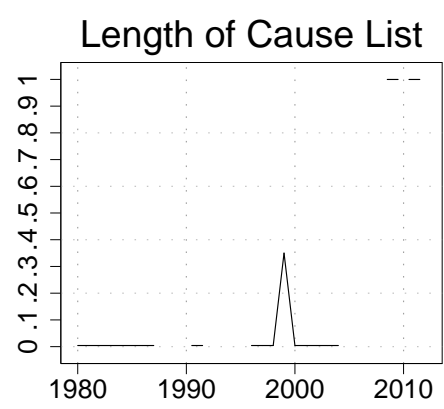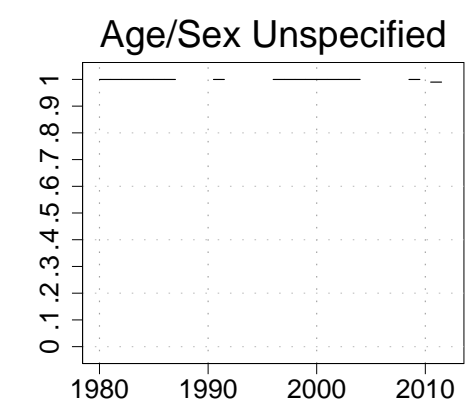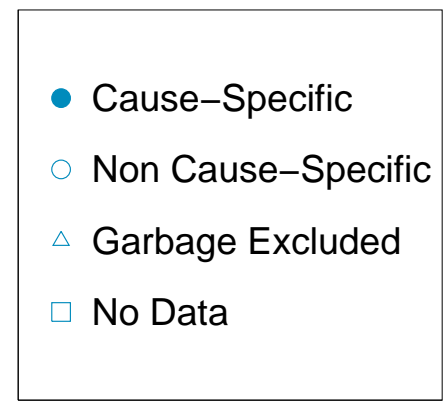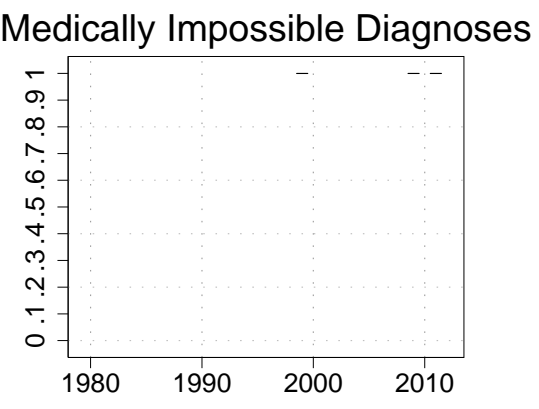

Indicators on their Original (Unweighted) Scale and Subtracted from One Where Necessary so Higher Scores are Preferable to Lower

# Finland

## VS Performance Index

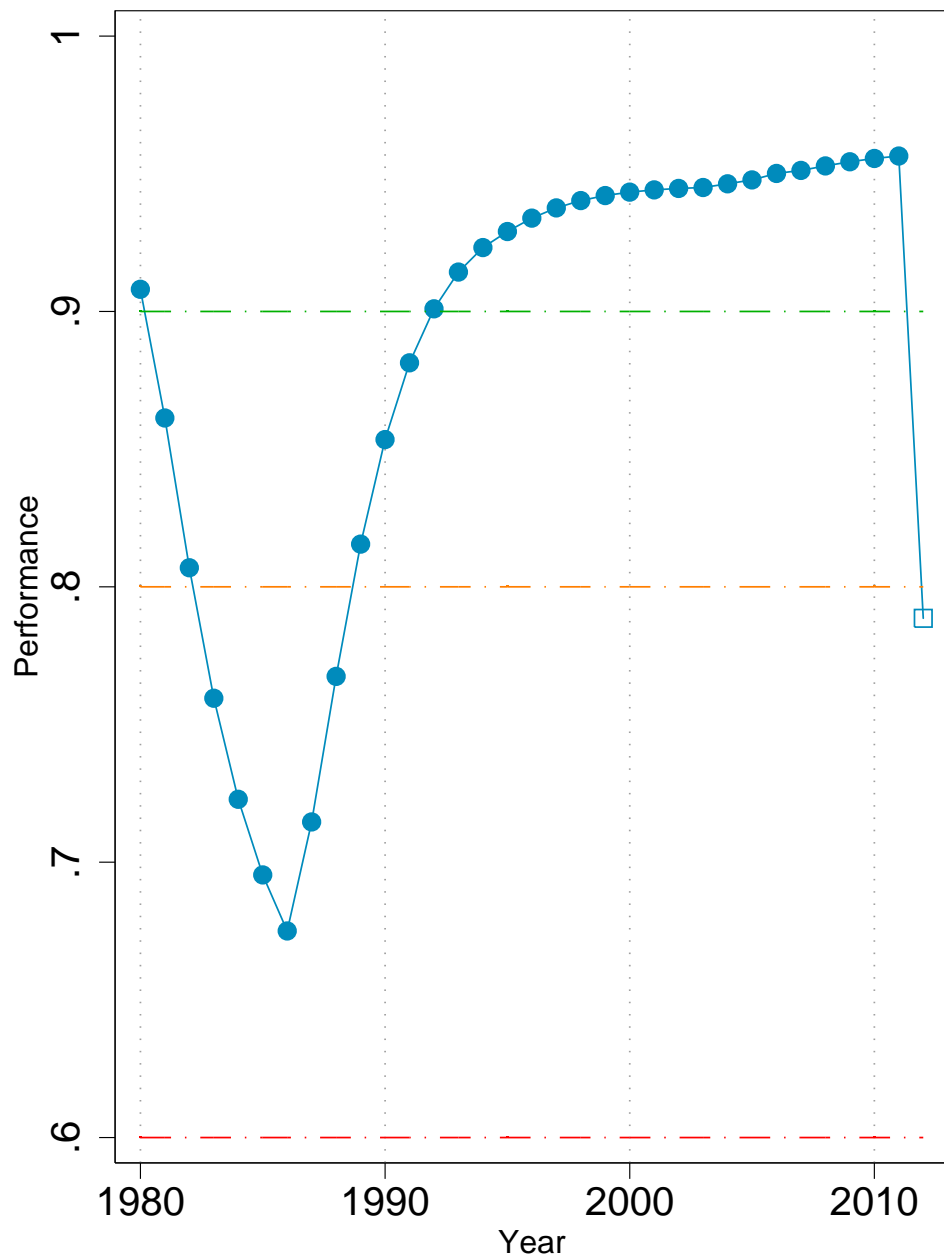

### Completeness

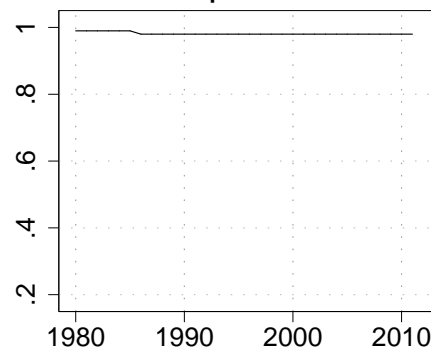

### Garbage Coding

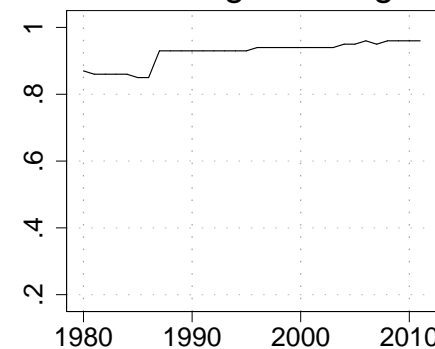

### Length of Cause List

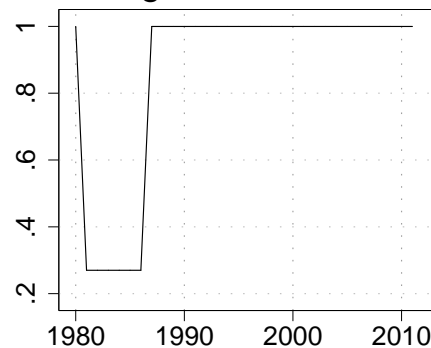

### Age/Sex Unspecified

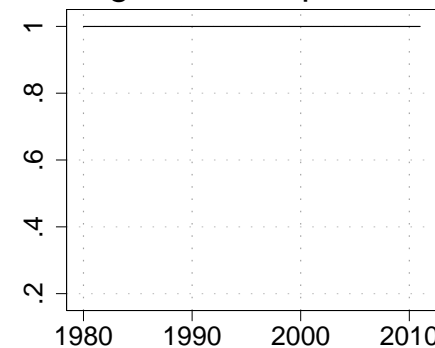

### Medically Impossible Diagnoses

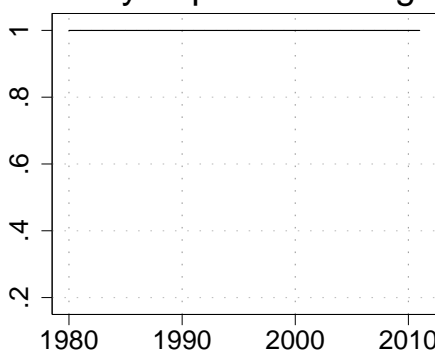

Indicators on their Original (Unweighted) Scale and Subtracted from One Where Necessary so Higher Scores are Preferable to Lower

# France

## VS Performance Index

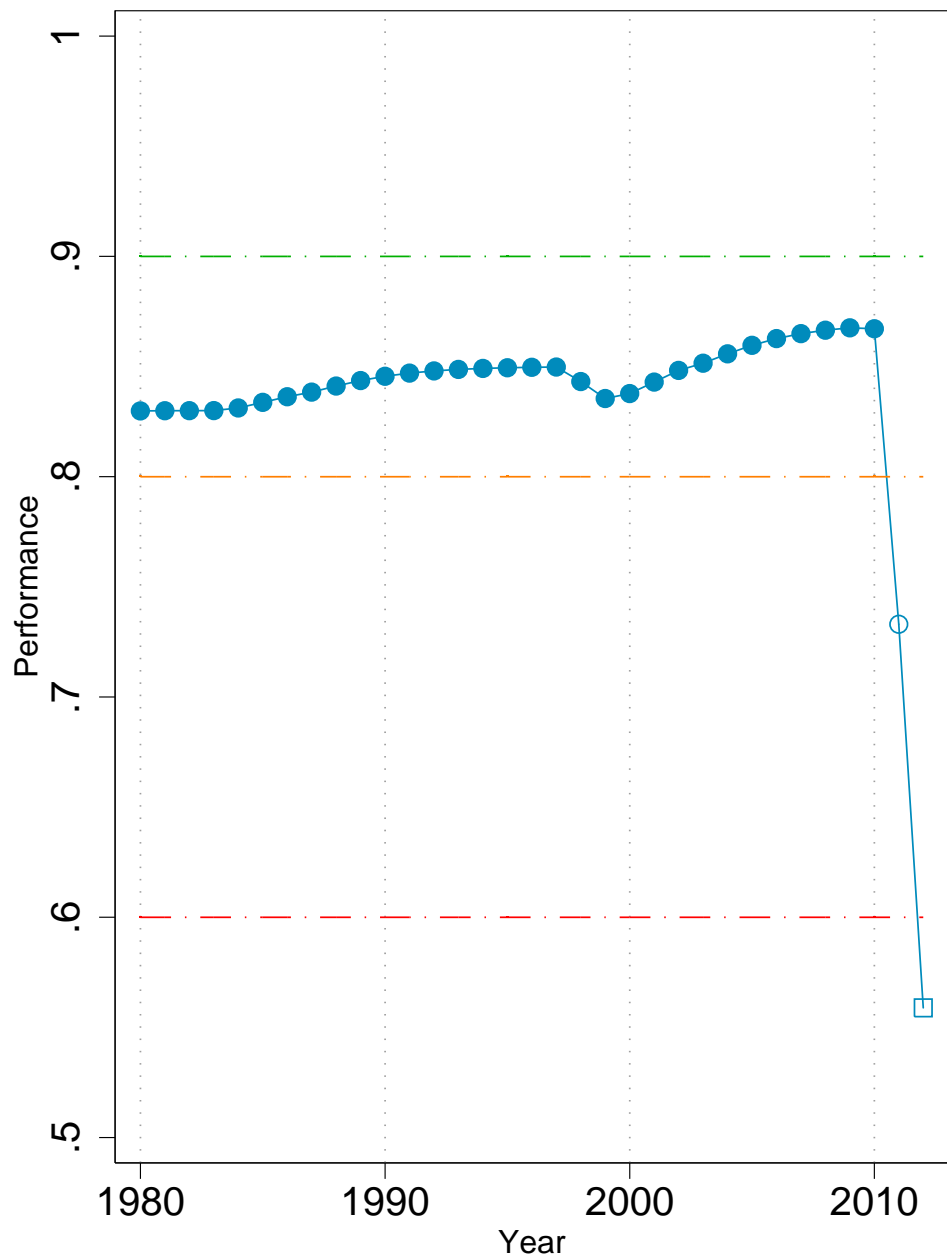

### Completeness

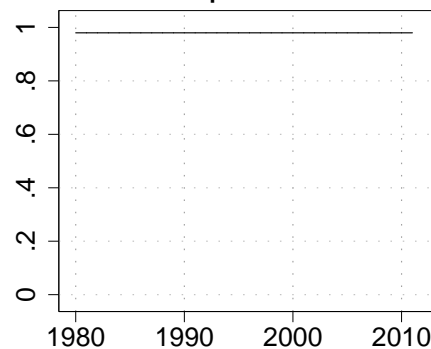

### Garbage Coding

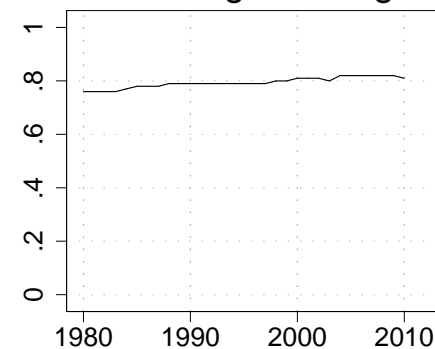

### Length of Cause List

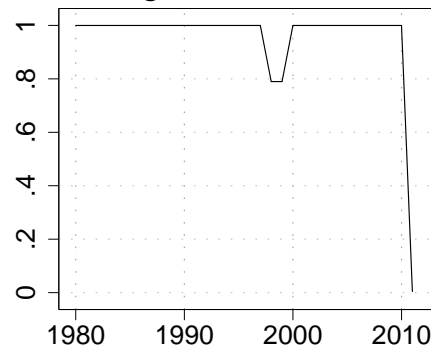

### Age/Sex Unspecified

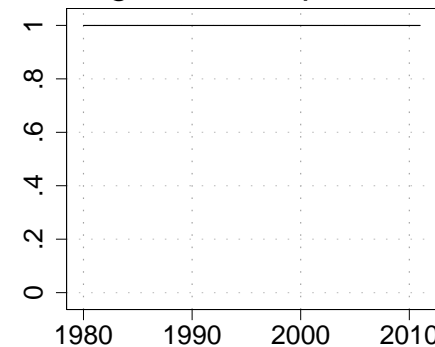

### Medically Impossible Diagnoses

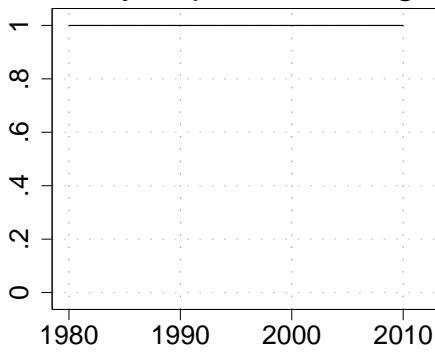

Indicators on their Original (Unweighted) Scale and Subtracted from One Where Necessary so Higher Scores are Preferable to Lower

# Gabon

## VS Performance Index

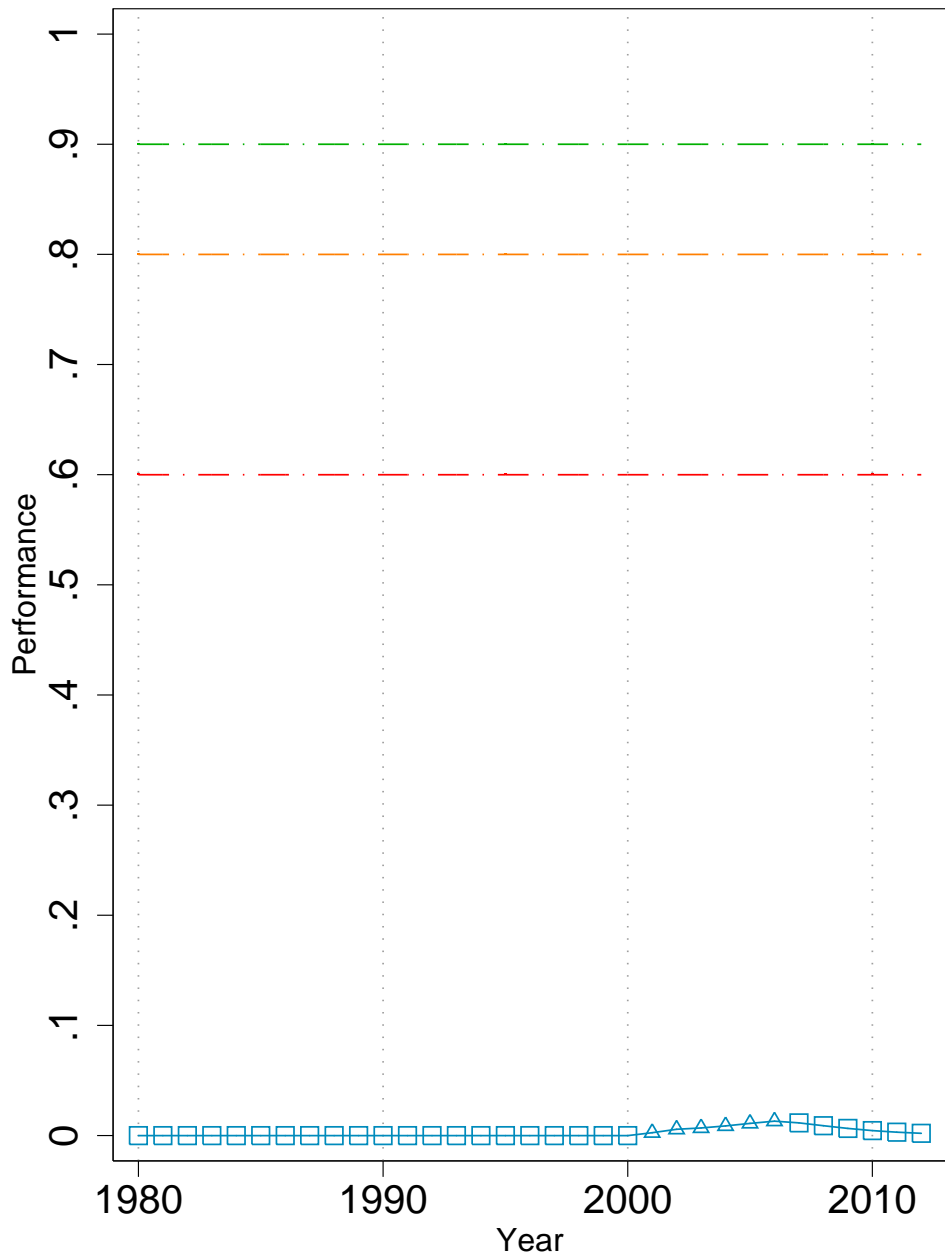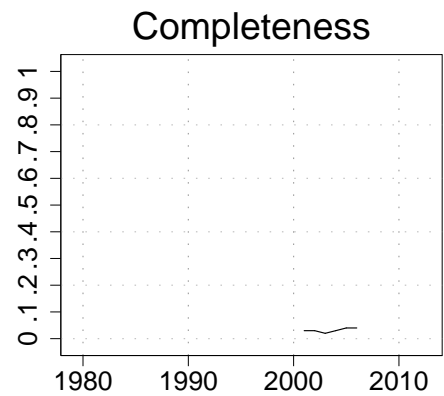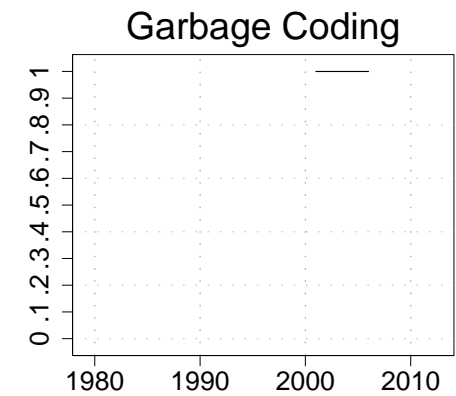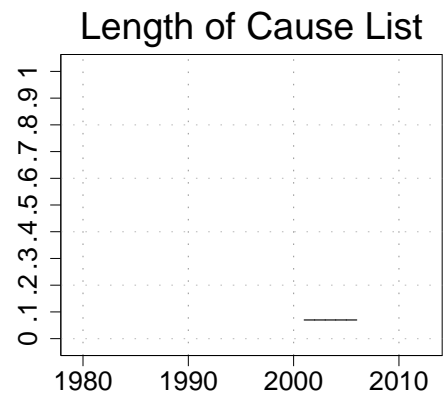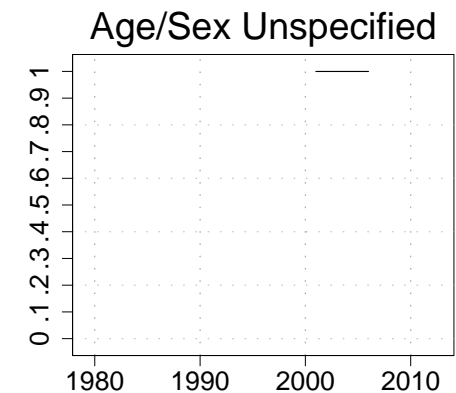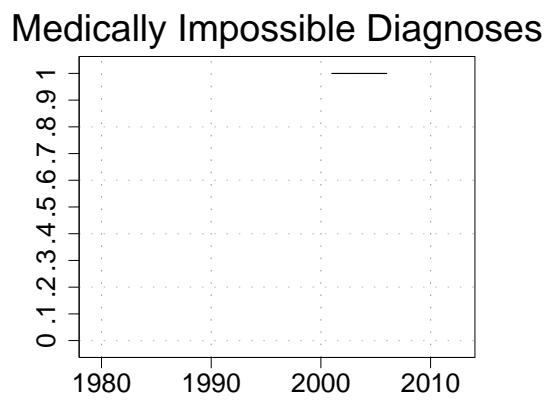

Indicators on their Original (Unweighted) Scale and Subtracted from One Where Necessary so Higher Scores are Preferable to Lower



# Georgia

## VS Performance Index

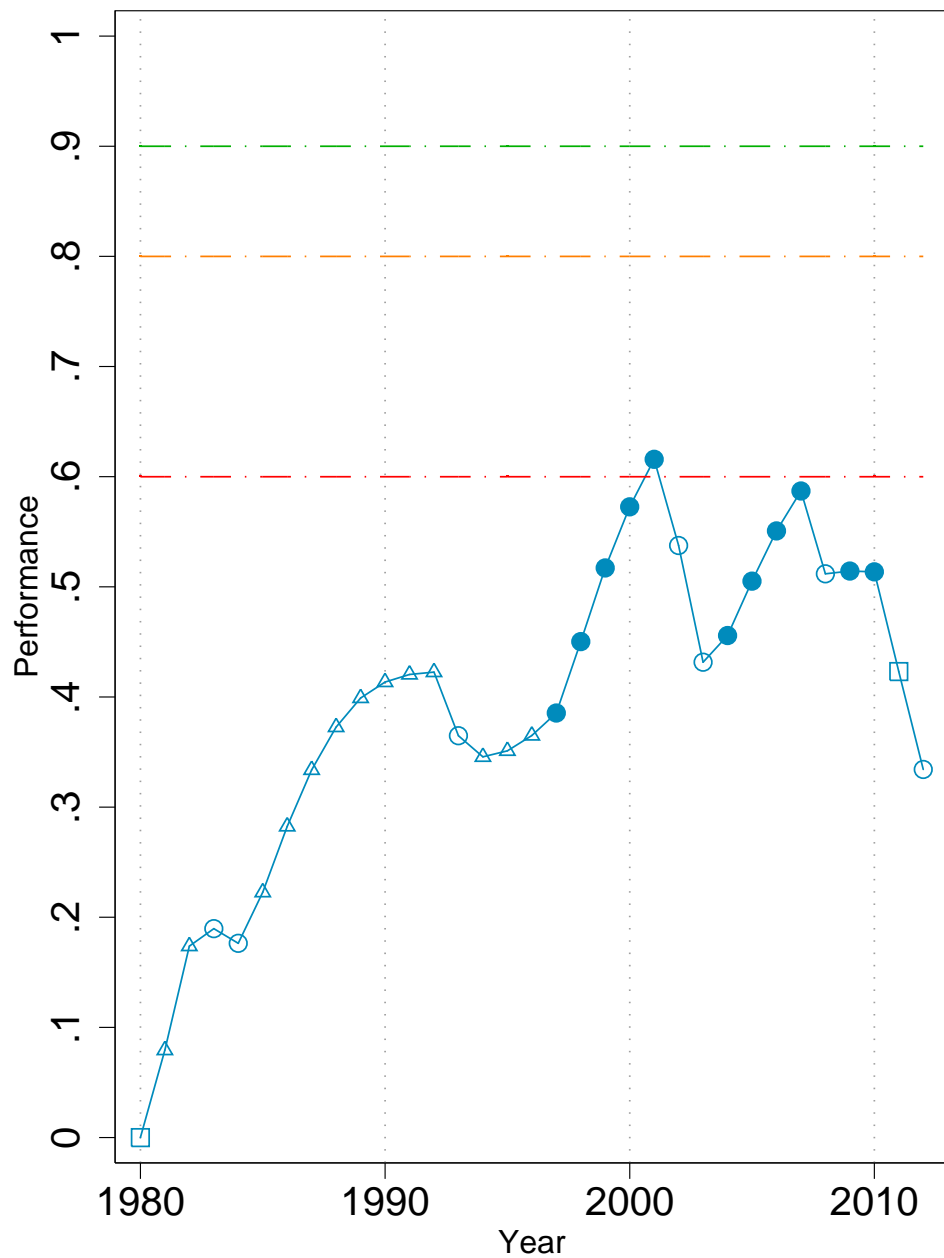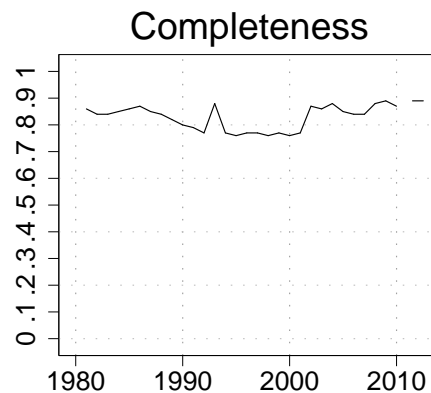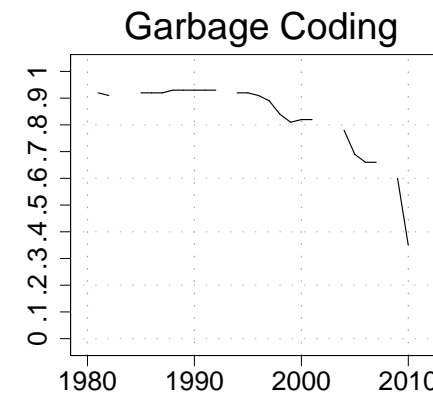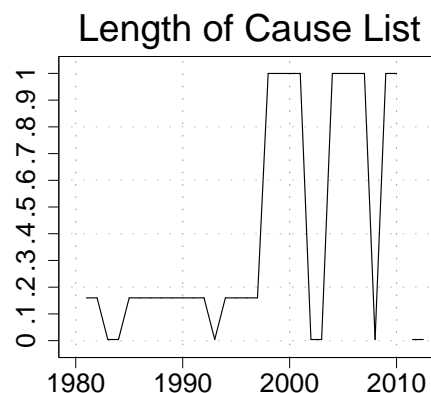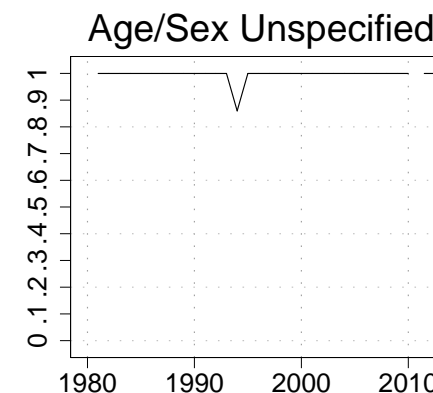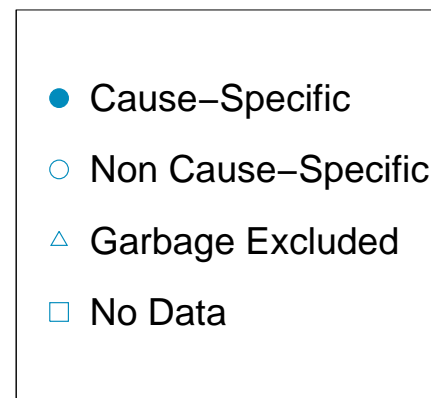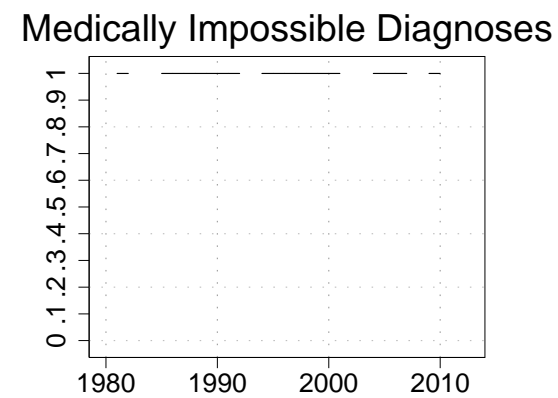

Indicators on their Original (Unweighted) Scale and Subtracted from One Where Necessary so Higher Scores are Preferable to Lower

# Germany

## VS Performance Index

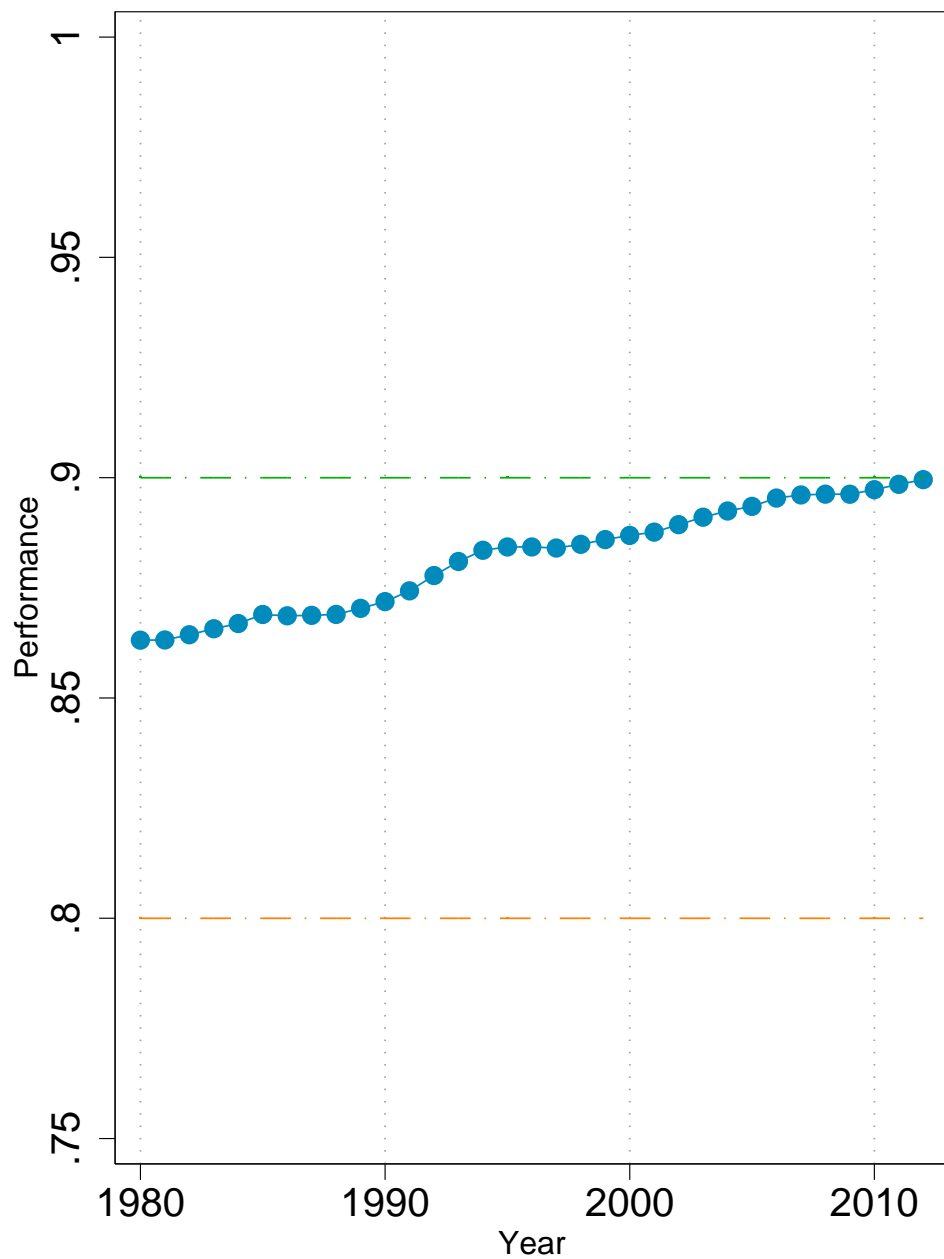

### Completeness

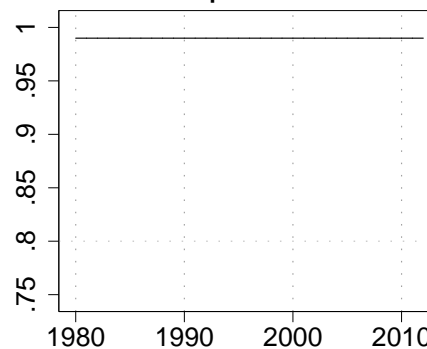

### Garbage Coding

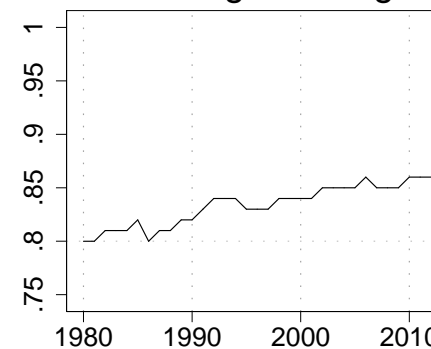

### Length of Cause List

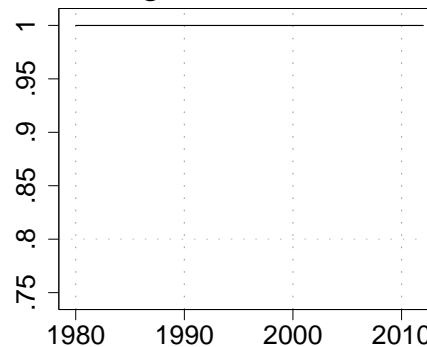

### Age/Sex Unspecified

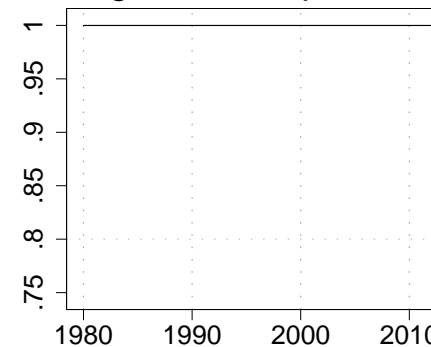

### Medically Impossible Diagnoses

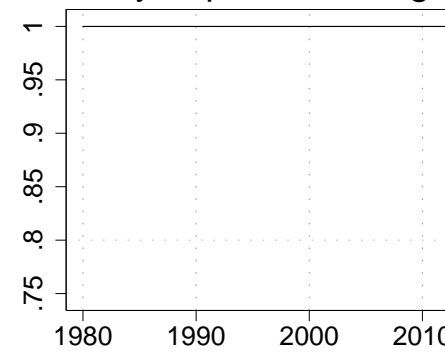

Indicators on their Original (Unweighted) Scale and Subtracted from One Where Necessary so Higher Scores are Preferable to Lower

# Ghana

## VS Performance Index

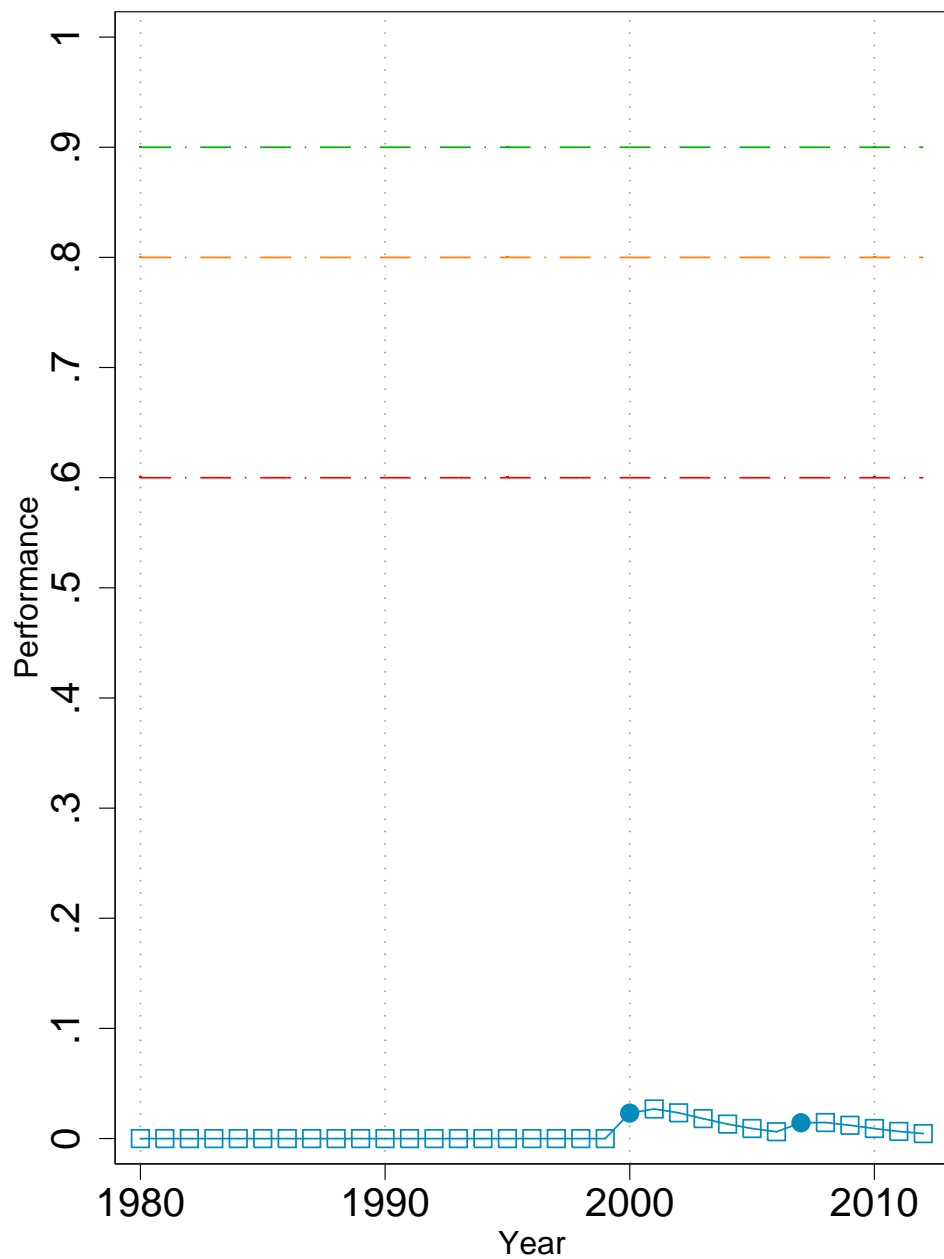

### Completeness

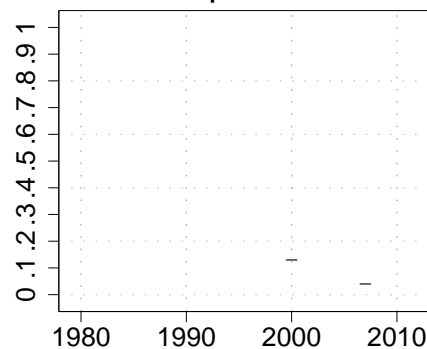

### Garbage Coding

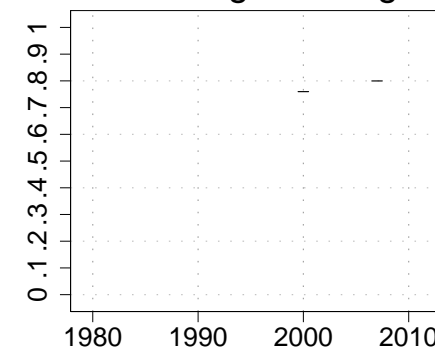

### Length of Cause List

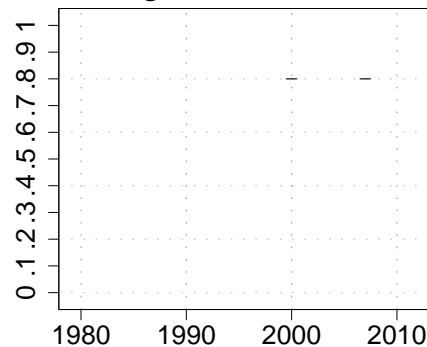

### Age/Sex Unspecified

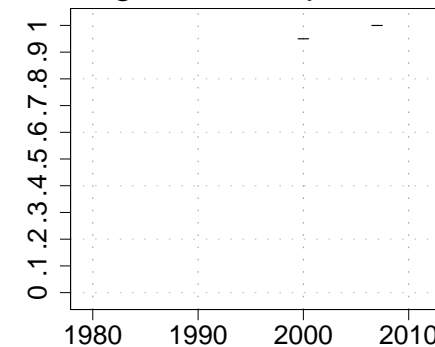

### Medically Impossible Diagnoses

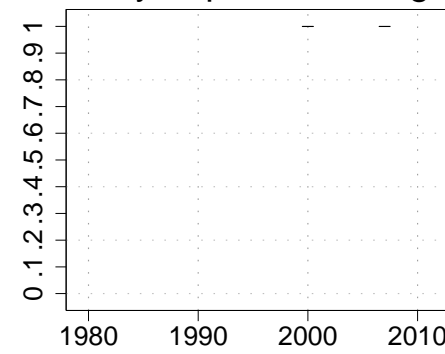

Indicators on their Original (Unweighted) Scale and Subtracted from One Where Necessary so Higher Scores are Preferable to Lower

# Greece

## VS Performance Index

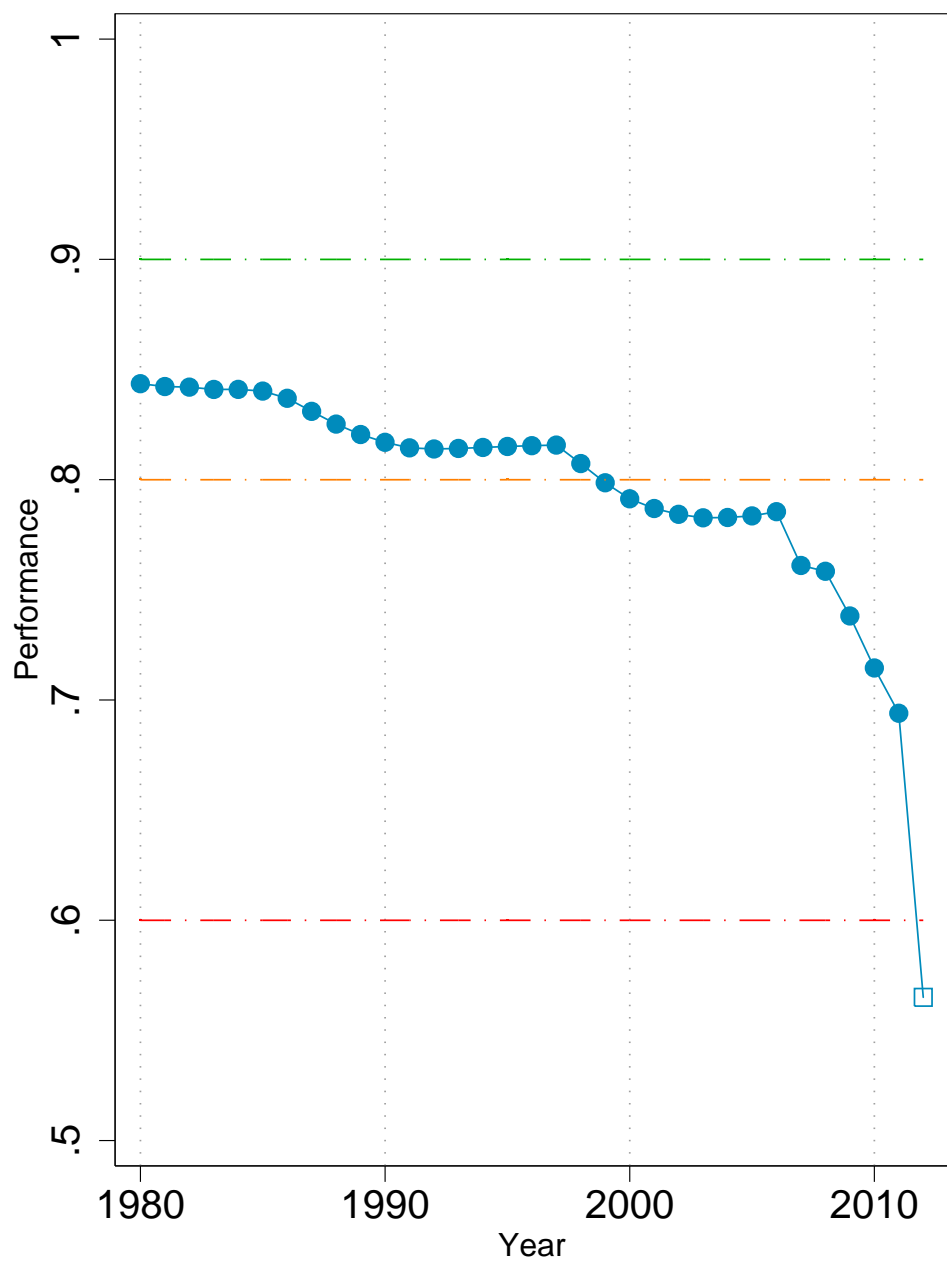

### Completeness

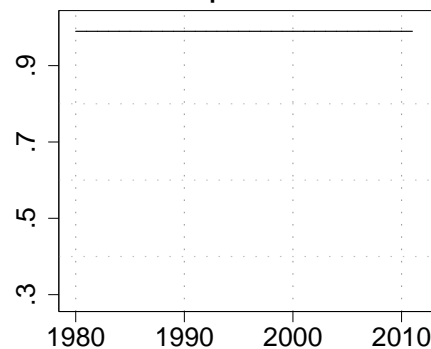

### Garbage Coding

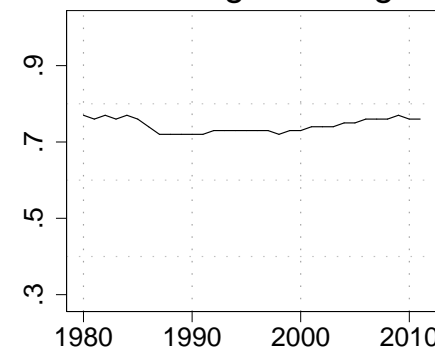

### Length of Cause List

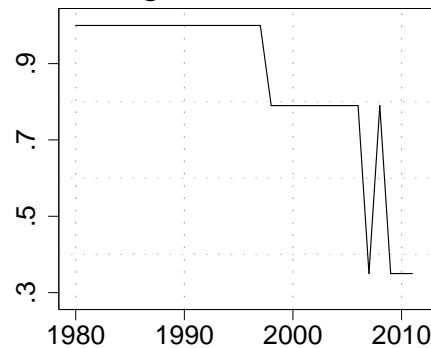

### Age/Sex Unspecified

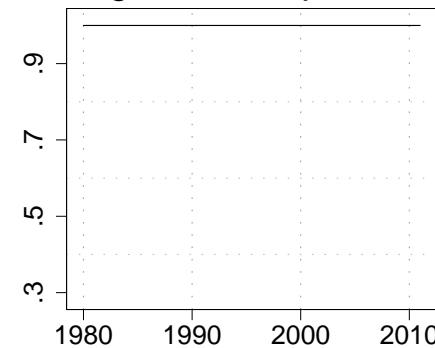

### Medically Impossible Diagnoses

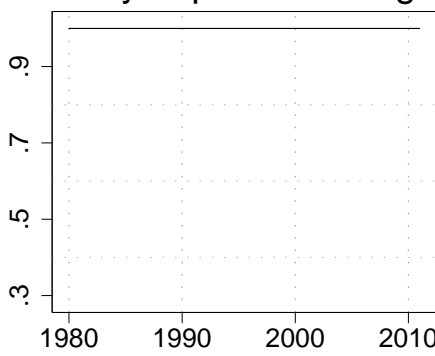

Indicators on their Original (Unweighted) Scale and Subtracted from One Where Necessary so Higher Scores are Preferable to Lower

# Grenada

## VS Performance Index

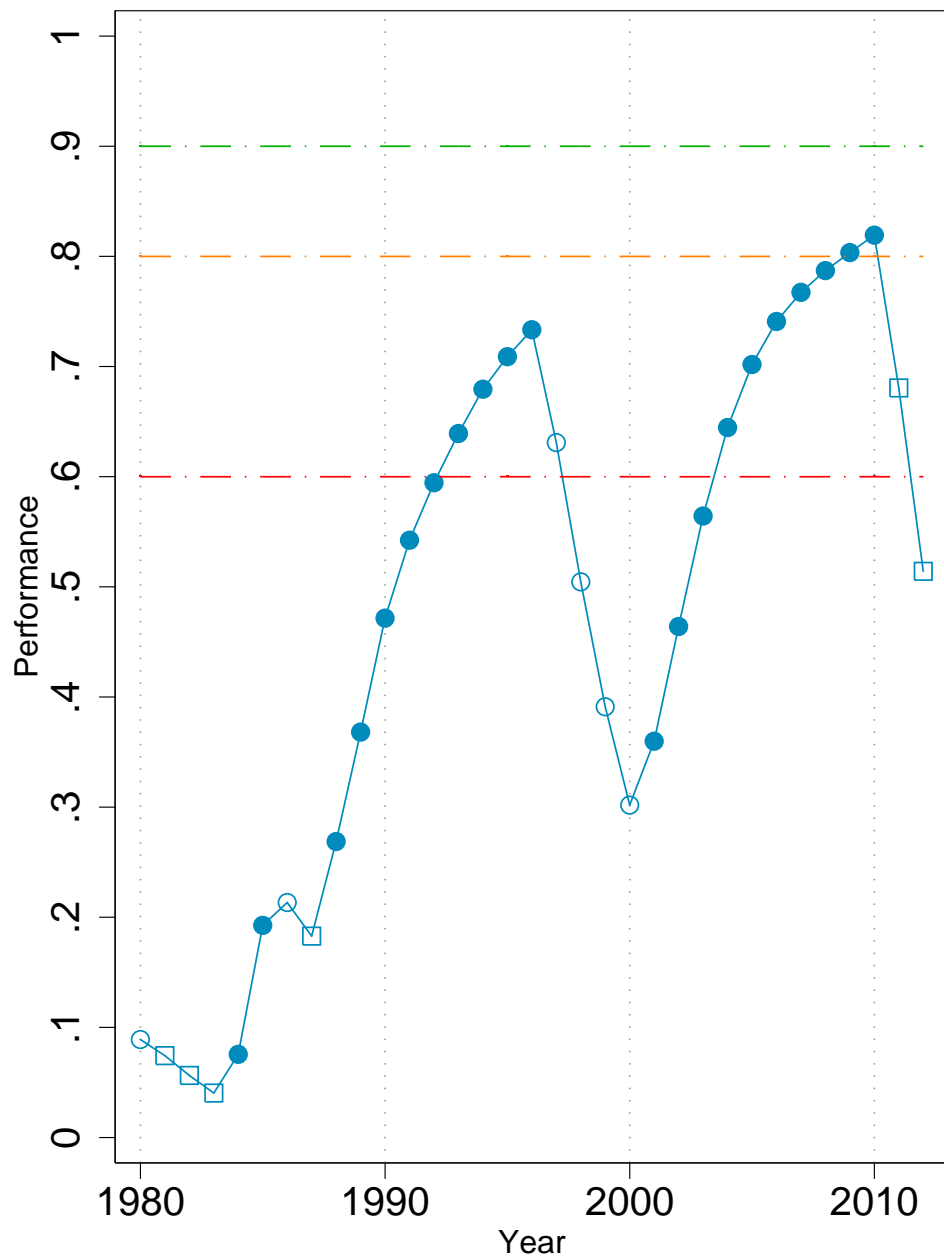

### Completeness

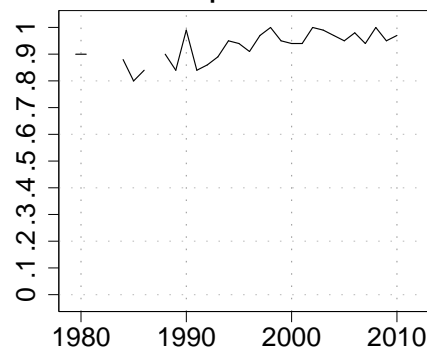

### Garbage Coding

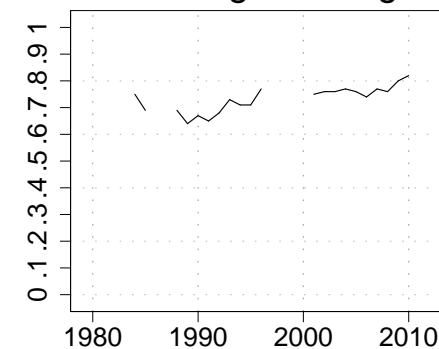

### Length of Cause List

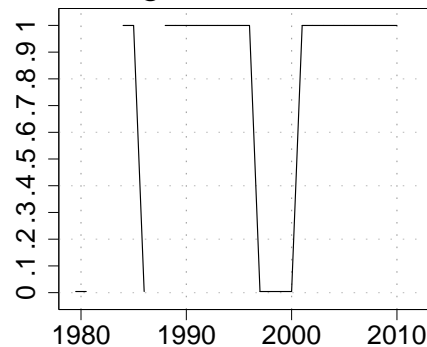

### Age/Sex Unspecified

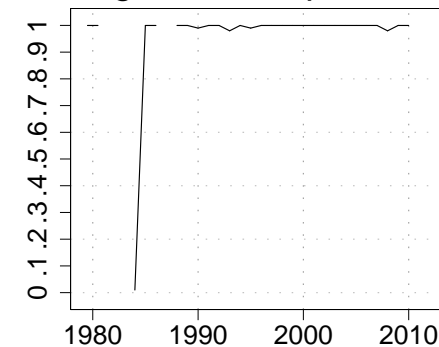

### Medically Impossible Diagnoses

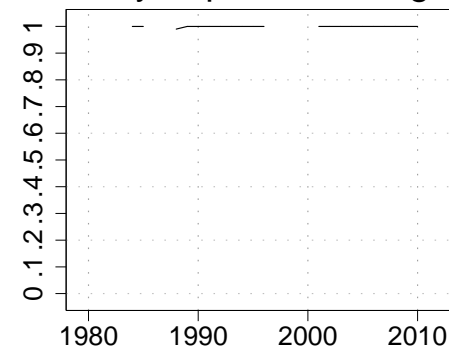

Indicators on their Original (Unweighted) Scale and Subtracted from One Where Necessary so Higher Scores are Preferable to Lower

# Guatemala

## VS Performance Index

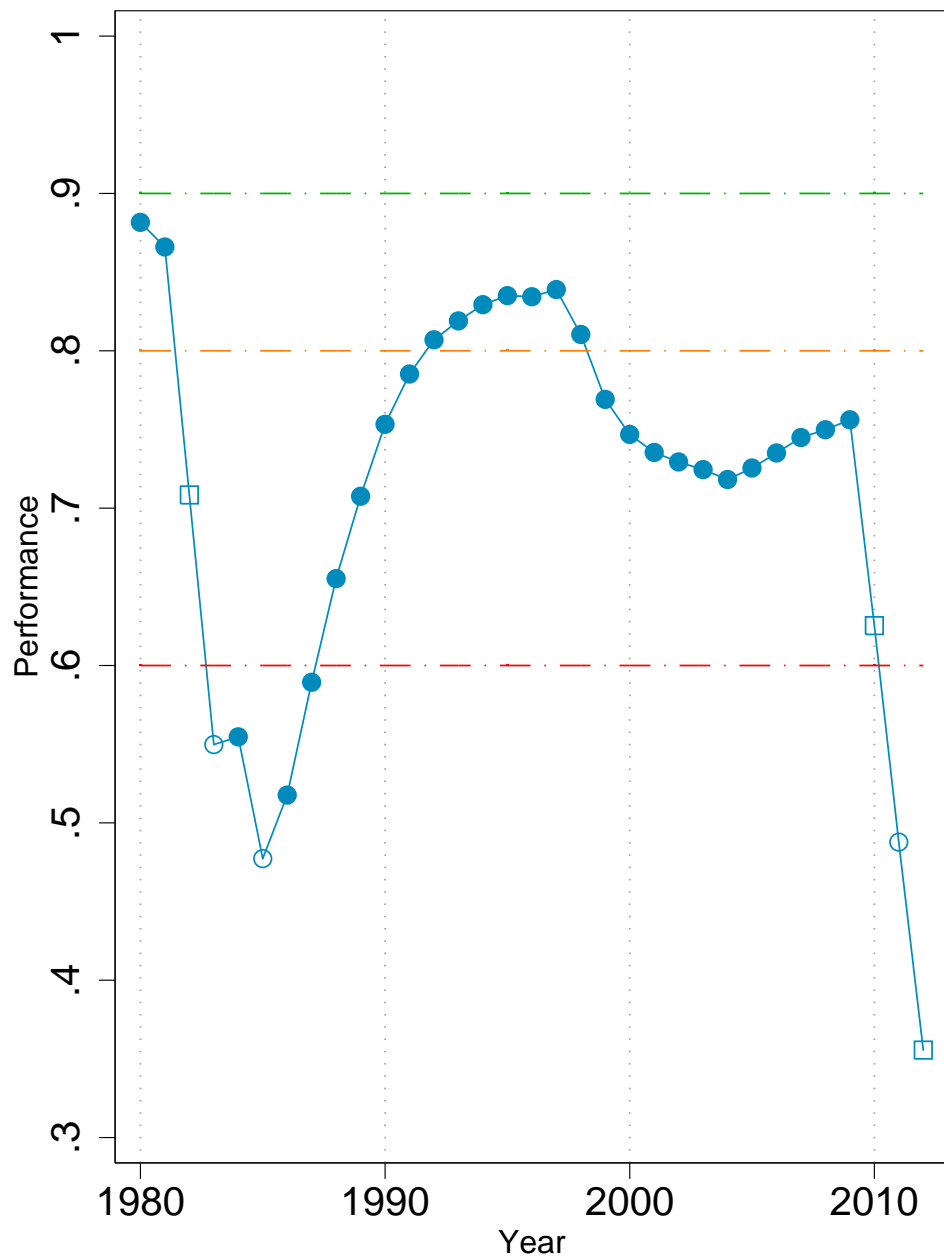

### Completeness

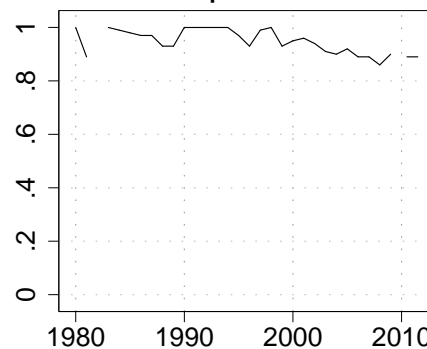

### Garbage Coding

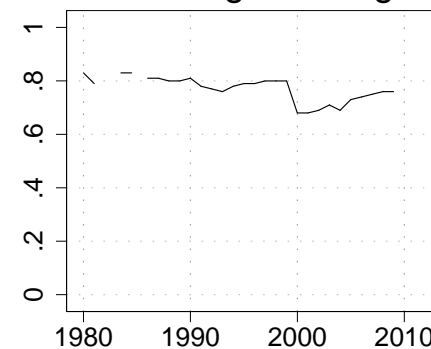

### Length of Cause List

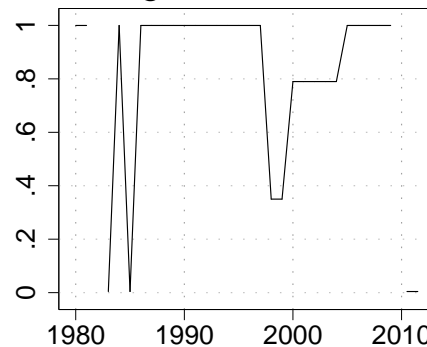

### Age/Sex Unspecified

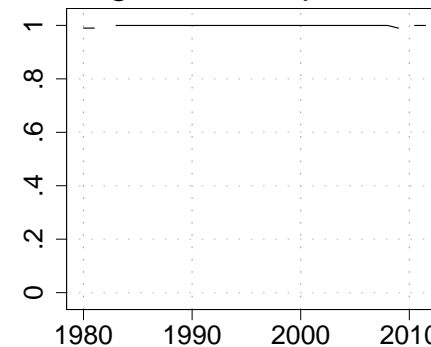

### Medically Impossible Diagnoses

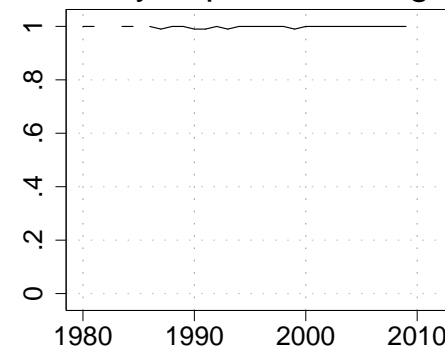

Indicators on their Original (Unweighted) Scale and Subtracted from One Where Necessary so Higher Scores are Preferable to Lower

# Guyana

## VS Performance Index

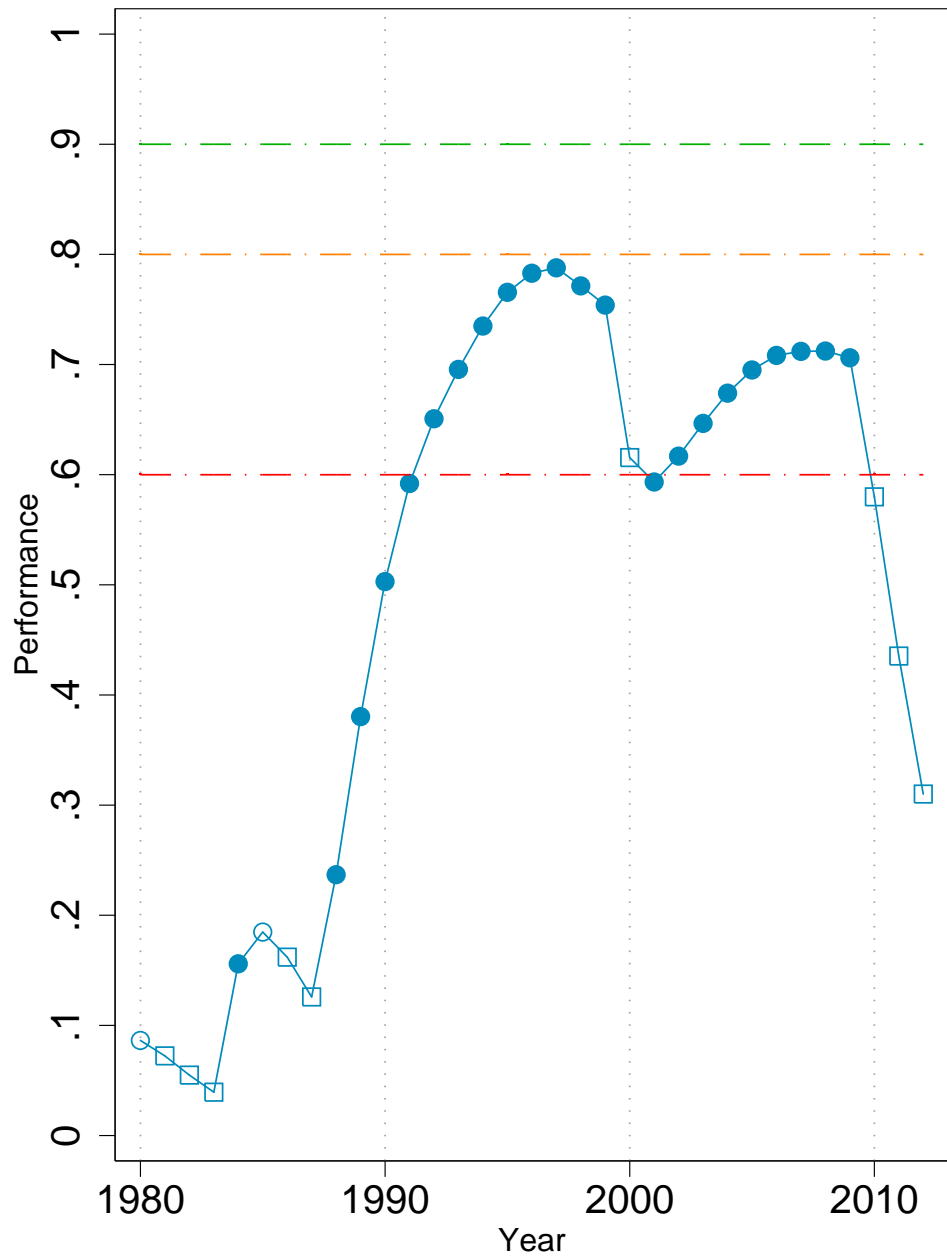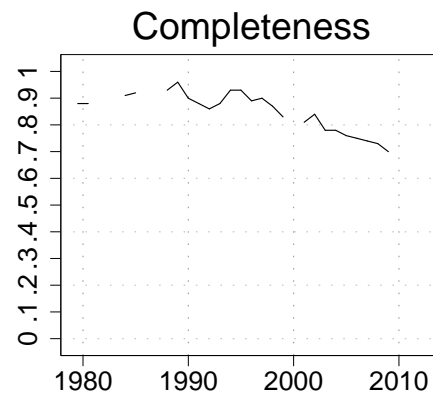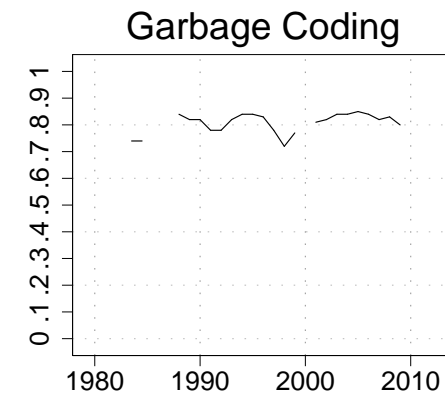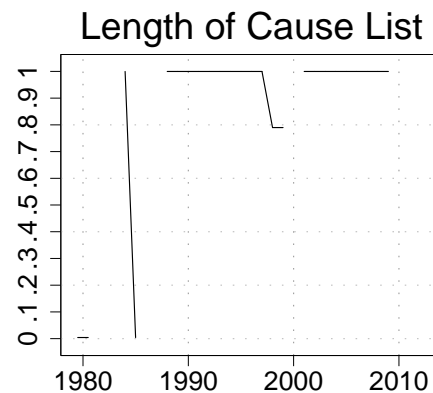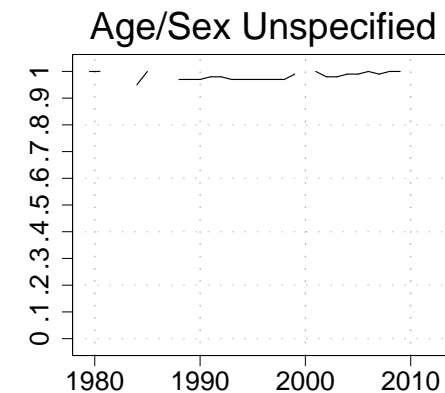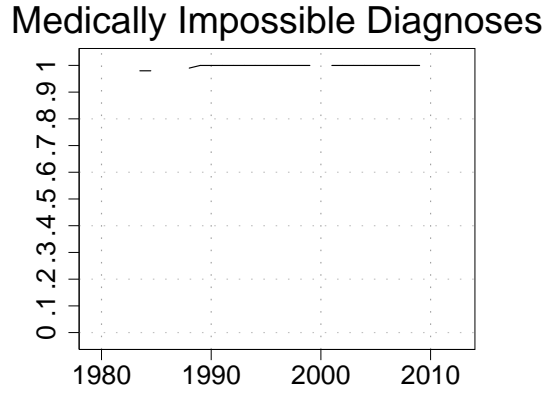

Indicators on their Original (Unweighted) Scale and Subtracted from One Where Necessary so Higher Scores are Preferable to Lower

# Haiti

## VS Performance Index

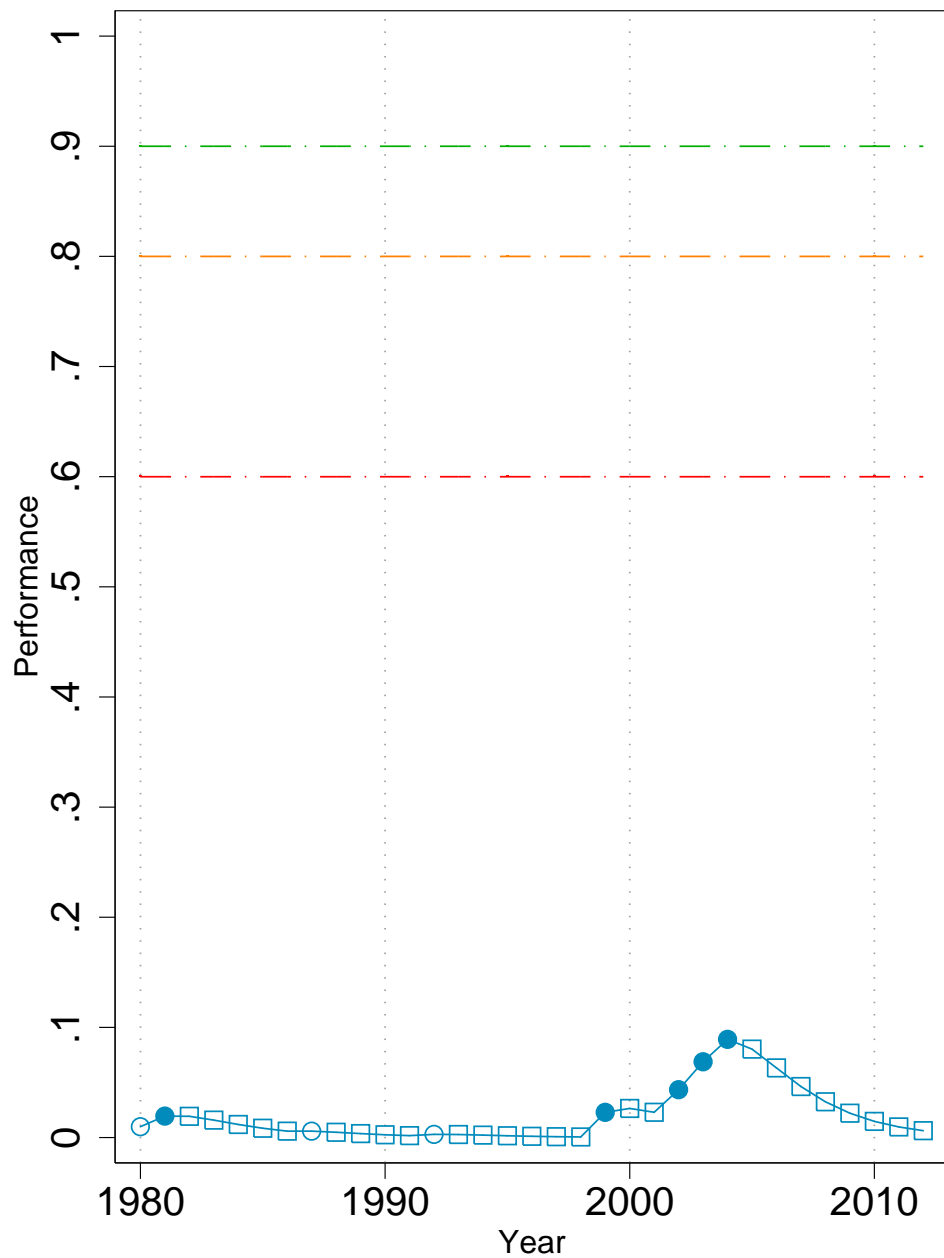

## Completeness

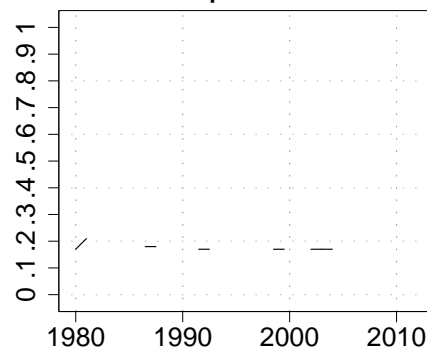

## Garbage Coding

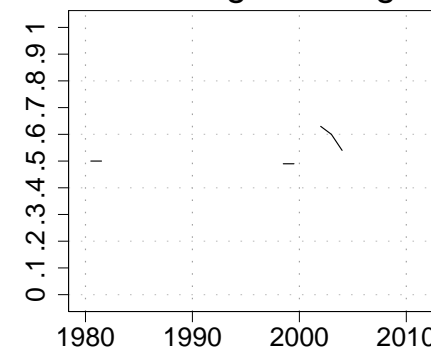

## Length of Cause List

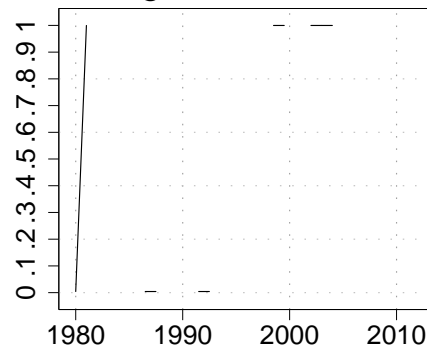

## Age/Sex Unspecified

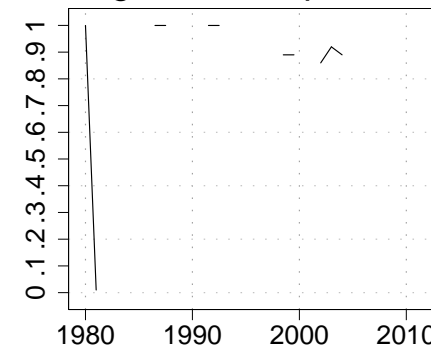

## Medically Impossible Diagnoses

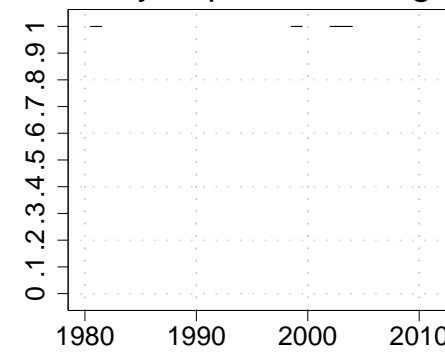

Indicators on their Original (Unweighted) Scale and Subtracted from One Where Necessary so Higher Scores are Preferable to Lower



# Honduras

## VS Performance Index

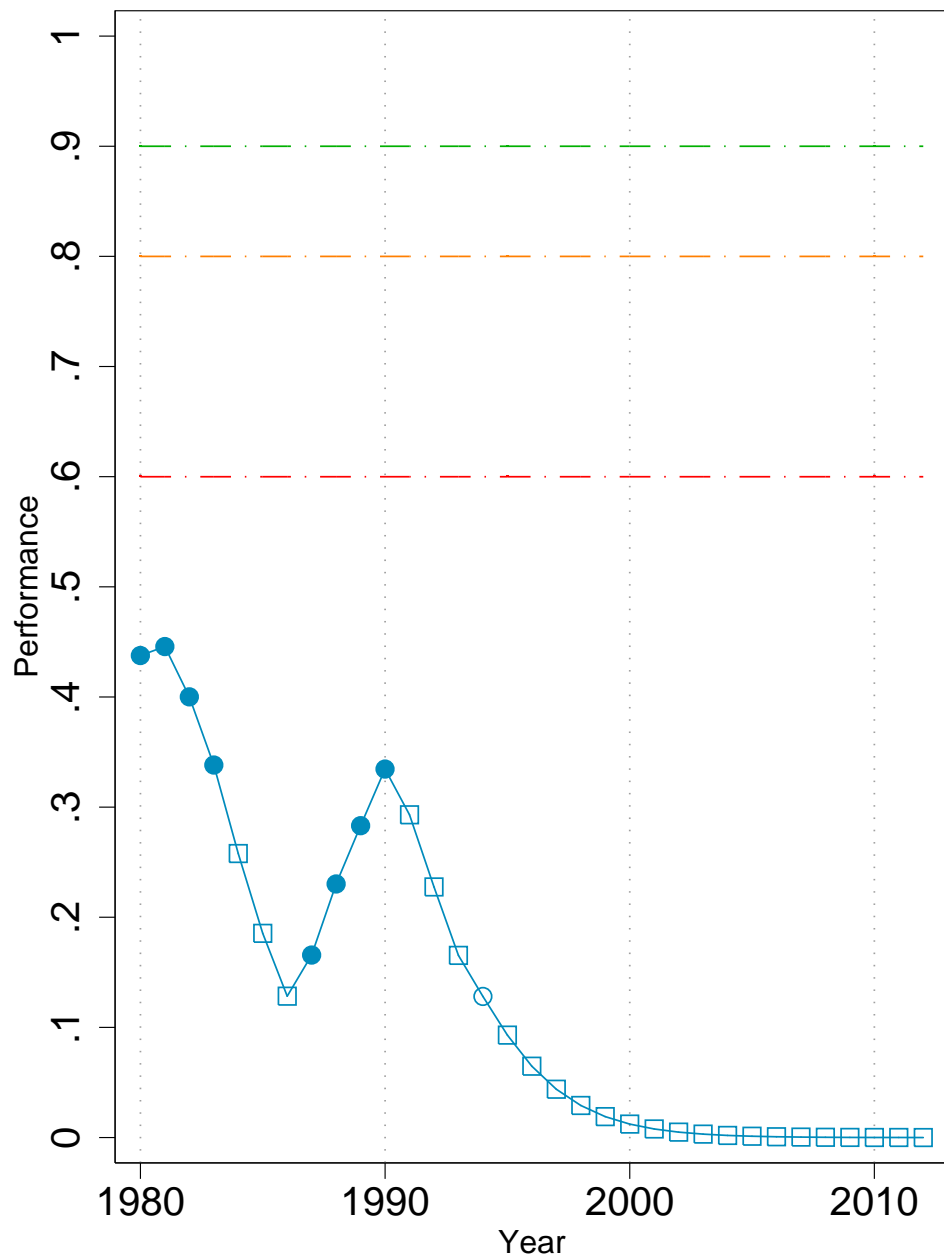

### Completeness

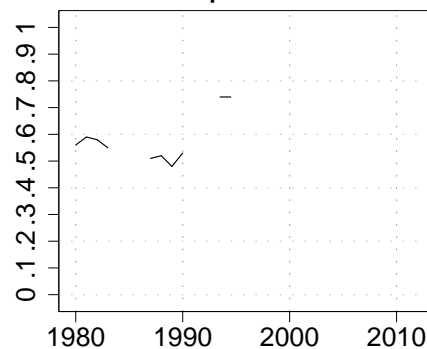

### Garbage Coding

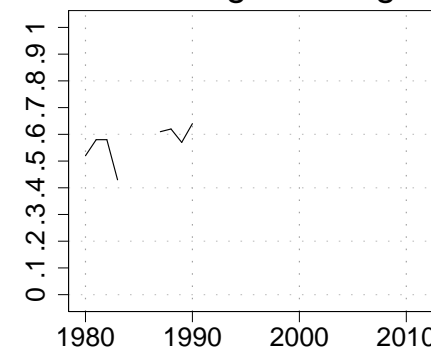

### Length of Cause List

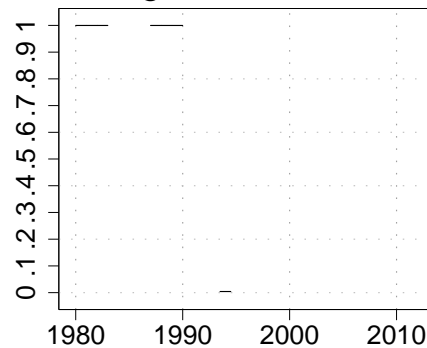

### Age/Sex Unspecified

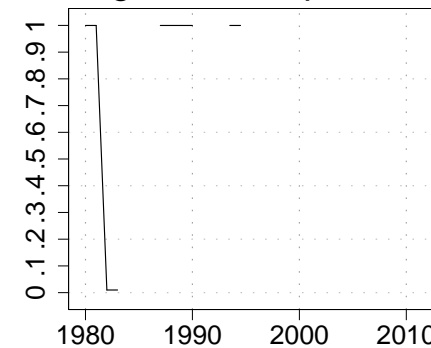

### Medically Impossible Diagnoses

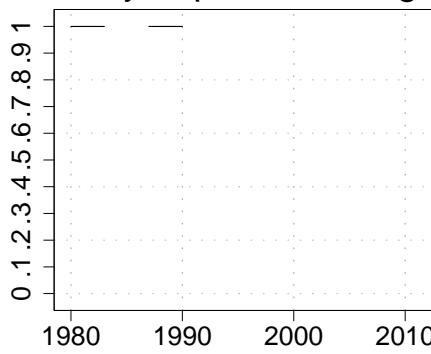

Indicators on their Original (Unweighted) Scale and Subtracted from One Where Necessary so Higher Scores are Preferable to Lower

# Hong Kong VS Performance Index

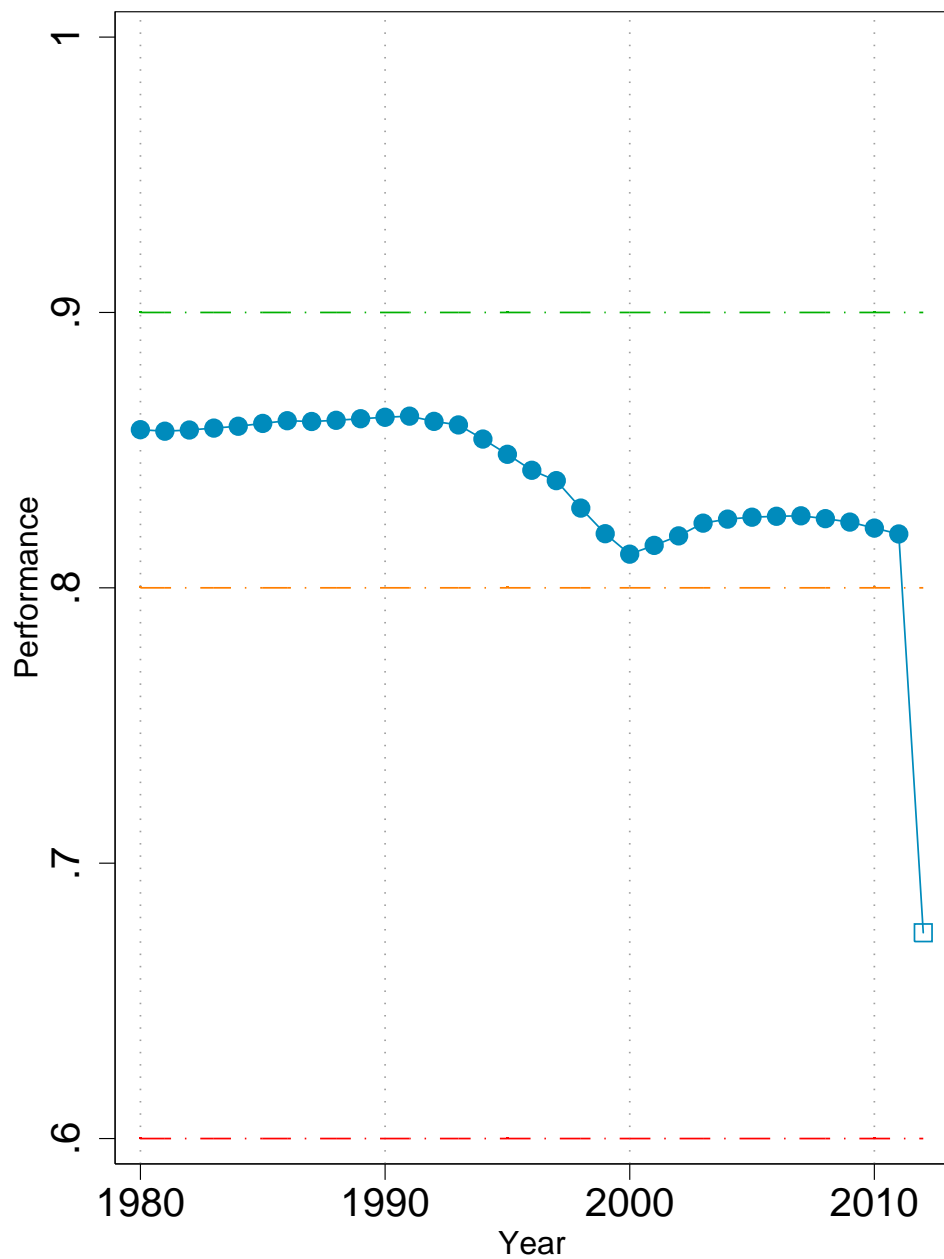

Completeness

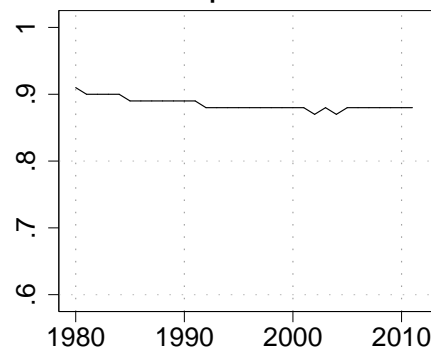

Garbage Coding

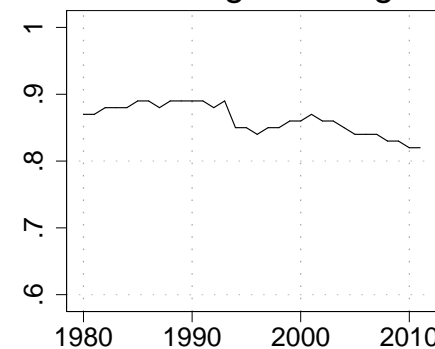

Length of Cause List

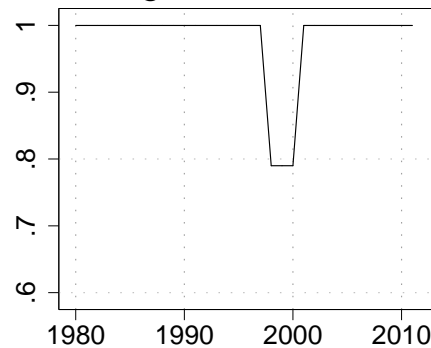

Age/Sex Unspecified

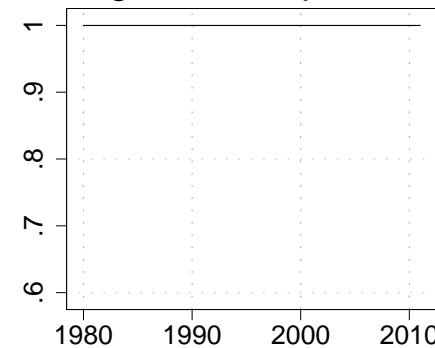

Medically Impossible Diagnoses

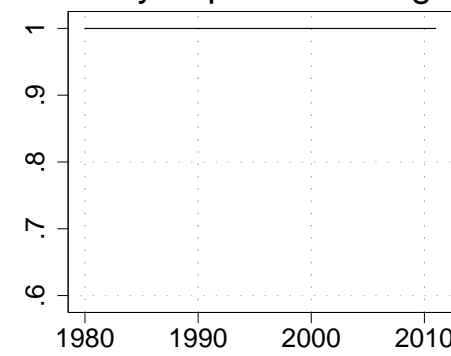

Indicators on their Original (Unweighted) Scale and Subtracted from One Where Necessary so Higher Scores are Preferable to Lower

# Hungary

## VS Performance Index

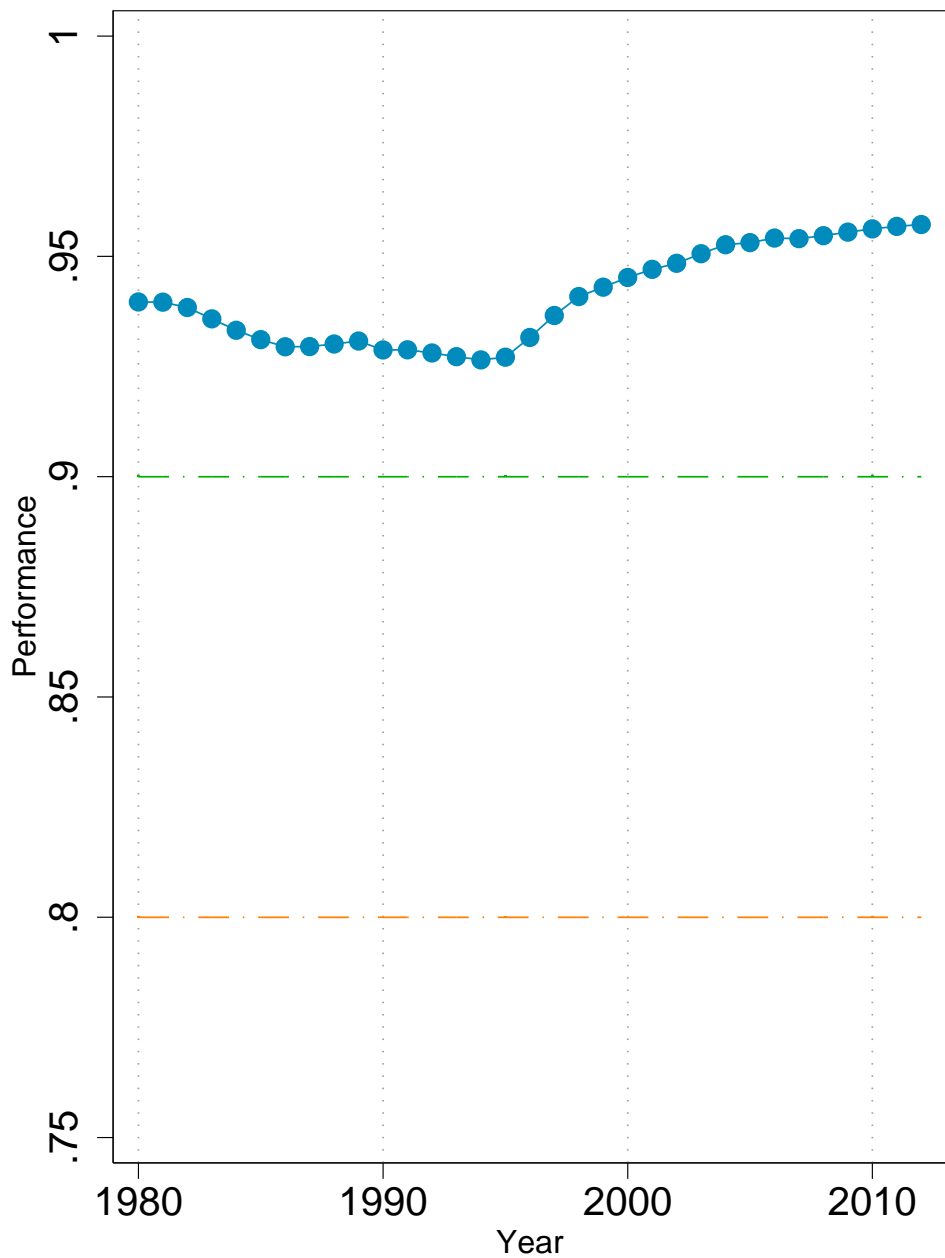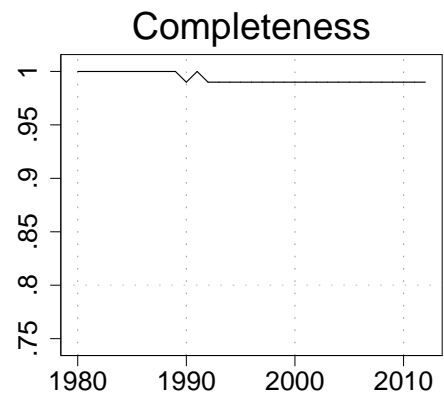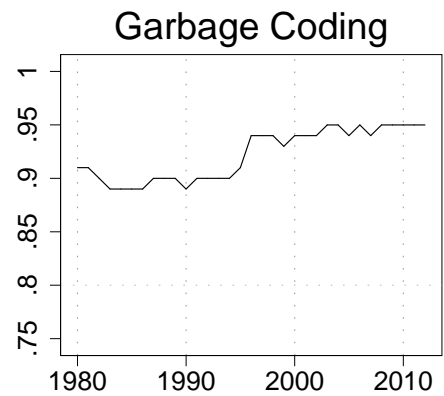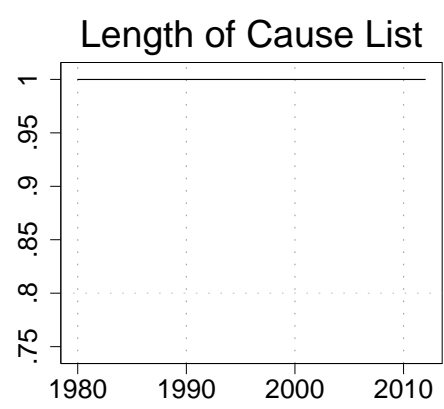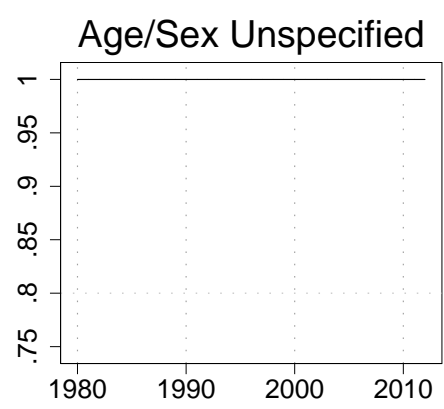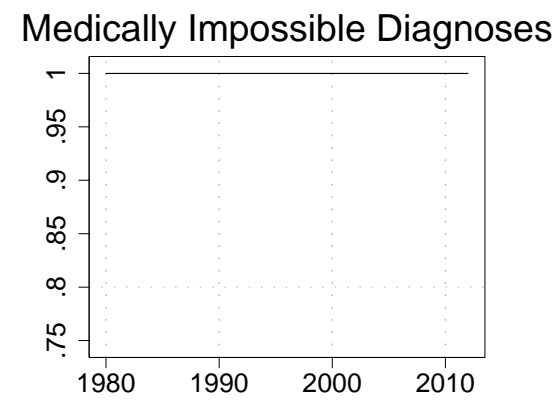

Indicators on their Original (Unweighted) Scale and Subtracted from One Where Necessary so Higher Scores are Preferable to Lower

# Iceland

## VS Performance Index

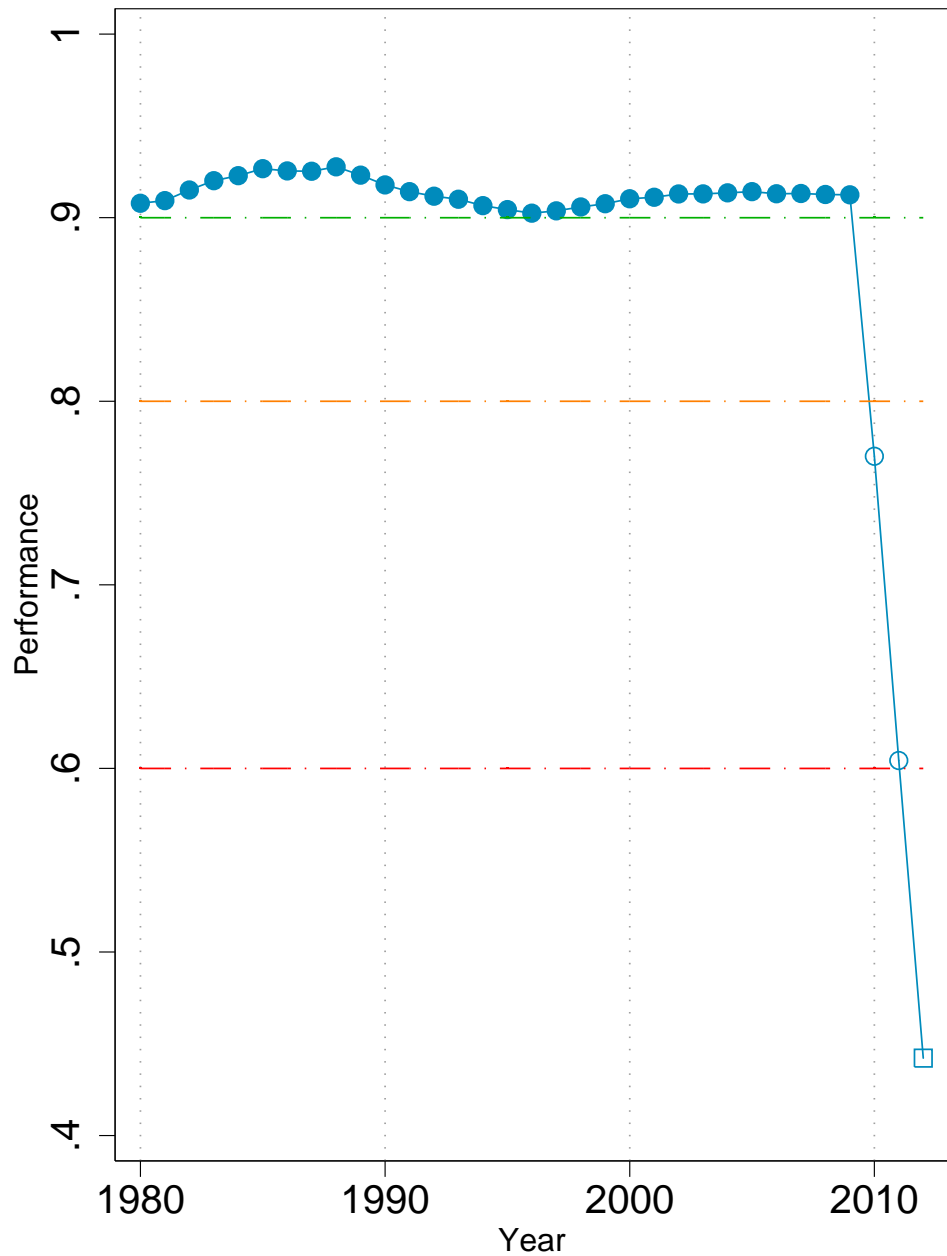

### Completeness

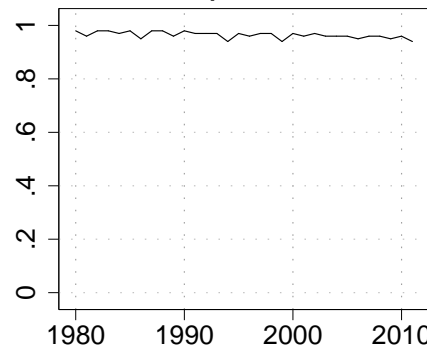

### Garbage Coding

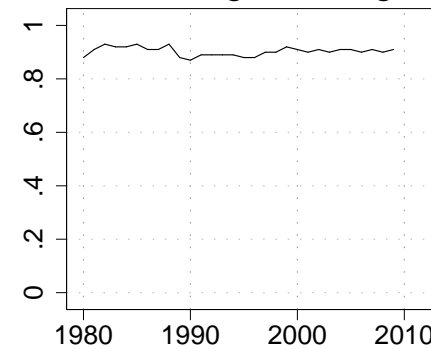

### Length of Cause List

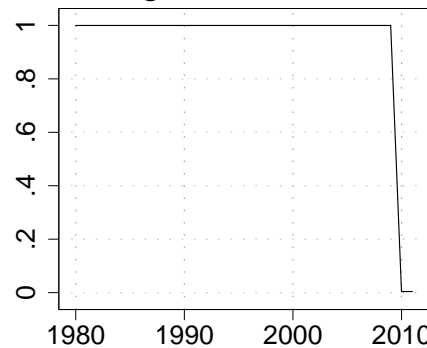

### Age/Sex Unspecified



### Medically Impossible Diagnoses

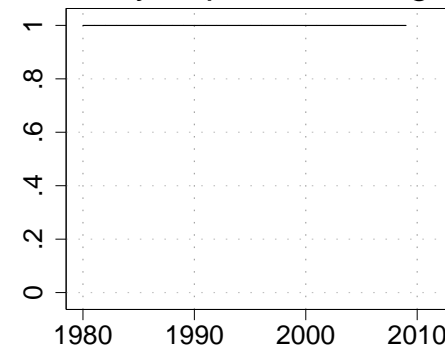

Indicators on their Original (Unweighted) Scale and Subtracted from One Where Necessary so Higher Scores are Preferable to Lower

# India

## VS Performance Index

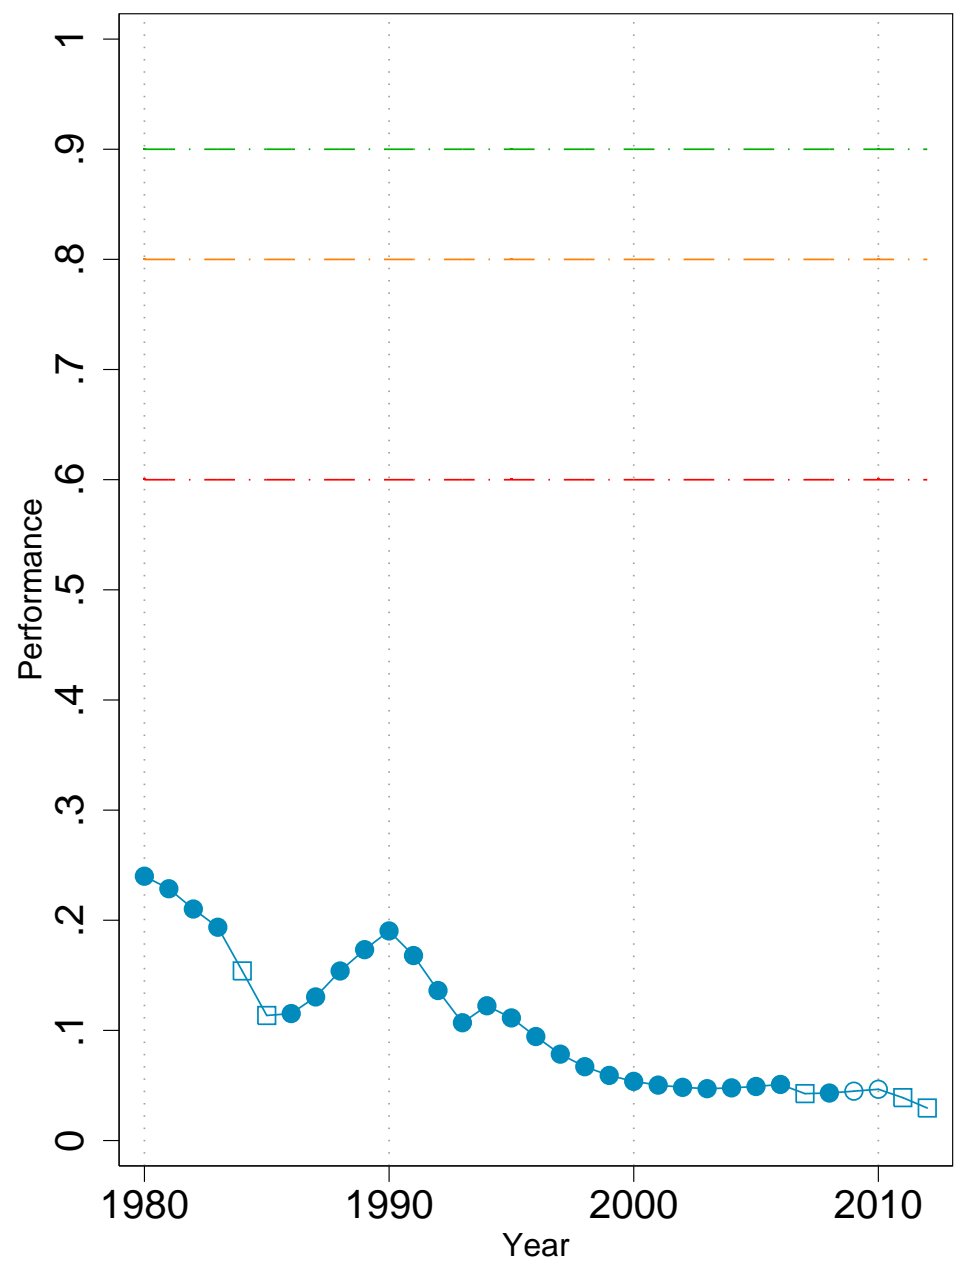

### Completeness

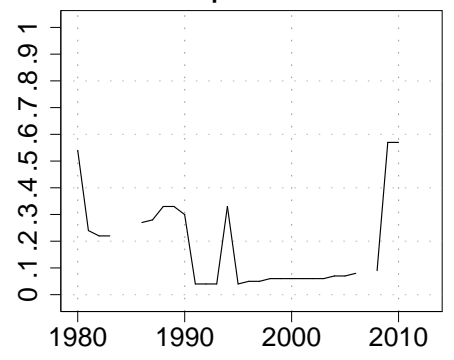

### Garbage Coding

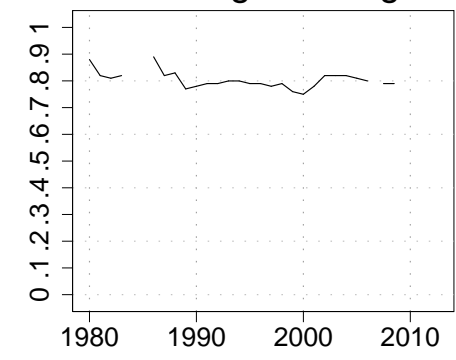

### Length of Cause List

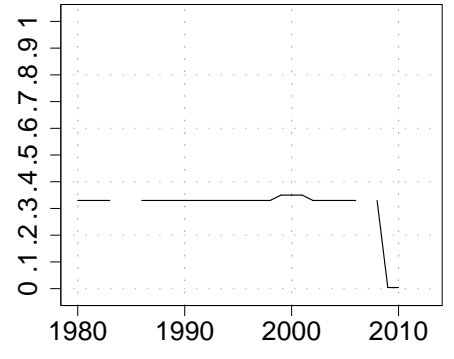

### Age/Sex Unspecified

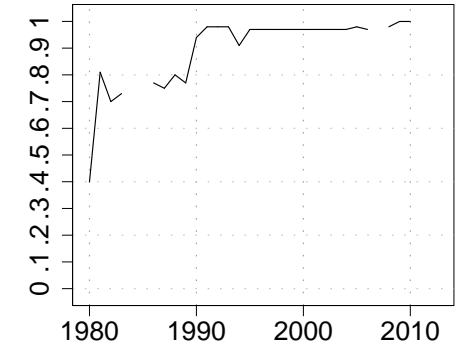

### Medically Impossible Diagnoses

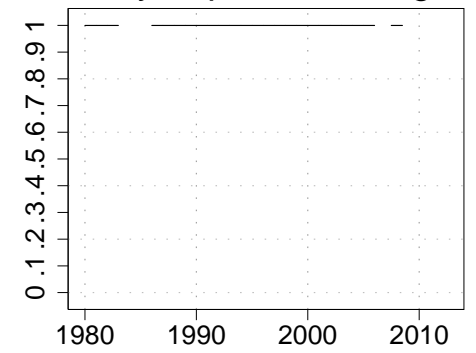

Indicators on their Original (Unweighted) Scale and Subtracted from One Where Necessary so Higher Scores are Preferable to Lower

# Iran

## VS Performance Index

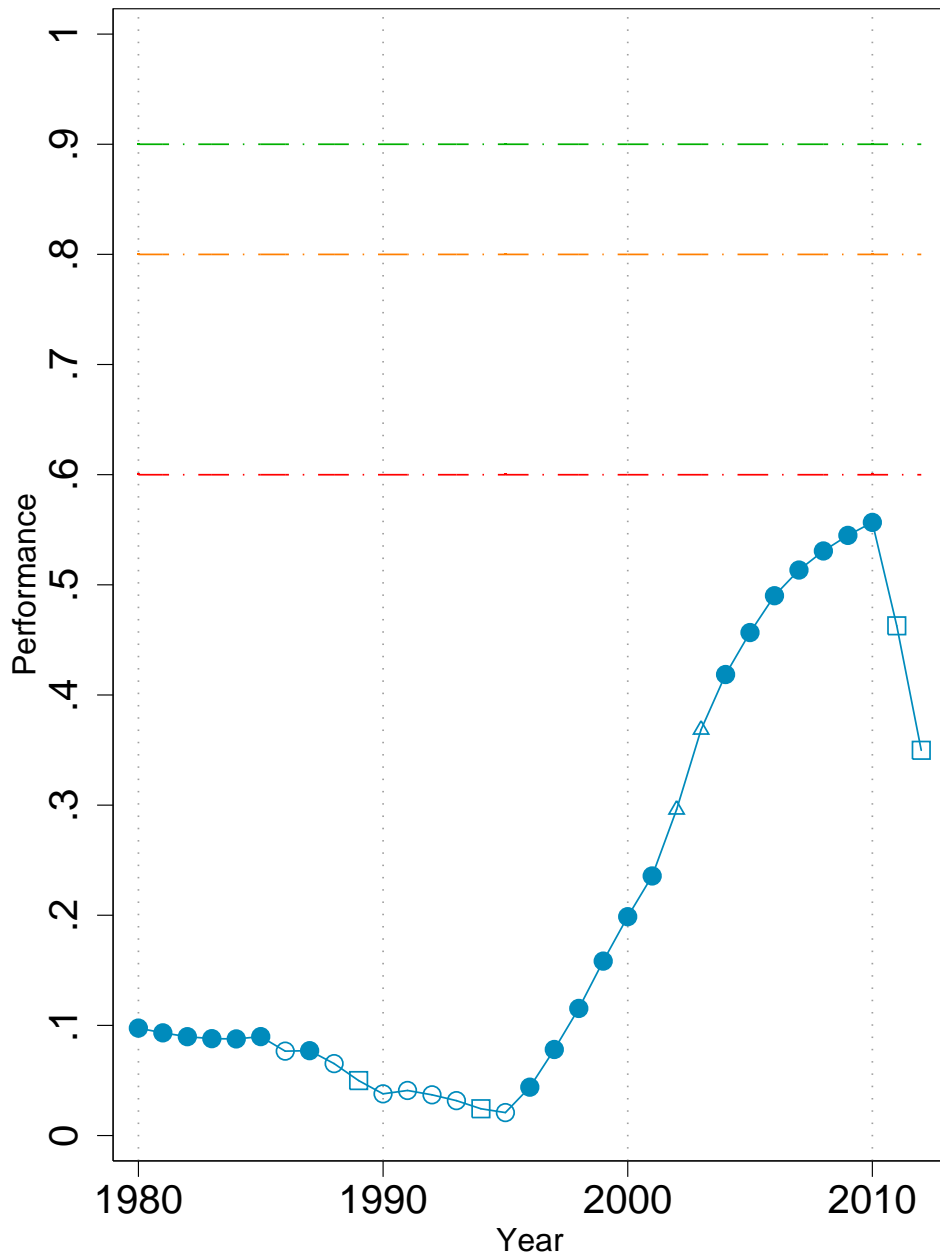

## Completeness

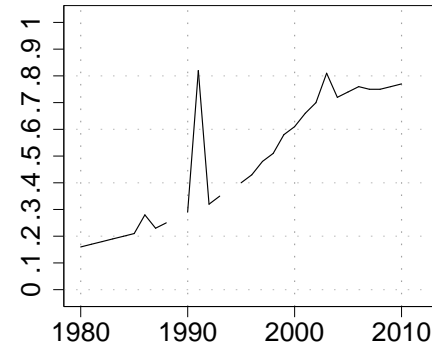

## Garbage Coding

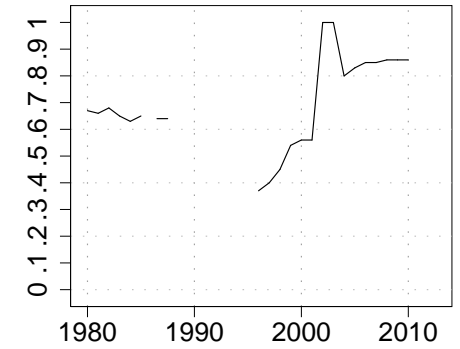

## Length of Cause List

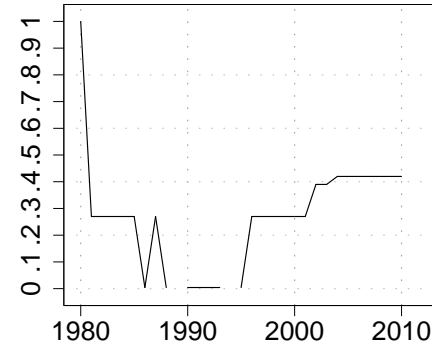

## Age/Sex Unspecified

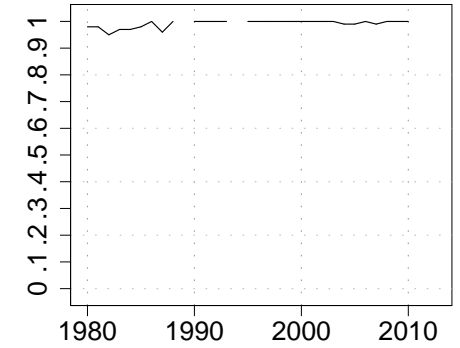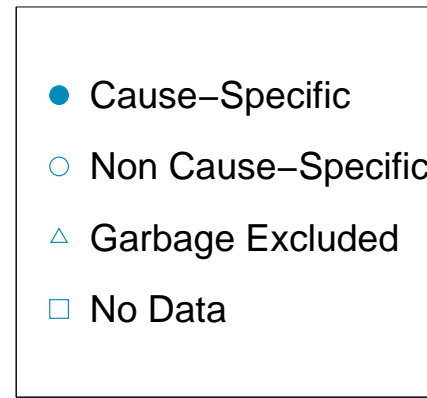

## Medically Impossible Diagnoses

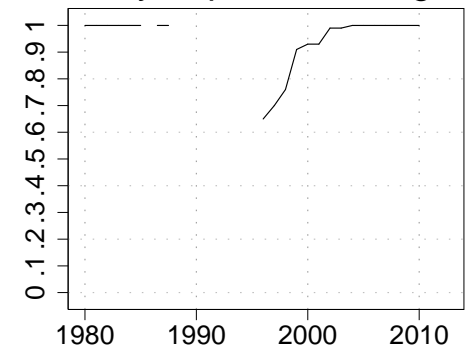

Indicators on their Original (Unweighted) Scale  
and Subtracted from One Where Necessary so Higher Scores are Preferable to Lower

# Iraq

## VS Performance Index

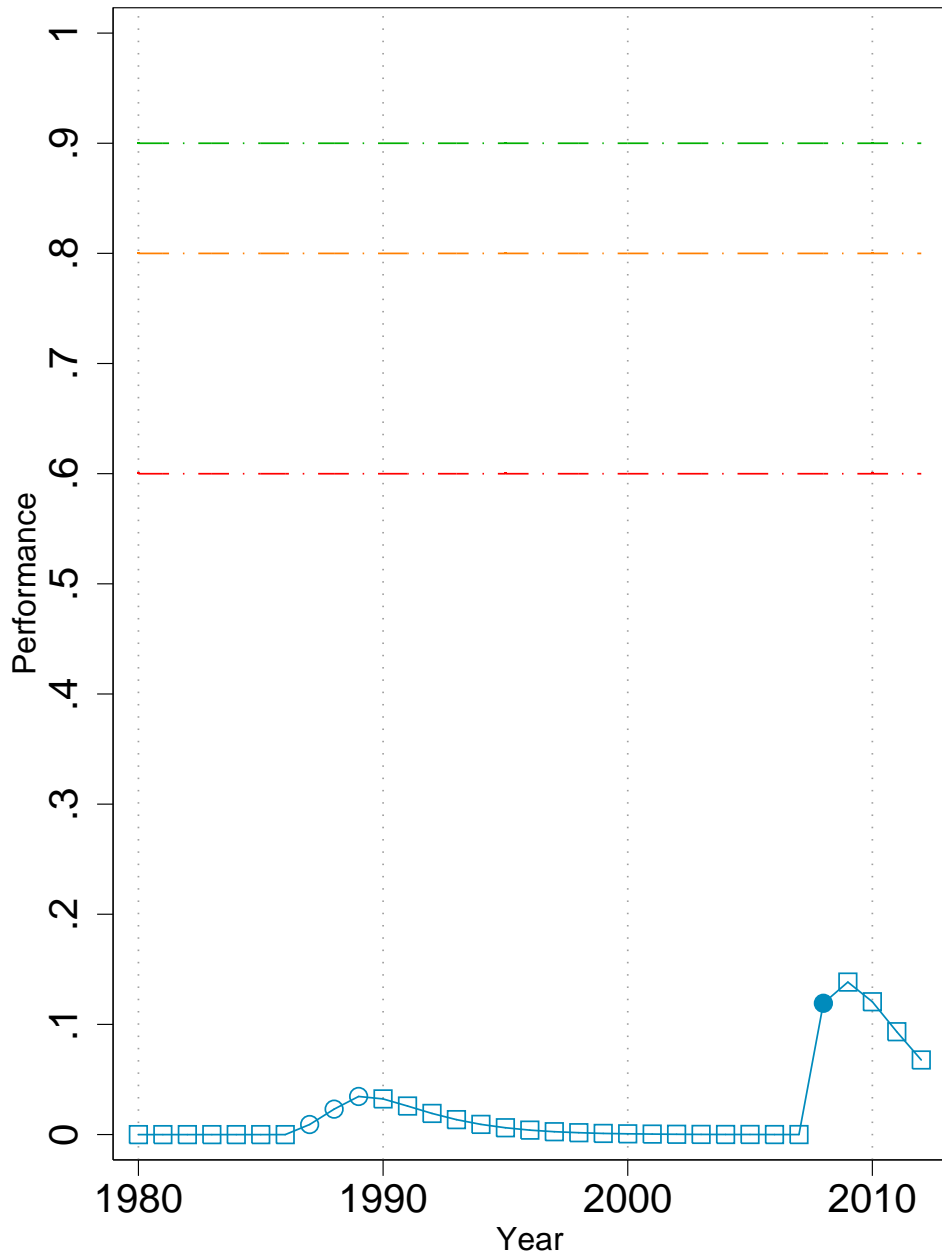

### Completeness

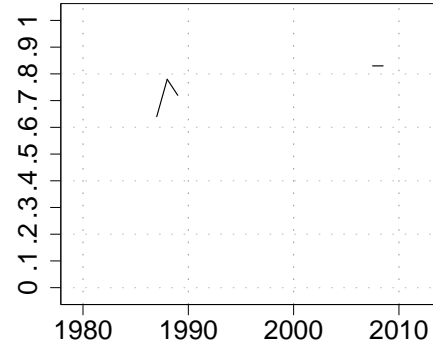

### Garbage Coding

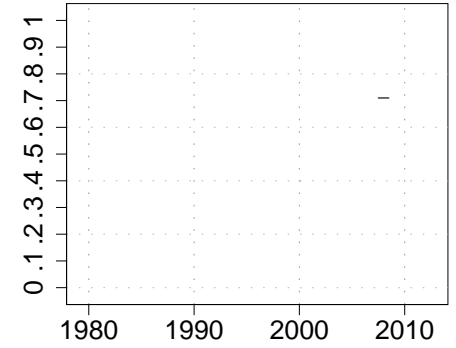

### Length of Cause List

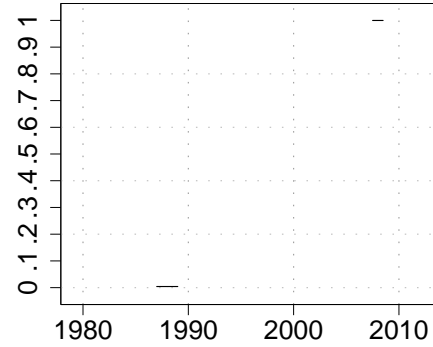

### Age/Sex Unspecified

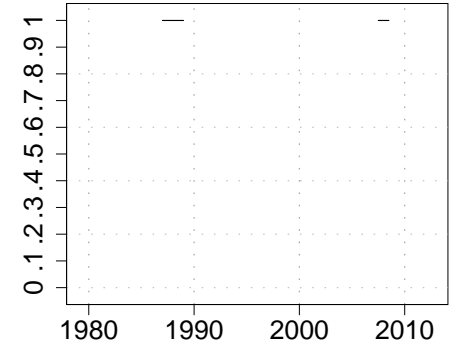

### Medically Impossible Diagnoses

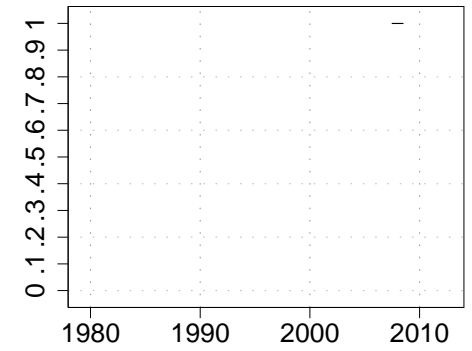

Indicators on their Original (Unweighted) Scale and Subtracted from One Where Necessary so Higher Scores are Preferable to Lower

# Ireland

## VS Performance Index

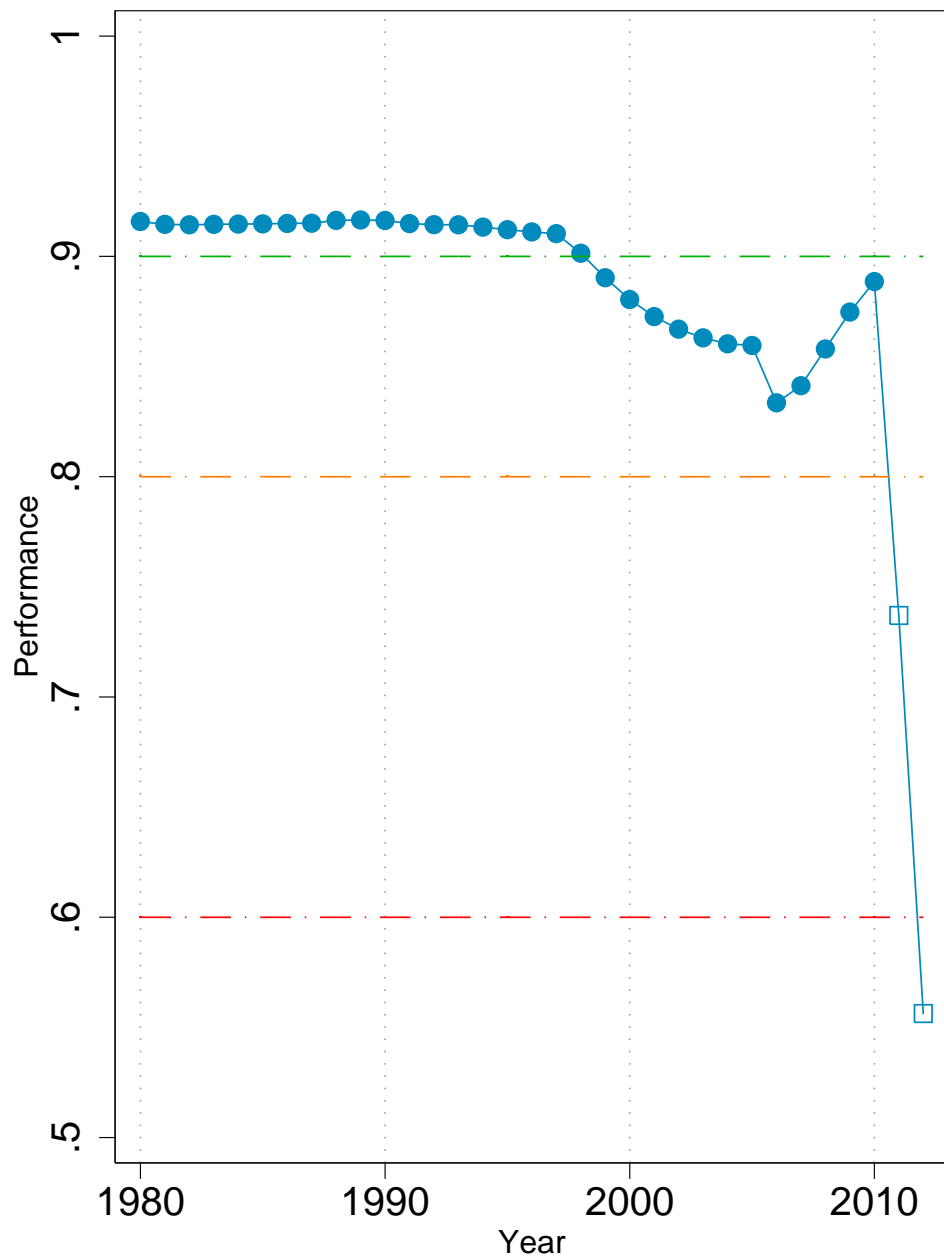

### Completeness

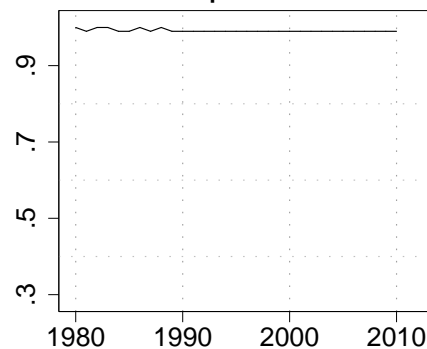

### Garbage Coding

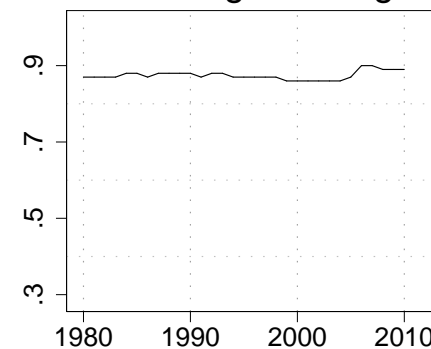

### Length of Cause List

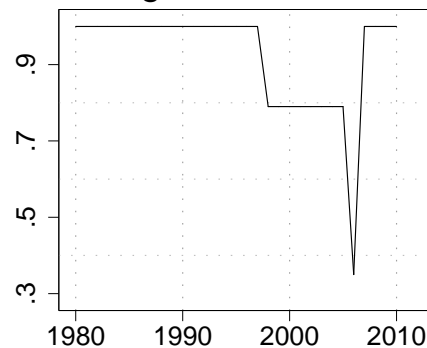

### Age/Sex Unspecified

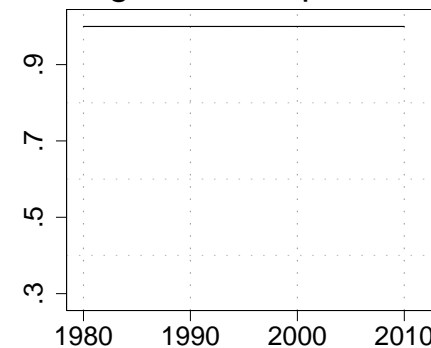

### Medically Impossible Diagnoses

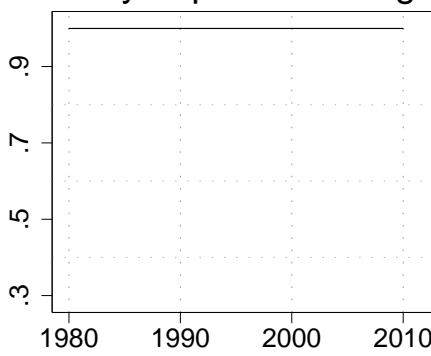

Indicators on their Original (Unweighted) Scale and Subtracted from One Where Necessary so Higher Scores are Preferable to Lower



# Israel

## VS Performance Index

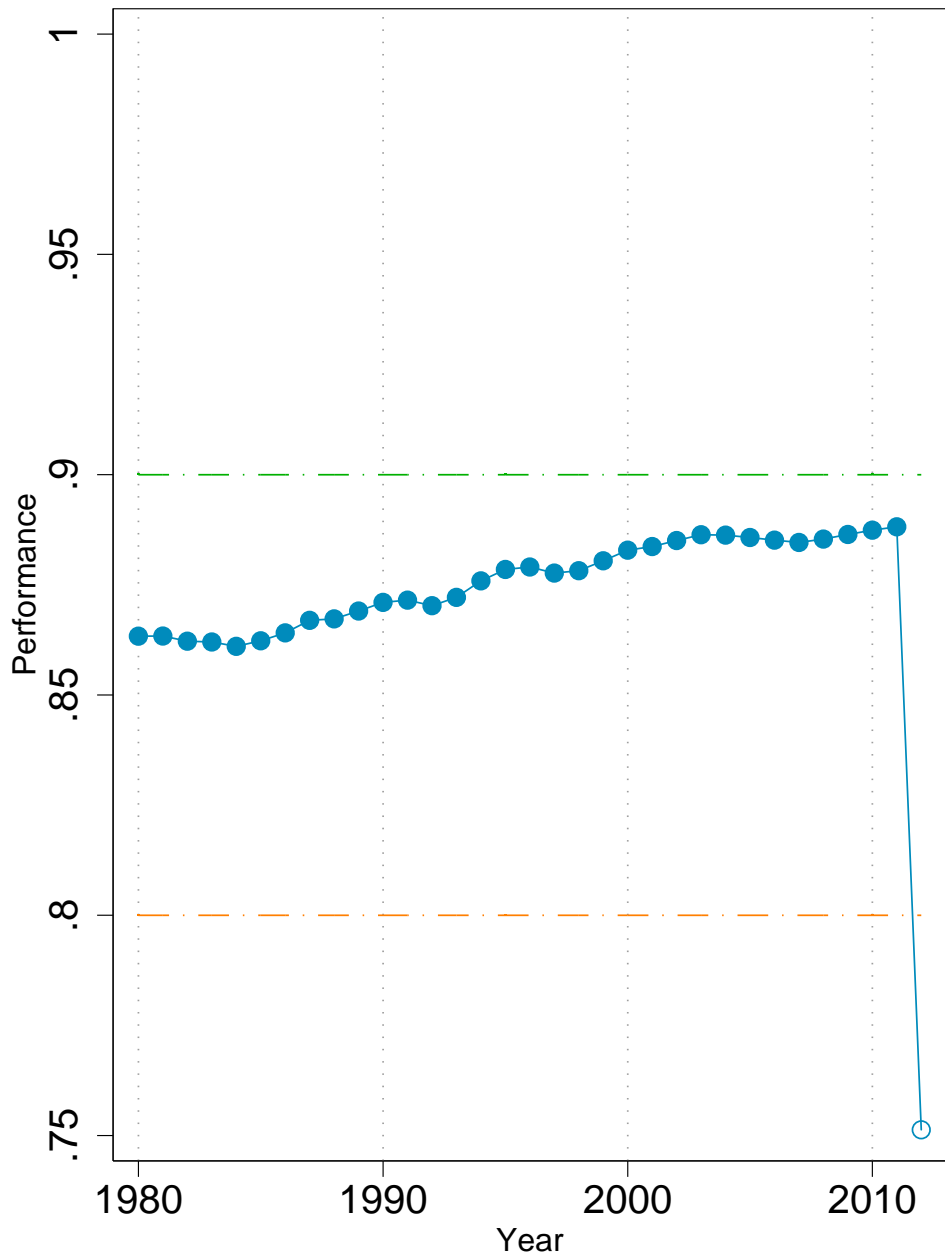

### Completeness

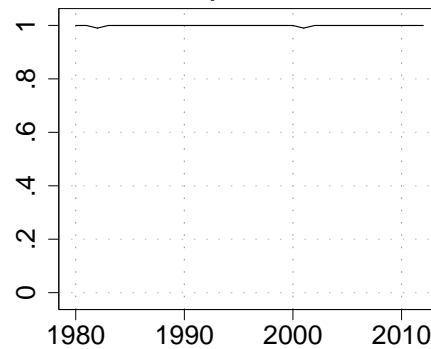

### Garbage Coding

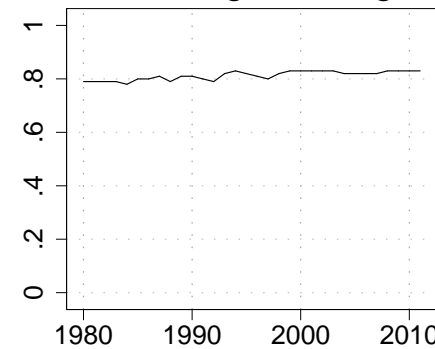

### Length of Cause List

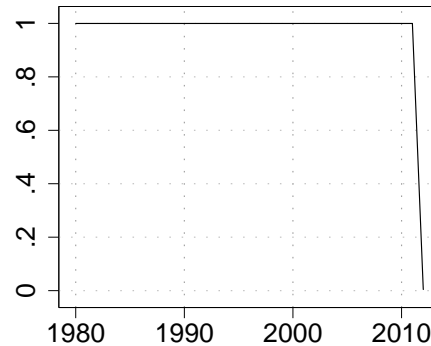

### Age/Sex Unspecified

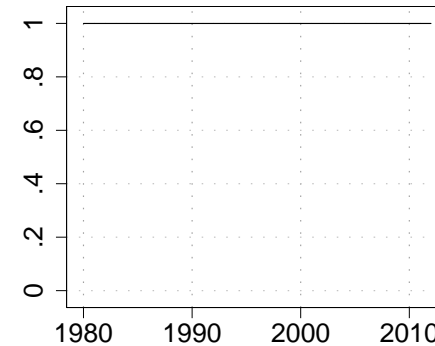

### Medically Impossible Diagnoses

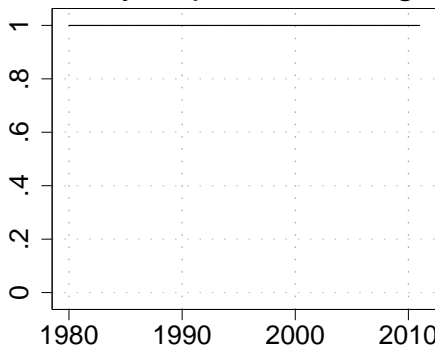

Indicators on their Original (Unweighted) Scale and Subtracted from One Where Necessary so Higher Scores are Preferable to Lower

# Italy

## VS Performance Index

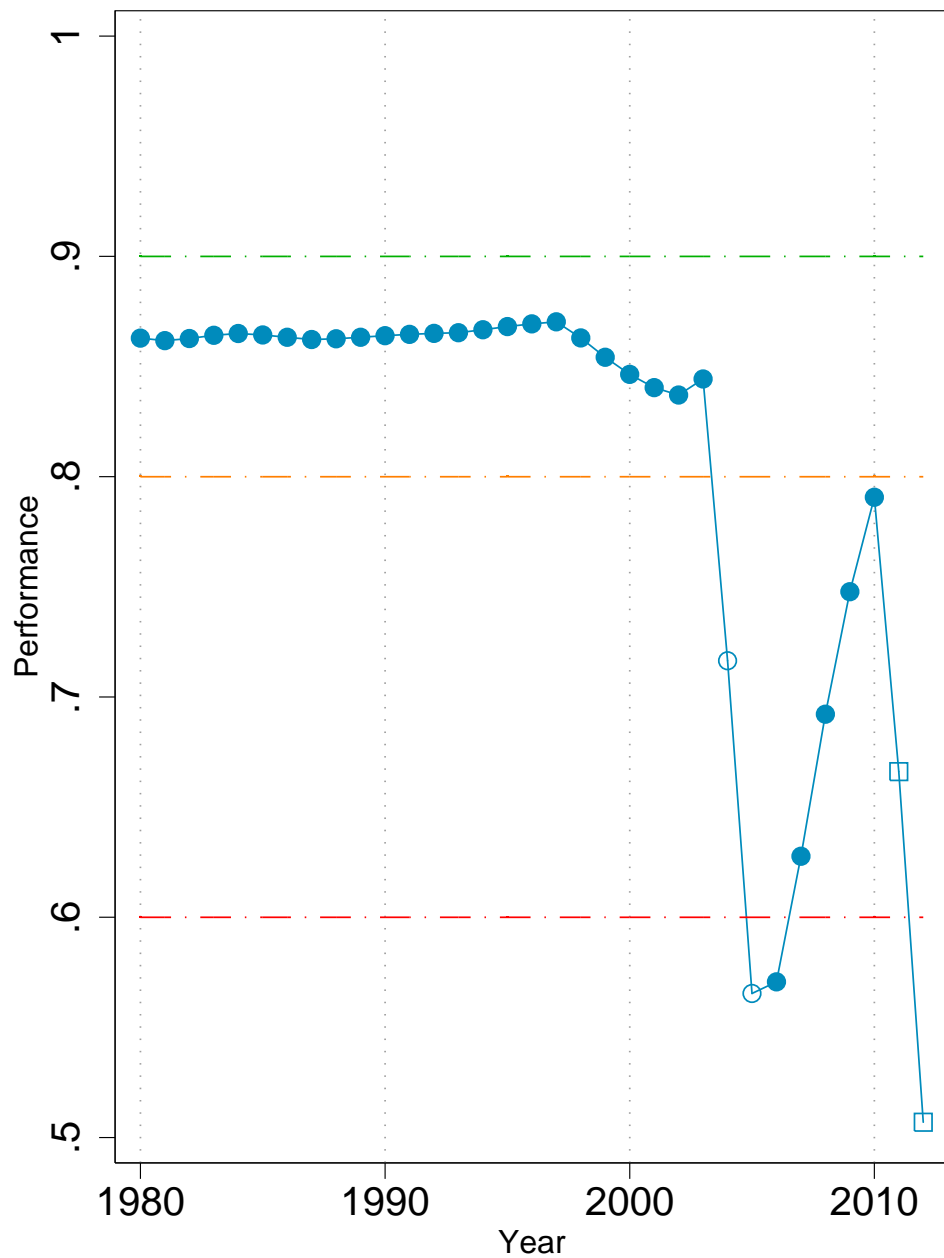

### Completeness

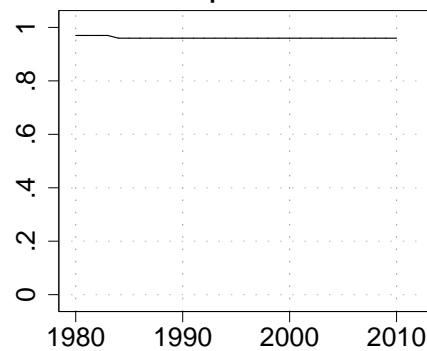

### Garbage Coding

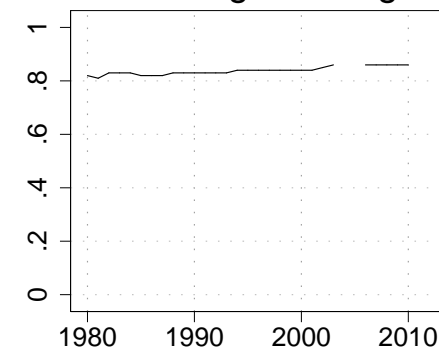

### Length of Cause List

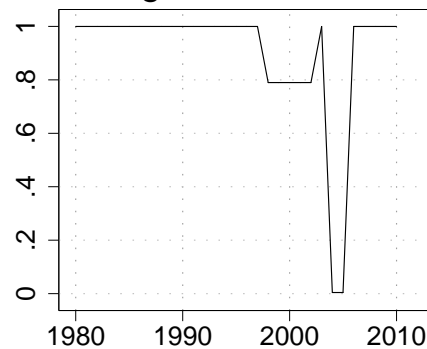

### Age/Sex Unspecified

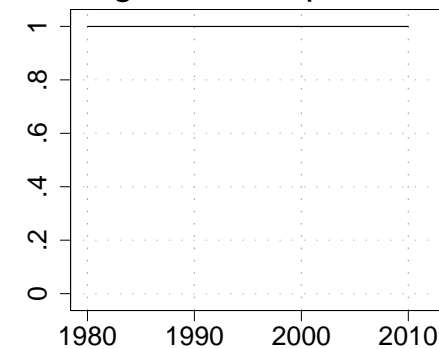

### Medically Impossible Diagnoses

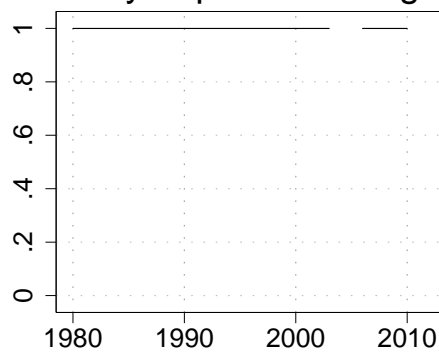

Indicators on their Original (Unweighted) Scale and Subtracted from One Where Necessary so Higher Scores are Preferable to Lower

# Jamaica

## VS Performance Index

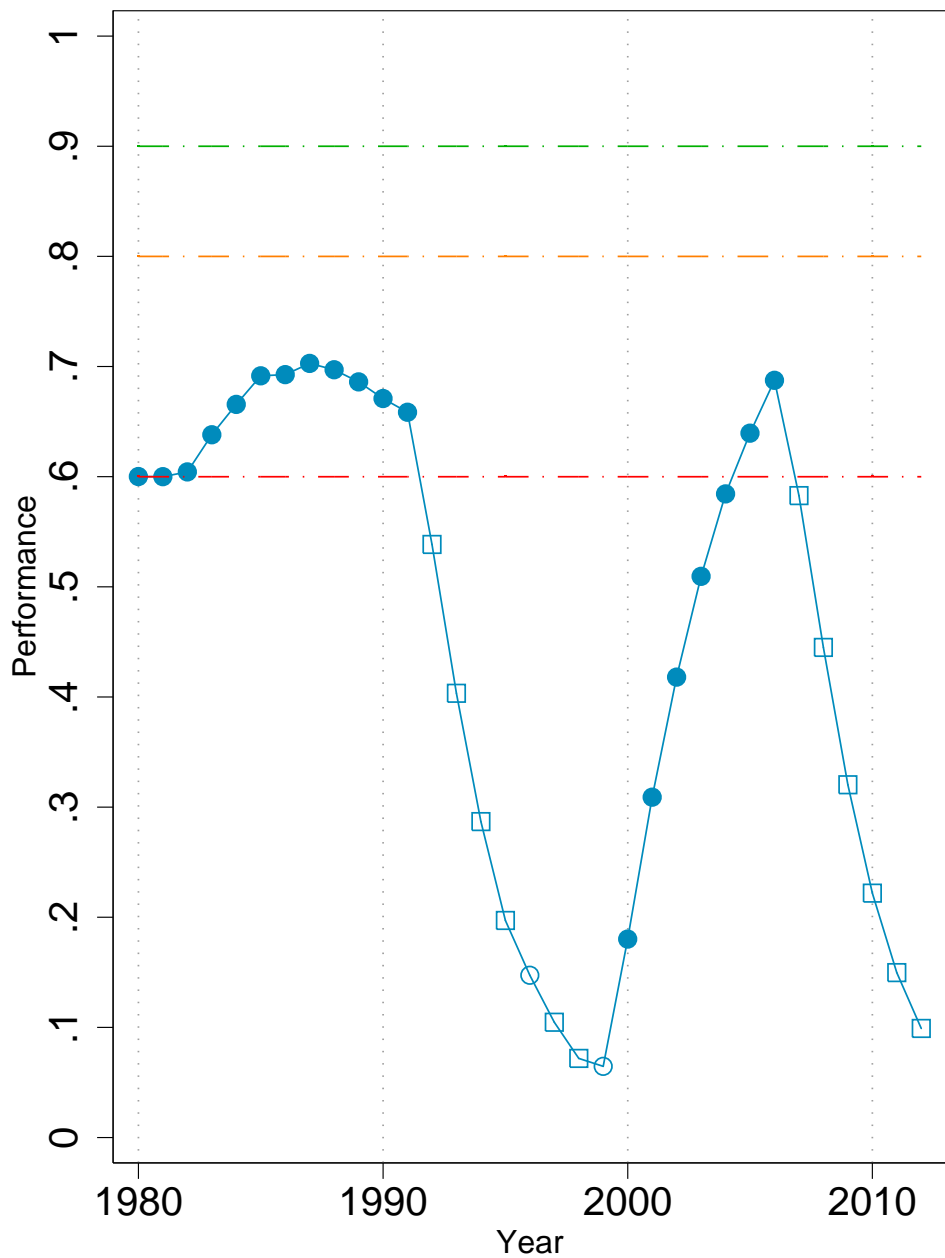

### Completeness

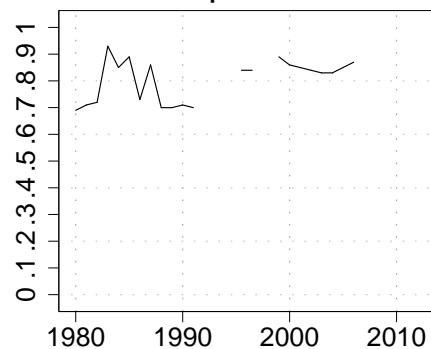

### Garbage Coding

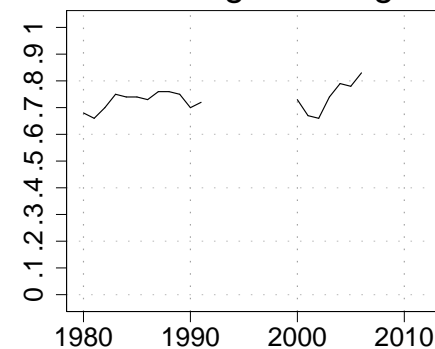

### Length of Cause List

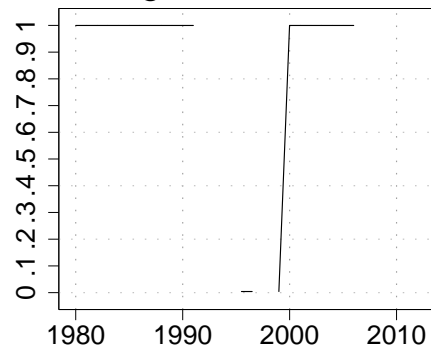

### Age/Sex Unspecified

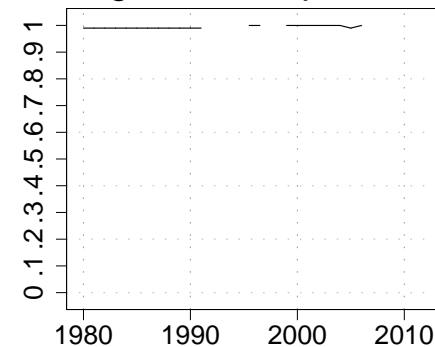

### Medically Impossible Diagnoses

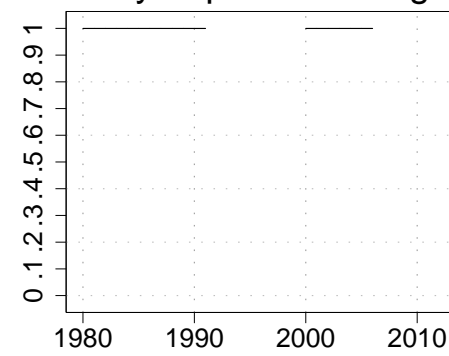

Indicators on their Original (Unweighted) Scale and Subtracted from One Where Necessary so Higher Scores are Preferable to Lower

# Japan

## VS Performance Index

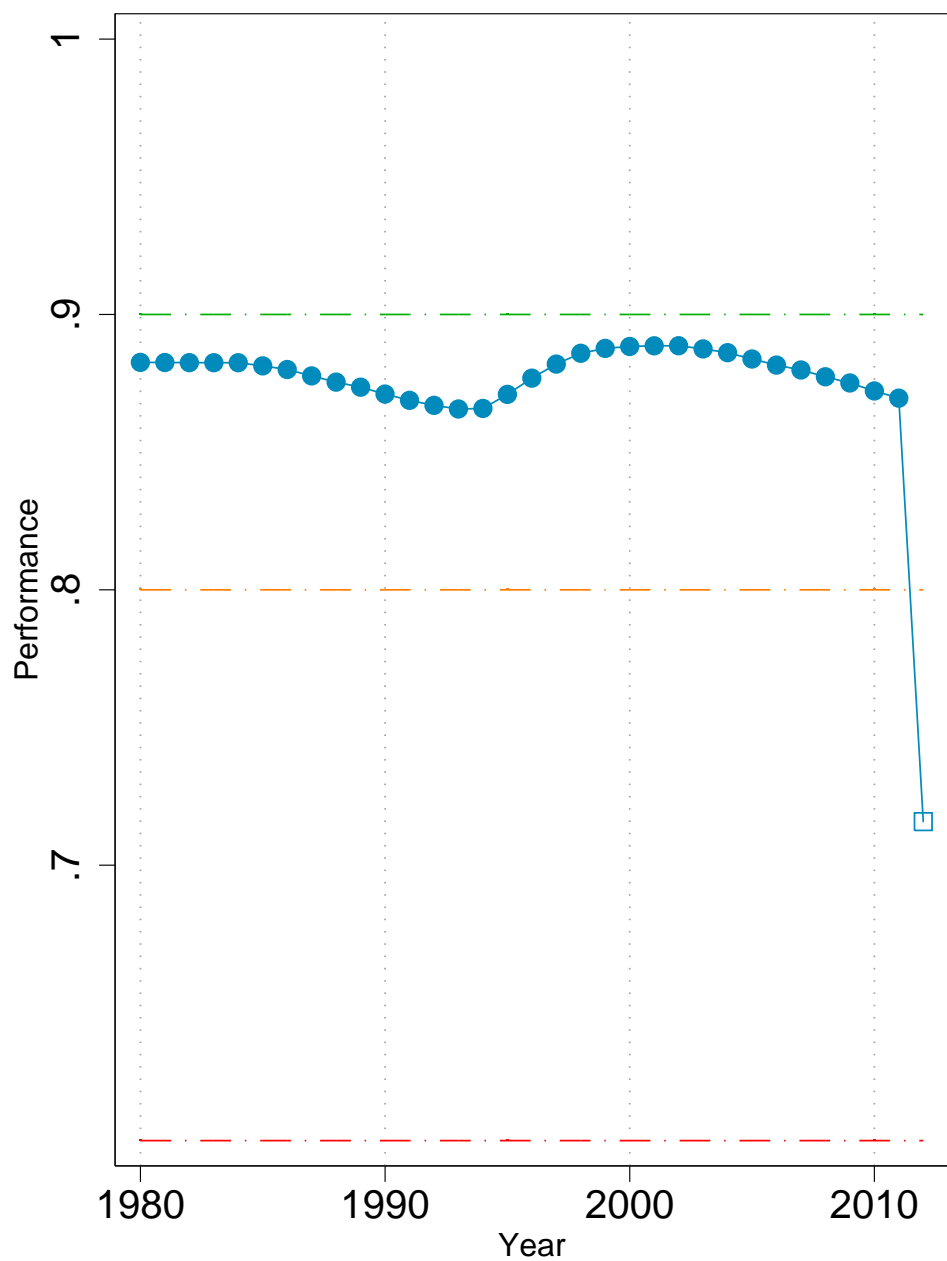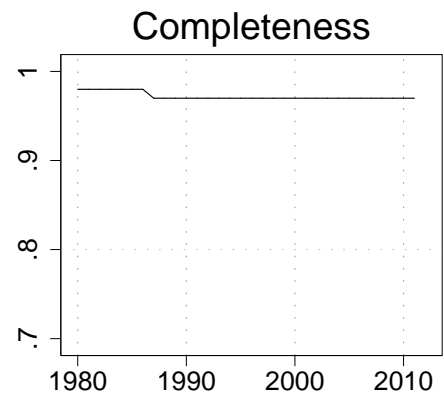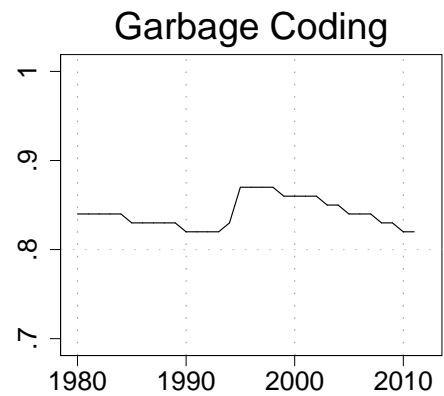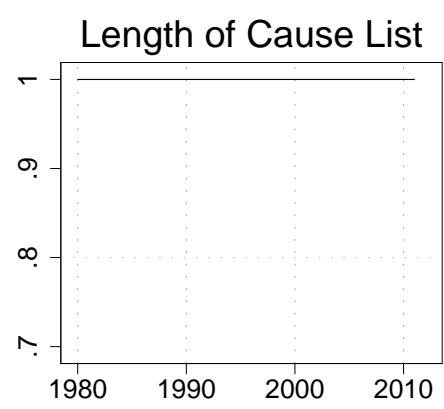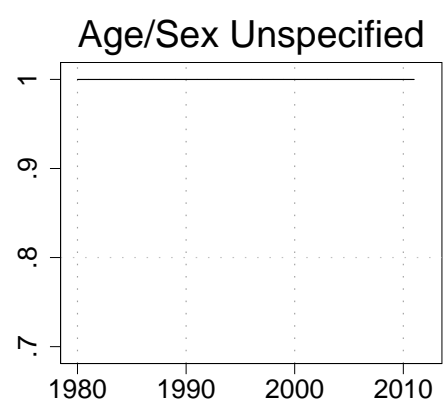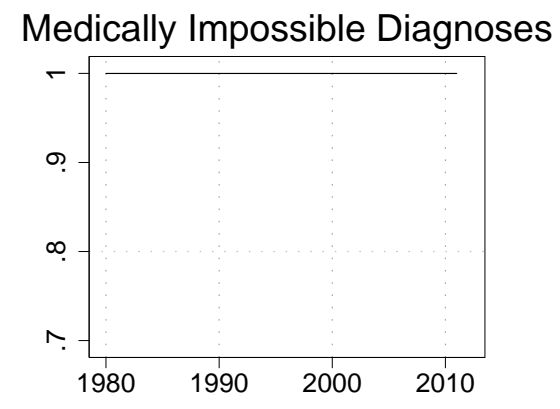

Indicators on their Original (Unweighted) Scale and Subtracted from One Where Necessary so Higher Scores are Preferable to Lower

# Jordan VS Performance Index

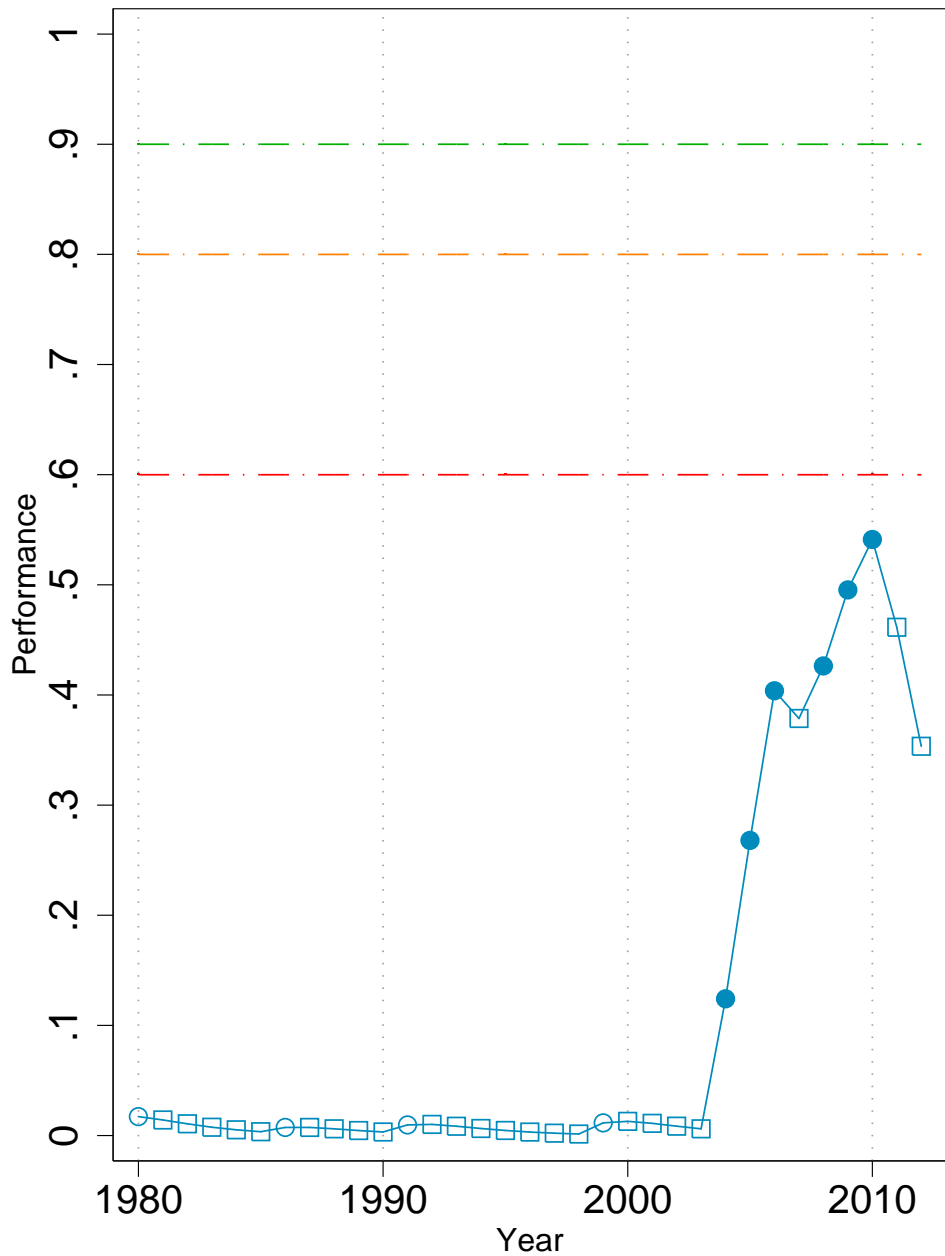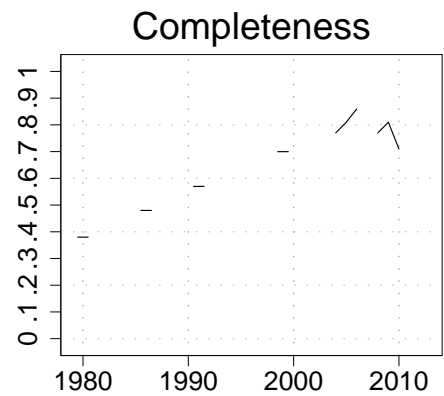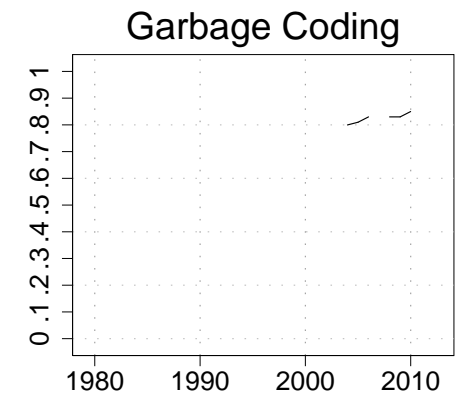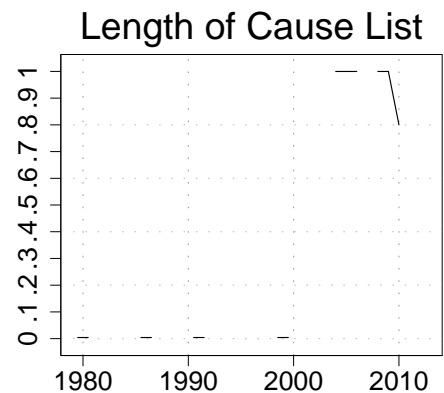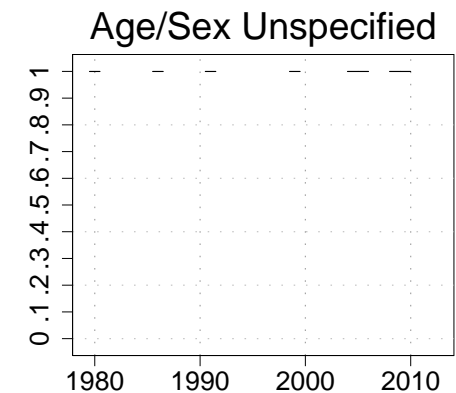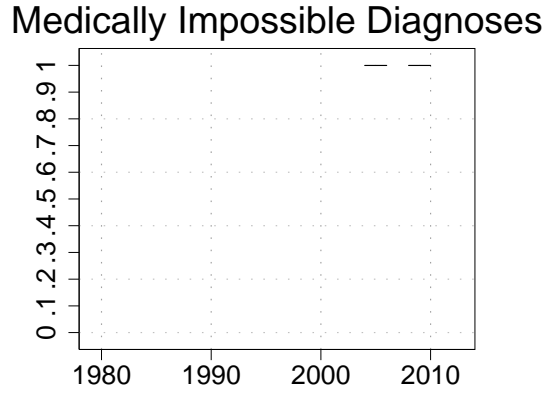

Indicators on their Original (Unweighted) Scale and Subtracted from One Where Necessary so Higher Scores are Preferable to Lower

# Kazakhstan

## VS Performance Index

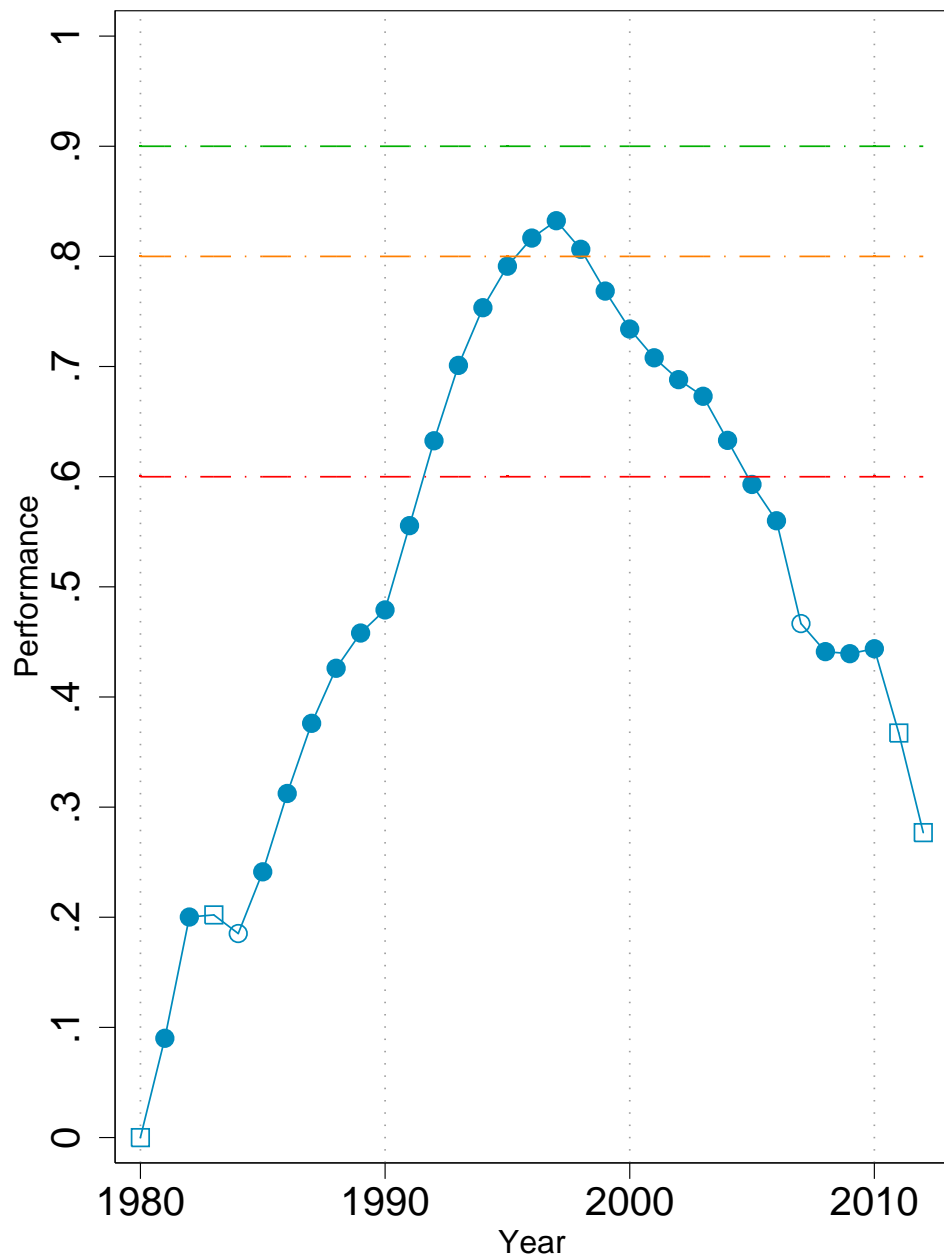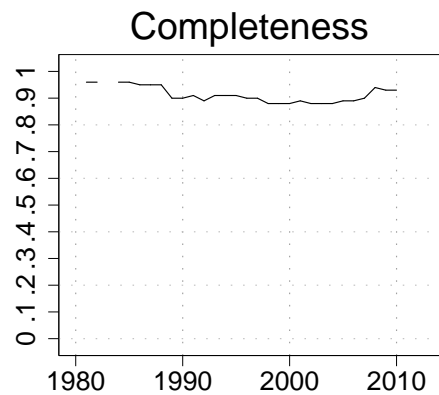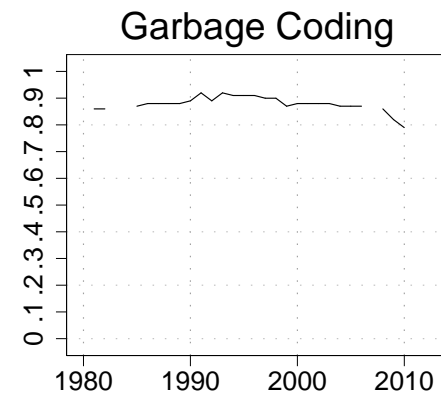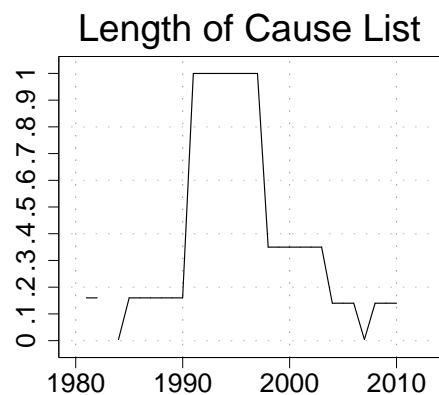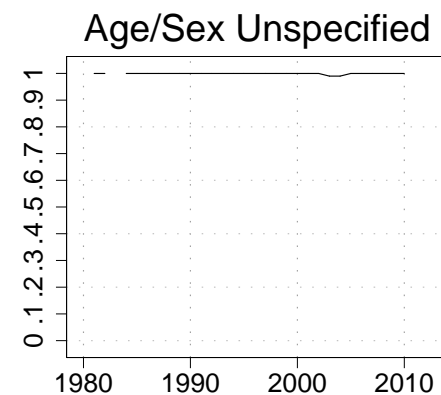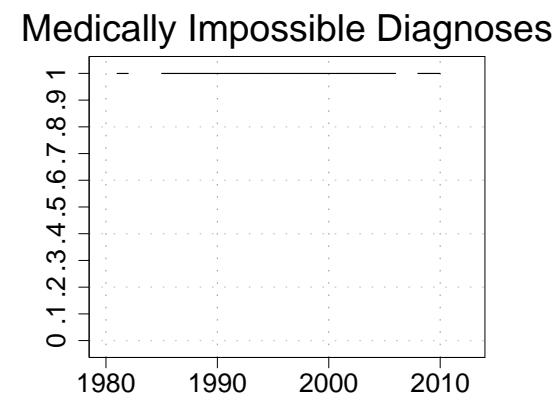

Indicators on their Original (Unweighted) Scale and Subtracted from One Where Necessary so Higher Scores are Preferable to Lower

# Kenya

## VS Performance Index

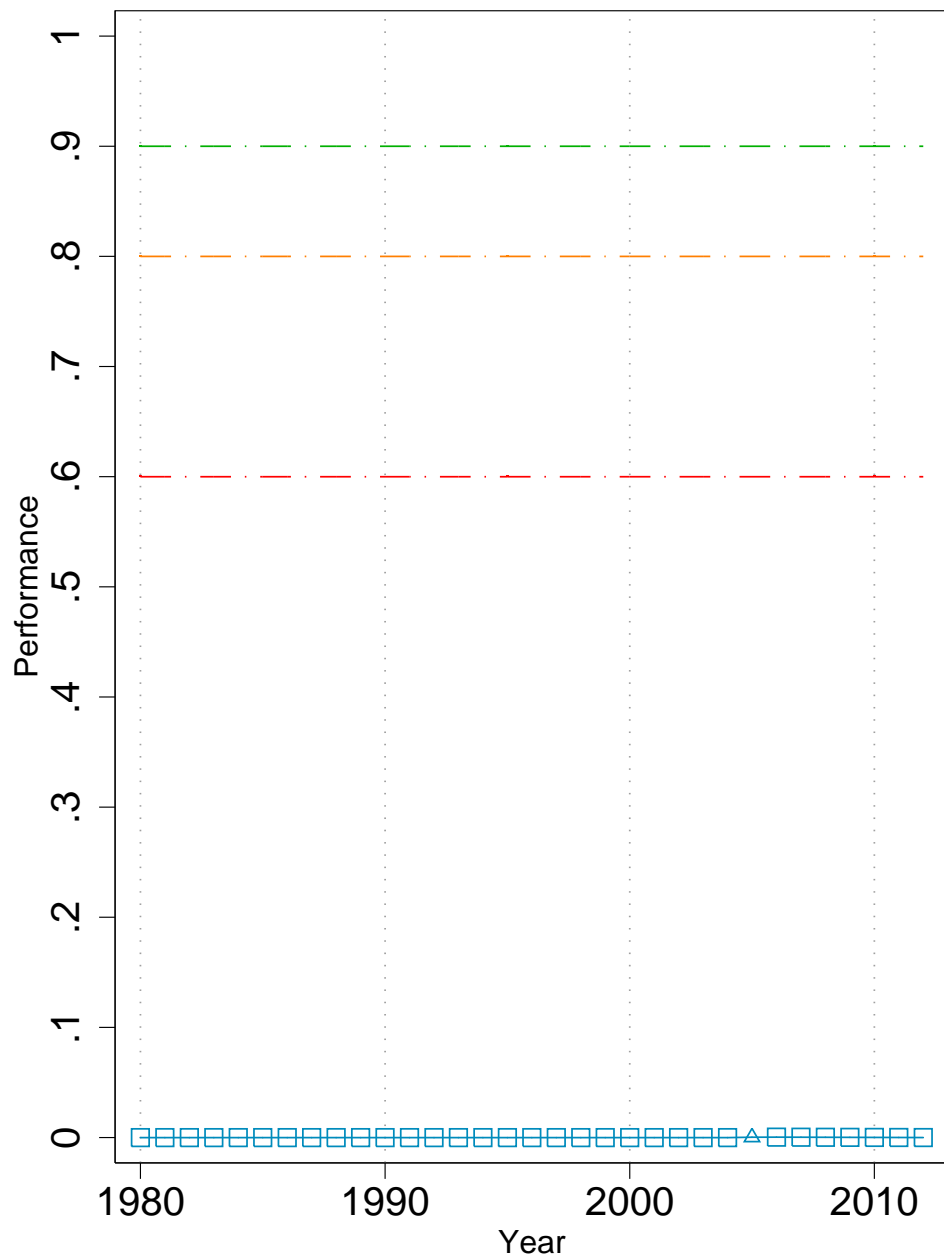

### Completeness

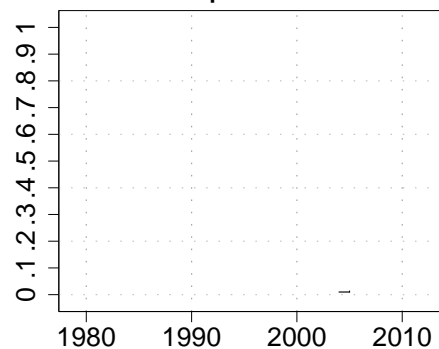

### Garbage Coding

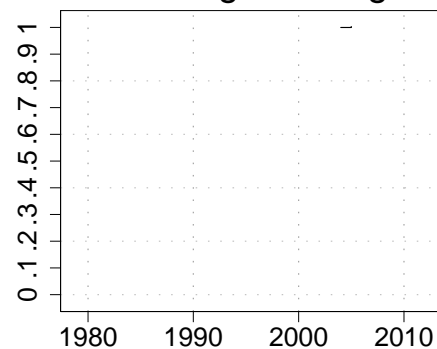

### Length of Cause List

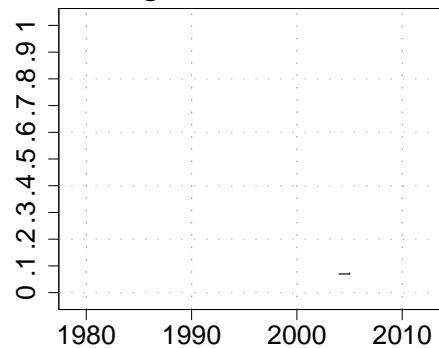

### Age/Sex Unspecified

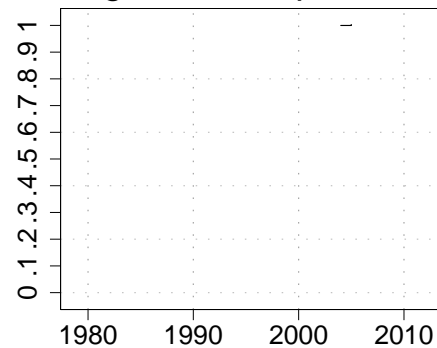

### Medically Impossible Diagnoses

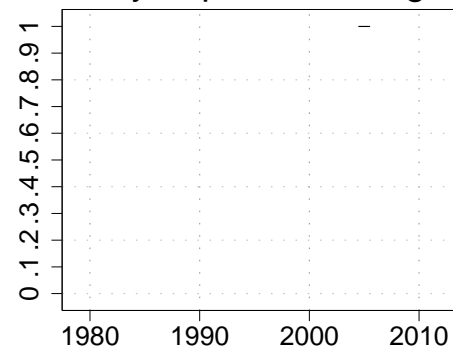

Indicators on their Original (Unweighted) Scale and Subtracted from One Where Necessary so Higher Scores are Preferable to Lower

# Kiribati

## VS Performance Index

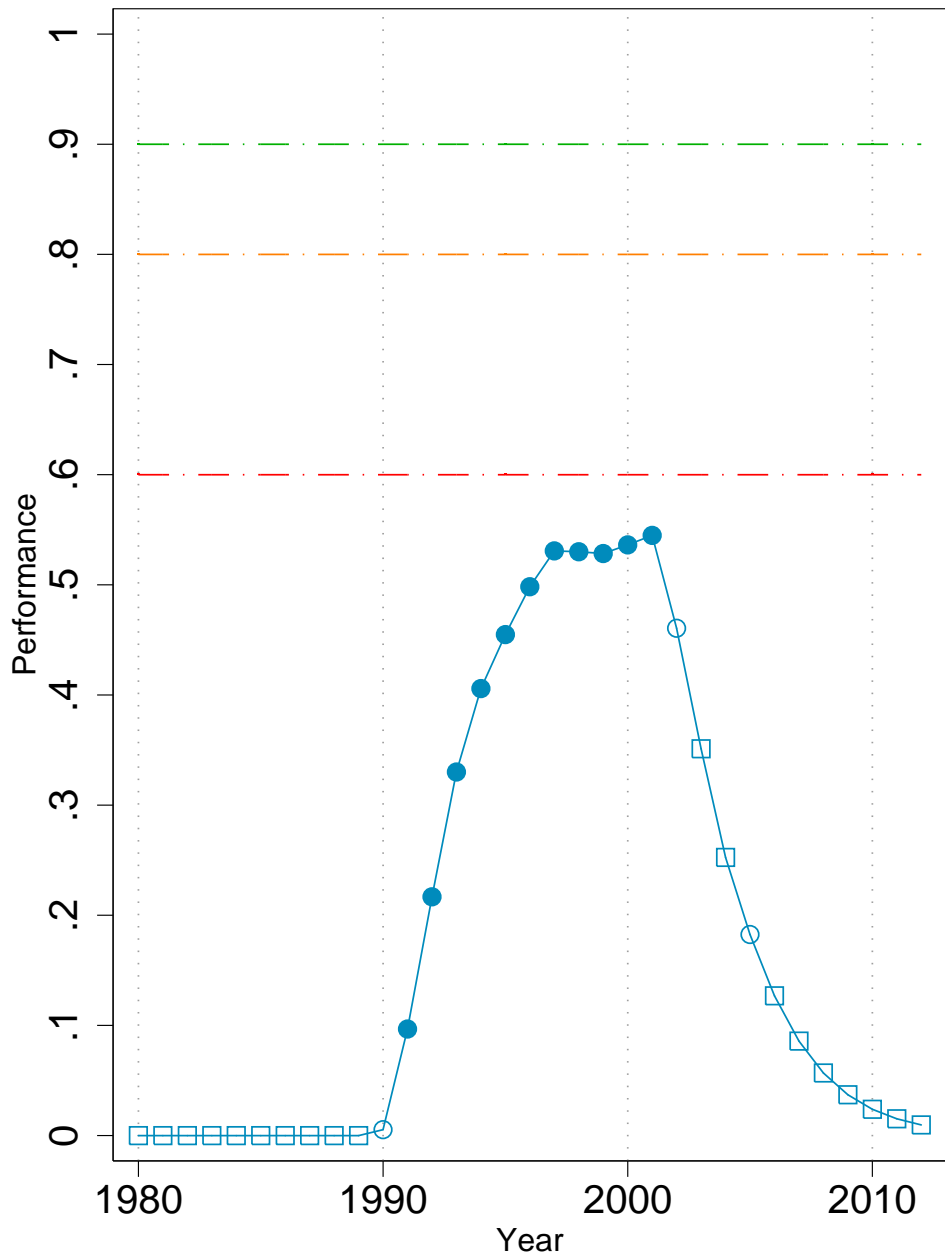

### Completeness

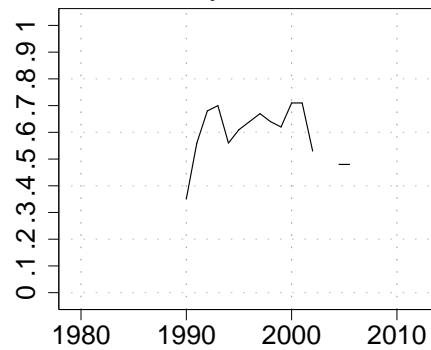

### Garbage Coding

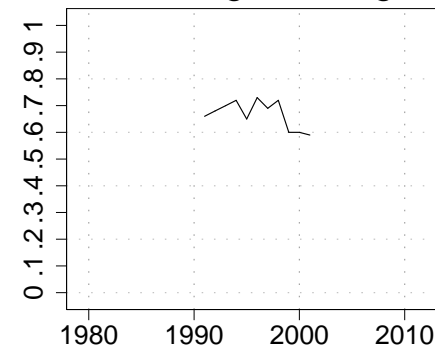

### Length of Cause List

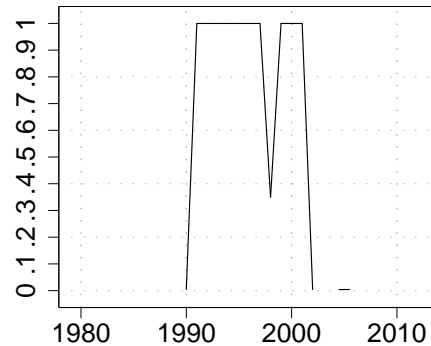

### Age/Sex Unspecified

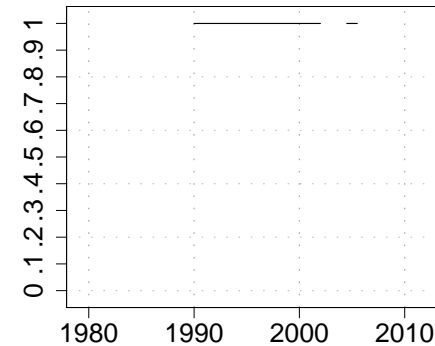

### Medically Impossible Diagnoses

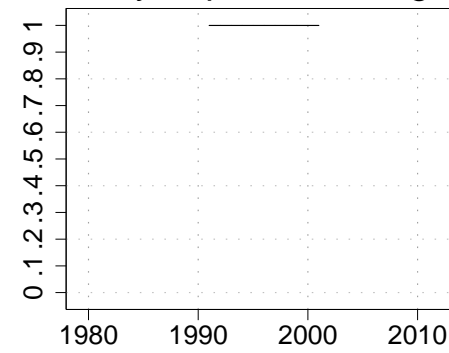

Indicators on their Original (Unweighted) Scale and Subtracted from One Where Necessary so Higher Scores are Preferable to Lower



# Kuwait

## VS Performance Index

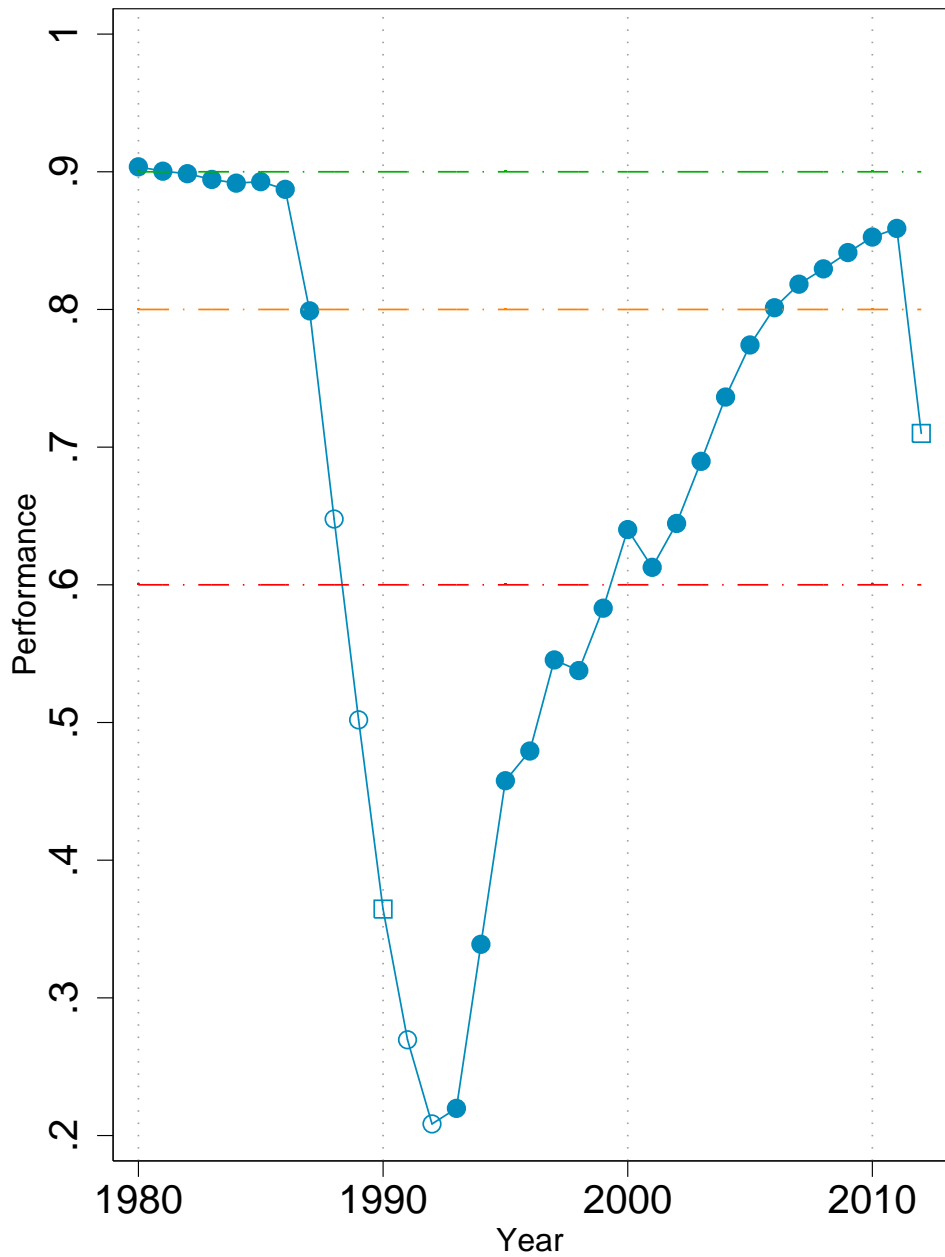

### Completeness

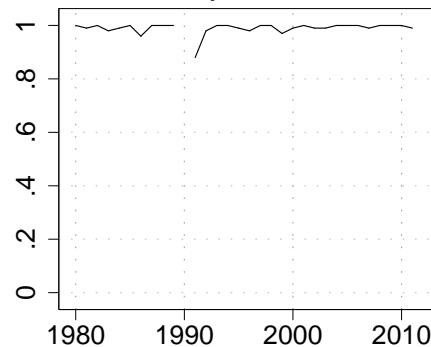

### Garbage Coding

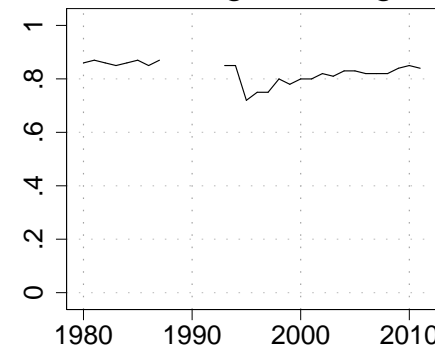

### Length of Cause List

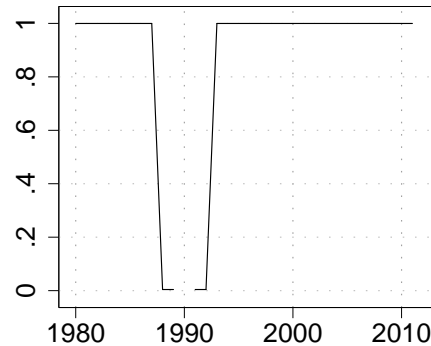

### Age/Sex Unspecified

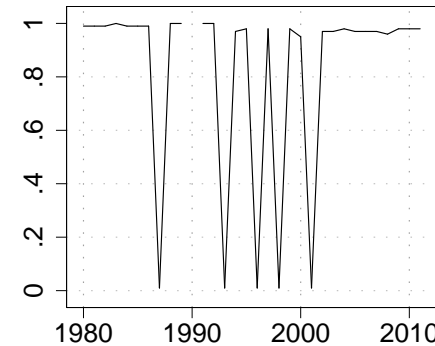

### Medically Impossible Diagnoses

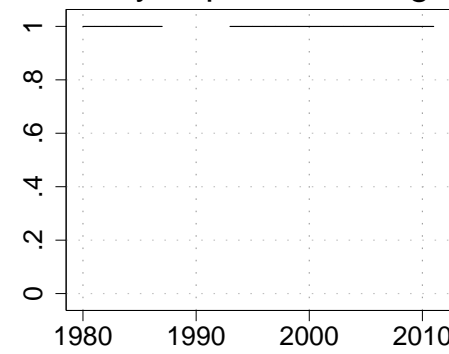

Indicators on their Original (Unweighted) Scale and Subtracted from One Where Necessary so Higher Scores are Preferable to Lower

# Kyrgyzstan

## VS Performance Index

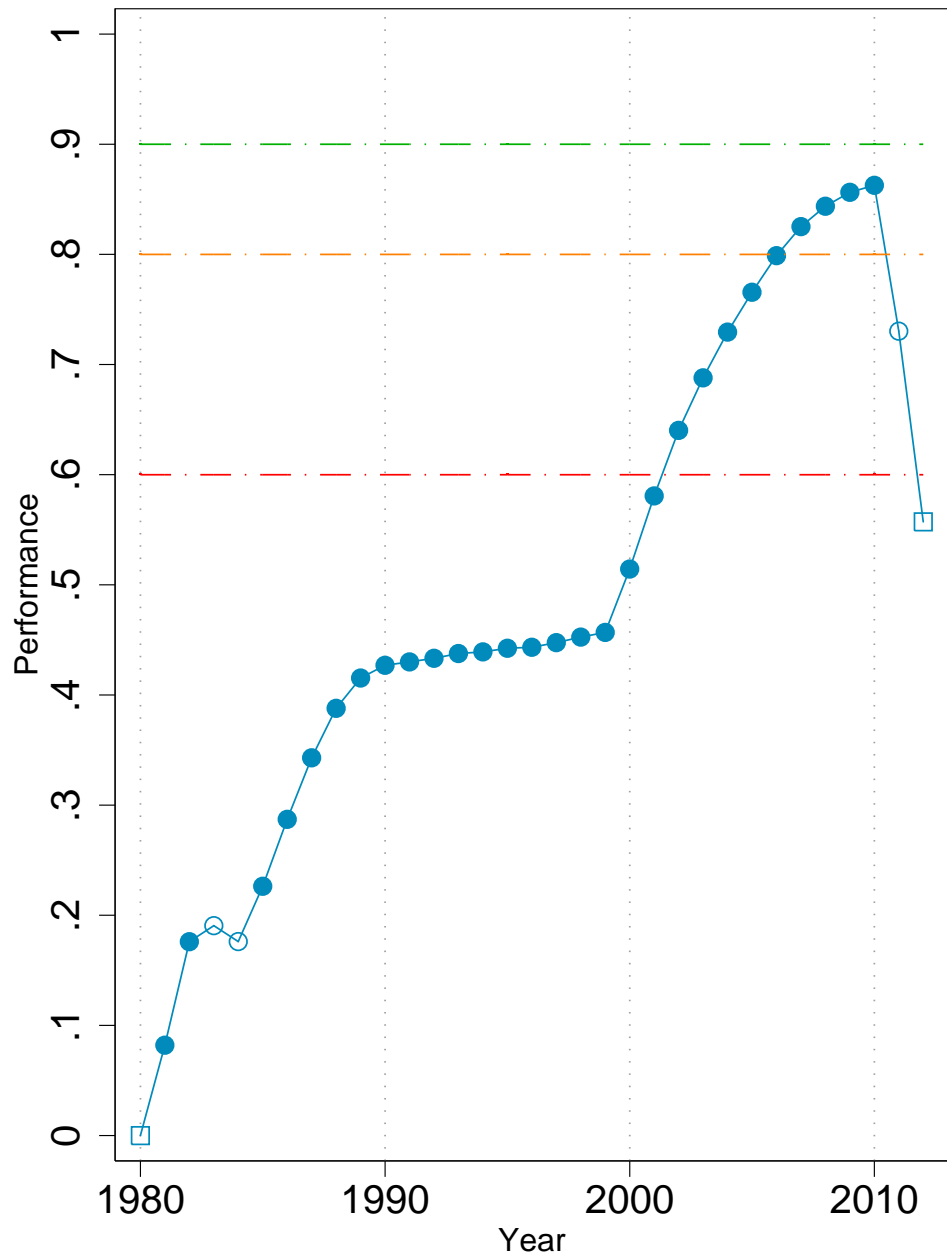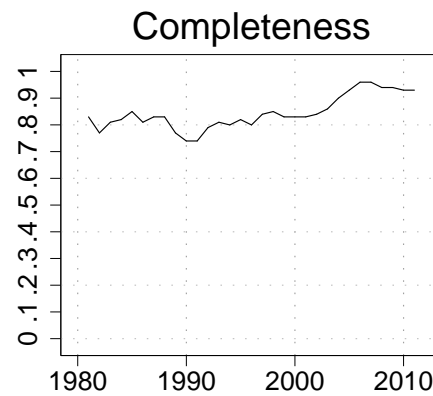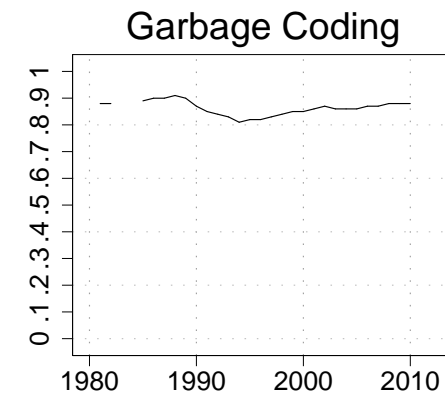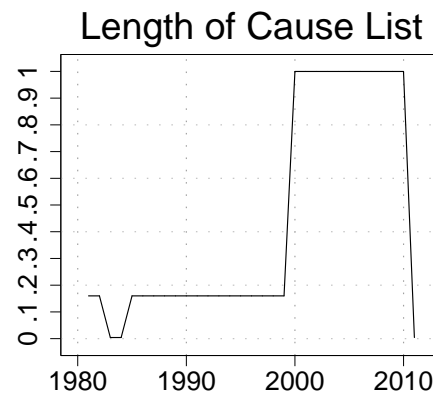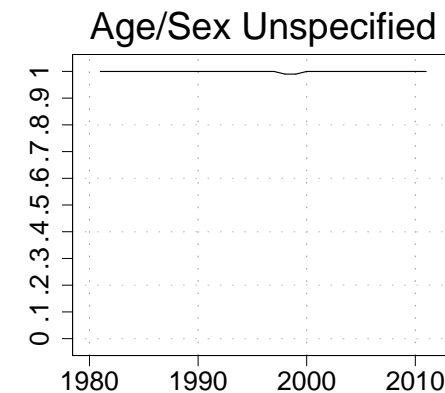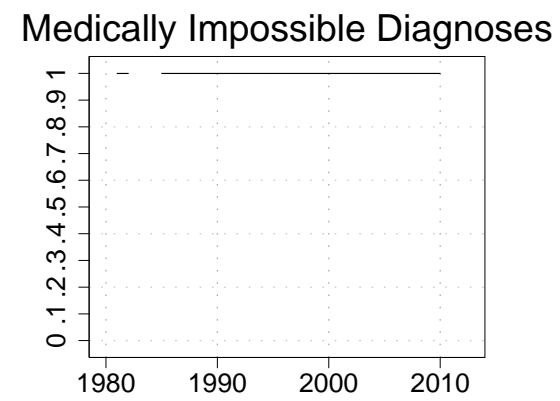

Indicators on their Original (Unweighted) Scale and Subtracted from One Where Necessary so Higher Scores are Preferable to Lower

# Latvia

## VS Performance Index

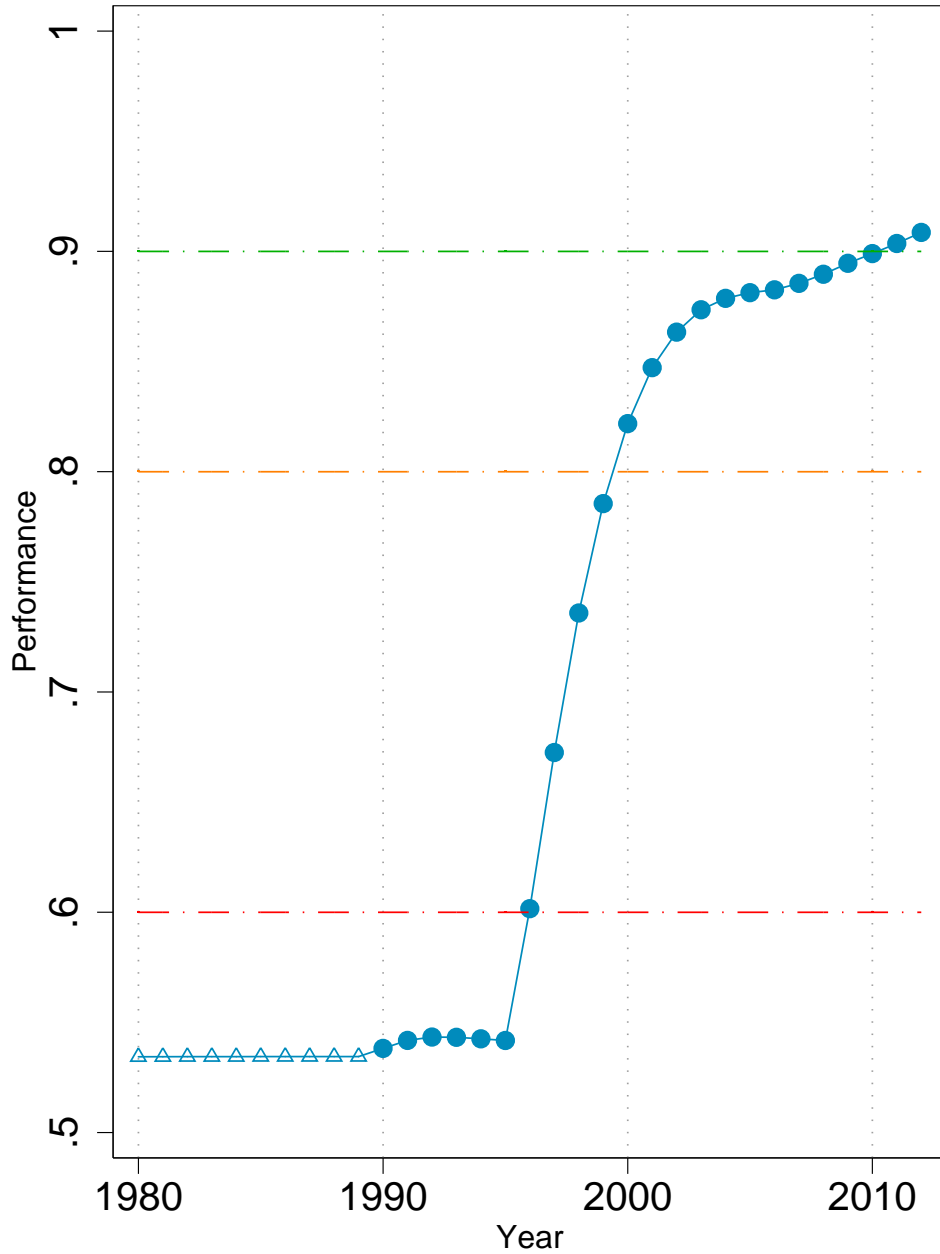

### Completeness

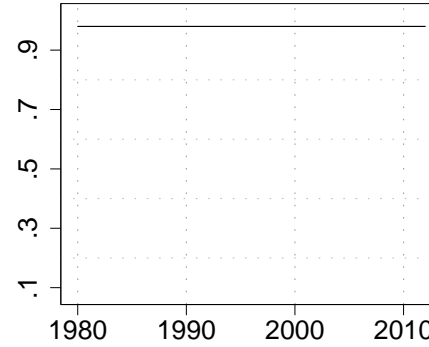

### Garbage Coding

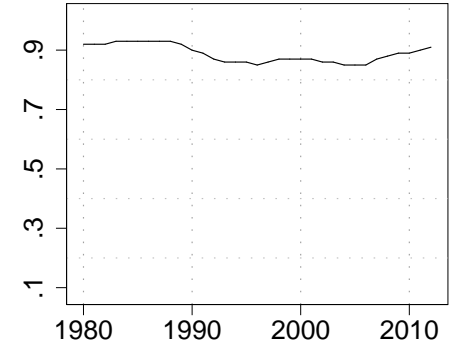

### Length of Cause List

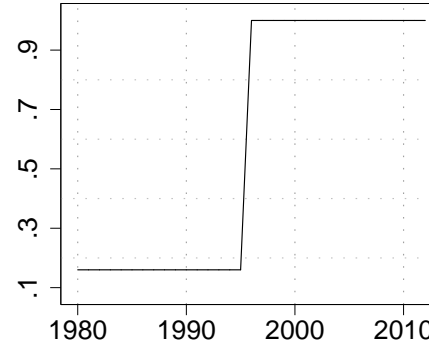

### Age/Sex Unspecified

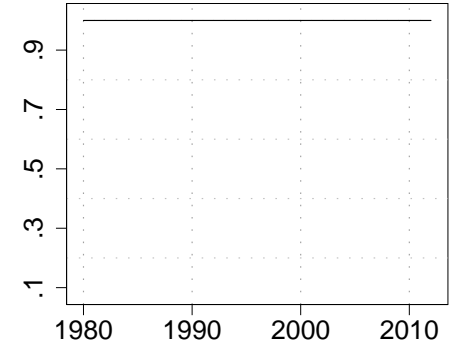

### Medically Impossible Diagnoses

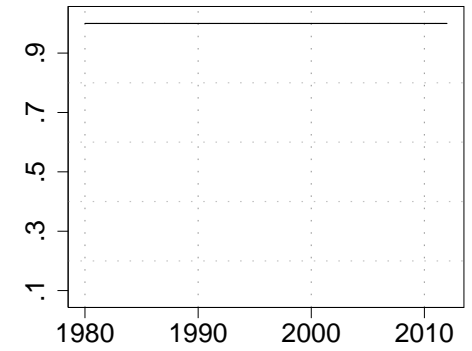

Indicators on their Original (Unweighted) Scale and Subtracted from One Where Necessary so Higher Scores are Preferable to Lower

# Libya

## VS Performance Index

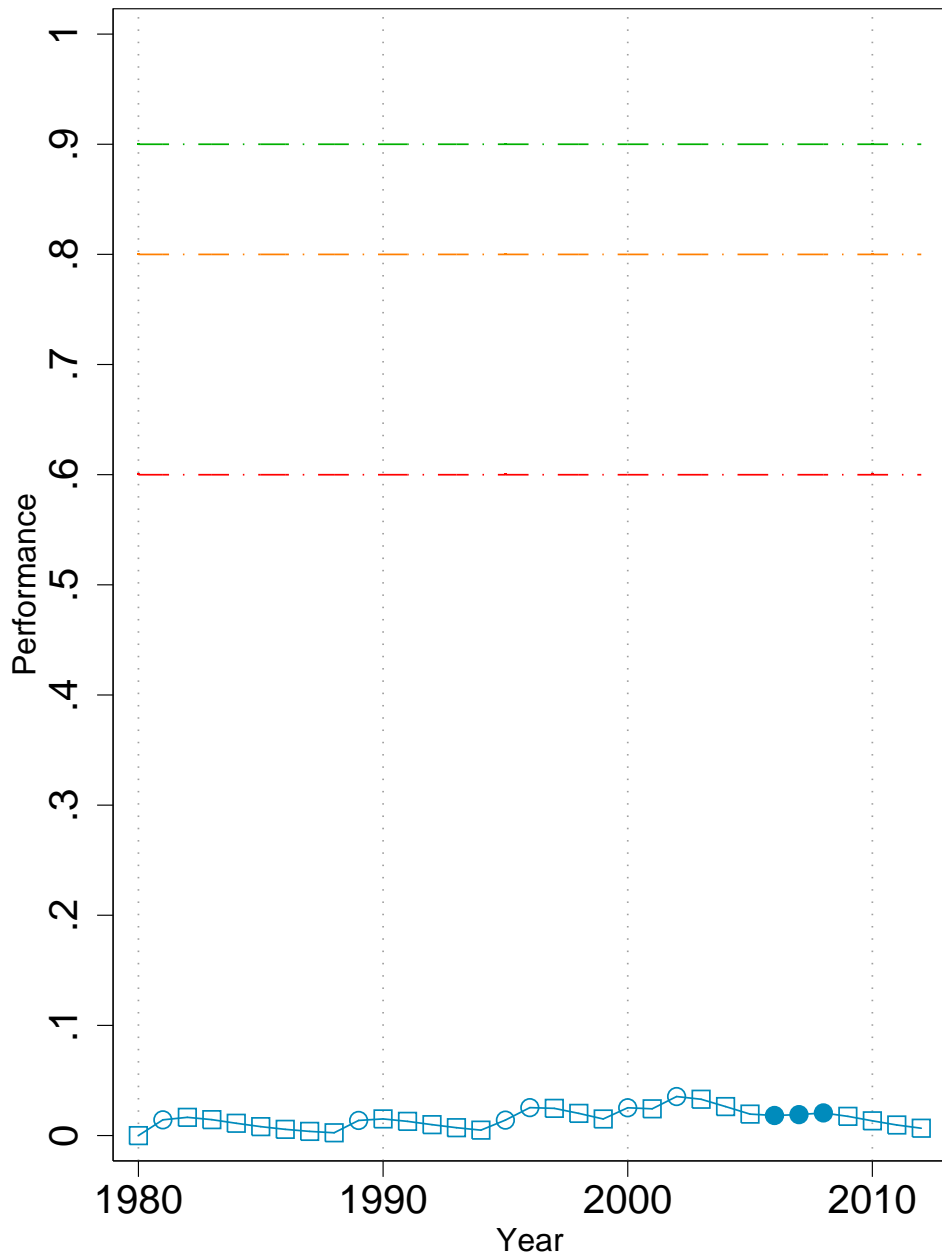

### Completeness

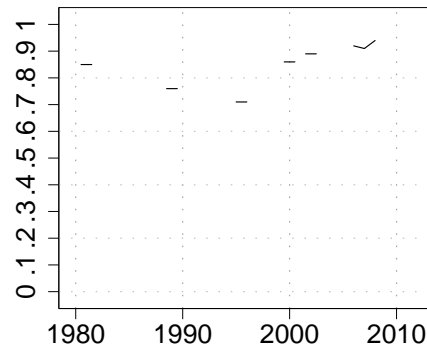

### Garbage Coding

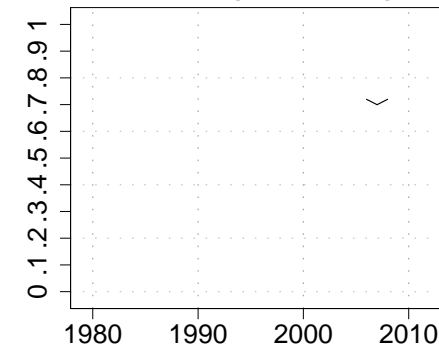

### Length of Cause List

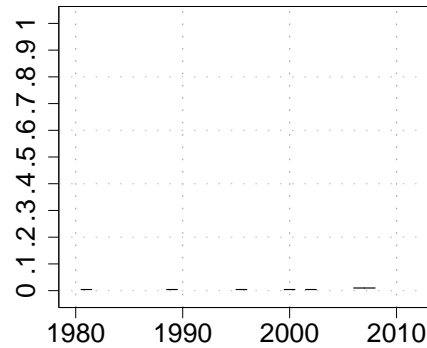

### Age/Sex Unspecified

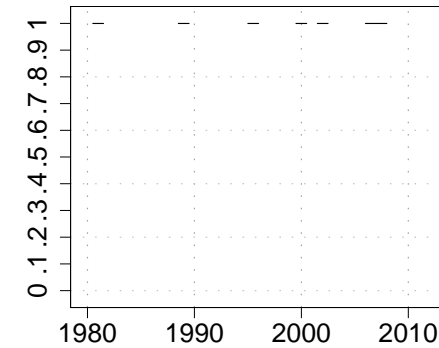

### Medically Impossible Diagnoses

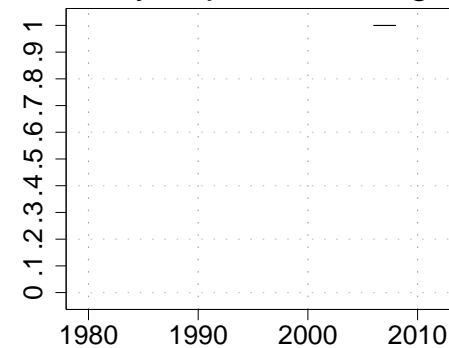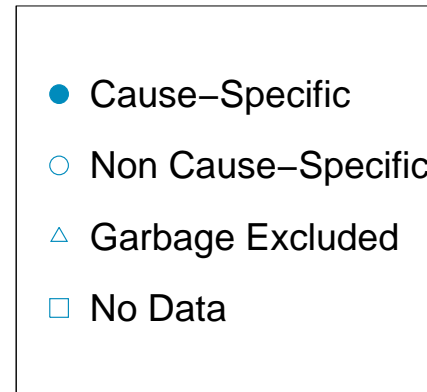

Indicators on their Original (Unweighted) Scale and Subtracted from One Where Necessary so Higher Scores are Preferable to Lower

# Lithuania

## VS Performance Index

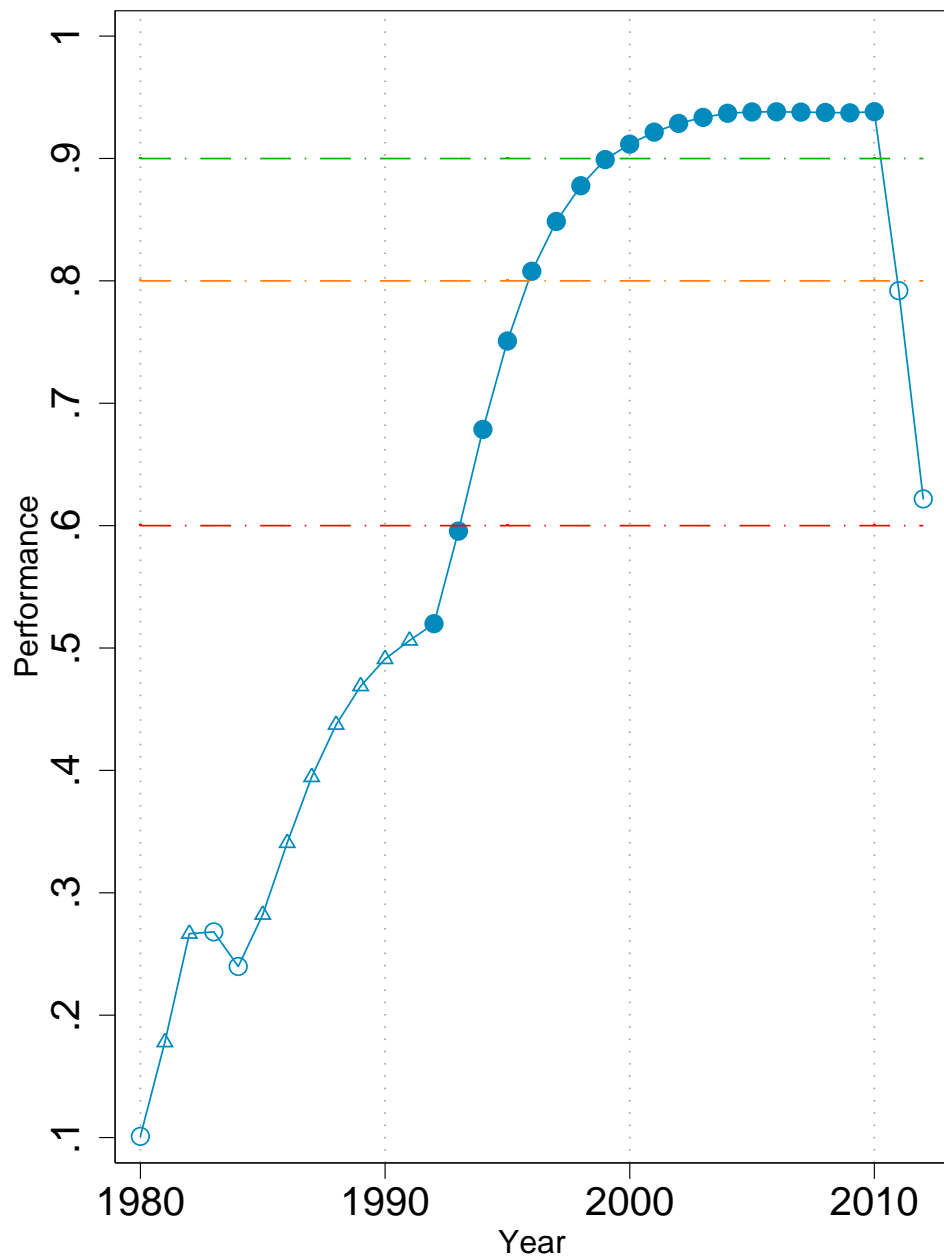

### Completeness

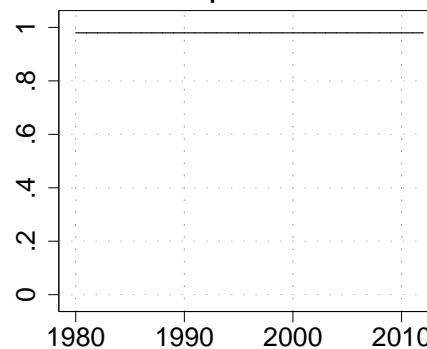

### Garbage Coding

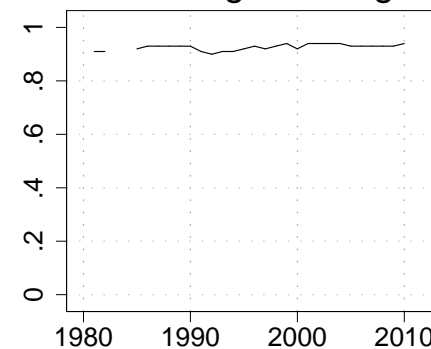

### Length of Cause List

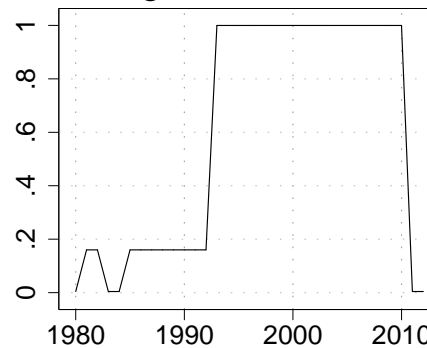

### Age/Sex Unspecified

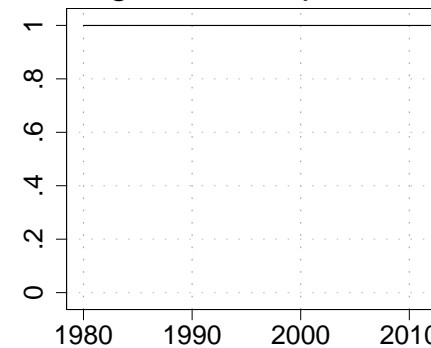

### Medically Impossible Diagnoses

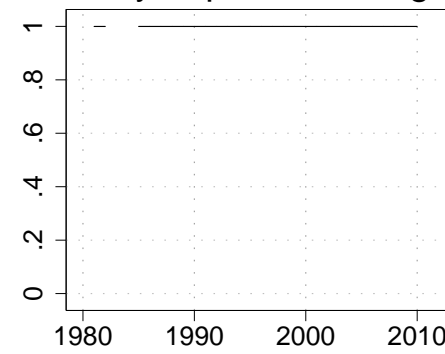

Indicators on their Original (Unweighted) Scale and Subtracted from One Where Necessary so Higher Scores are Preferable to Lower

# Luxembourg VS Performance Index

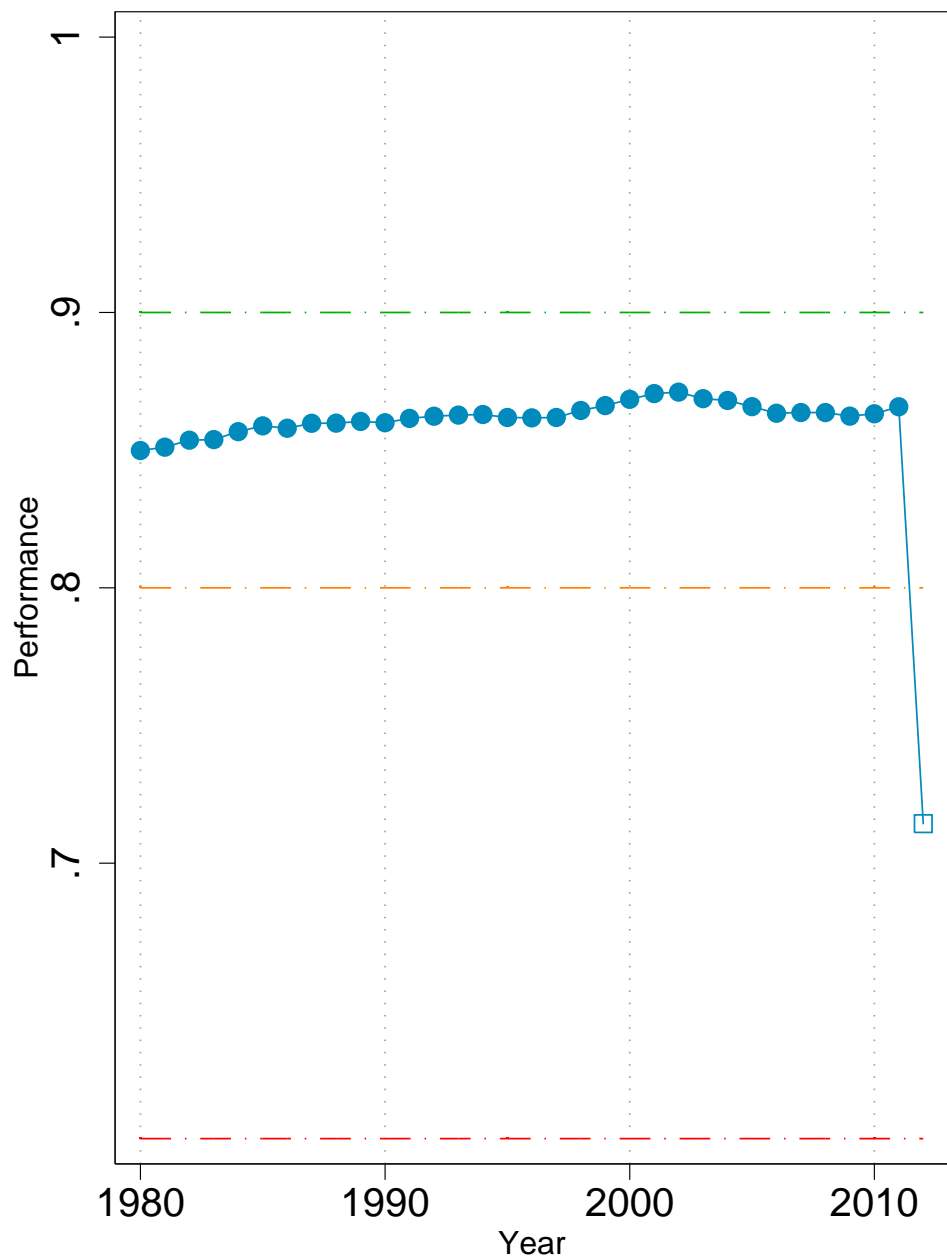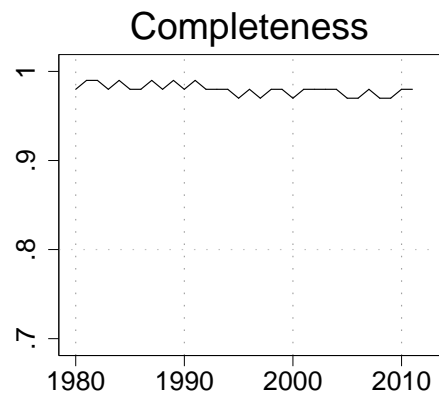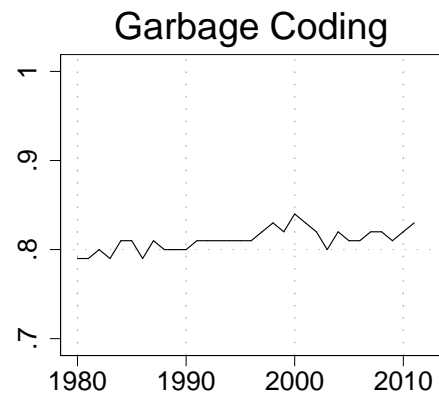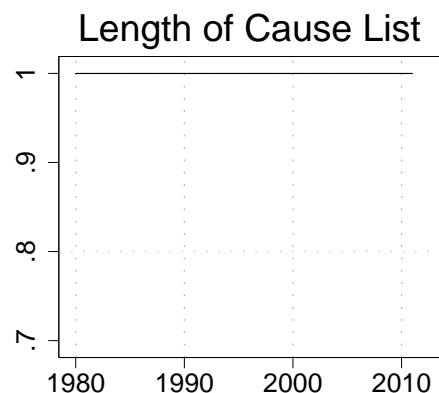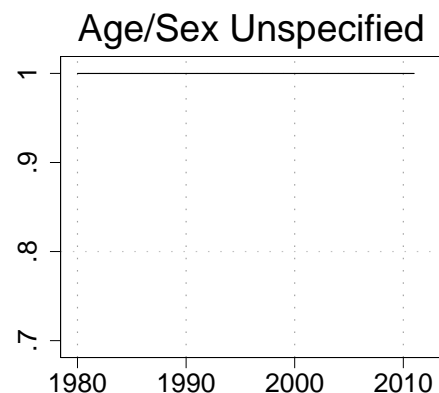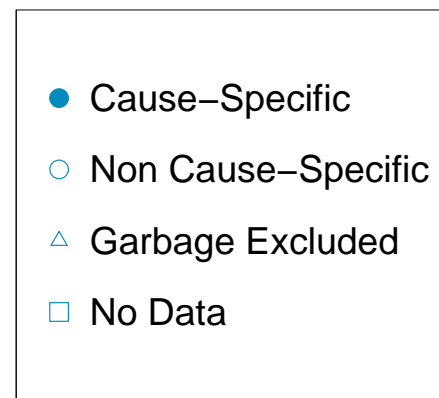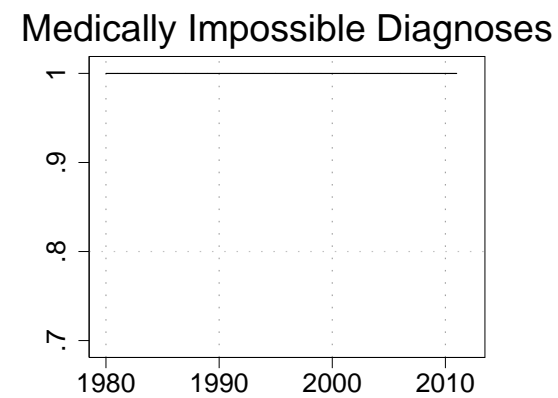

Indicators on their Original (Unweighted) Scale and Subtracted from One Where Necessary so Higher Scores are Preferable to Lower

# Macao

## VS Performance Index

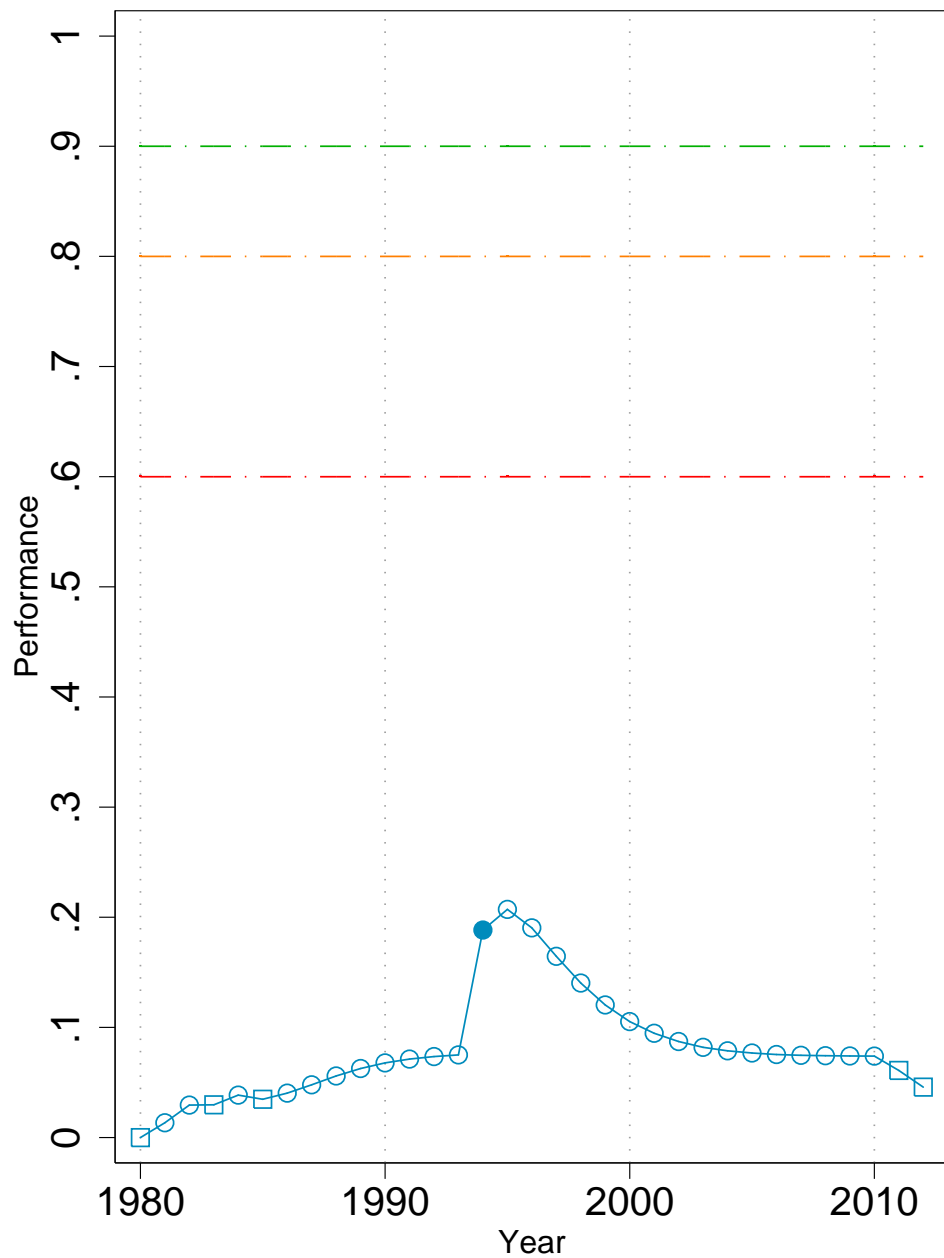

### Completeness

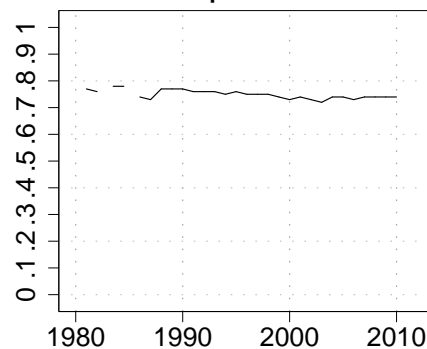

### Garbage Coding

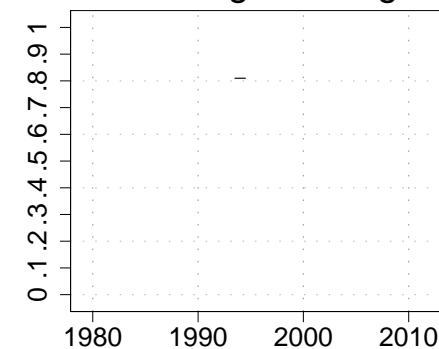

### Length of Cause List

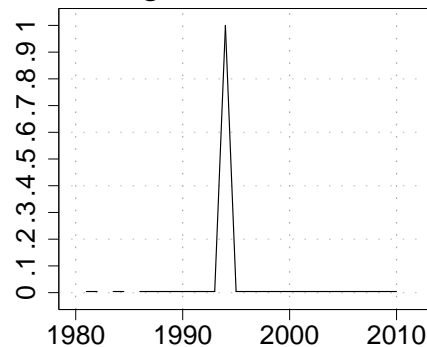

### Age/Sex Unspecified

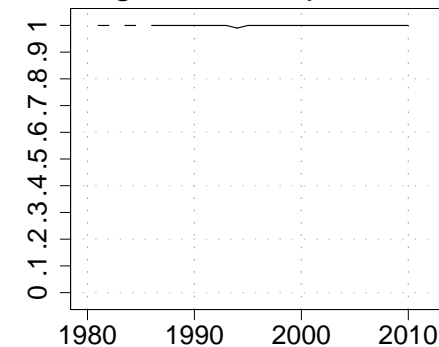

### Medically Impossible Diagnoses

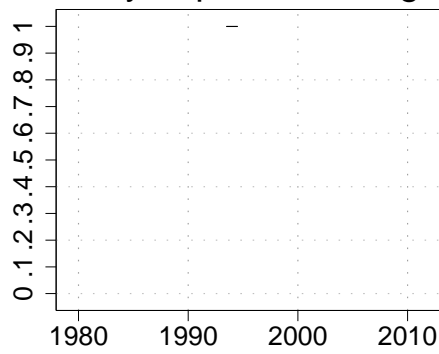

Indicators on their Original (Unweighted) Scale  
and Subtracted from One Where Necessary so Higher Scores are Preferable to Lower

# Macedonia, FYR

## VS Performance Index

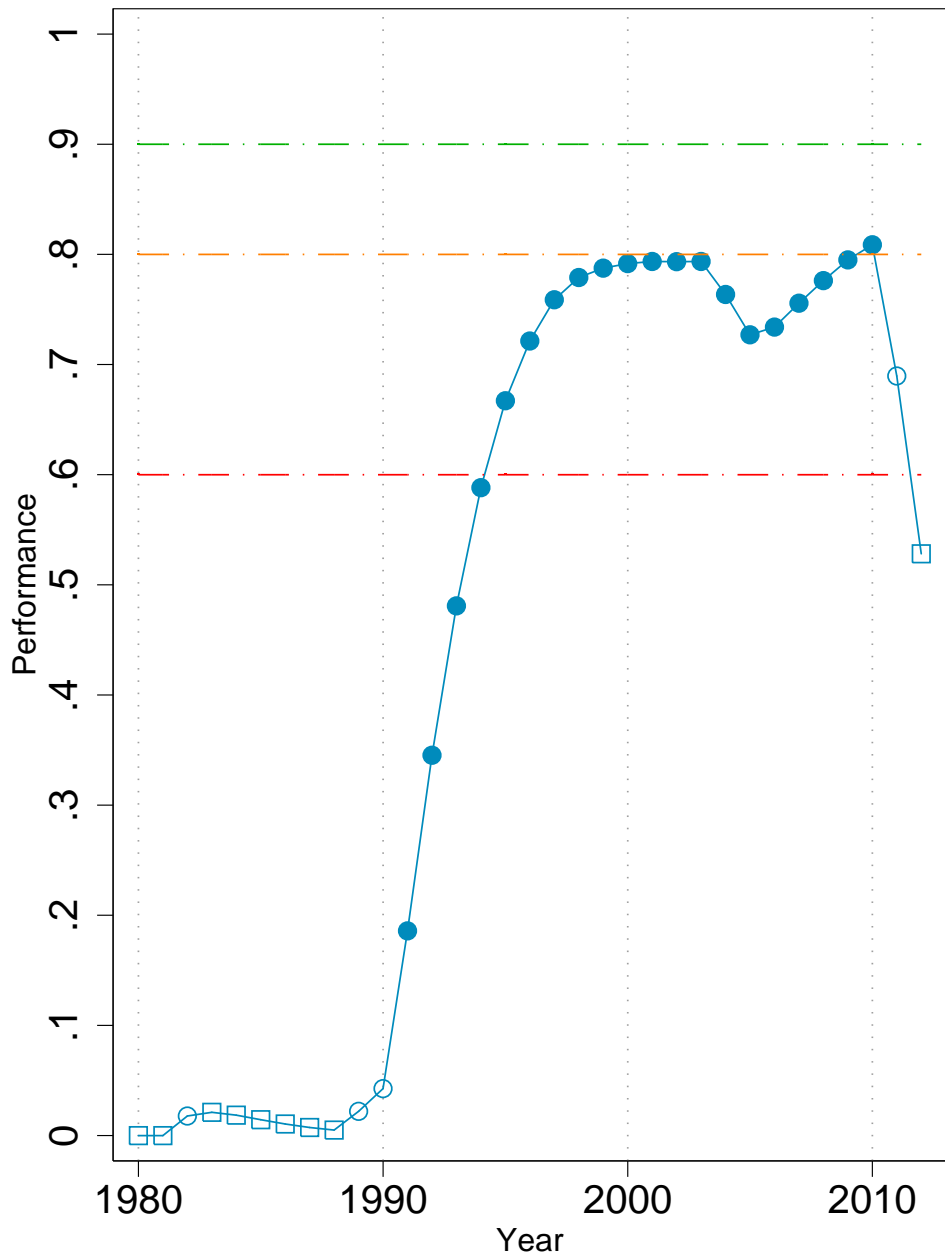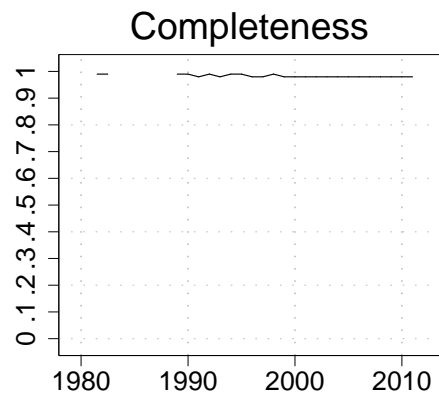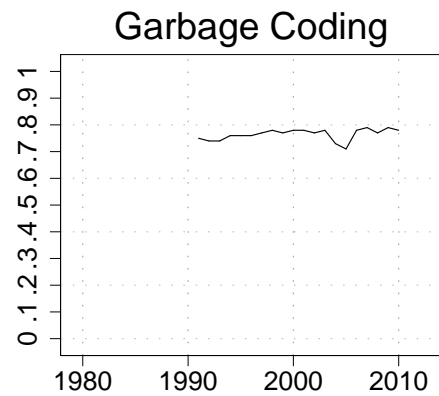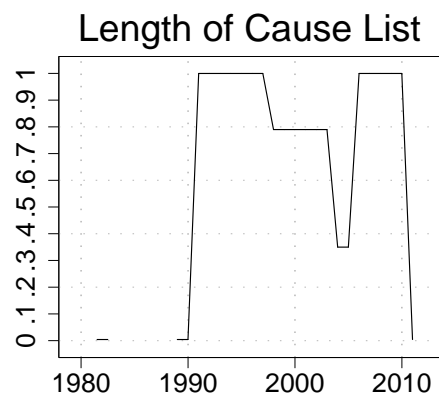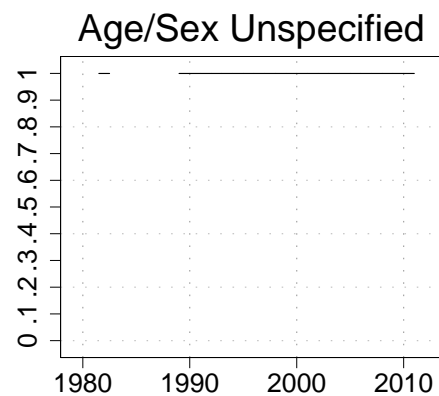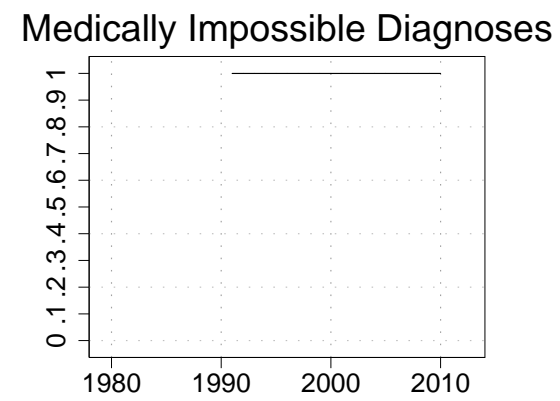

Indicators on their Original (Unweighted) Scale and Subtracted from One Where Necessary so Higher Scores are Preferable to Lower



# Madagascar

## VS Performance Index

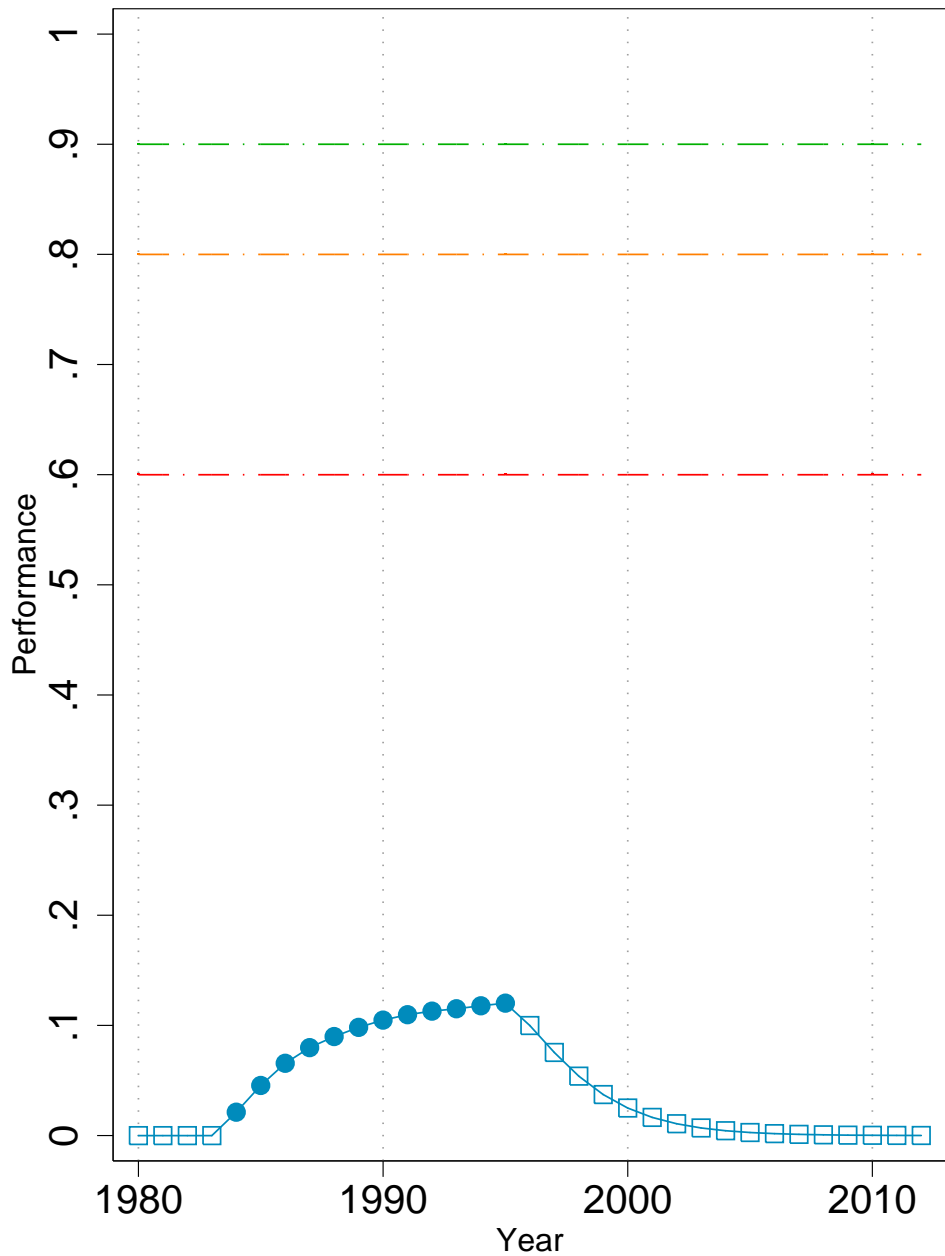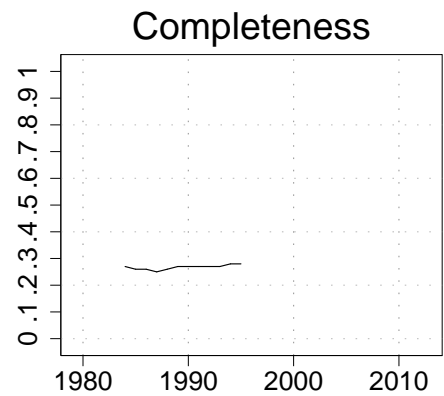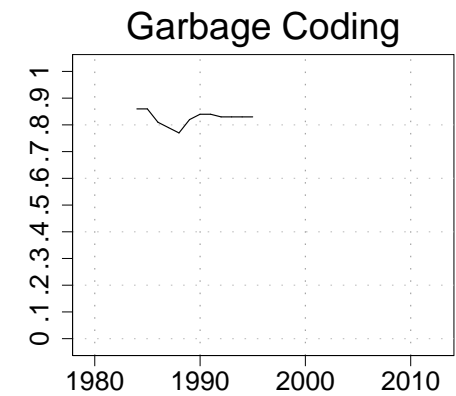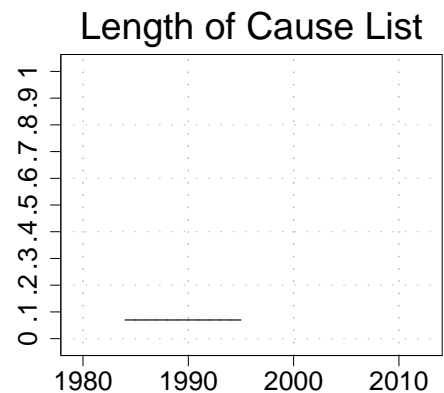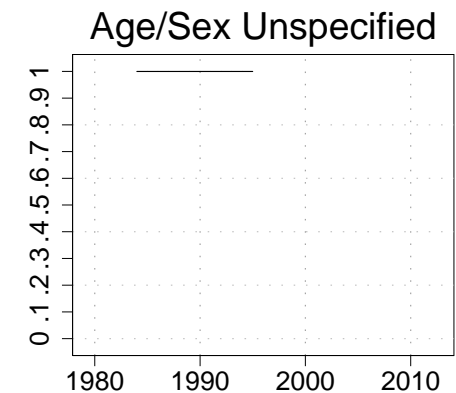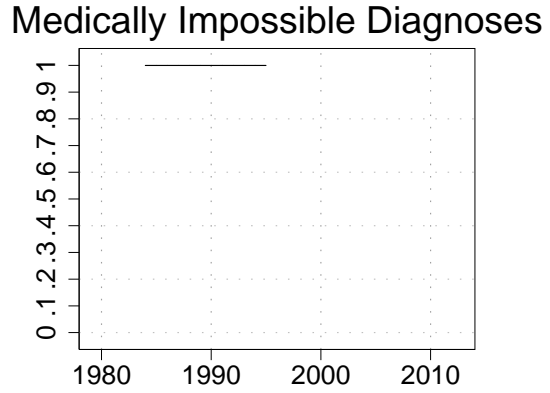

Indicators on their Original (Unweighted) Scale and Subtracted from One Where Necessary so Higher Scores are Preferable to Lower

# Malawi

## VS Performance Index

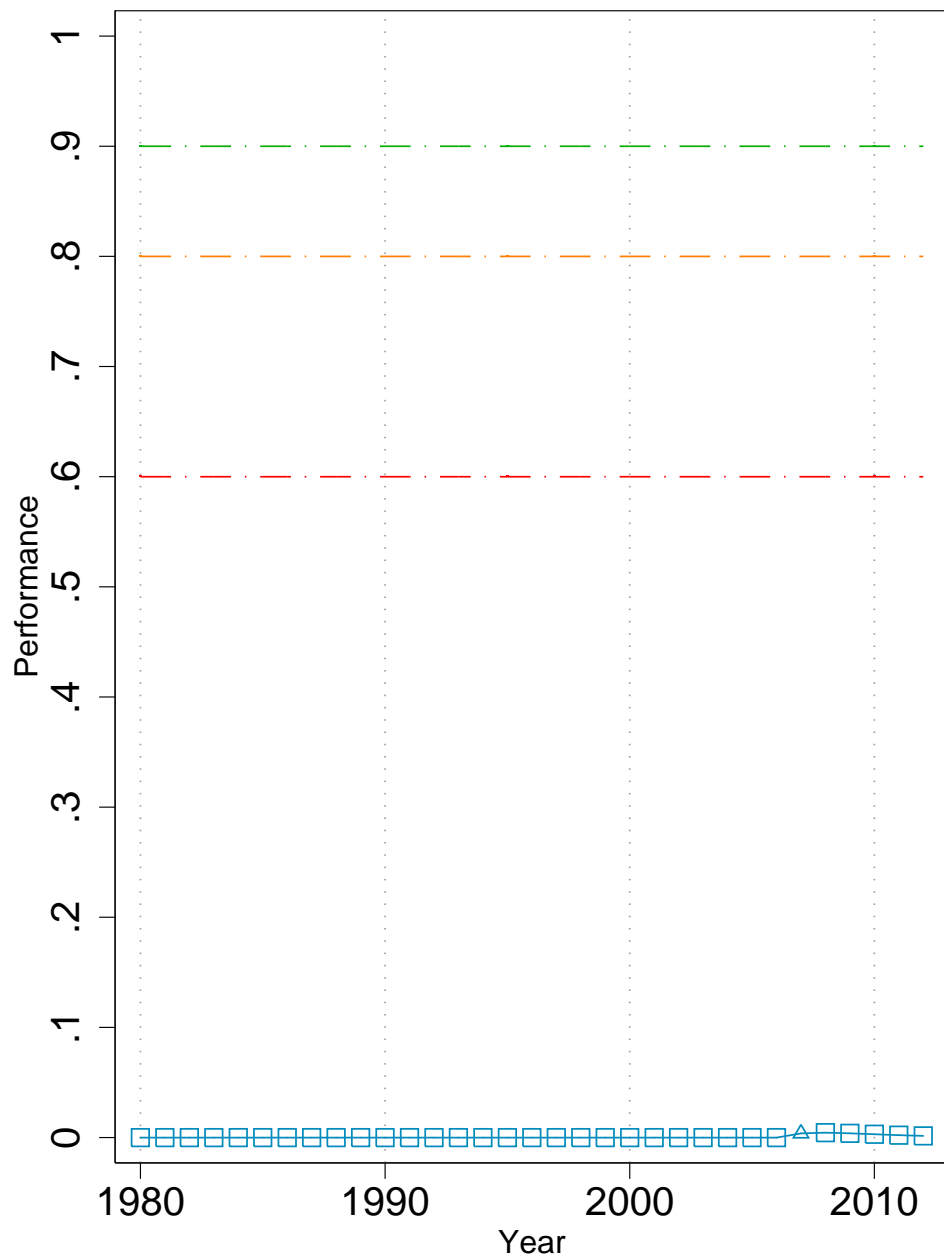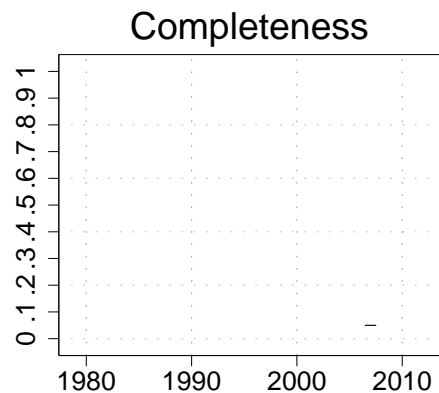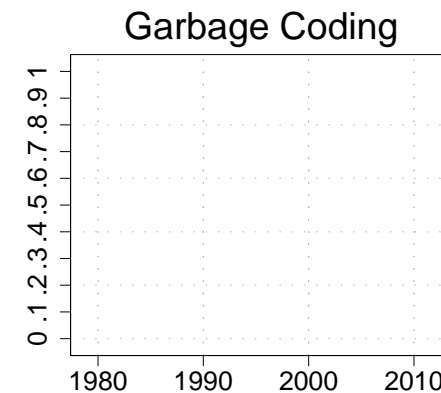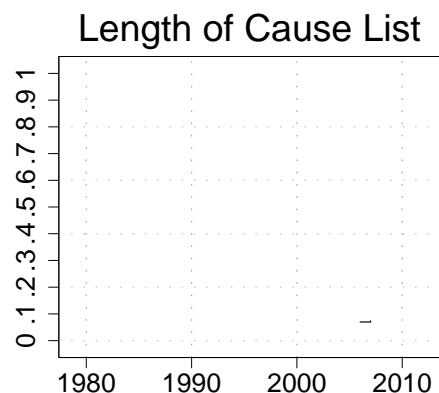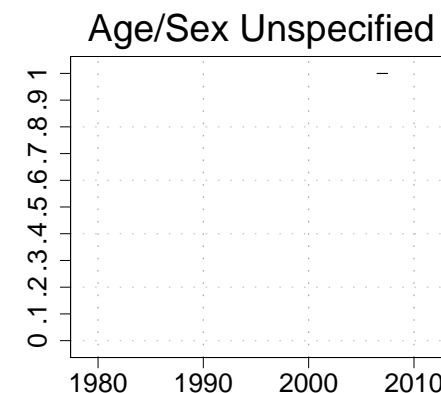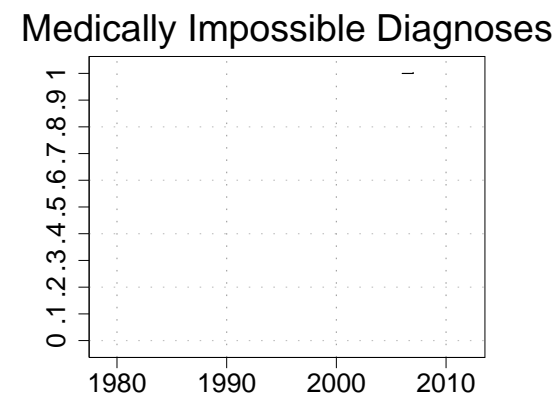

Indicators on their Original (Unweighted) Scale and Subtracted from One Where Necessary so Higher Scores are Preferable to Lower

# Malaysia

## VS Performance Index

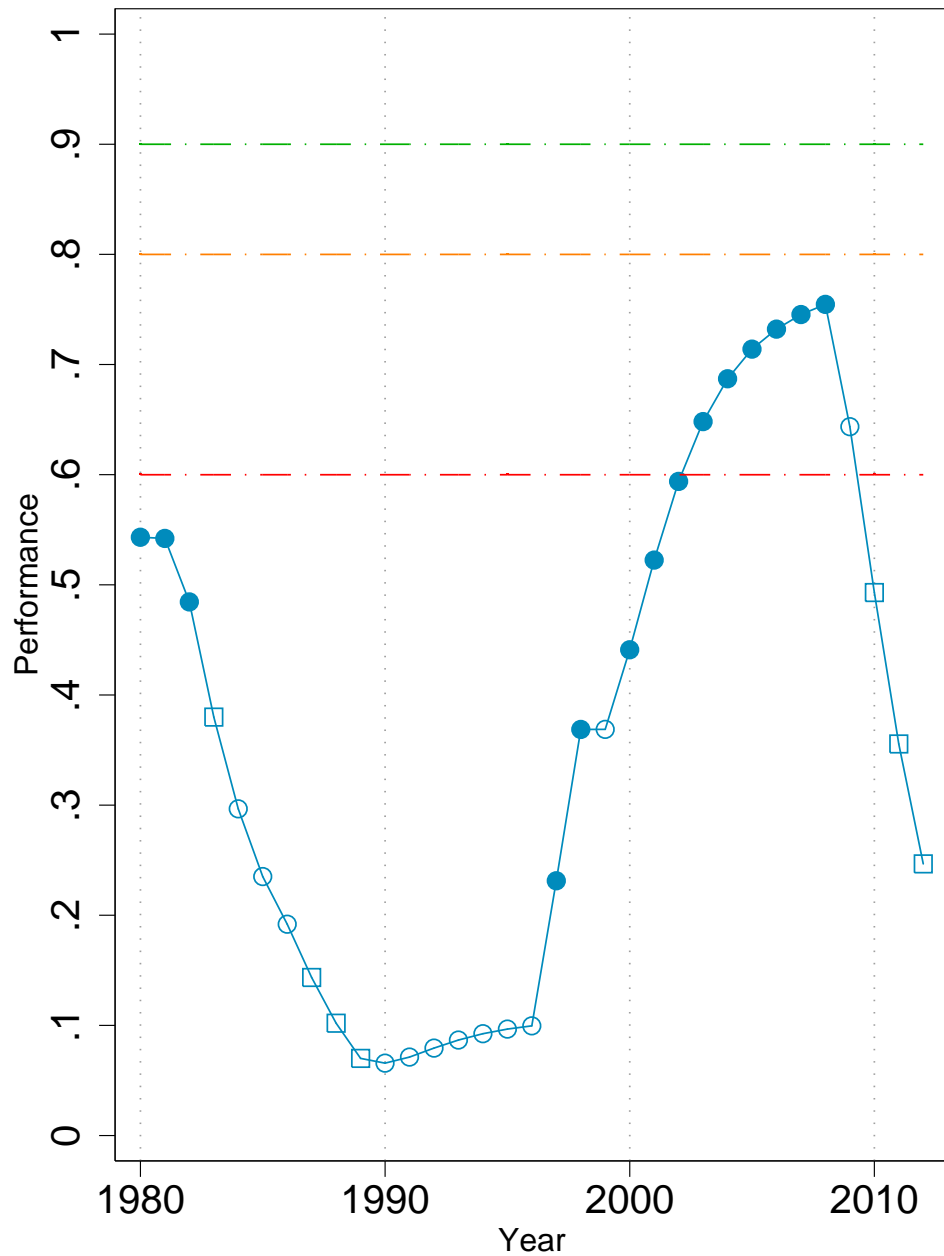

### Completeness

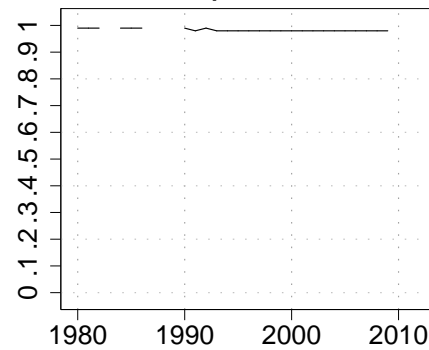

### Garbage Coding

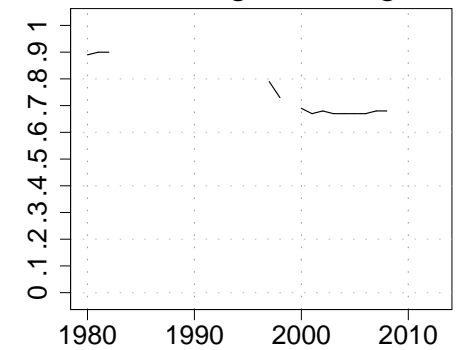

### Length of Cause List

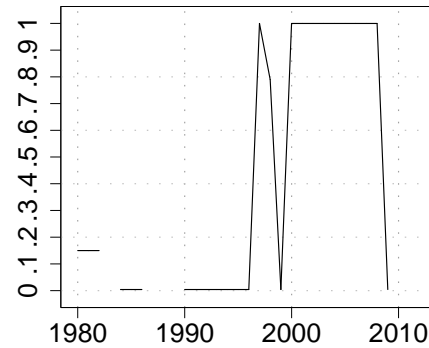

### Age/Sex Unspecified

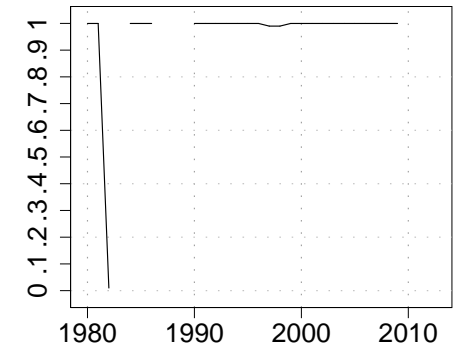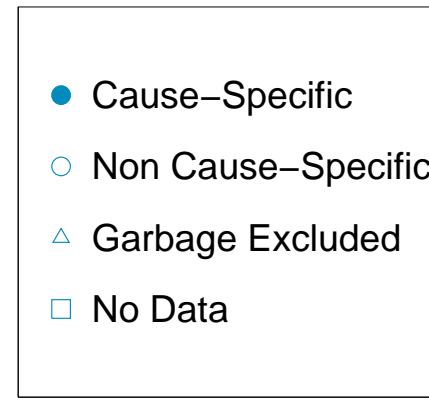

### Medically Impossible Diagnoses

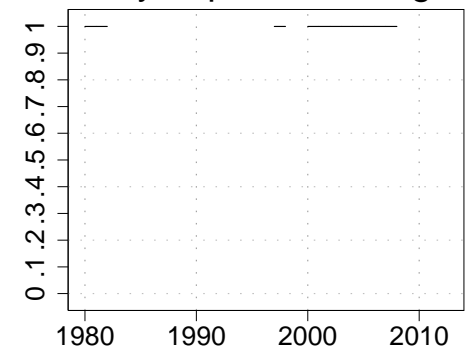

Indicators on their Original (Unweighted) Scale and Subtracted from One Where Necessary so Higher Scores are Preferable to Lower

# Maldives

## VS Performance Index

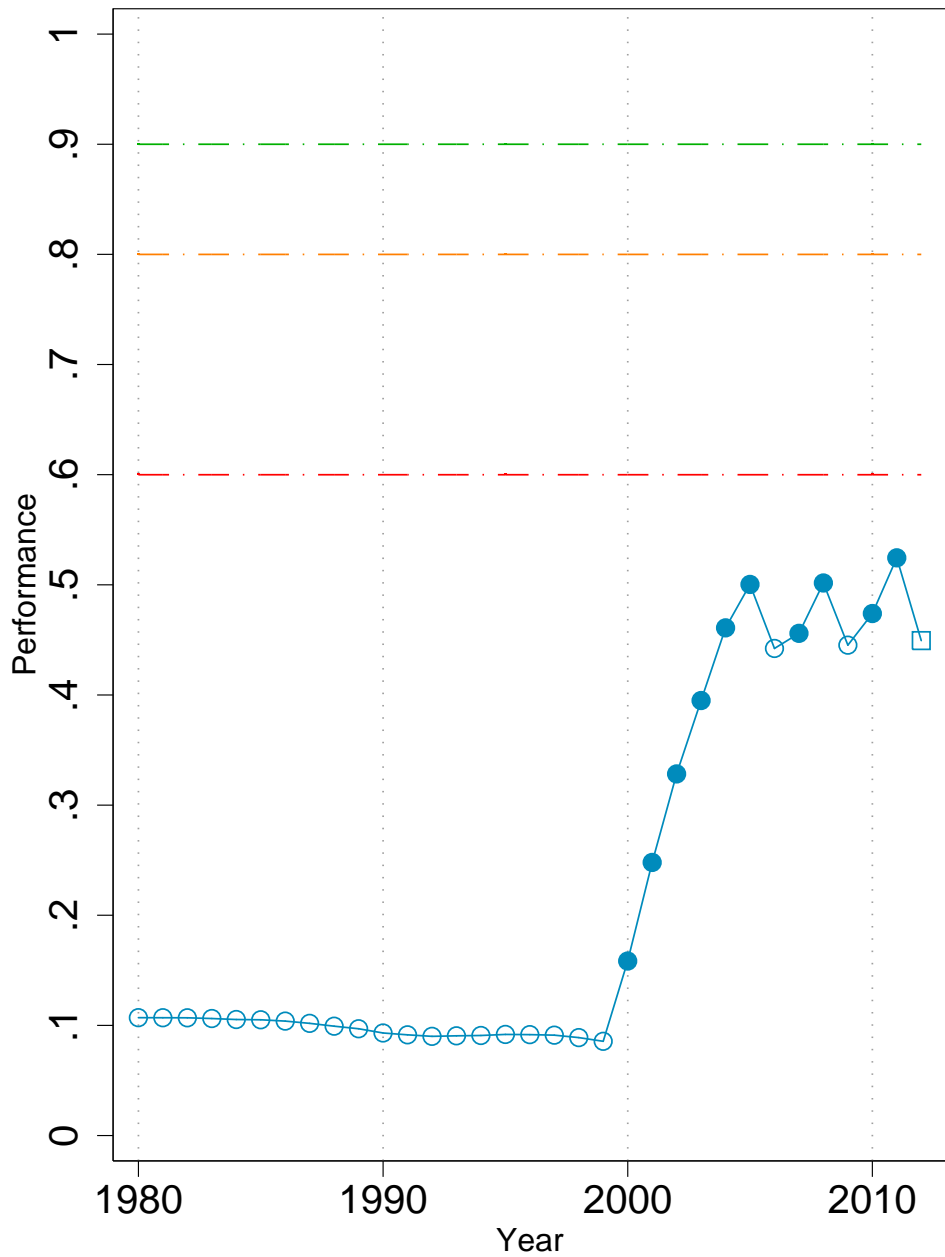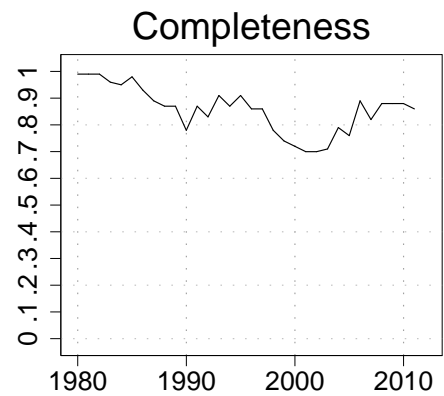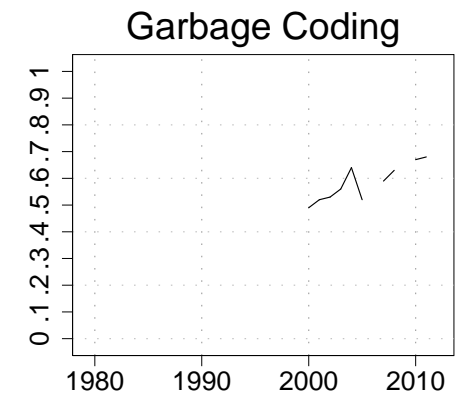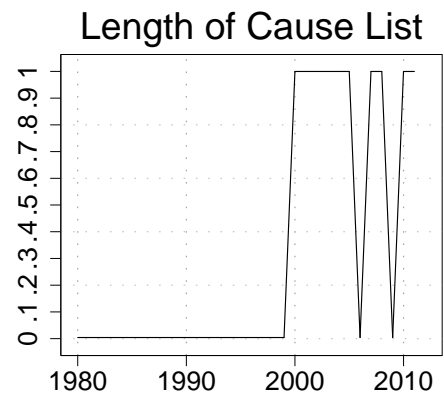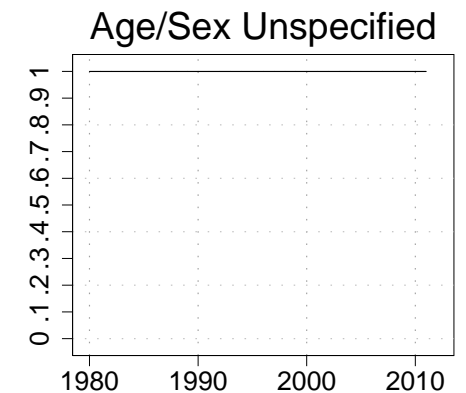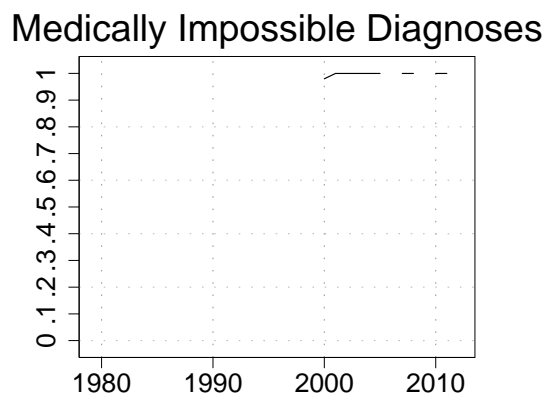

Indicators on their Original (Unweighted) Scale and Subtracted from One Where Necessary so Higher Scores are Preferable to Lower

# Mali

## VS Performance Index

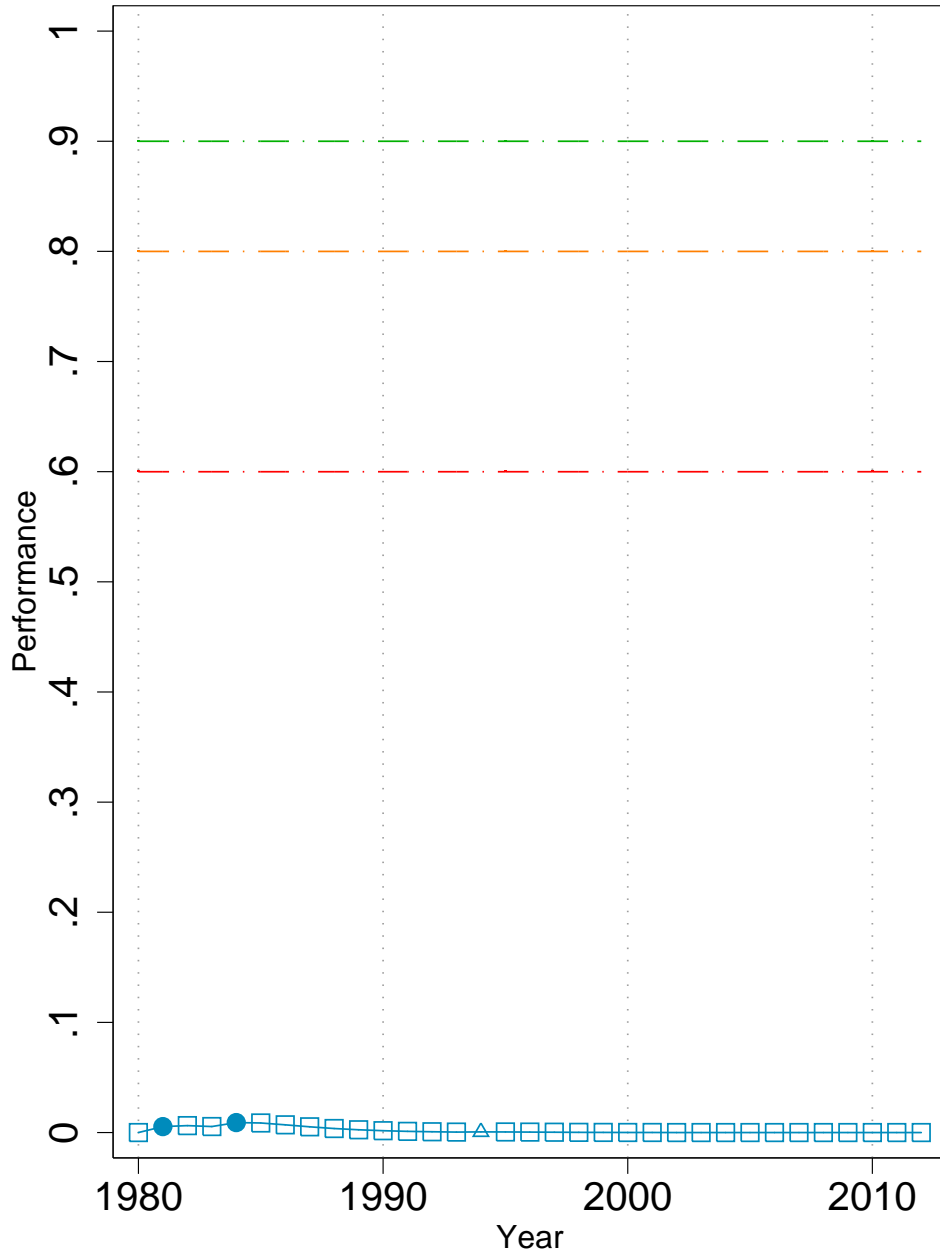

## Completeness

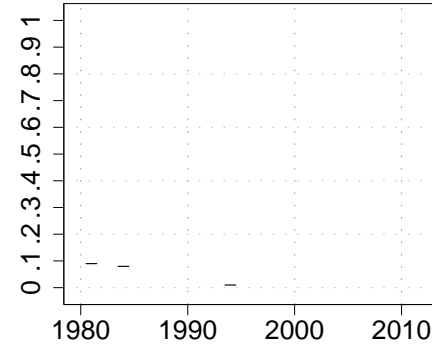

## Garbage Coding

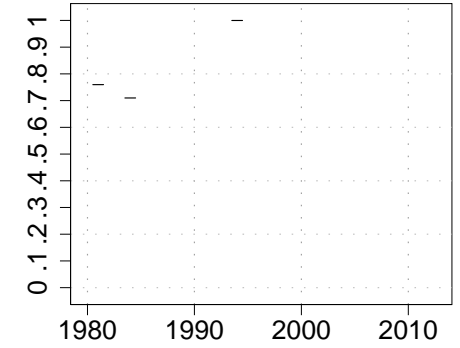

## Length of Cause List

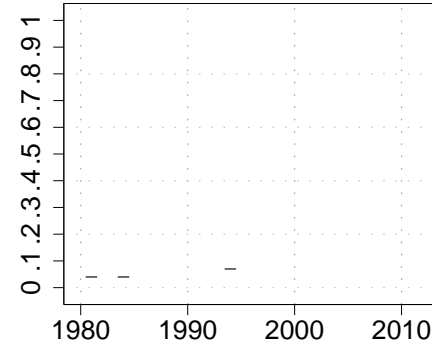

## Age/Sex Unspecified

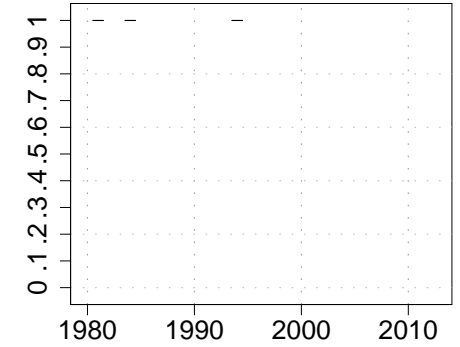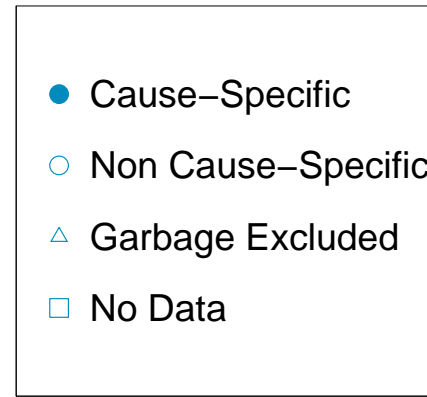

## Medically Impossible Diagnoses

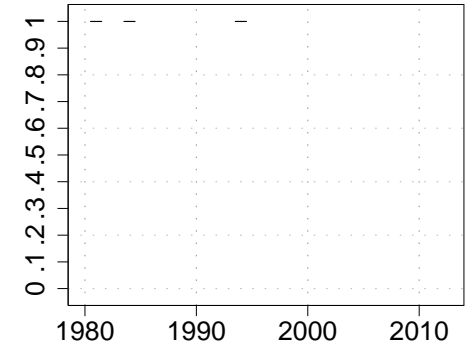

Indicators on their Original (Unweighted) Scale and Subtracted from One Where Necessary so Higher Scores are Preferable to Lower

# Malta

## VS Performance Index

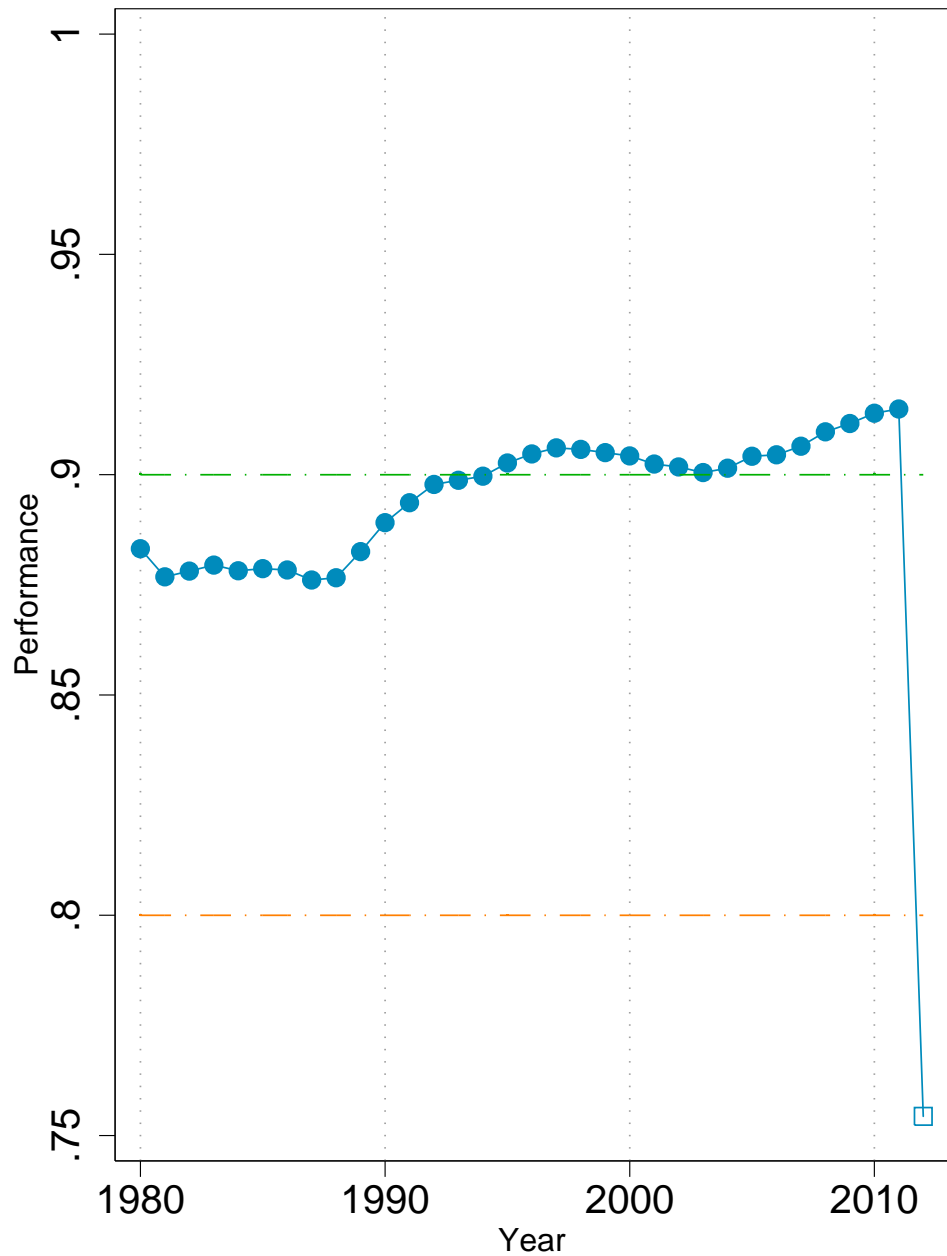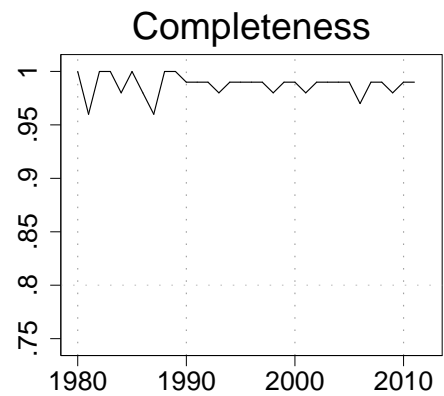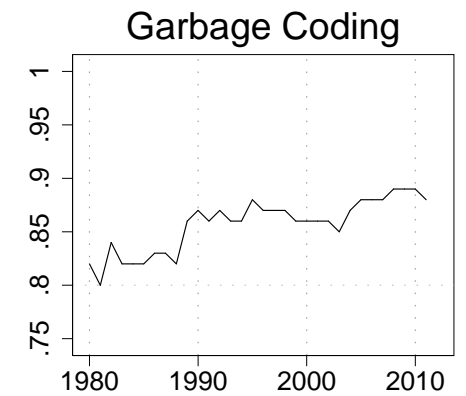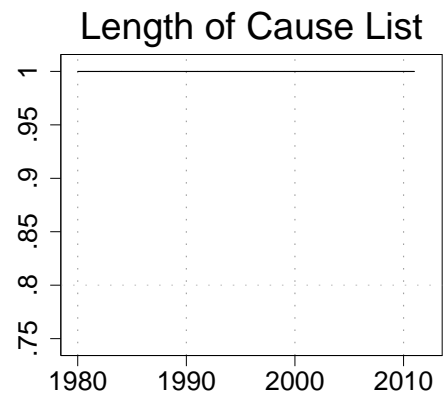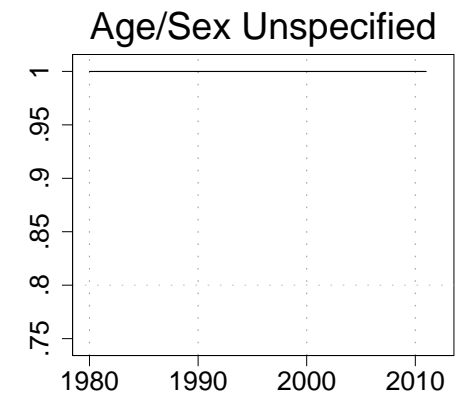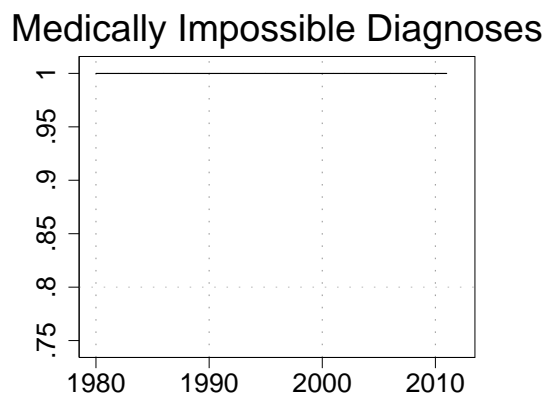

Indicators on their Original (Unweighted) Scale and Subtracted from One Where Necessary so Higher Scores are Preferable to Lower

# Marshall Islands

## VS Performance Index

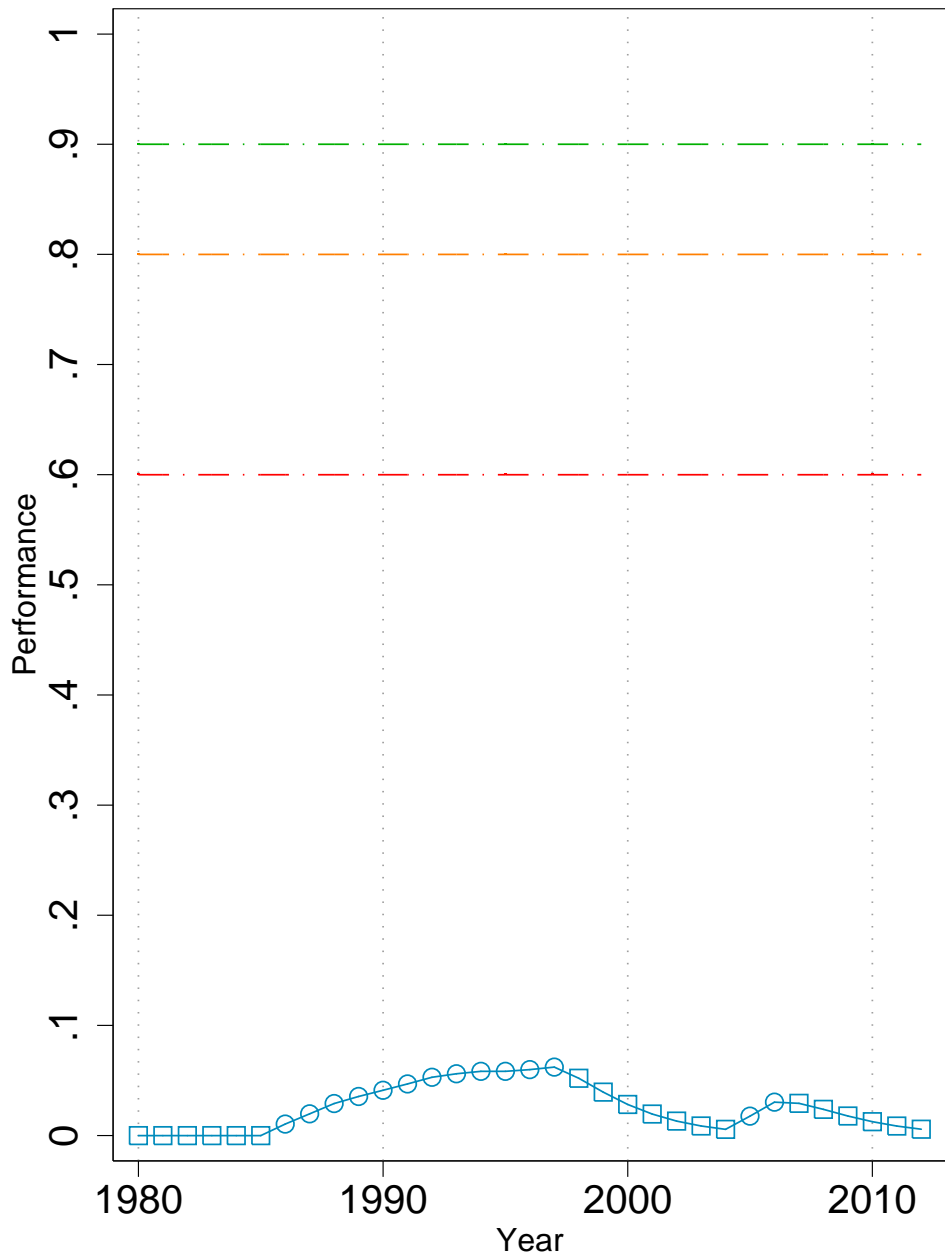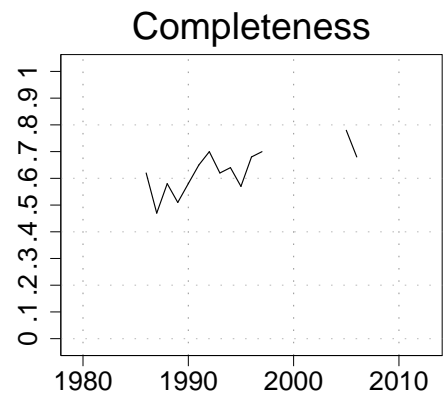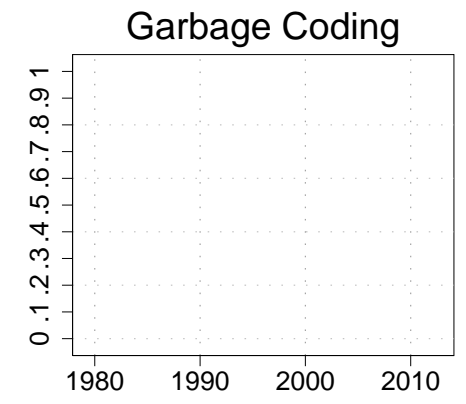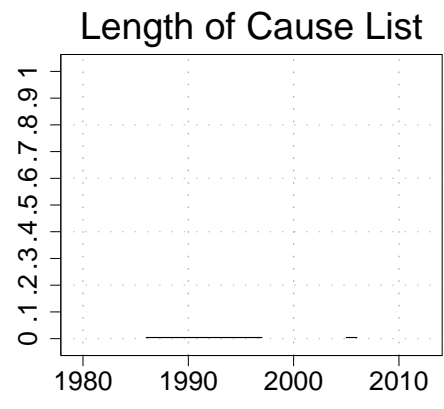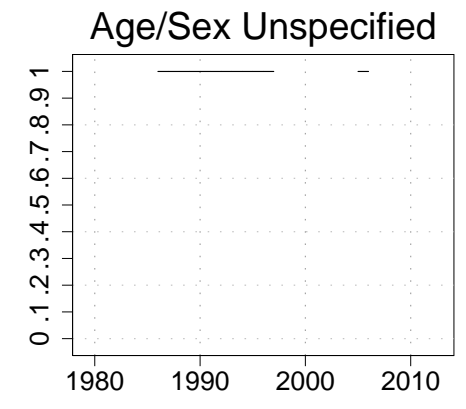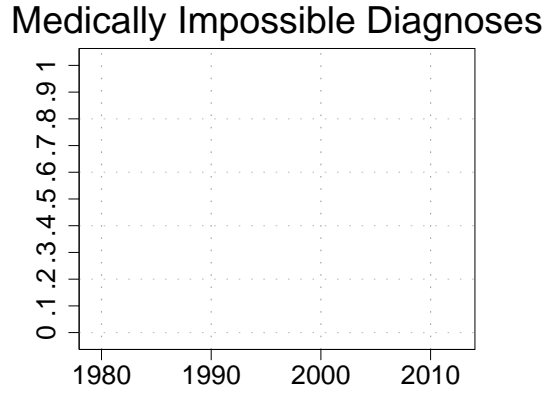

Indicators on their Original (Unweighted) Scale and Subtracted from One Where Necessary so Higher Scores are Preferable to Lower

# Mauritius

## VS Performance Index

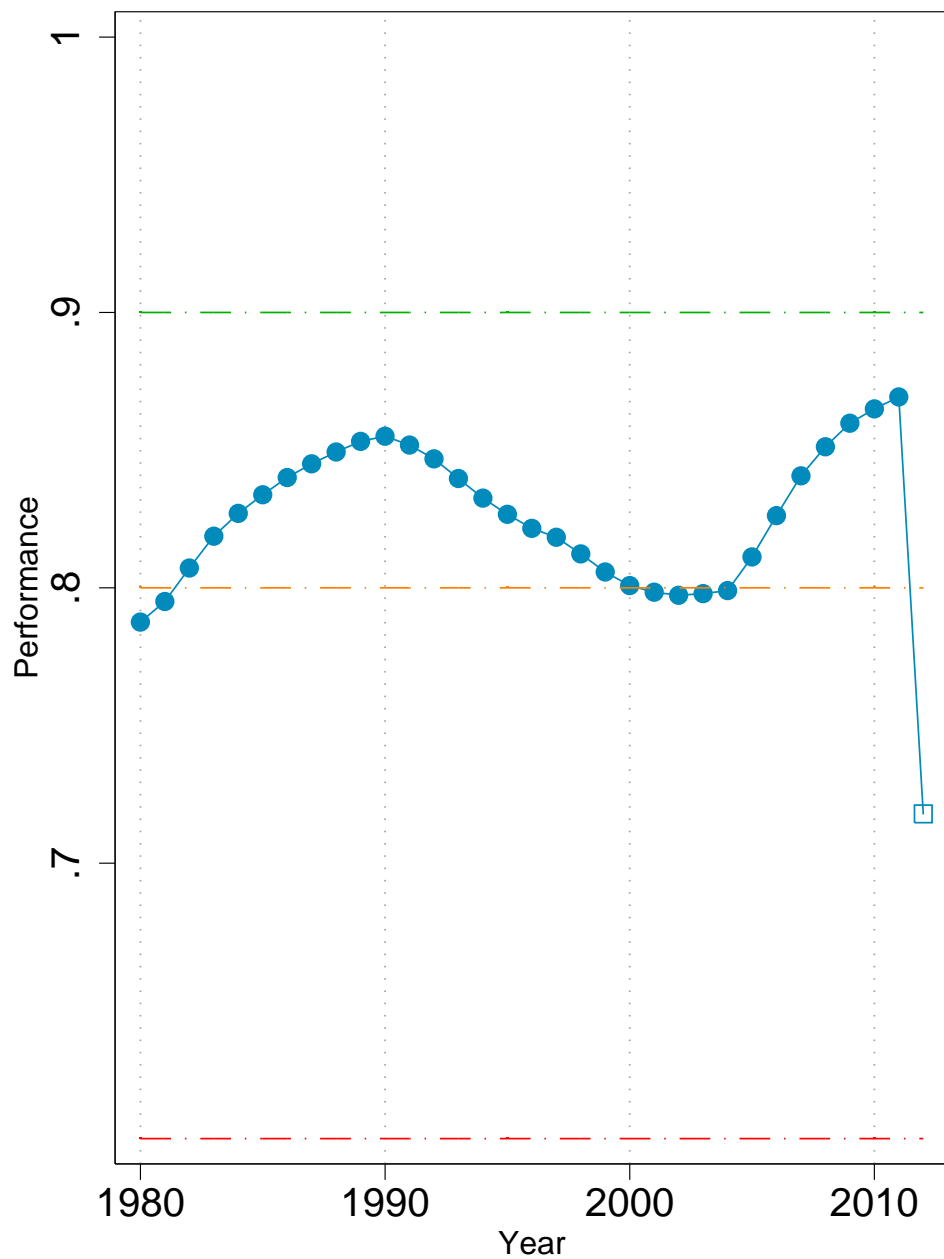

### Completeness

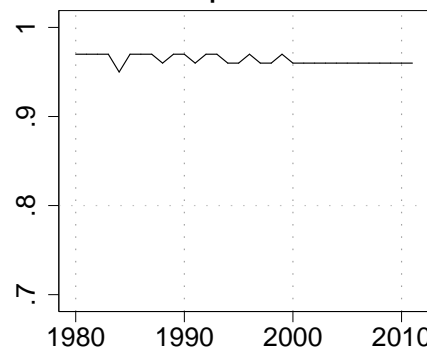

### Garbage Coding

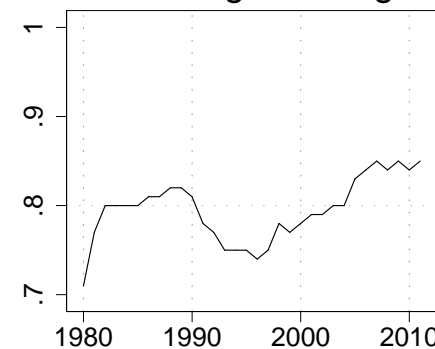

### Length of Cause List

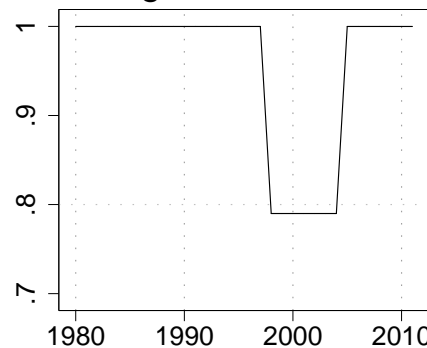

### Age/Sex Unspecified

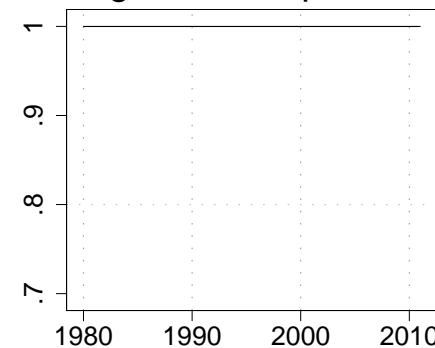

### Medically Impossible Diagnoses

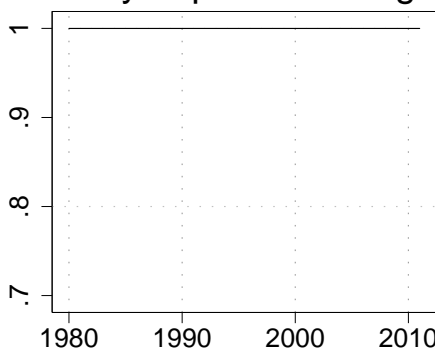

Indicators on their Original (Unweighted) Scale and Subtracted from One Where Necessary so Higher Scores are Preferable to Lower



# Mexico

## VS Performance Index

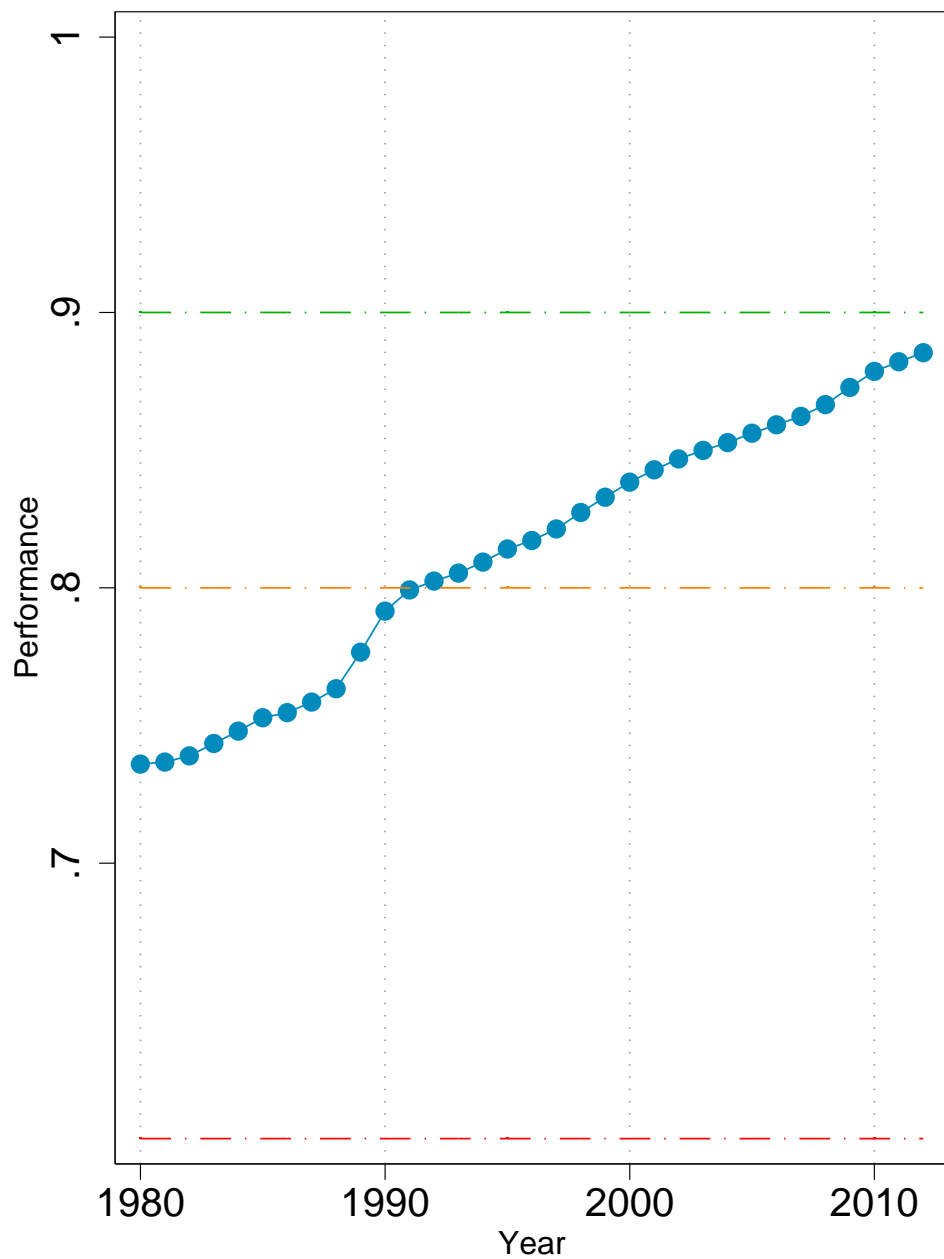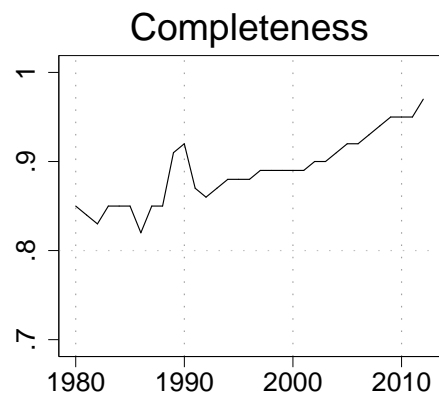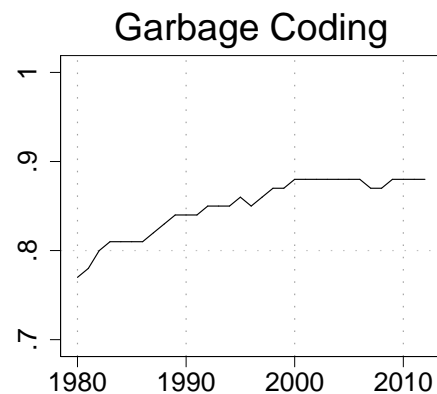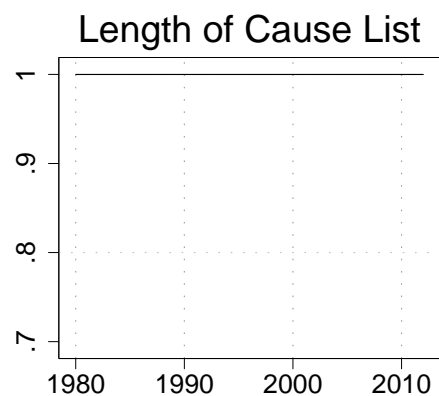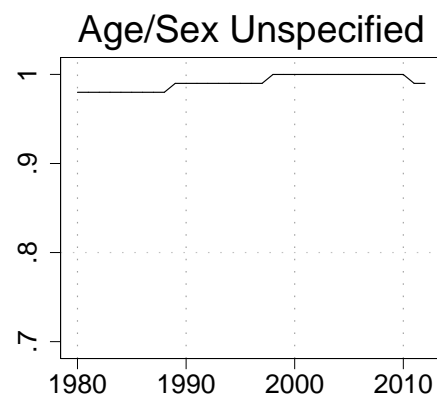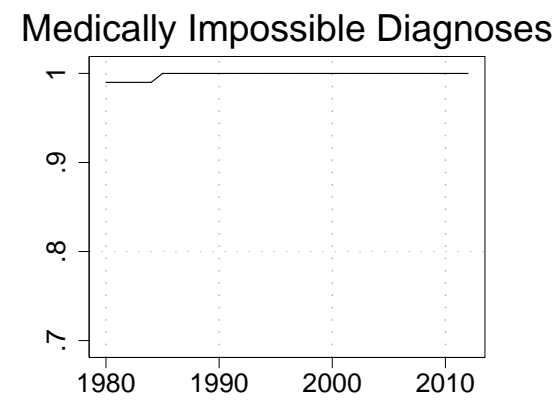

Indicators on their Original (Unweighted) Scale and Subtracted from One Where Necessary so Higher Scores are Preferable to Lower

# Micronesia, Federated States of VS Performance Index

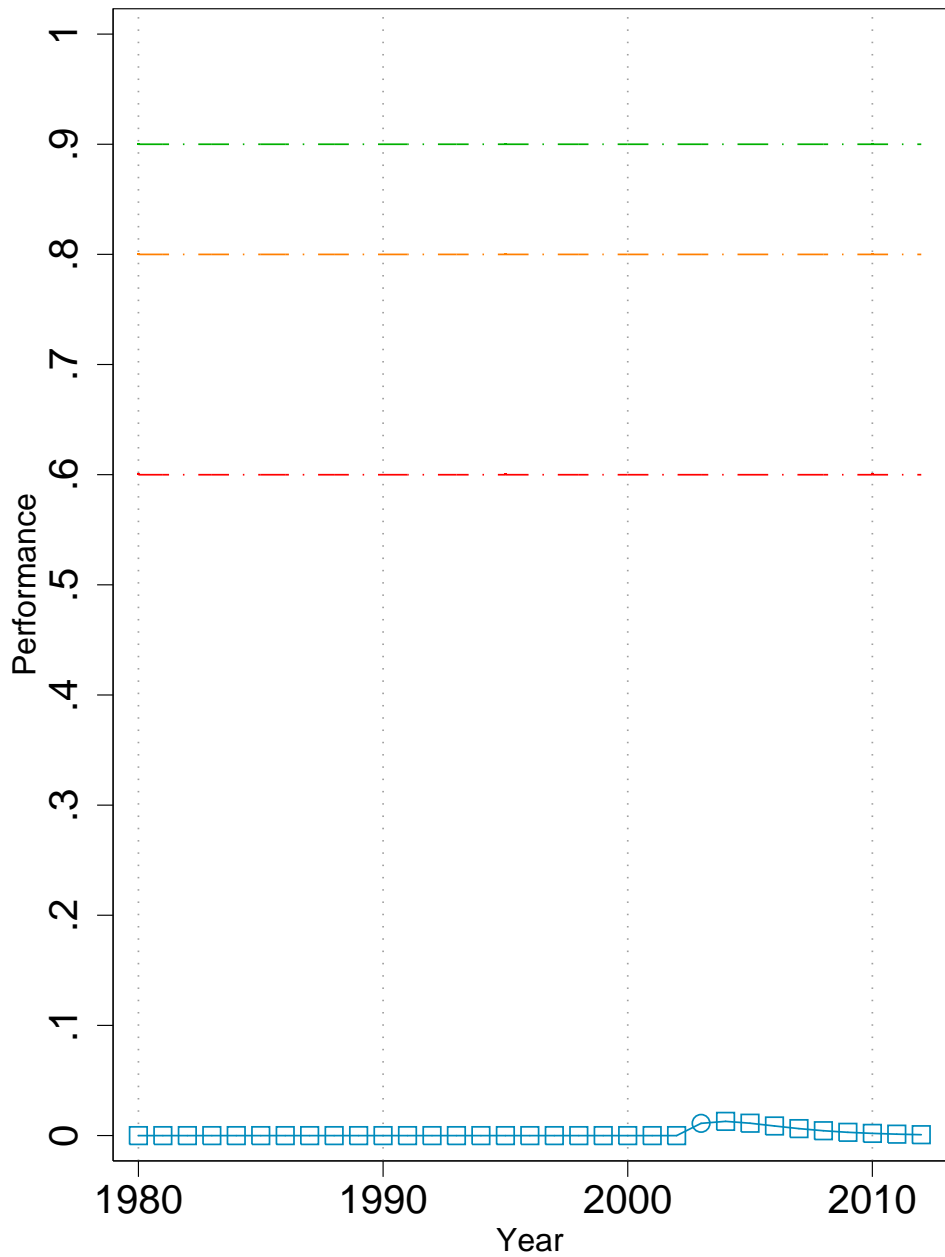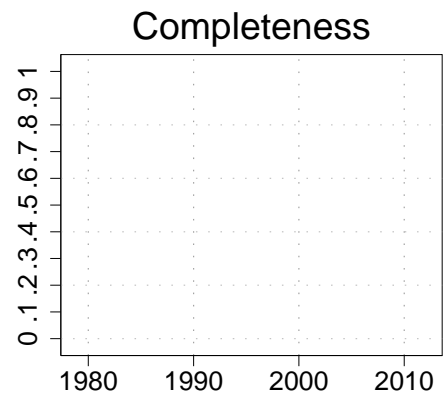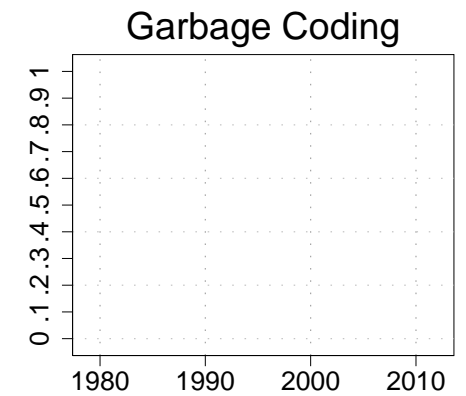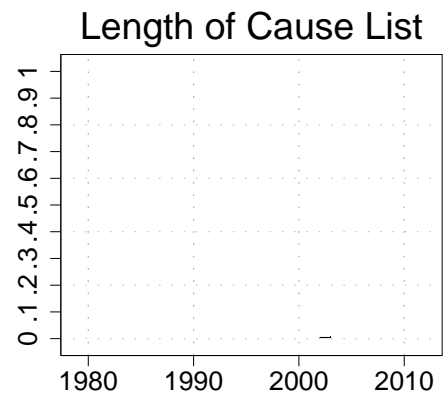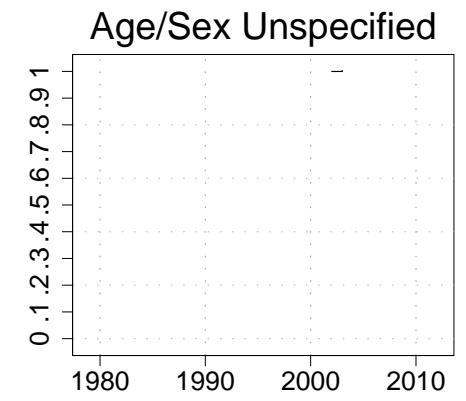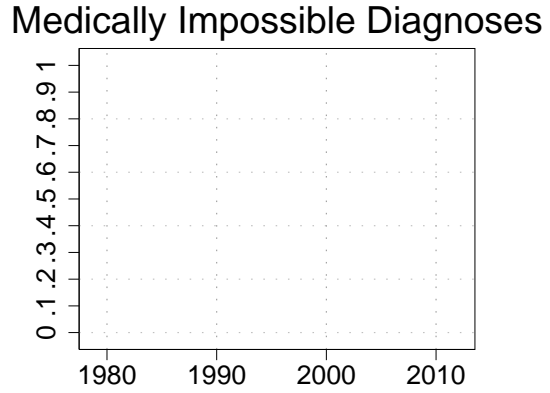

Indicators on their Original (Unweighted) Scale and Subtracted from One Where Necessary so Higher Scores are Preferable to Lower

# Moldova

## VS Performance Index

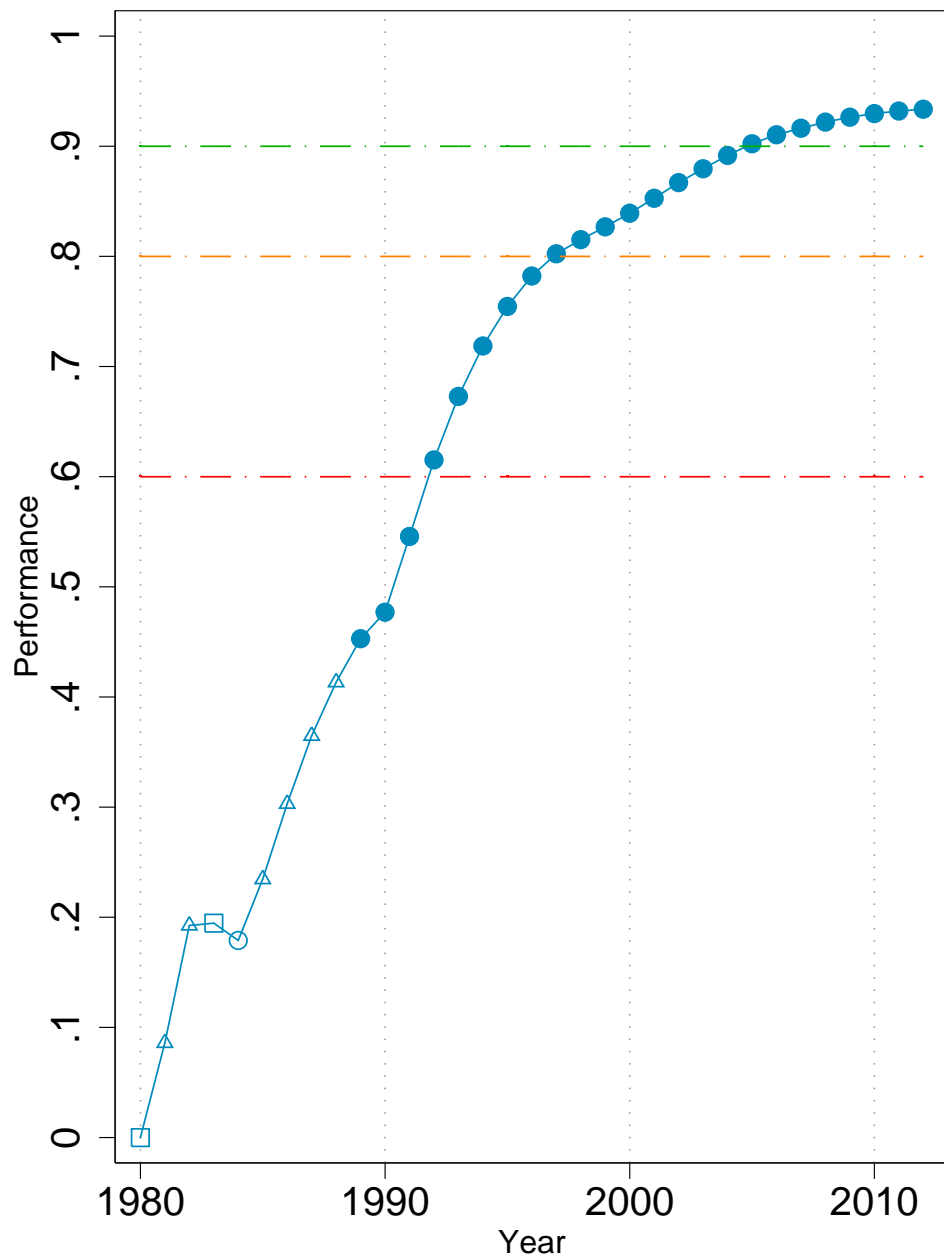

### Completeness

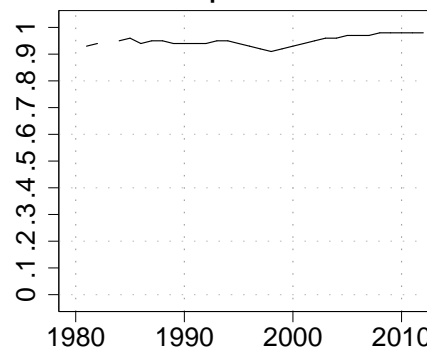

### Garbage Coding

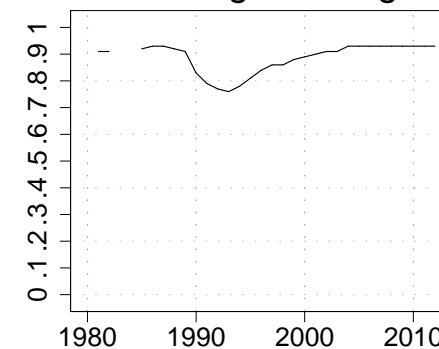

### Length of Cause List

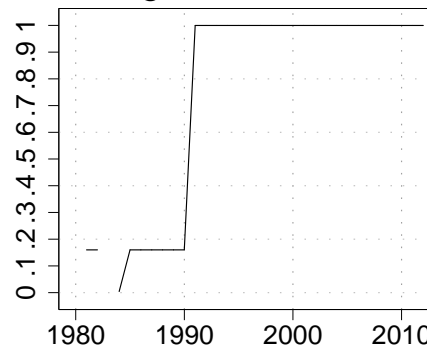

### Age/Sex Unspecified

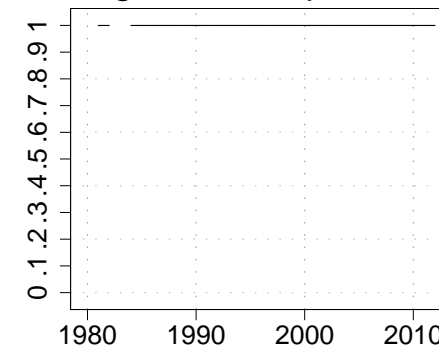

### Medically Impossible Diagnoses

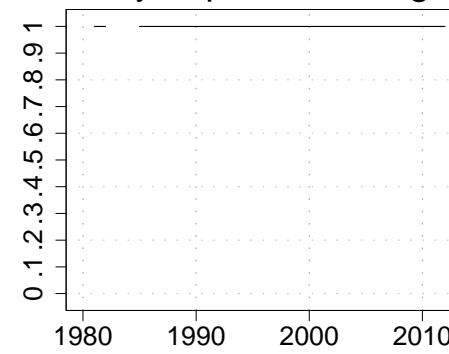

Indicators on their Original (Unweighted) Scale and Subtracted from One Where Necessary so Higher Scores are Preferable to Lower

# Mongolia

## VS Performance Index

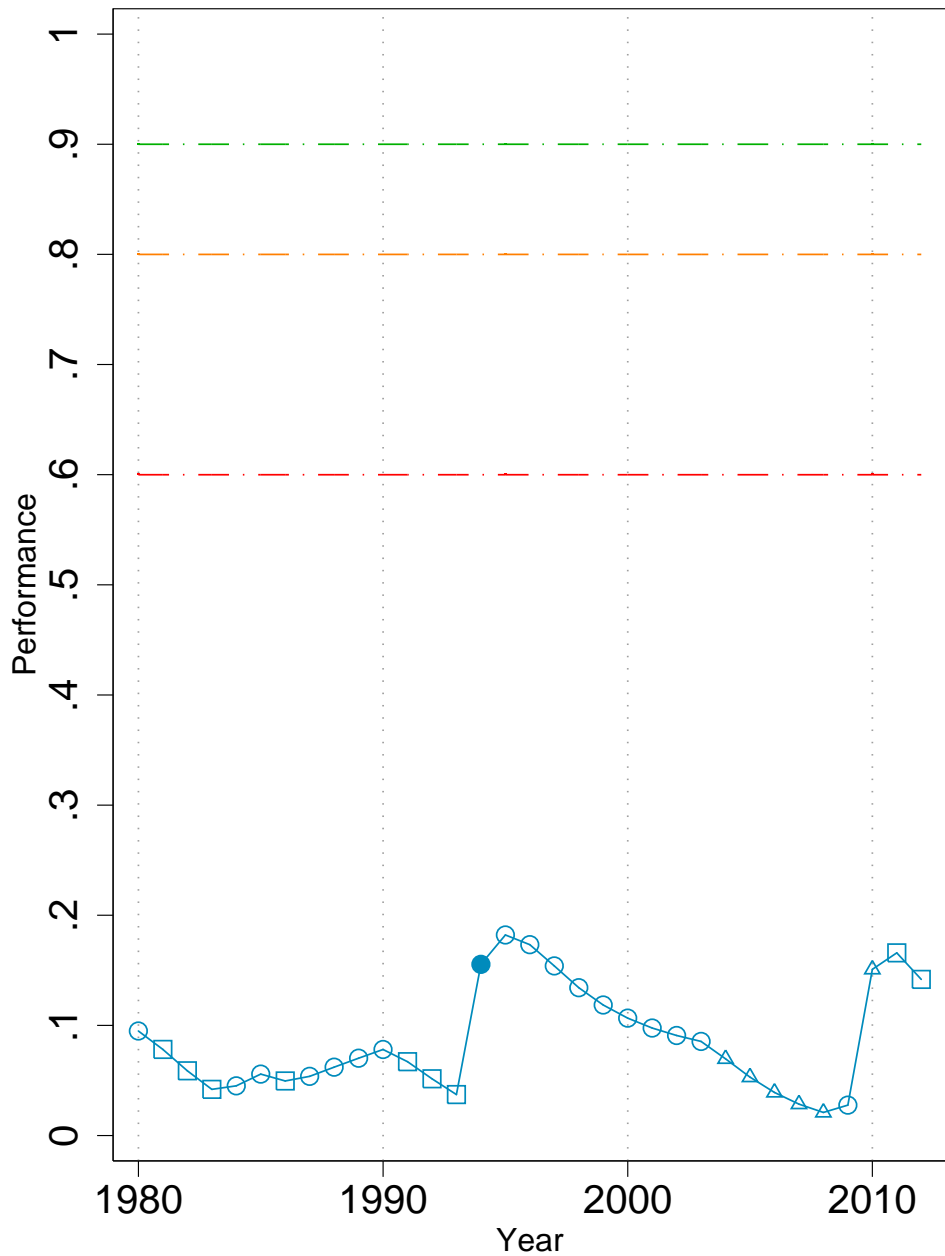

### Completeness

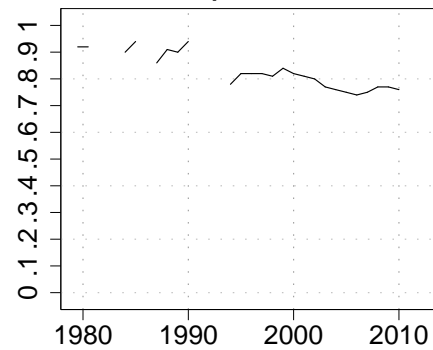

### Garbage Coding

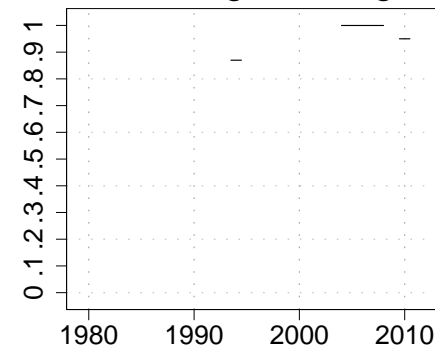

### Length of Cause List

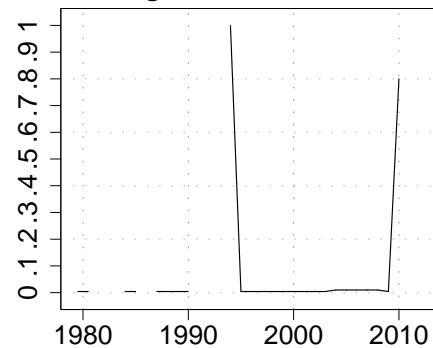

### Age/Sex Unspecified

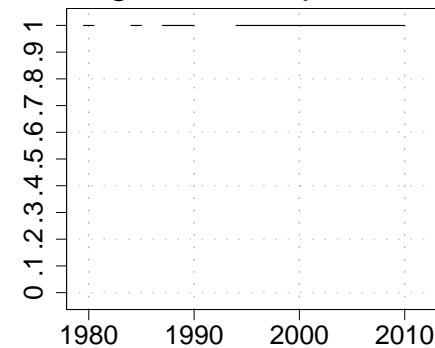

### Medically Impossible Diagnoses

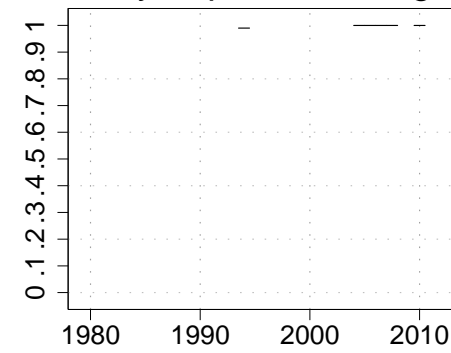

Indicators on their Original (Unweighted) Scale  
and Subtracted from One Where Necessary so Higher Scores are Preferable to Lower

# Montenegro

## VS Performance Index

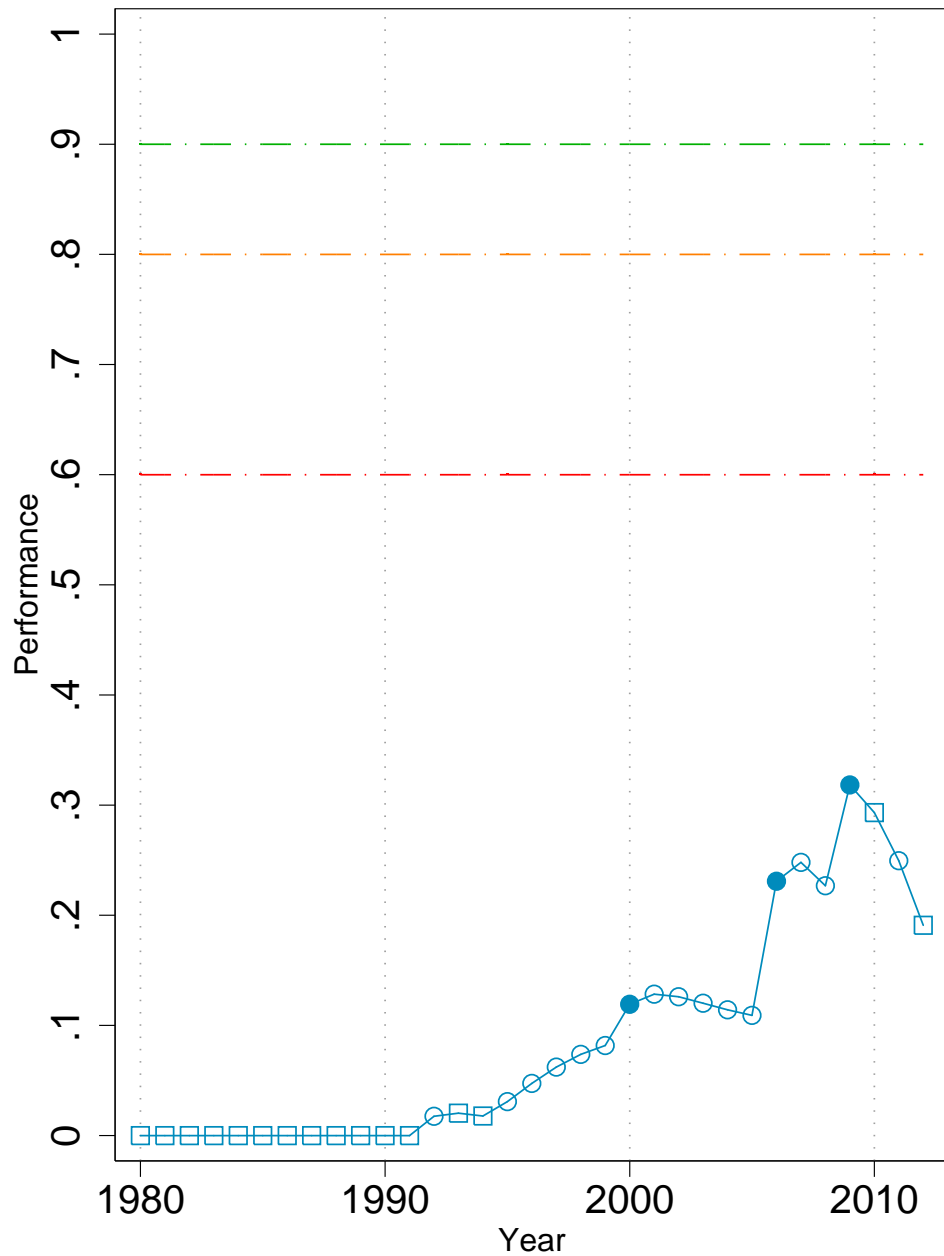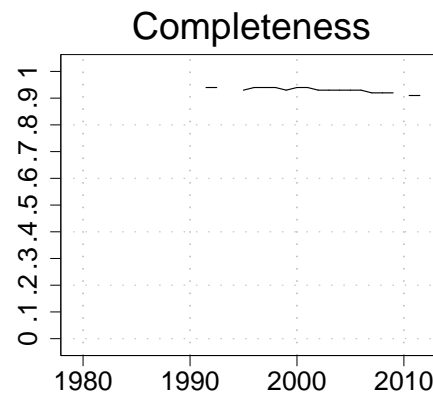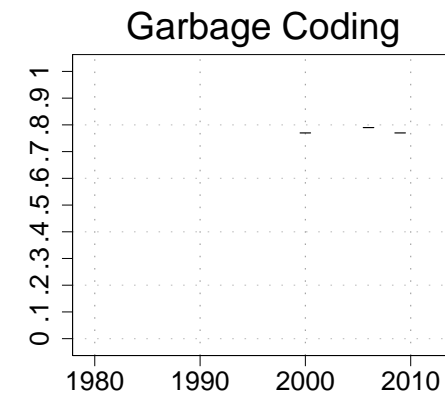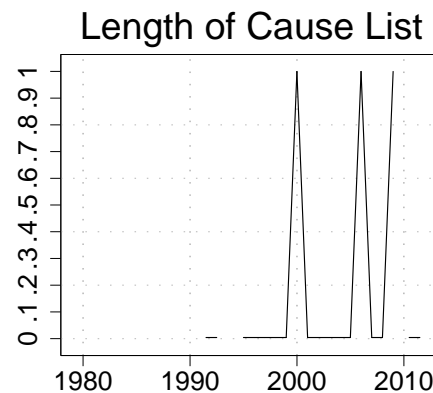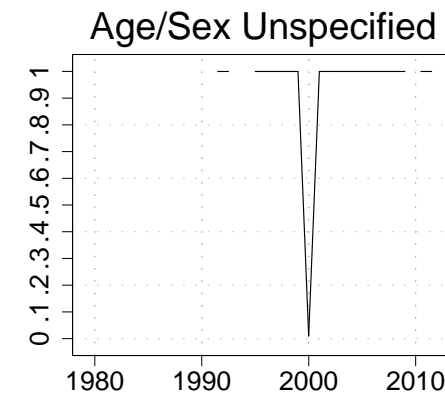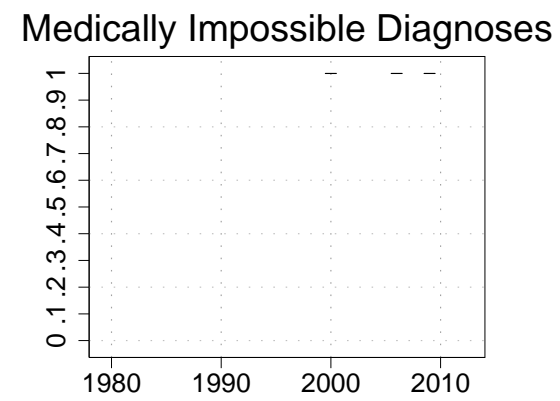

Indicators on their Original (Unweighted) Scale and Subtracted from One Where Necessary so Higher Scores are Preferable to Lower

# Morocco

## VS Performance Index

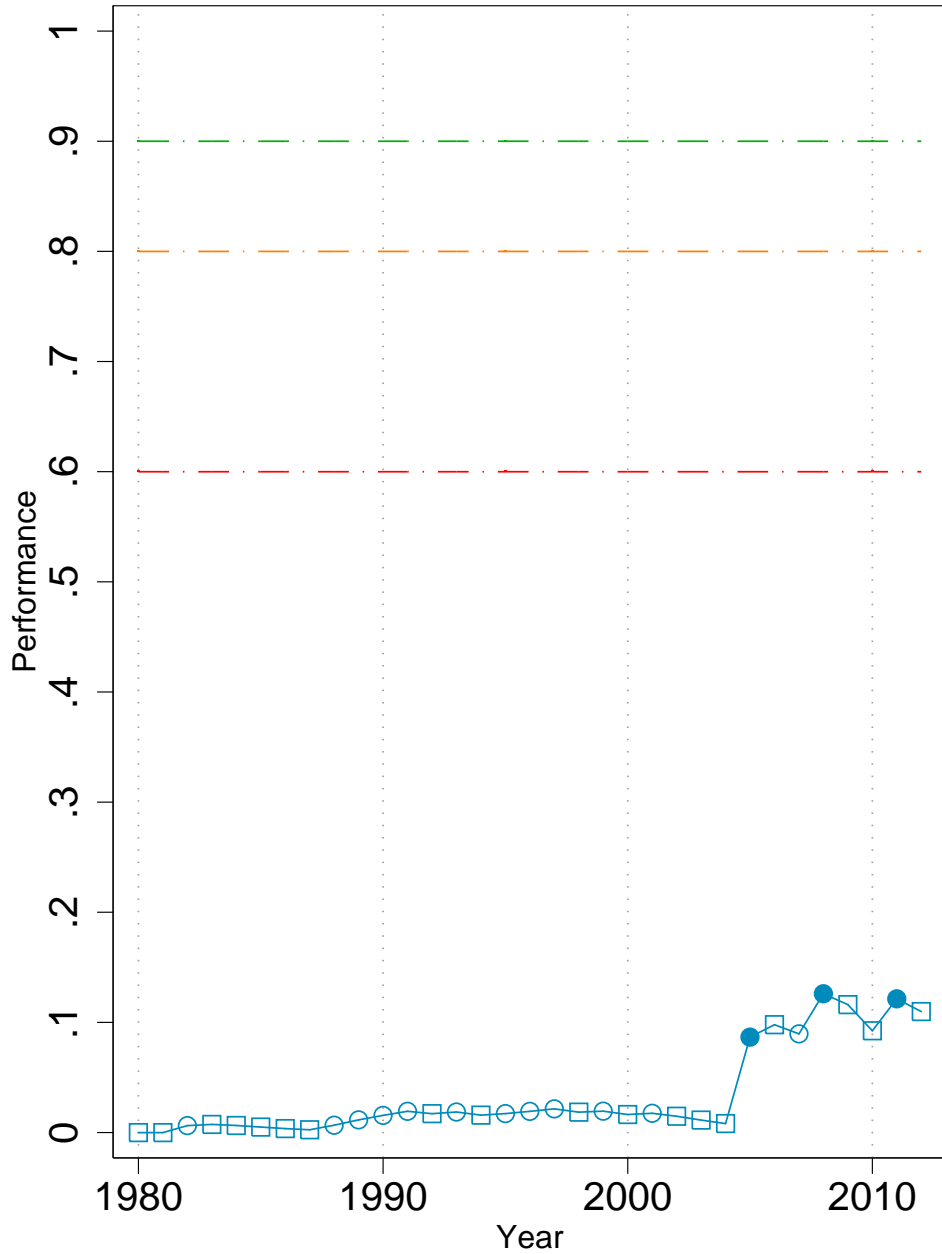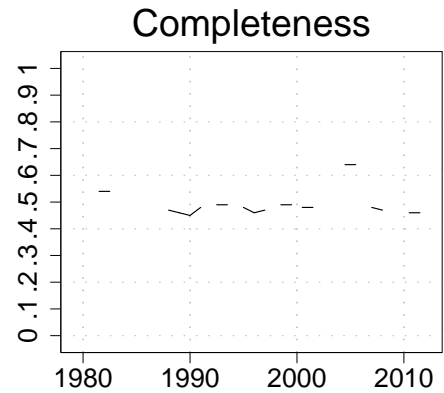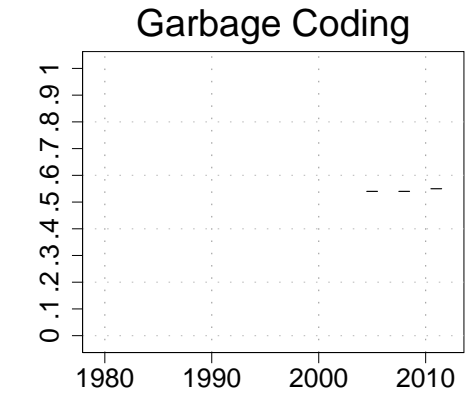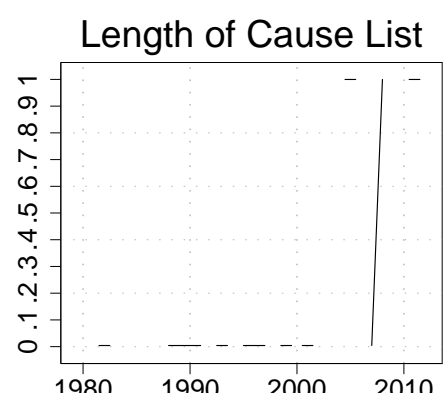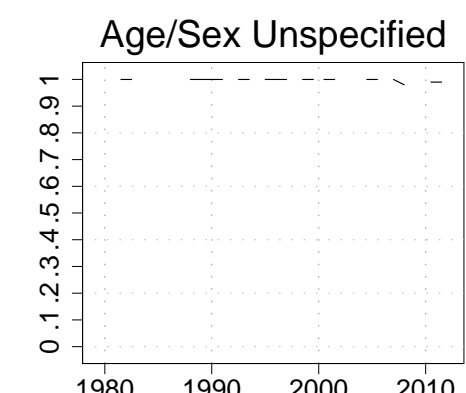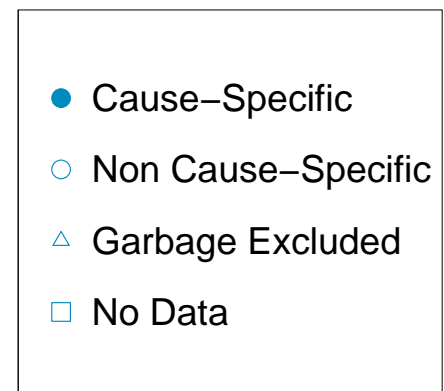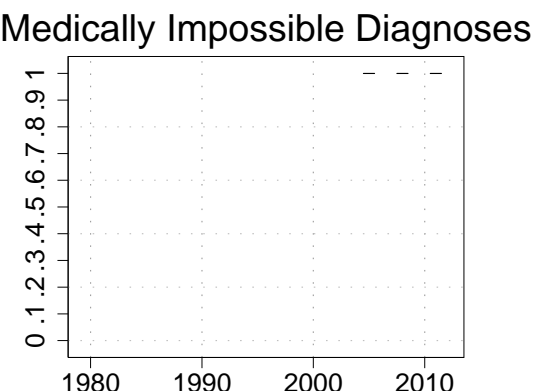

Indicators on their Original (Unweighted) Scale and Subtracted from One Where Necessary so Higher Scores are Preferable to Lower

# Mozambique

## VS Performance Index

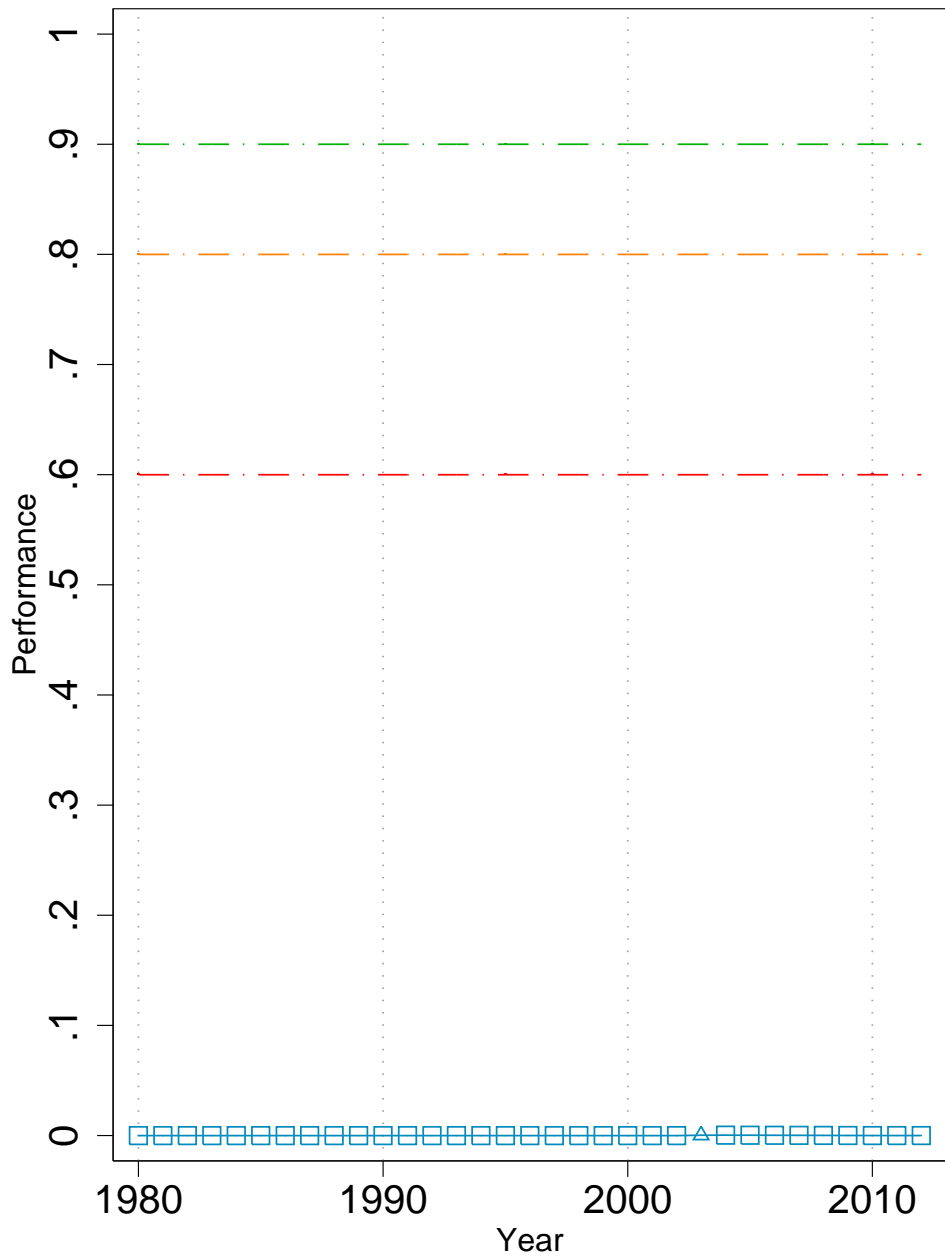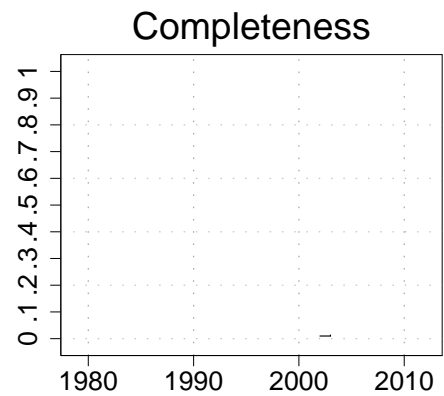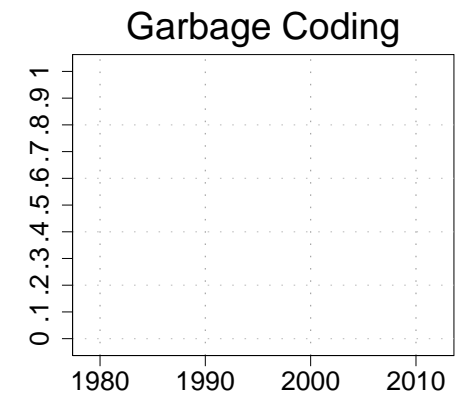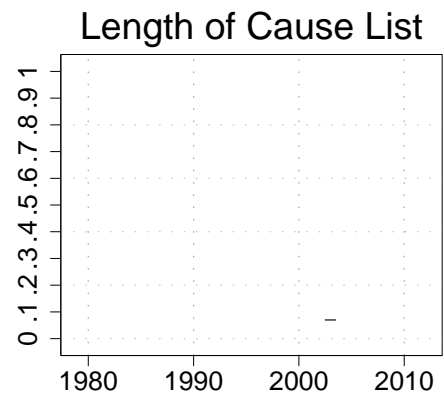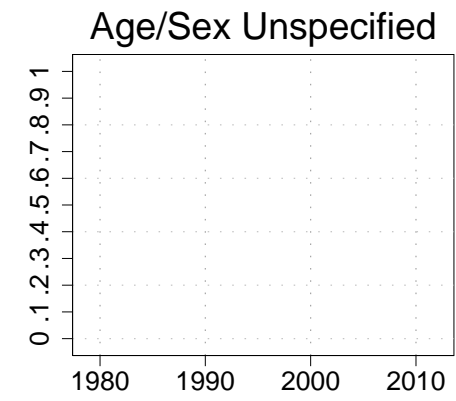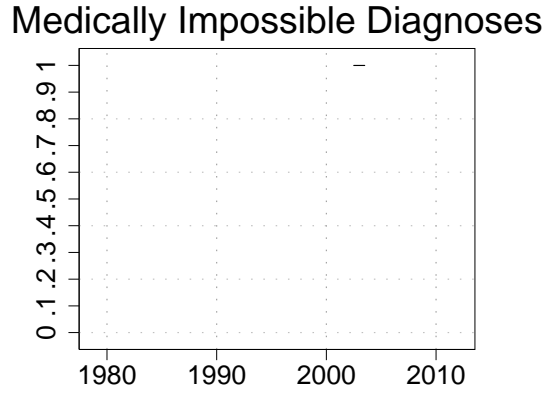

Indicators on their Original (Unweighted) Scale and Subtracted from One Where Necessary so Higher Scores are Preferable to Lower

# Myanmar

## VS Performance Index

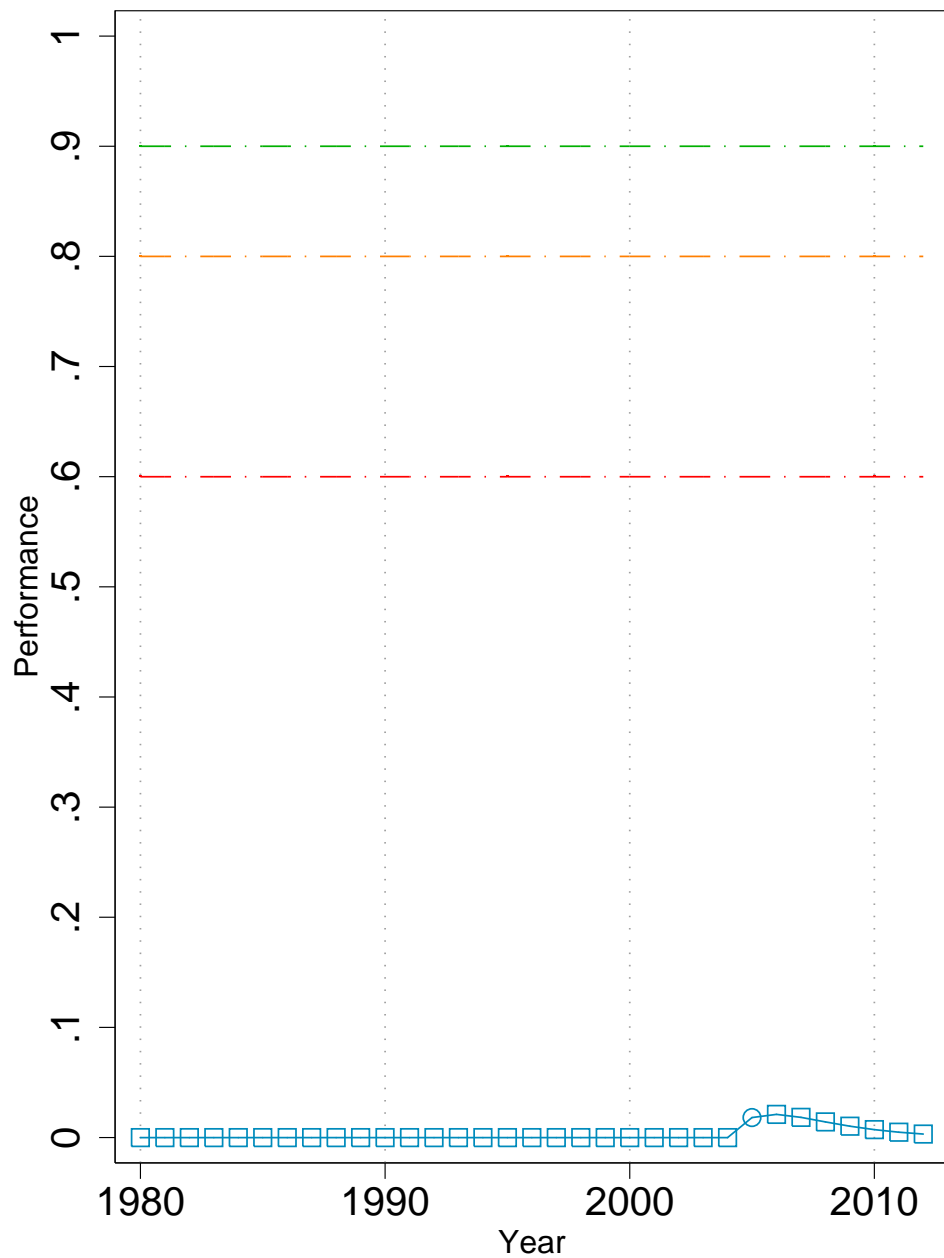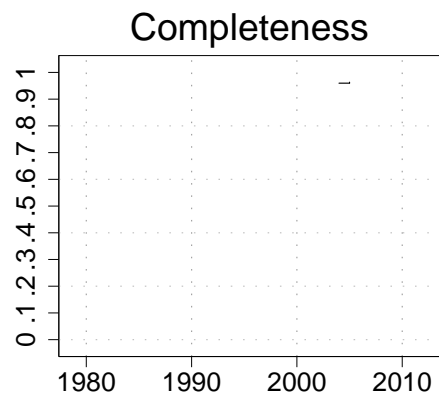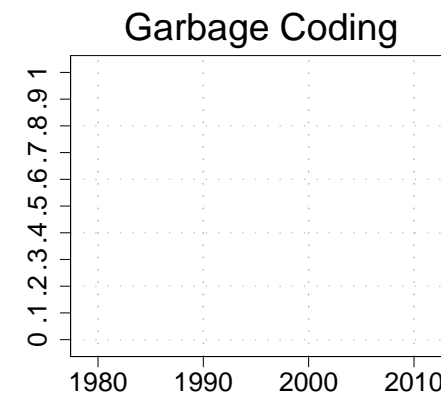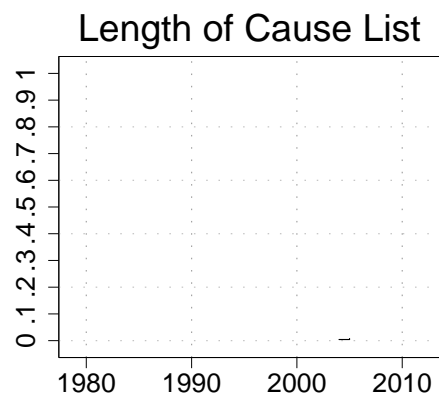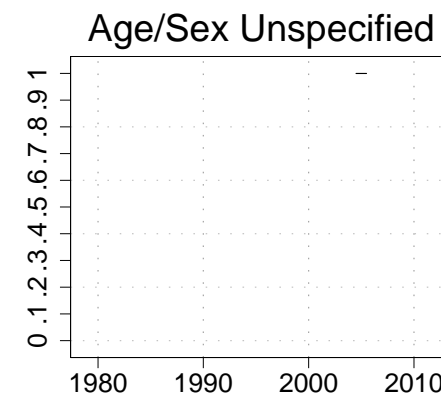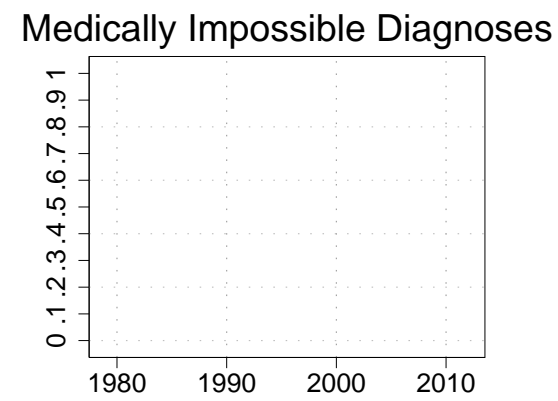

Indicators on their Original (Unweighted) Scale and Subtracted from One Where Necessary so Higher Scores are Preferable to Lower



# Netherlands

## VS Performance Index

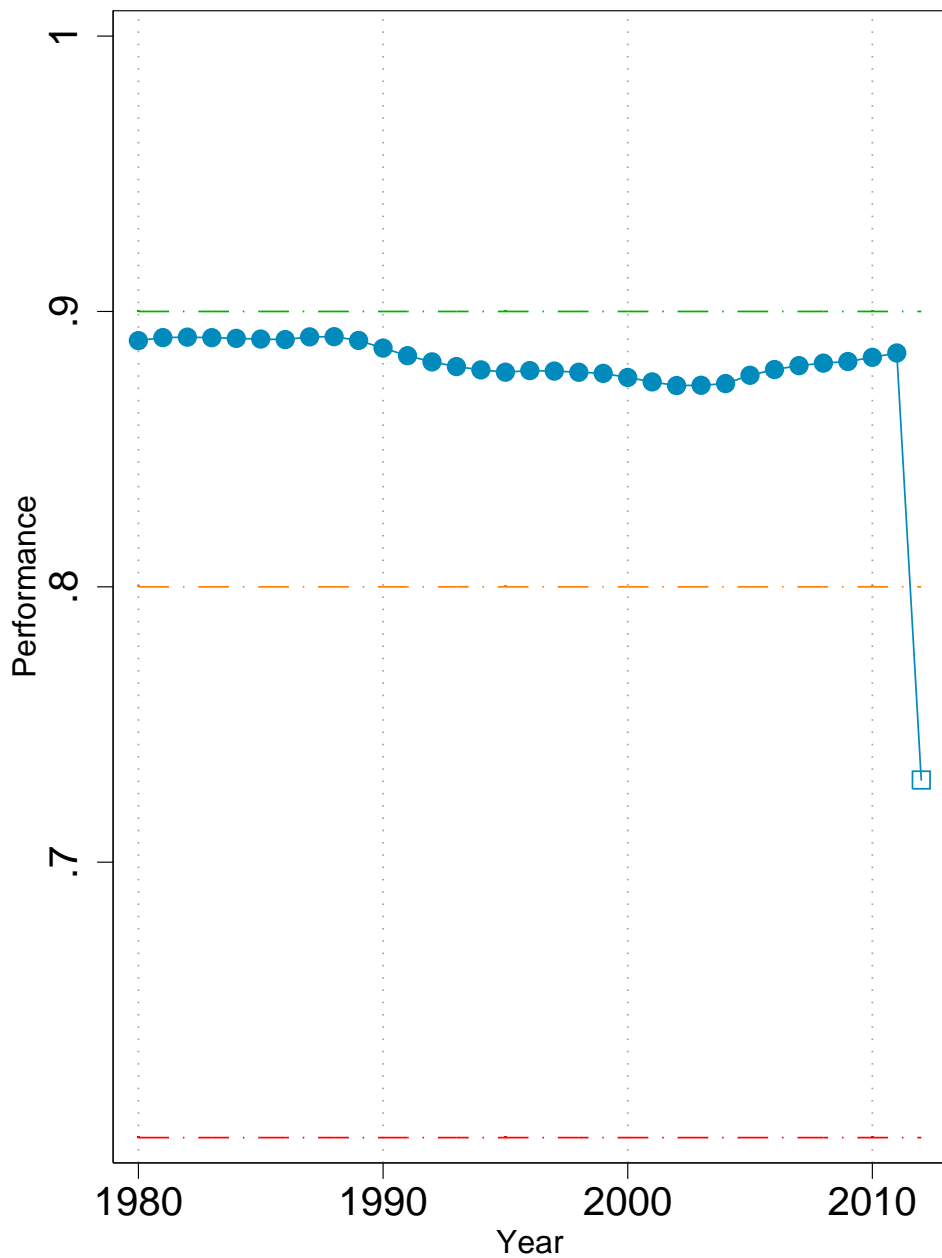

Completeness

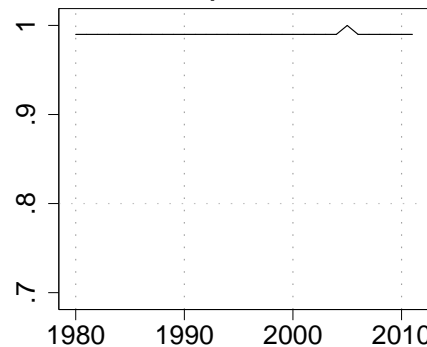

Garbage Coding

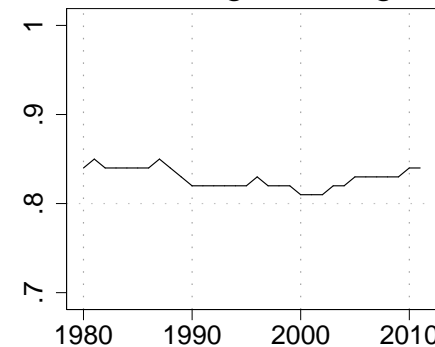

Length of Cause List

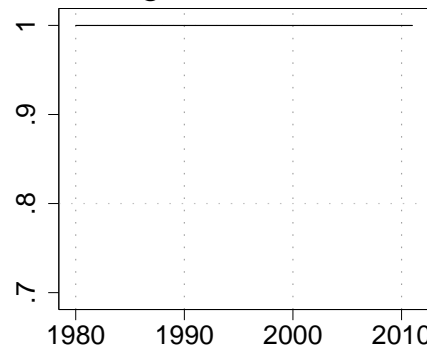

Age/Sex Unspecified

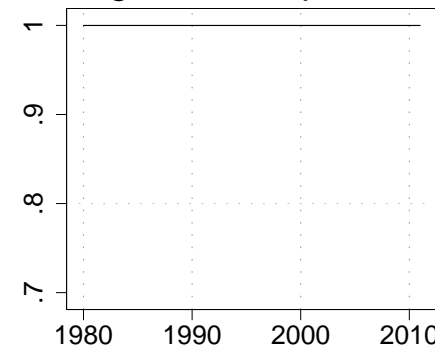

Medically Impossible Diagnoses

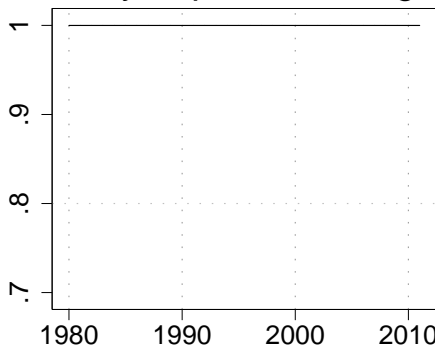

Indicators on their Original (Unweighted) Scale and Subtracted from One Where Necessary so Higher Scores are Preferable to Lower

# New Zealand VS Performance Index

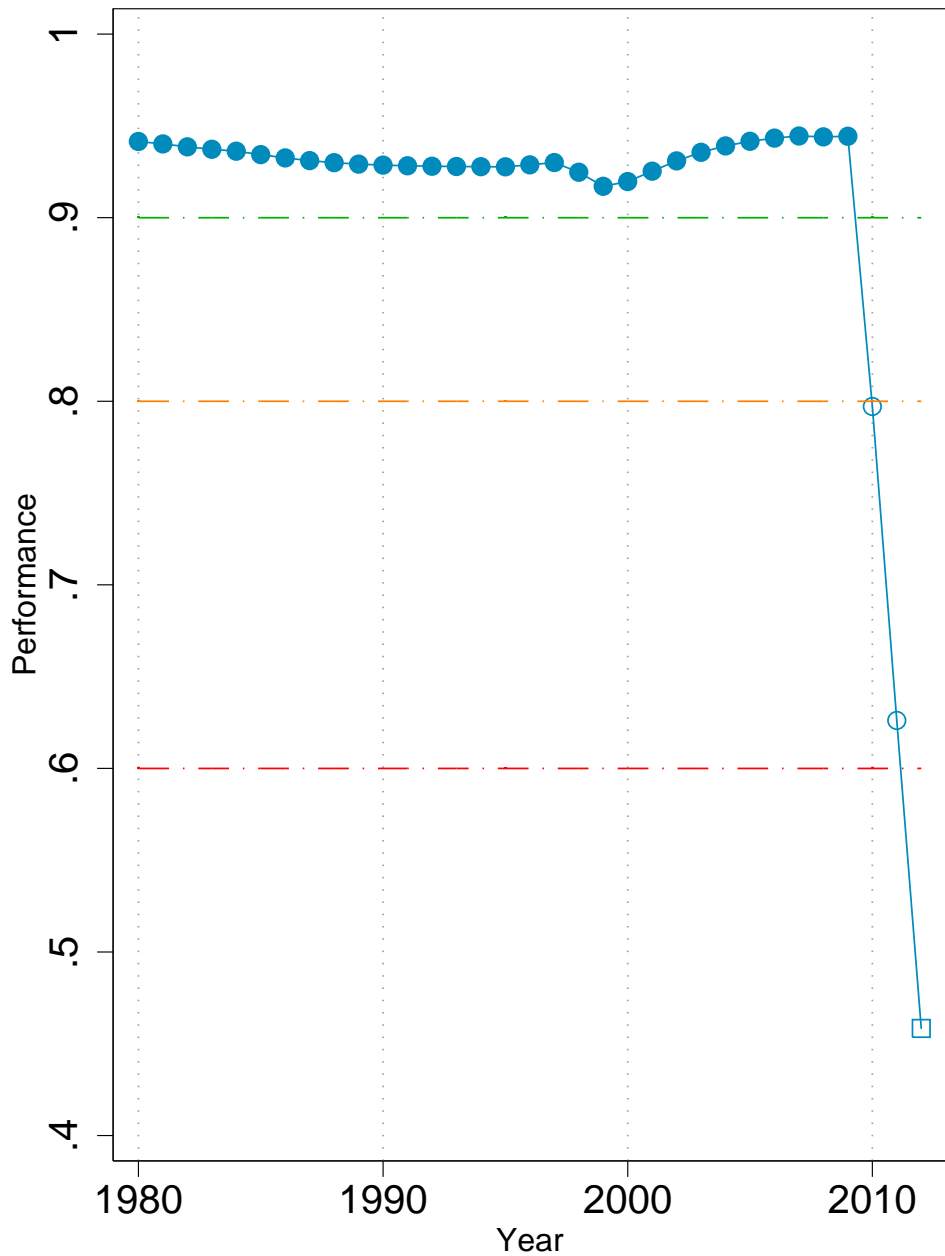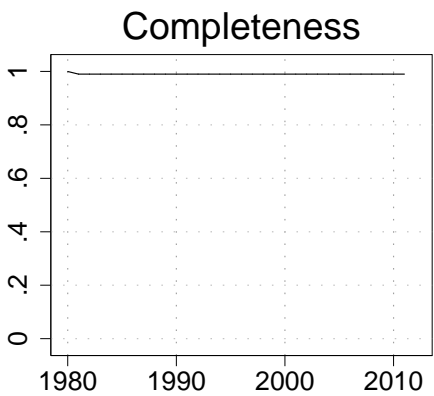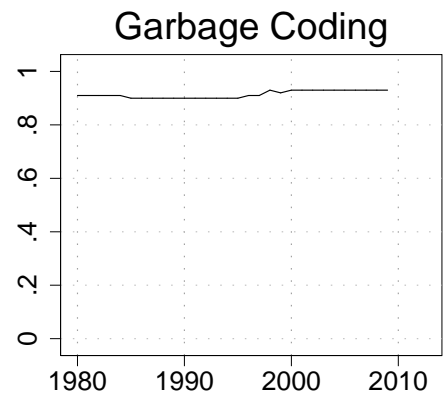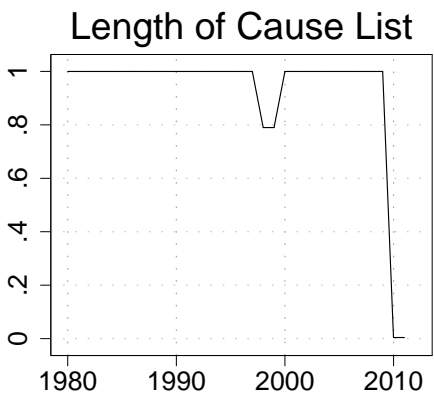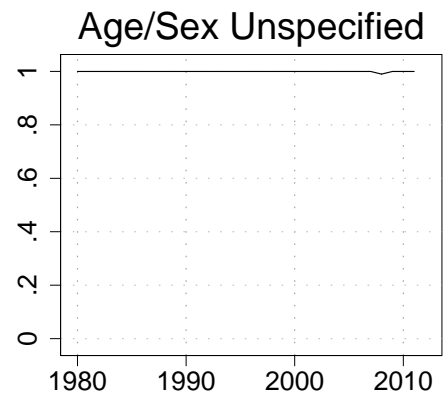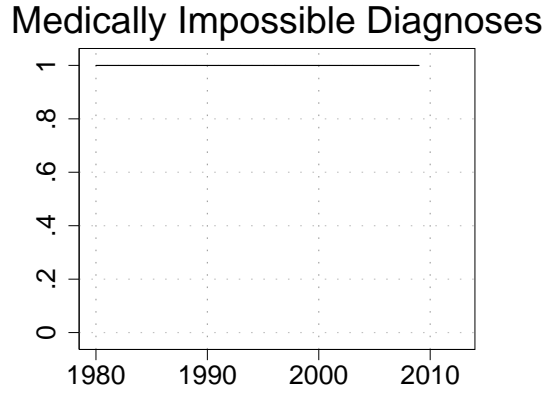

Indicators on their Original (Unweighted) Scale and Subtracted from One Where Necessary so Higher Scores are Preferable to Lower

# Nicaragua

## VS Performance Index

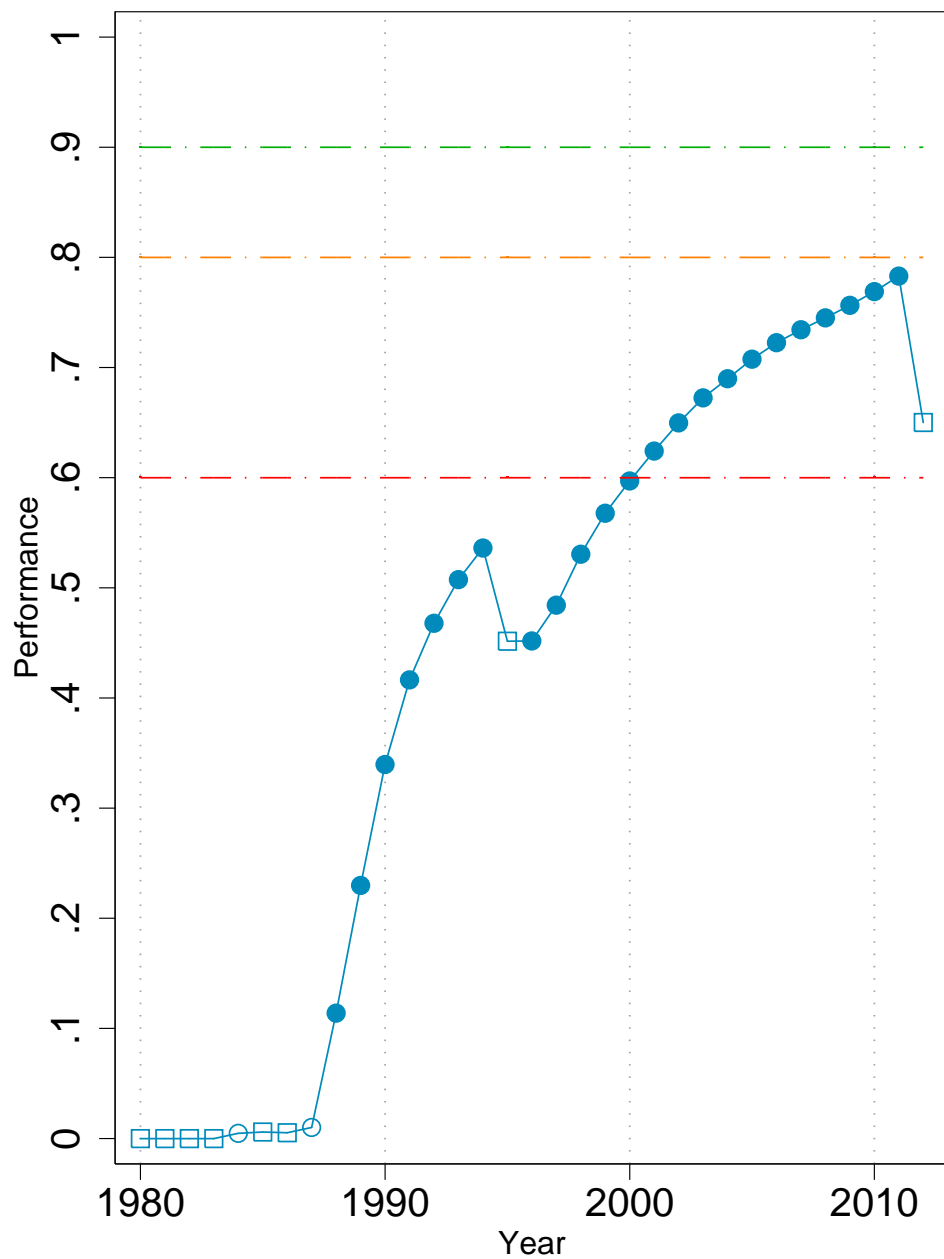

### Completeness

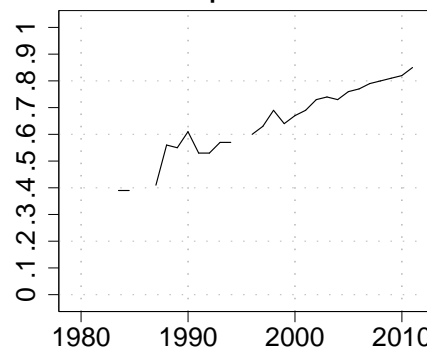

### Garbage Coding

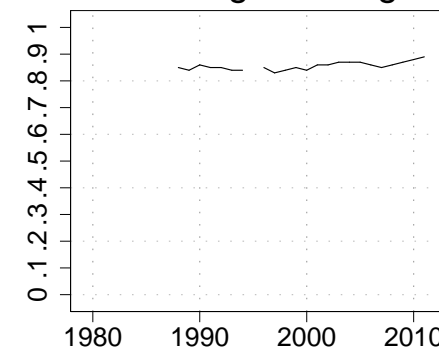

### Length of Cause List

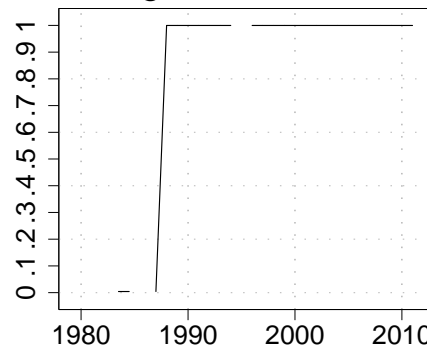

### Age/Sex Unspecified

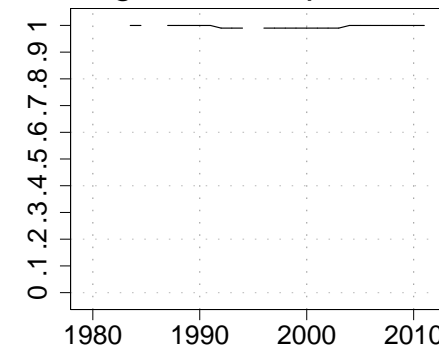

### Medically Impossible Diagnoses

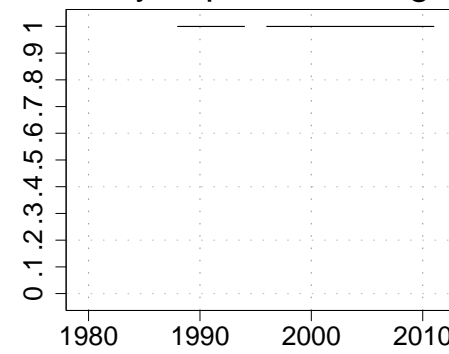

Indicators on their Original (Unweighted) Scale and Subtracted from One Where Necessary so Higher Scores are Preferable to Lower

# Nigeria

## VS Performance Index

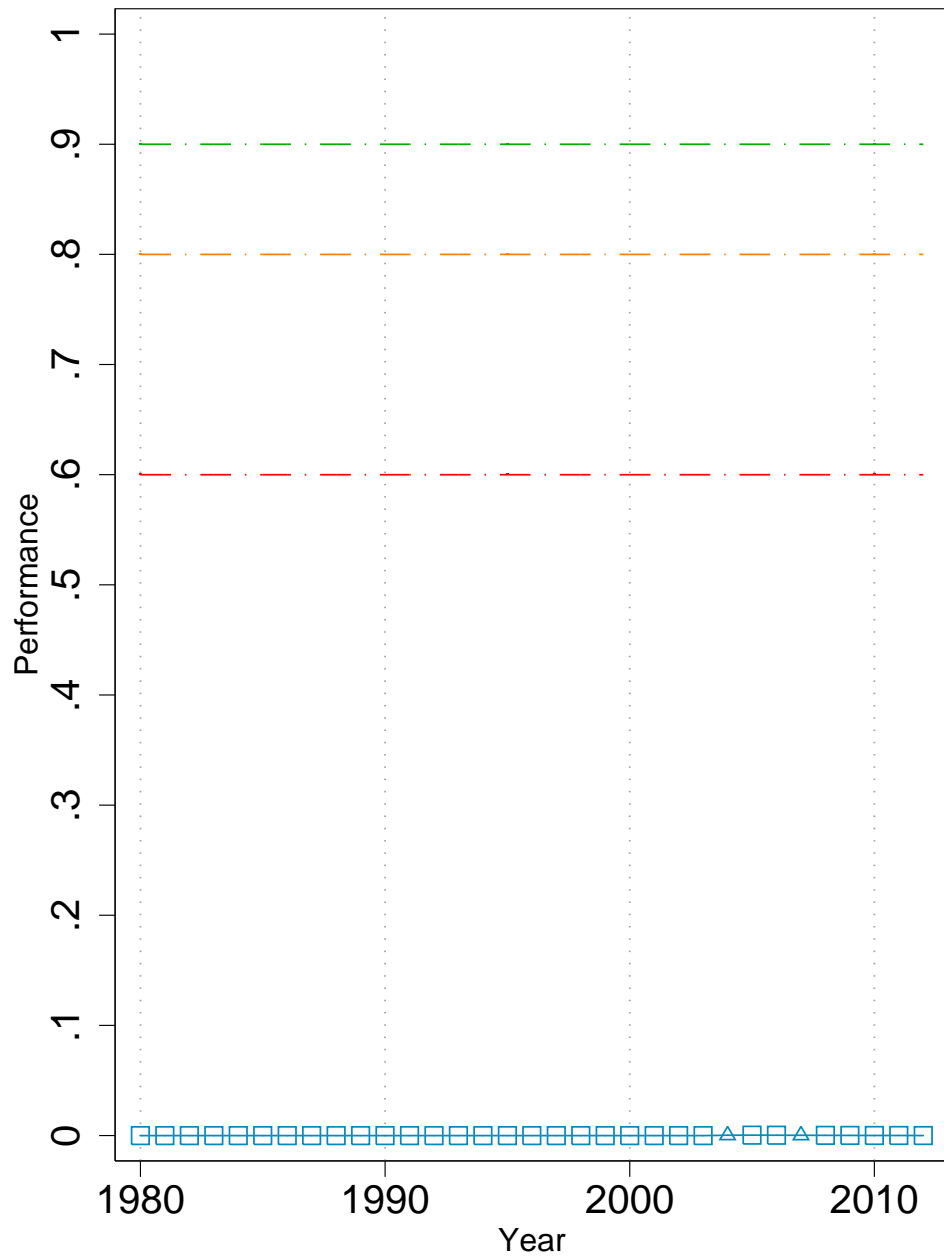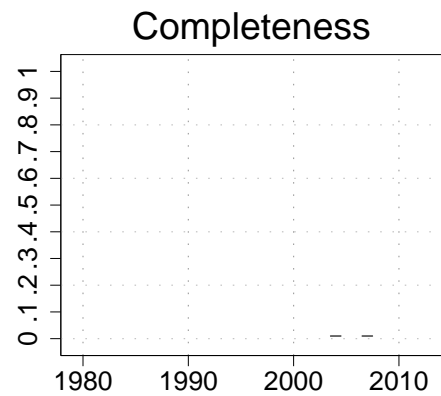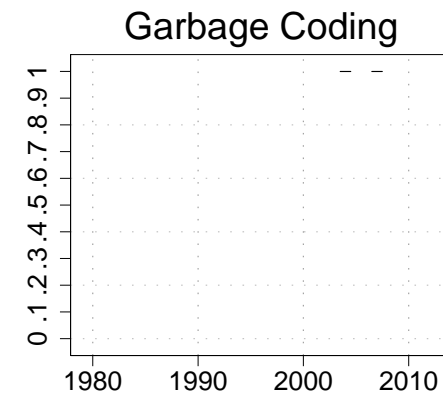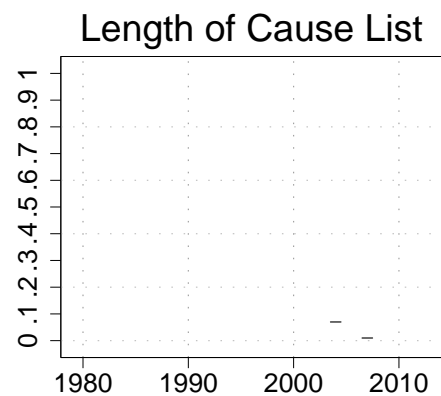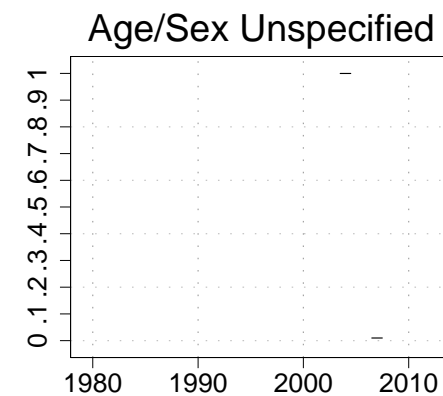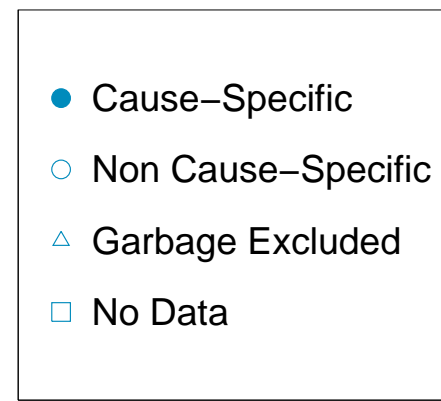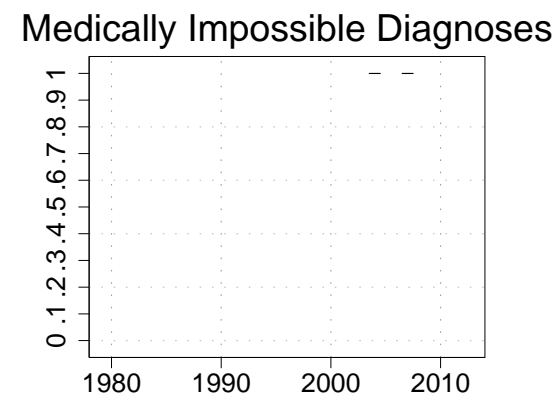

Indicators on their Original (Unweighted) Scale and Subtracted from One Where Necessary so Higher Scores are Preferable to Lower

# Norway

## VS Performance Index

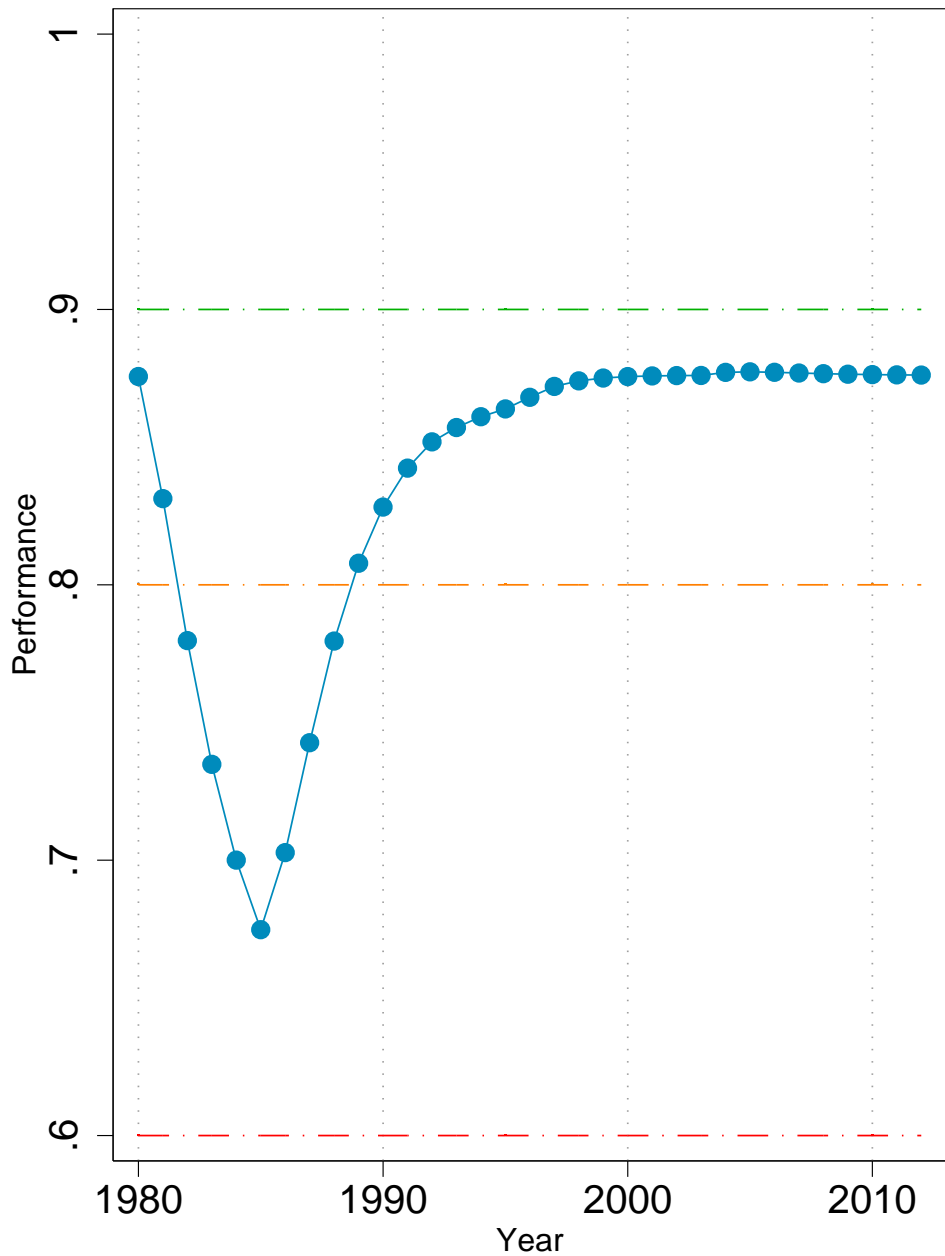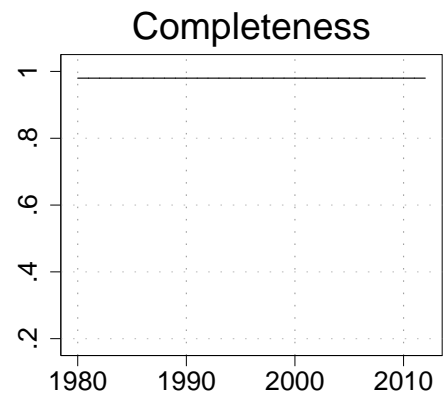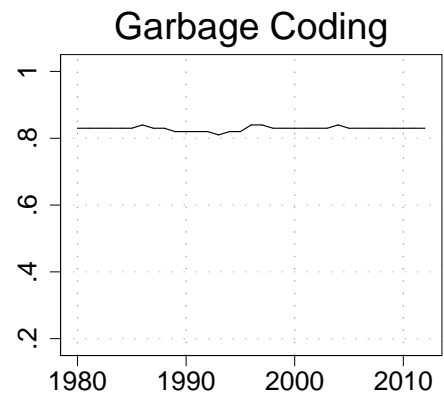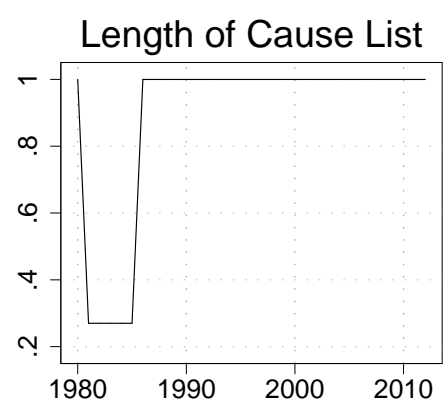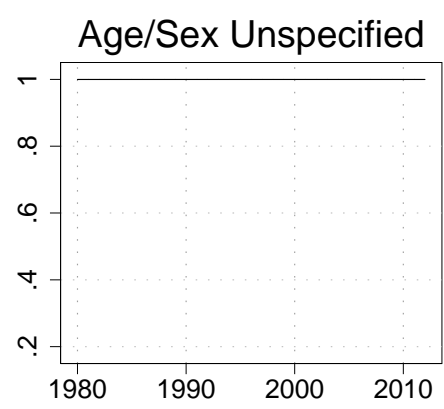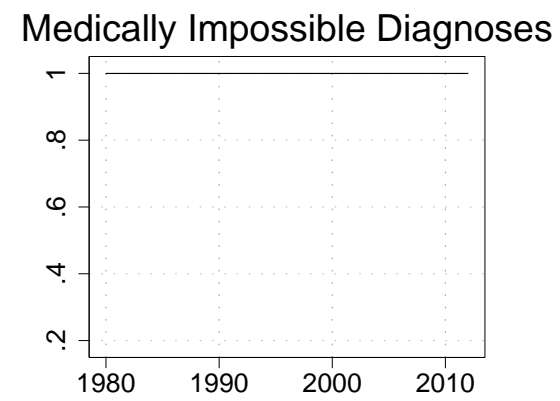

Indicators on their Original (Unweighted) Scale and Subtracted from One Where Necessary so Higher Scores are Preferable to Lower

# Occupied Palestinian Territory VS Performance Index

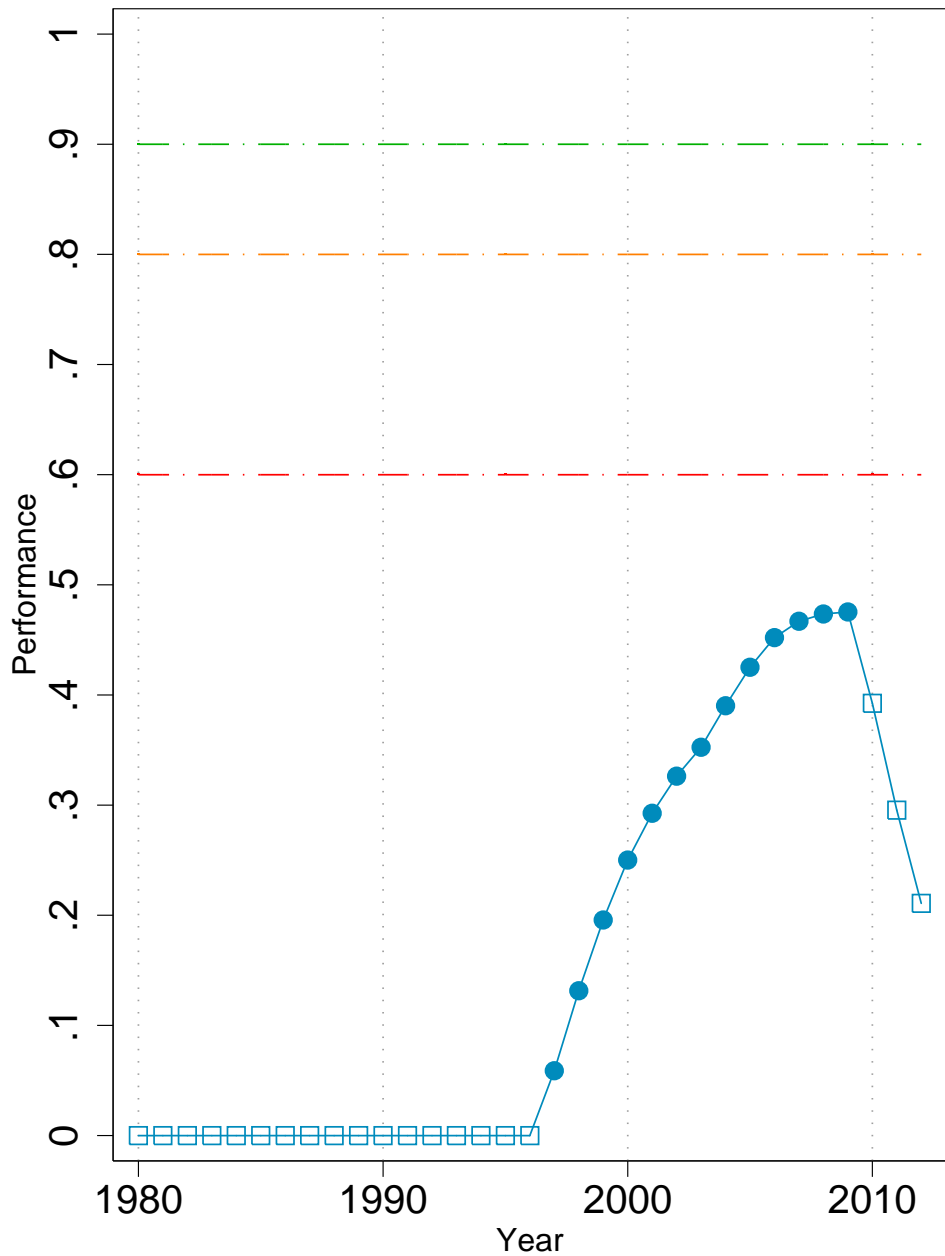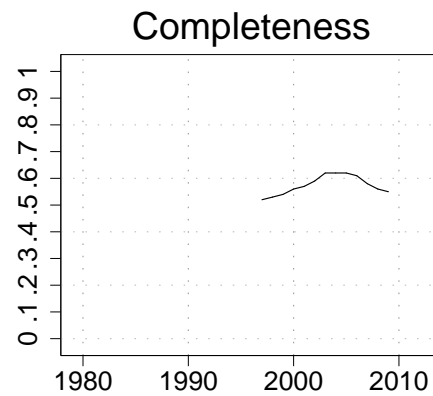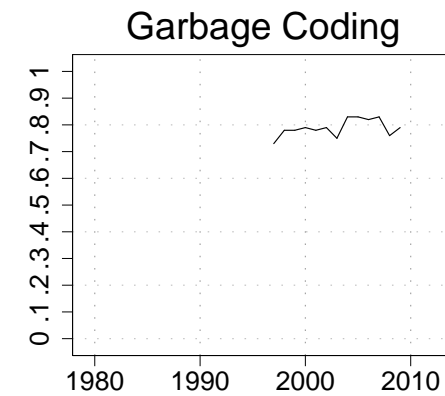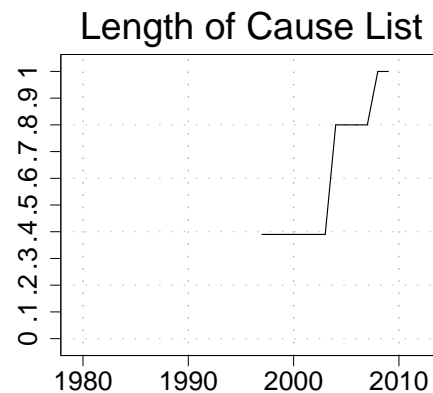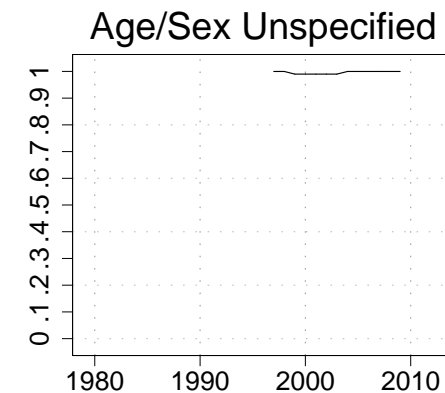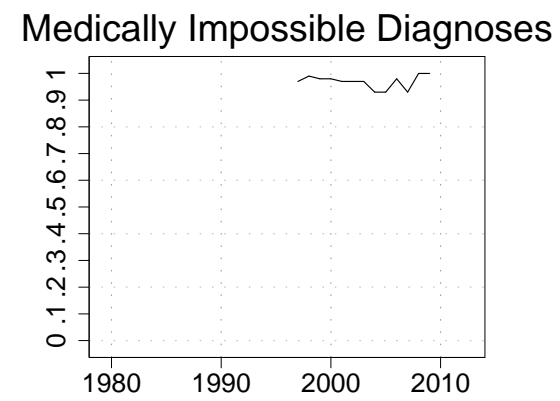

Indicators on their Original (Unweighted) Scale  
and Subtracted from One Where Necessary so Higher Scores are Preferable to Lower

# Oman

## VS Performance Index

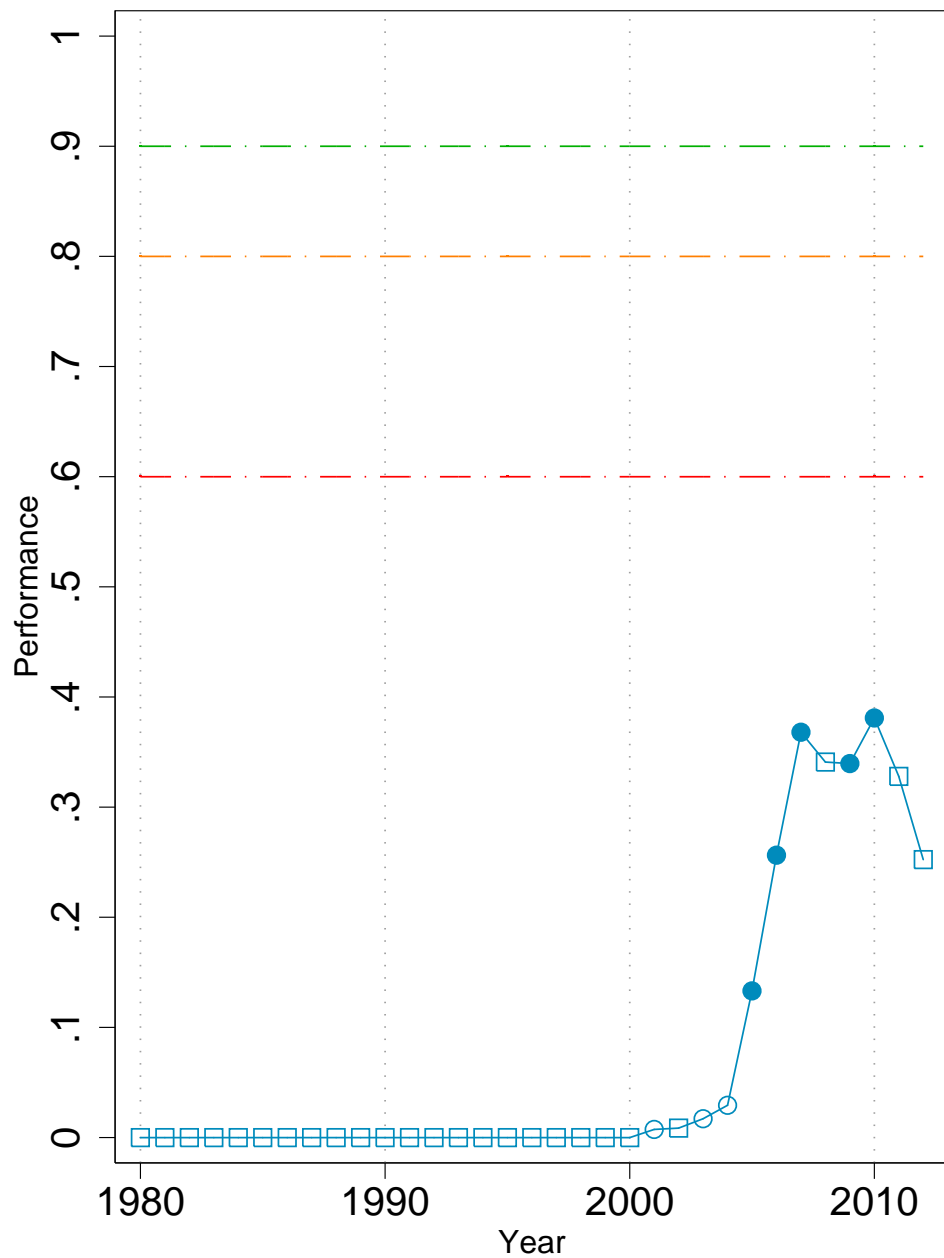

### Completeness

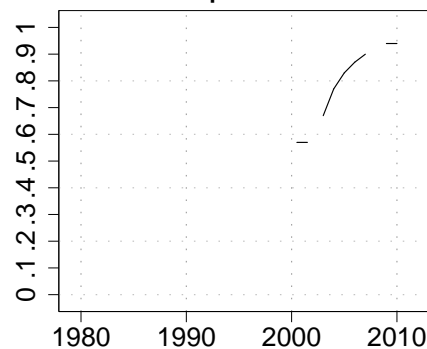

### Garbage Coding

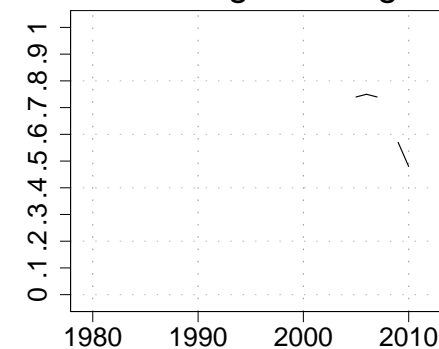

### Length of Cause List

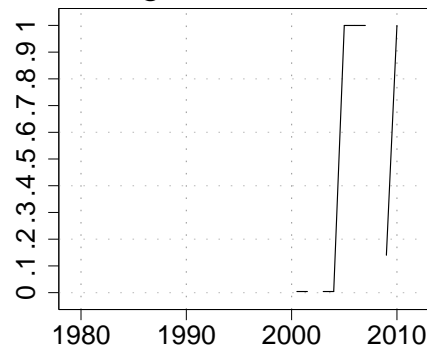

### Age/Sex Unspecified

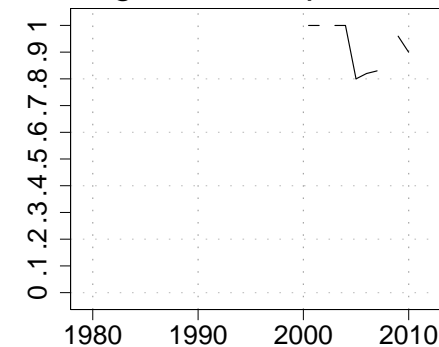

### Medically Impossible Diagnoses

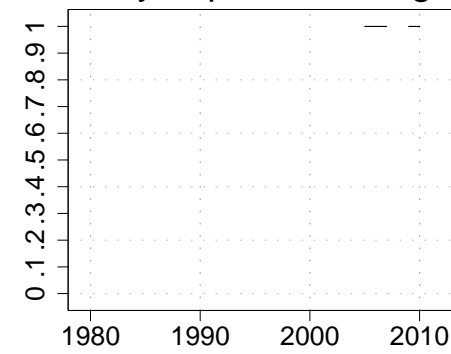

Indicators on their Original (Unweighted) Scale and Subtracted from One Where Necessary so Higher Scores are Preferable to Lower

# Pakistan

## VS Performance Index

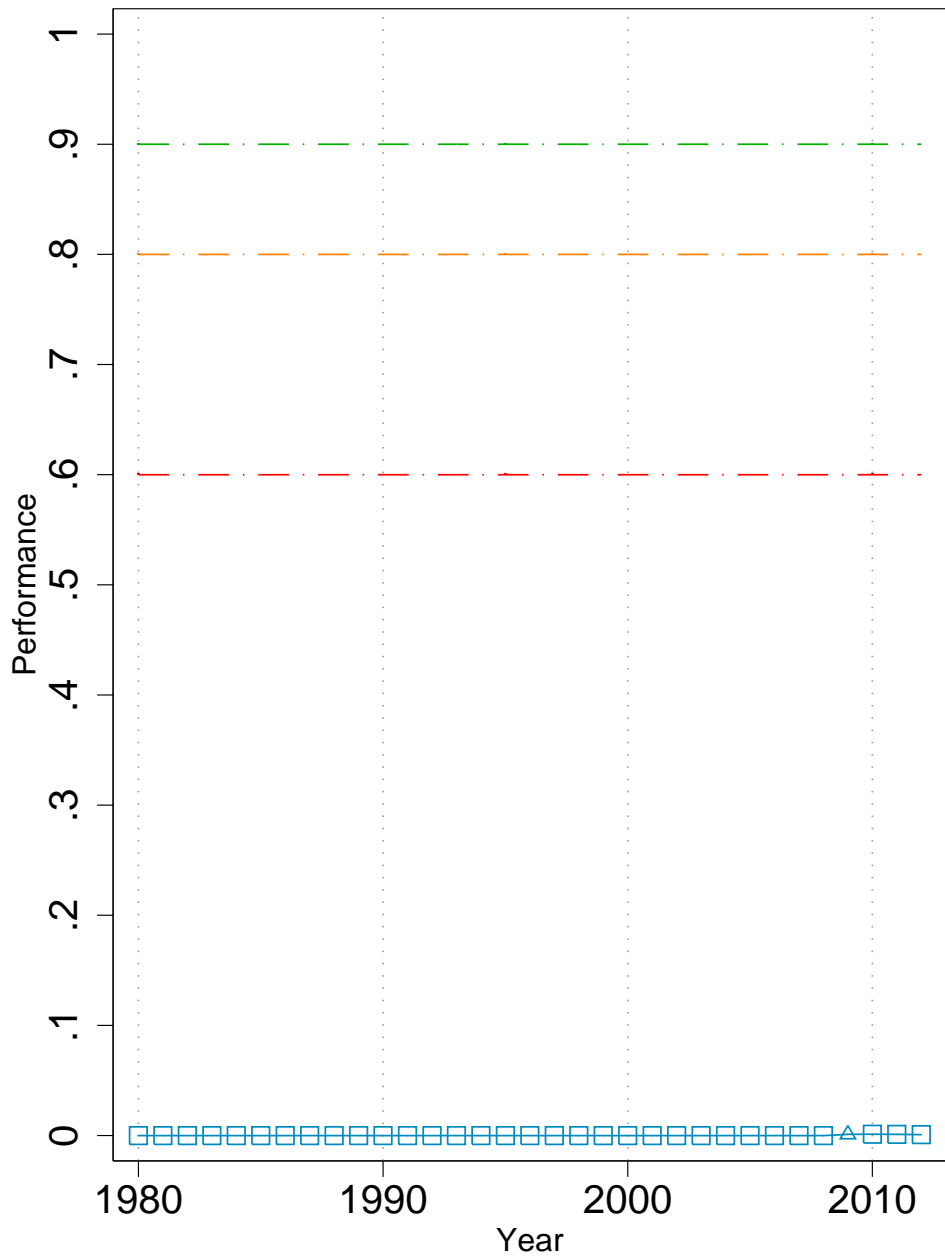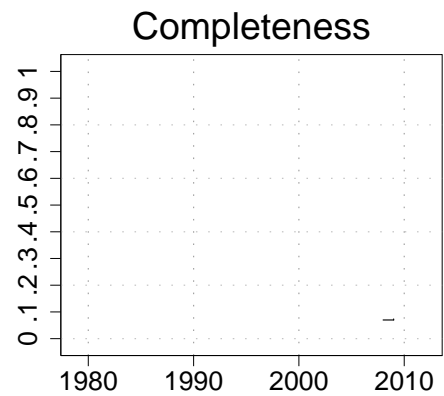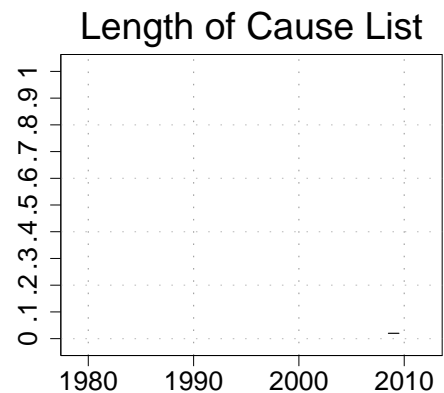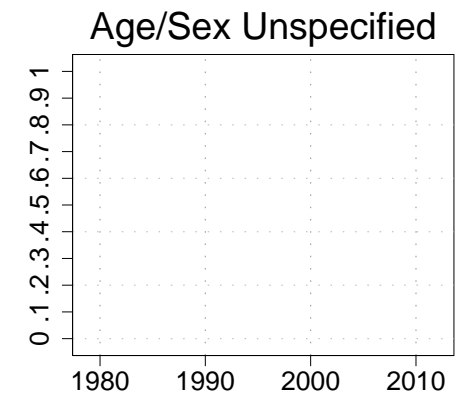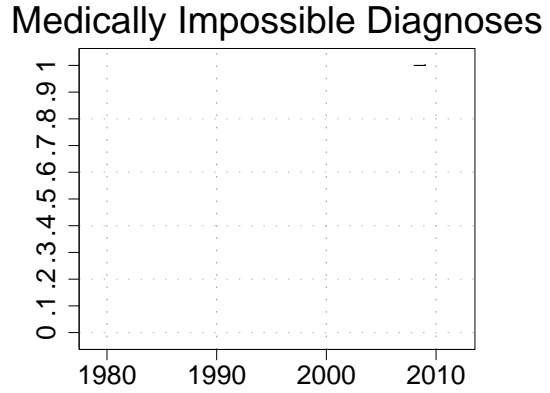

Indicators on their Original (Unweighted) Scale and Subtracted from One Where Necessary so Higher Scores are Preferable to Lower



# Panama

## VS Performance Index

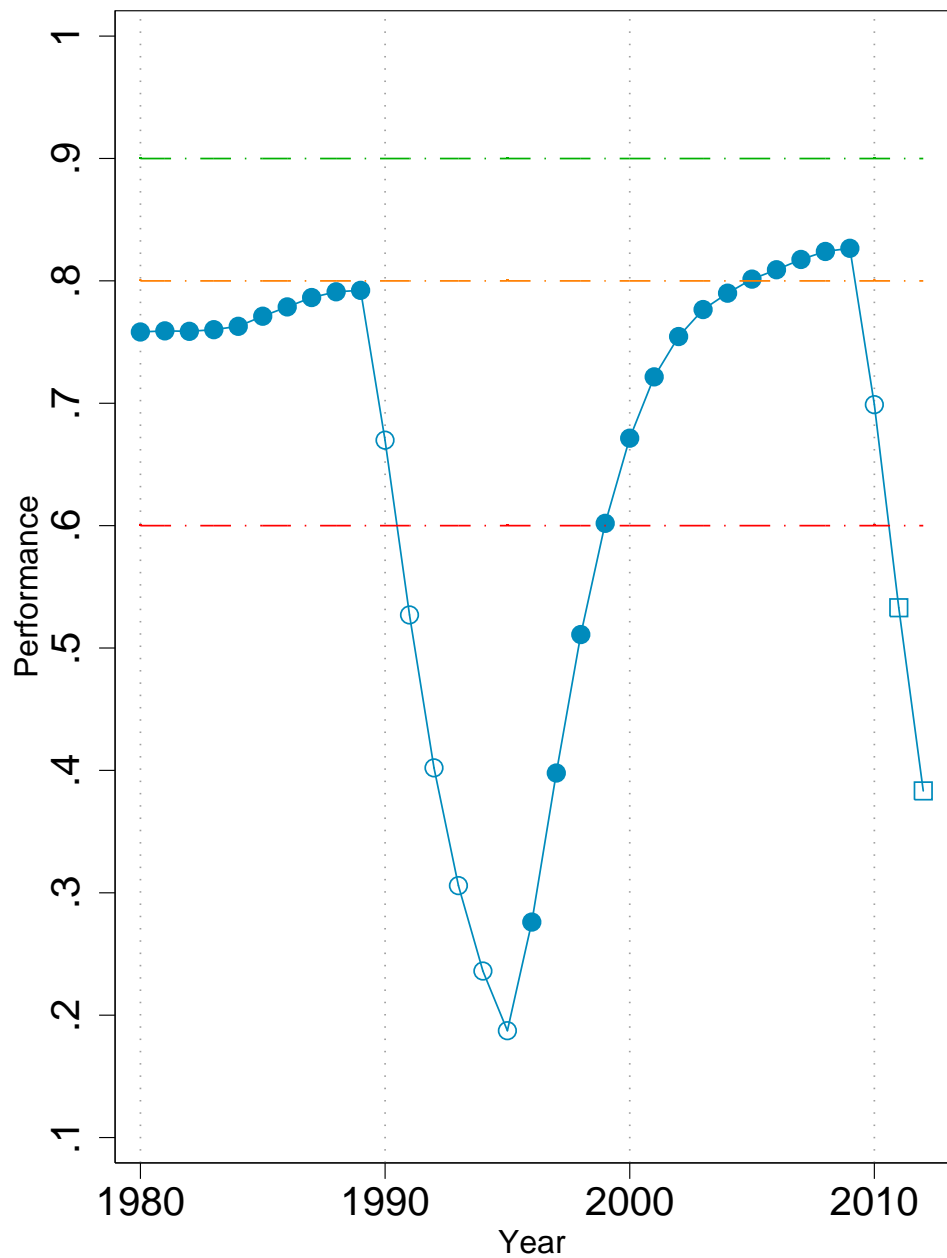

### Completeness

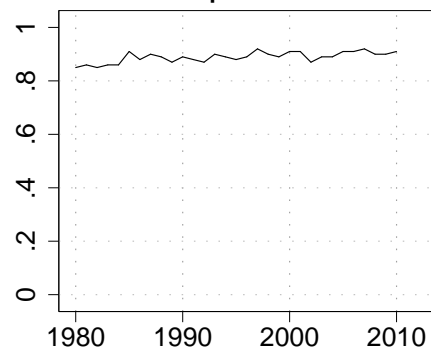

### Garbage Coding

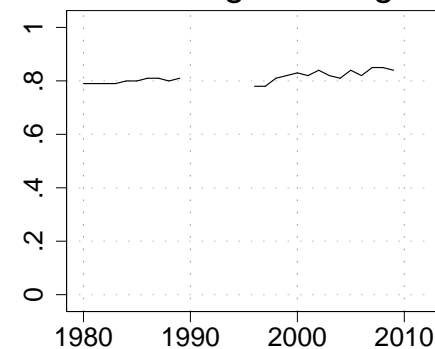

### Length of Cause List

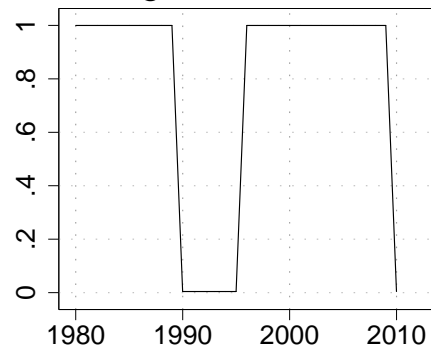

### Age/Sex Unspecified

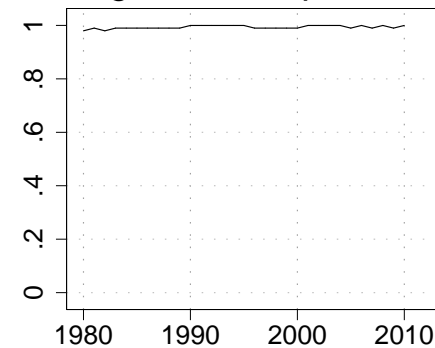

### Medically Impossible Diagnoses

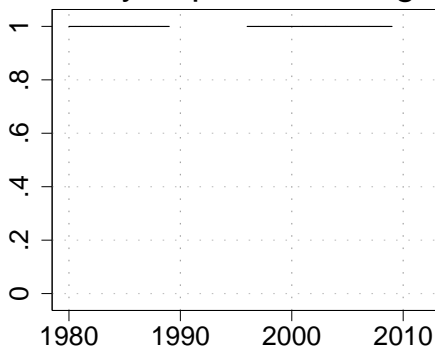

Indicators on their Original (Unweighted) Scale and Subtracted from One Where Necessary so Higher Scores are Preferable to Lower

# Papua New Guinea VS Performance Index

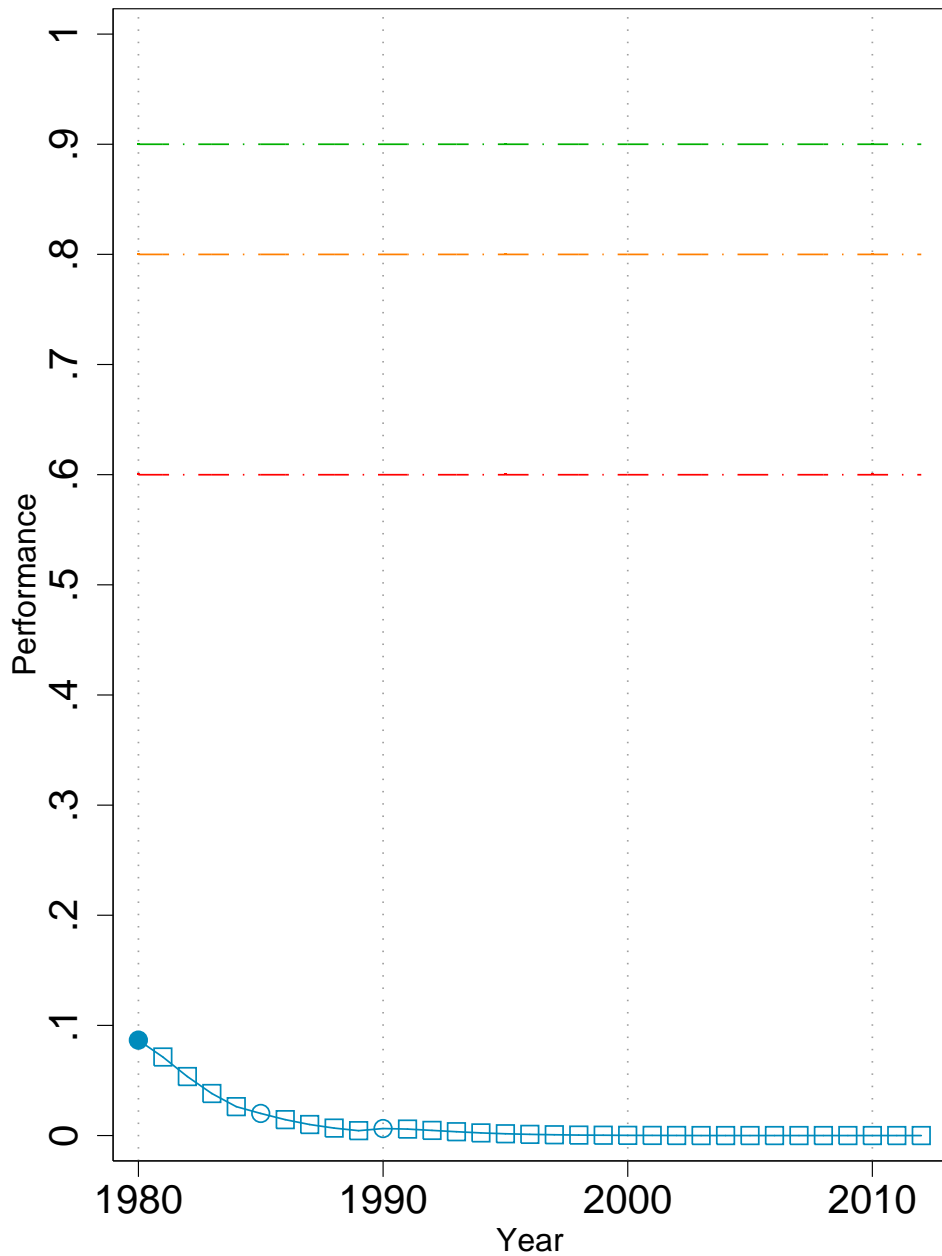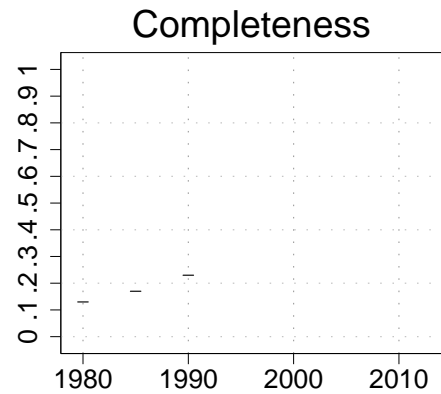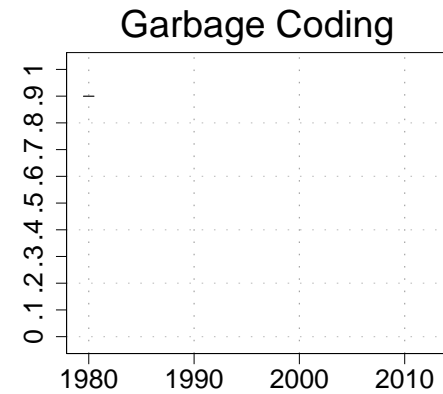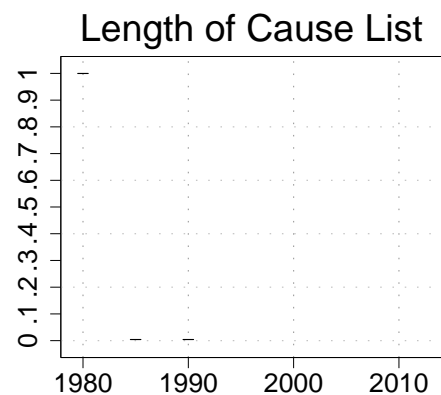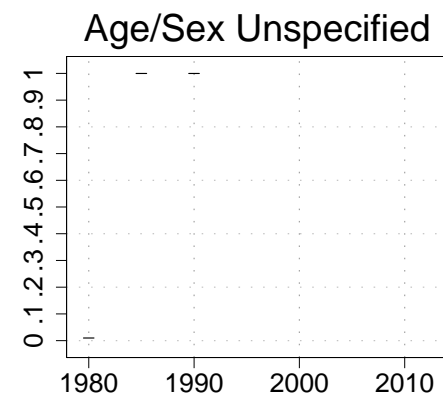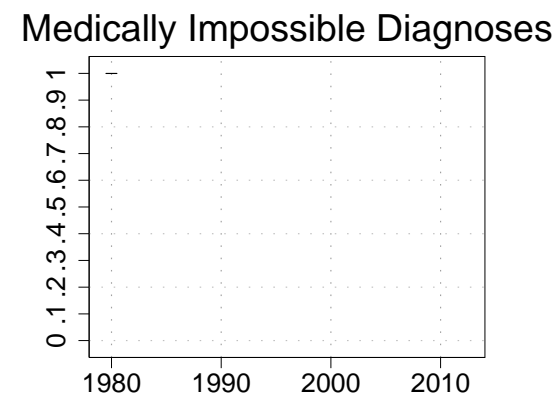

Indicators on their Original (Unweighted) Scale and Subtracted from One Where Necessary so Higher Scores are Preferable to Lower

# Paraguay

## VS Performance Index

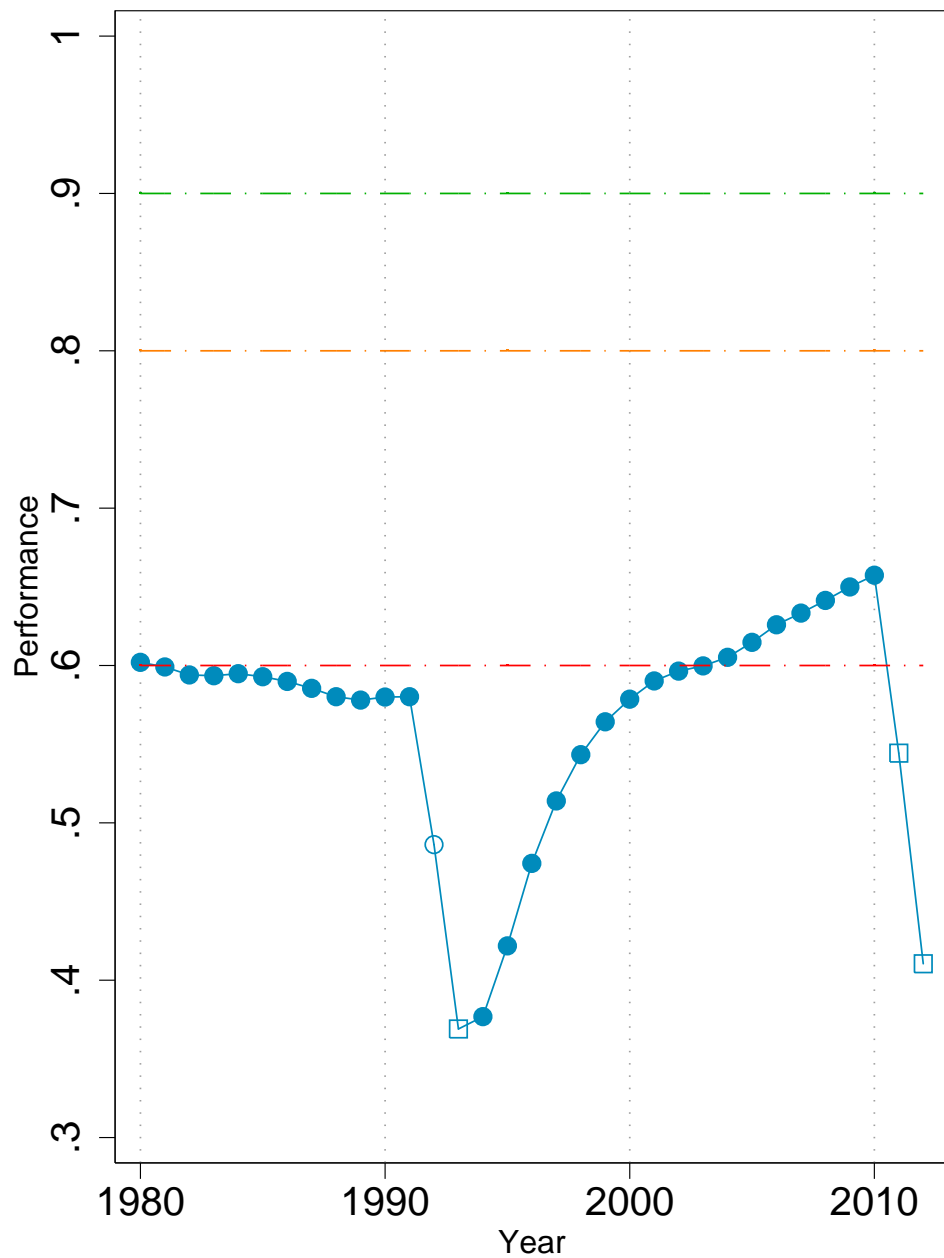

### Completeness

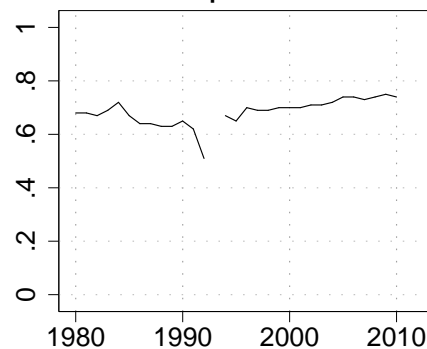

### Garbage Coding

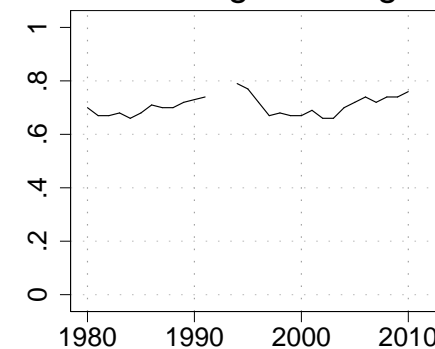

### Length of Cause List

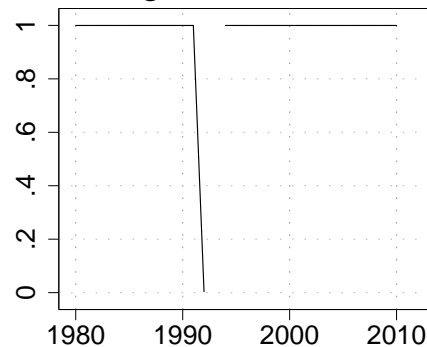

### Age/Sex Unspecified

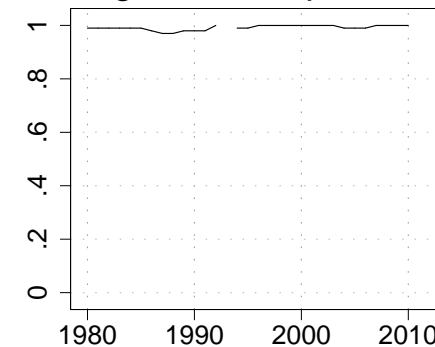

### Medically Impossible Diagnoses

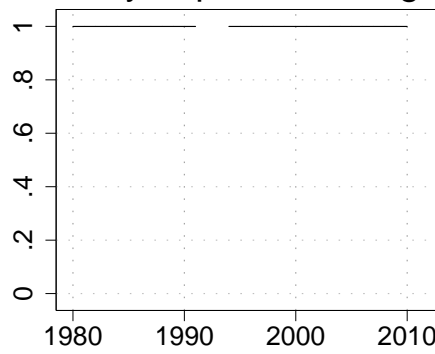

Indicators on their Original (Unweighted) Scale and Subtracted from One Where Necessary so Higher Scores are Preferable to Lower

# Peru

## VS Performance Index

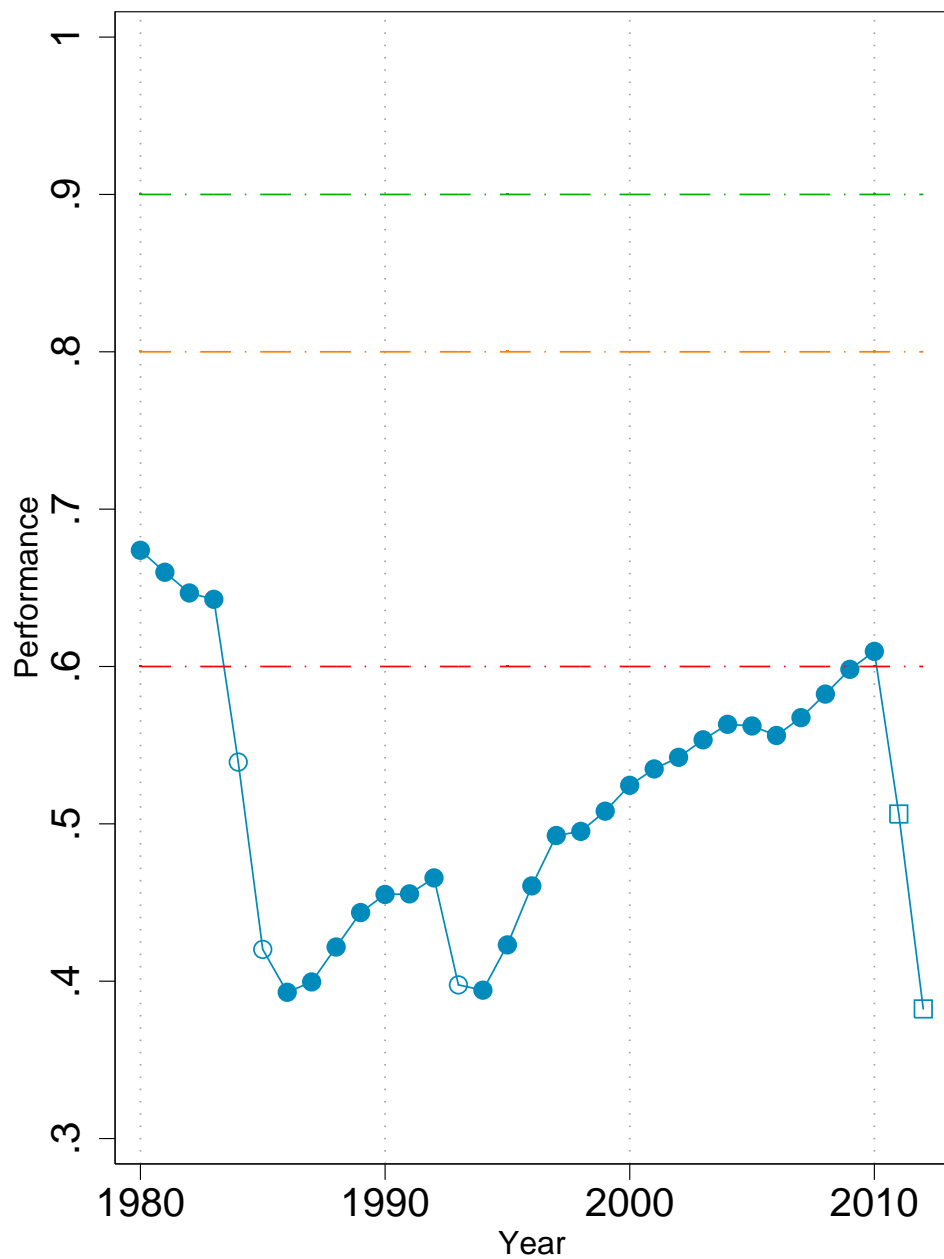

### Completeness

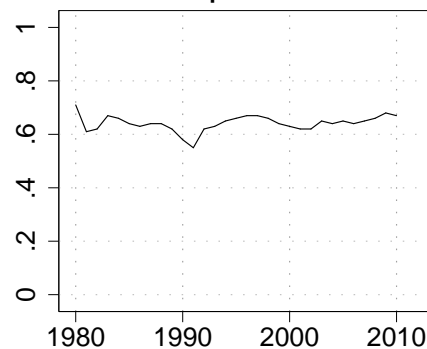

### Garbage Coding

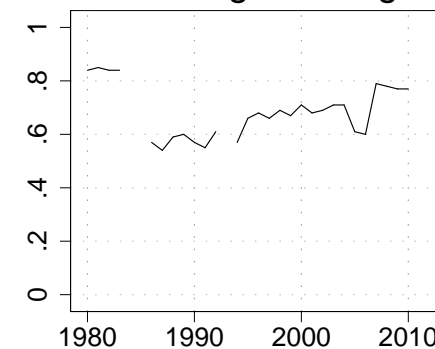

### Length of Cause List

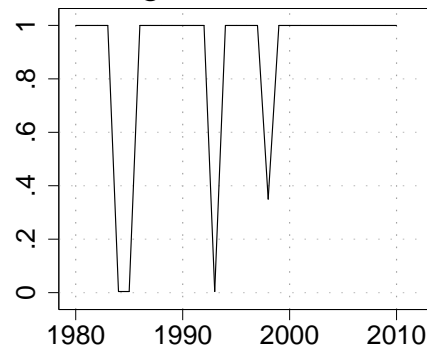

### Age/Sex Unspecified

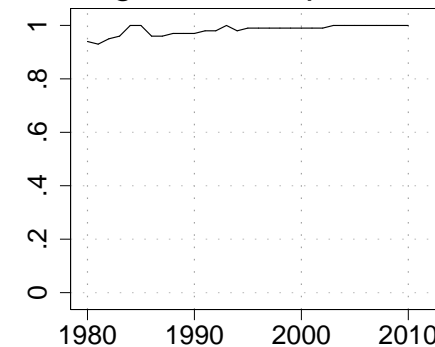

### Medically Impossible Diagnoses

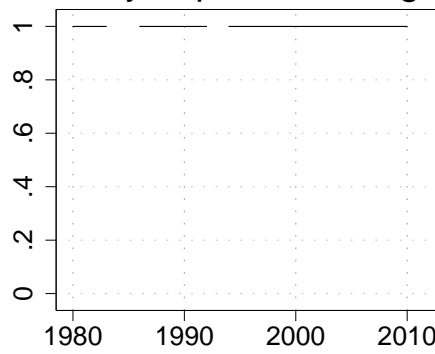

Indicators on their Original (Unweighted) Scale and Subtracted from One Where Necessary so Higher Scores are Preferable to Lower

# Philippines

## VS Performance Index

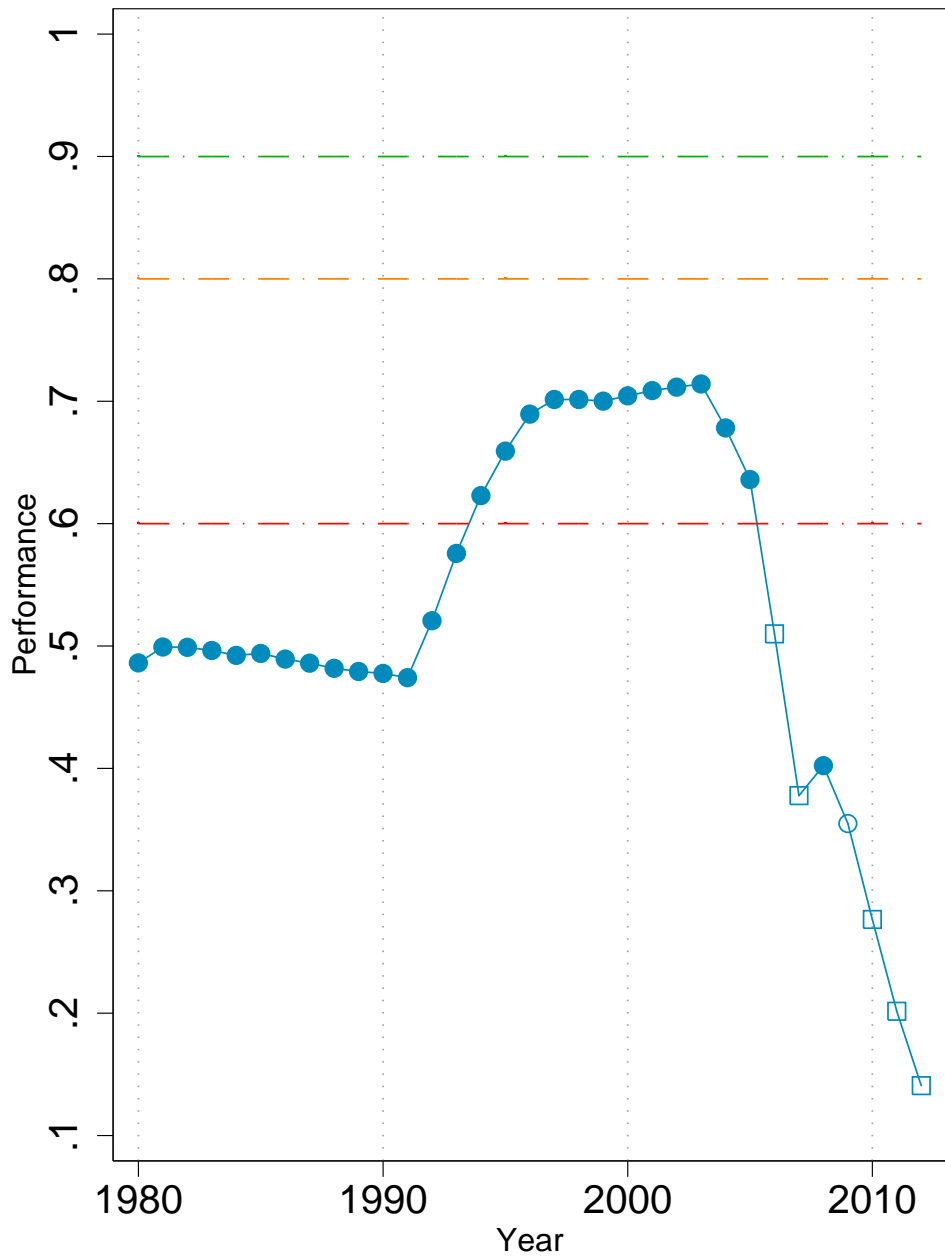

### Completeness

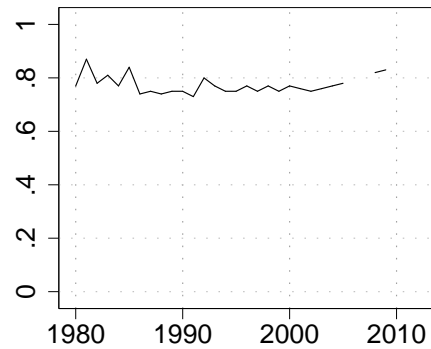

### Garbage Coding

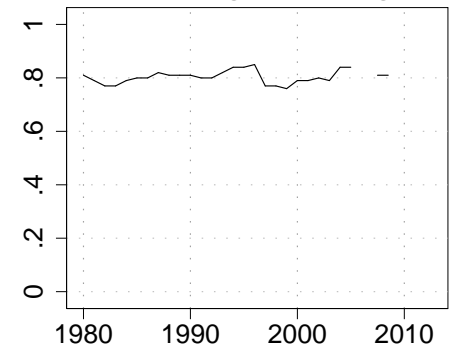

### Length of Cause List

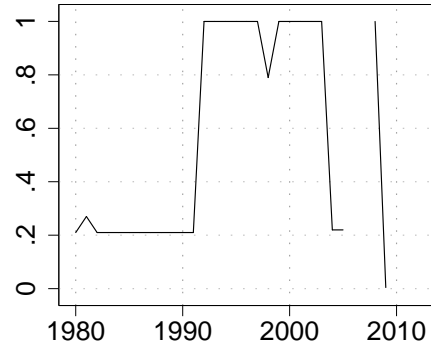

### Age/Sex Unspecified

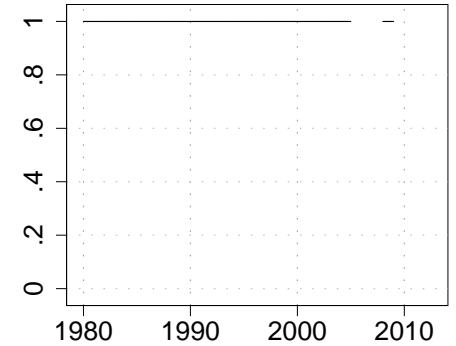

### Medically Impossible Diagnoses

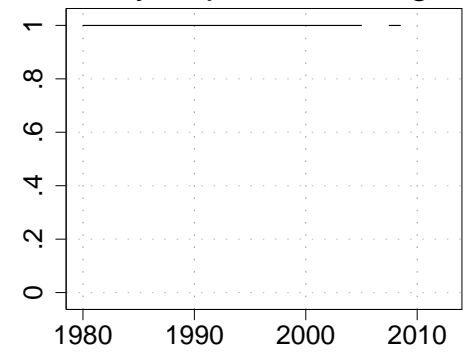

Indicators on their Original (Unweighted) Scale and Subtracted from One Where Necessary so Higher Scores are Preferable to Lower

# Poland

## VS Performance Index

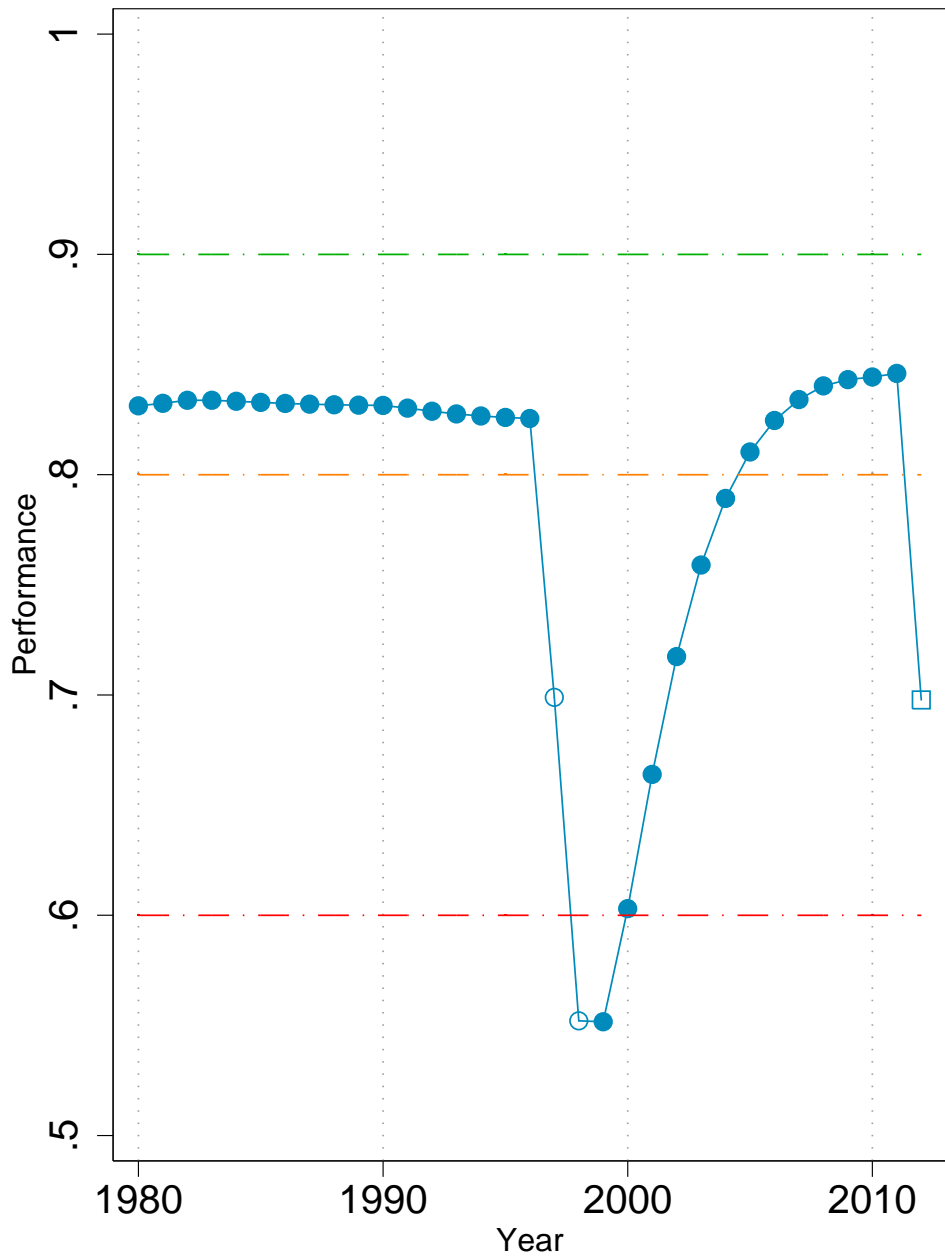

### Completeness

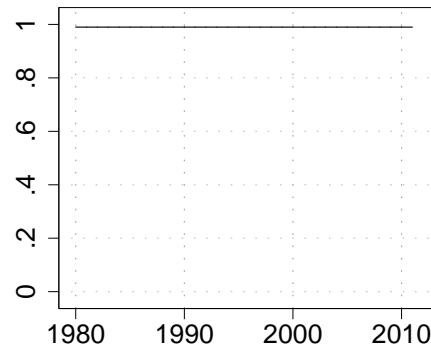

### Garbage Coding

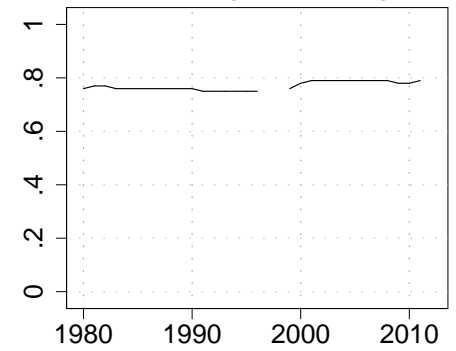

### Length of Cause List

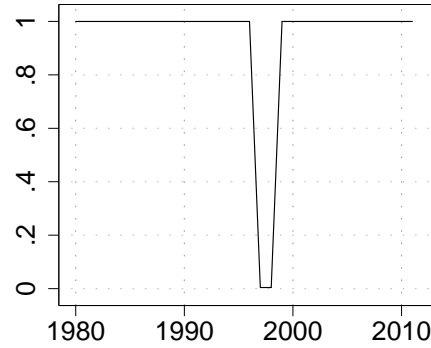

### Age/Sex Unspecified

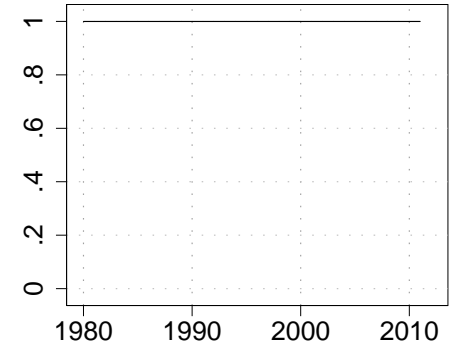

### Medically Impossible Diagnoses

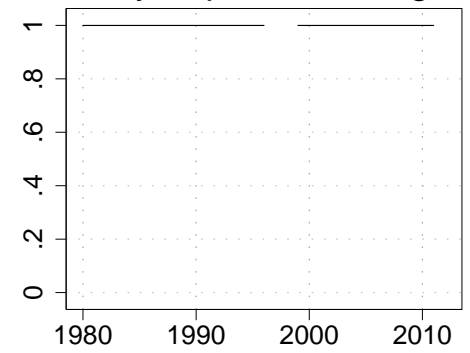

Indicators on their Original (Unweighted) Scale and Subtracted from One Where Necessary so Higher Scores are Preferable to Lower

# Portugal

## VS Performance Index

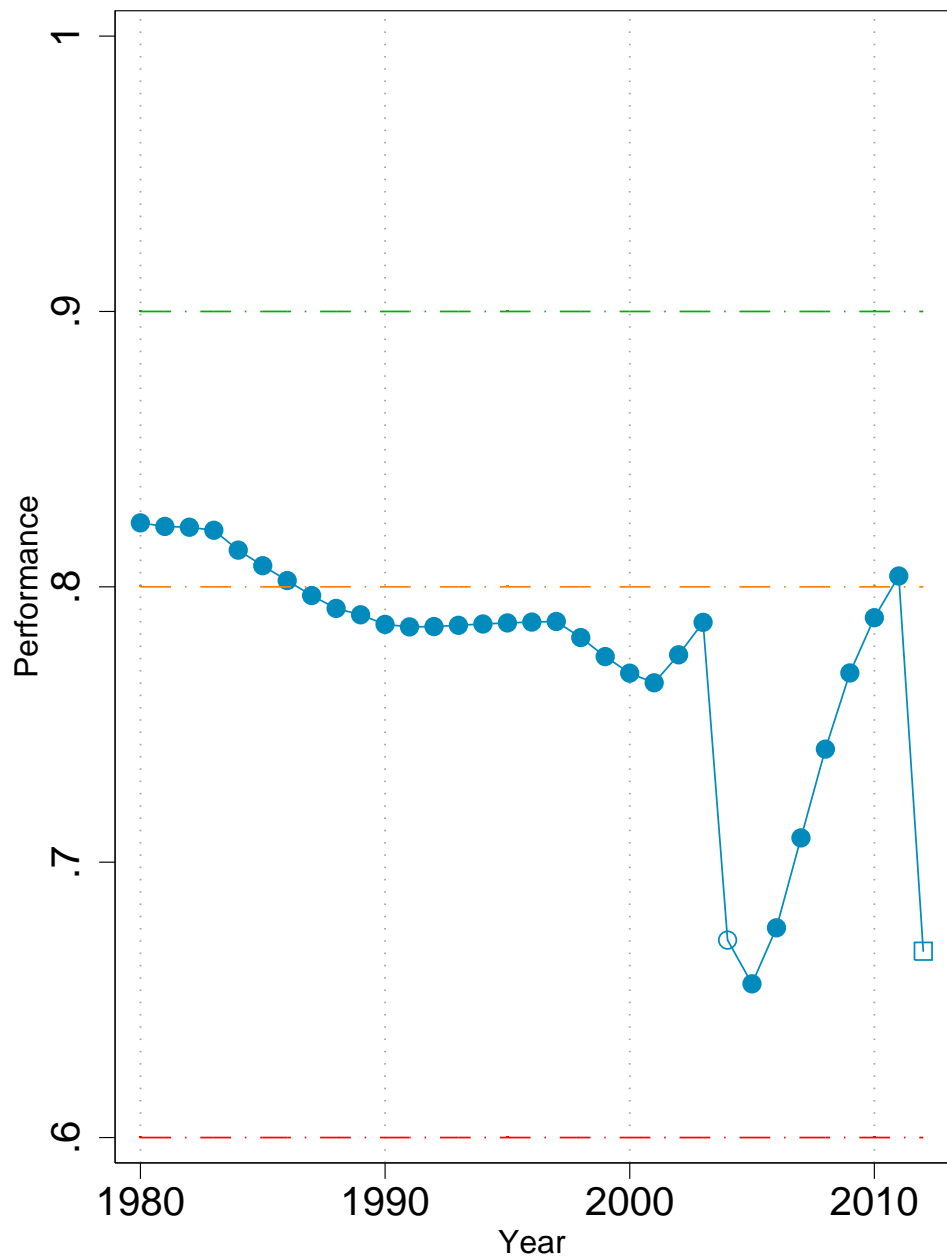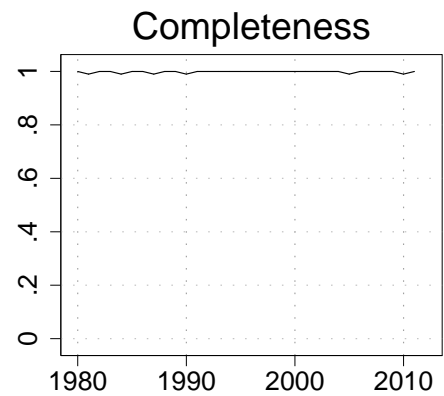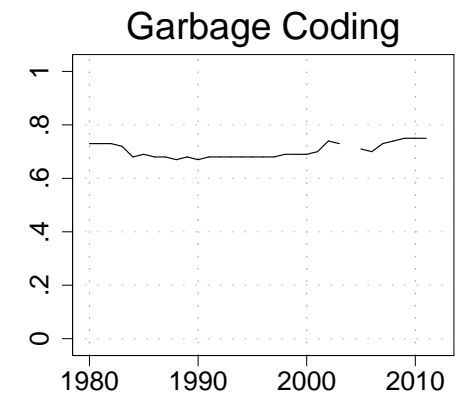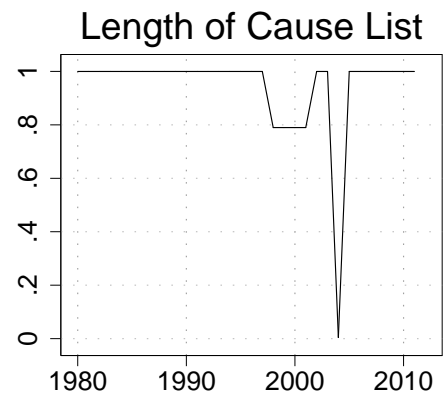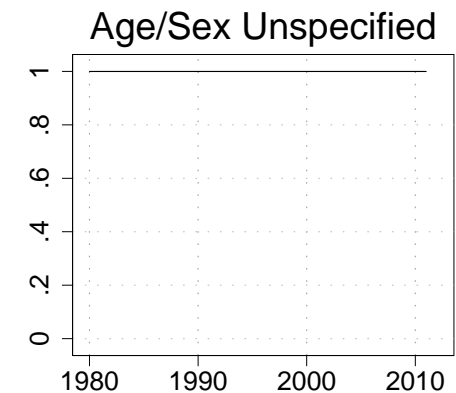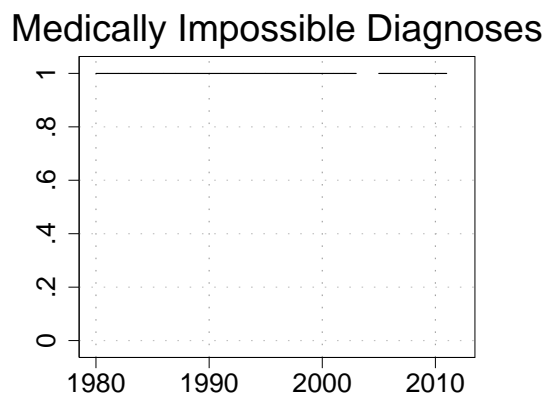

Indicators on their Original (Unweighted) Scale and Subtracted from One Where Necessary so Higher Scores are Preferable to Lower

# Puerto Rico

## VS Performance Index

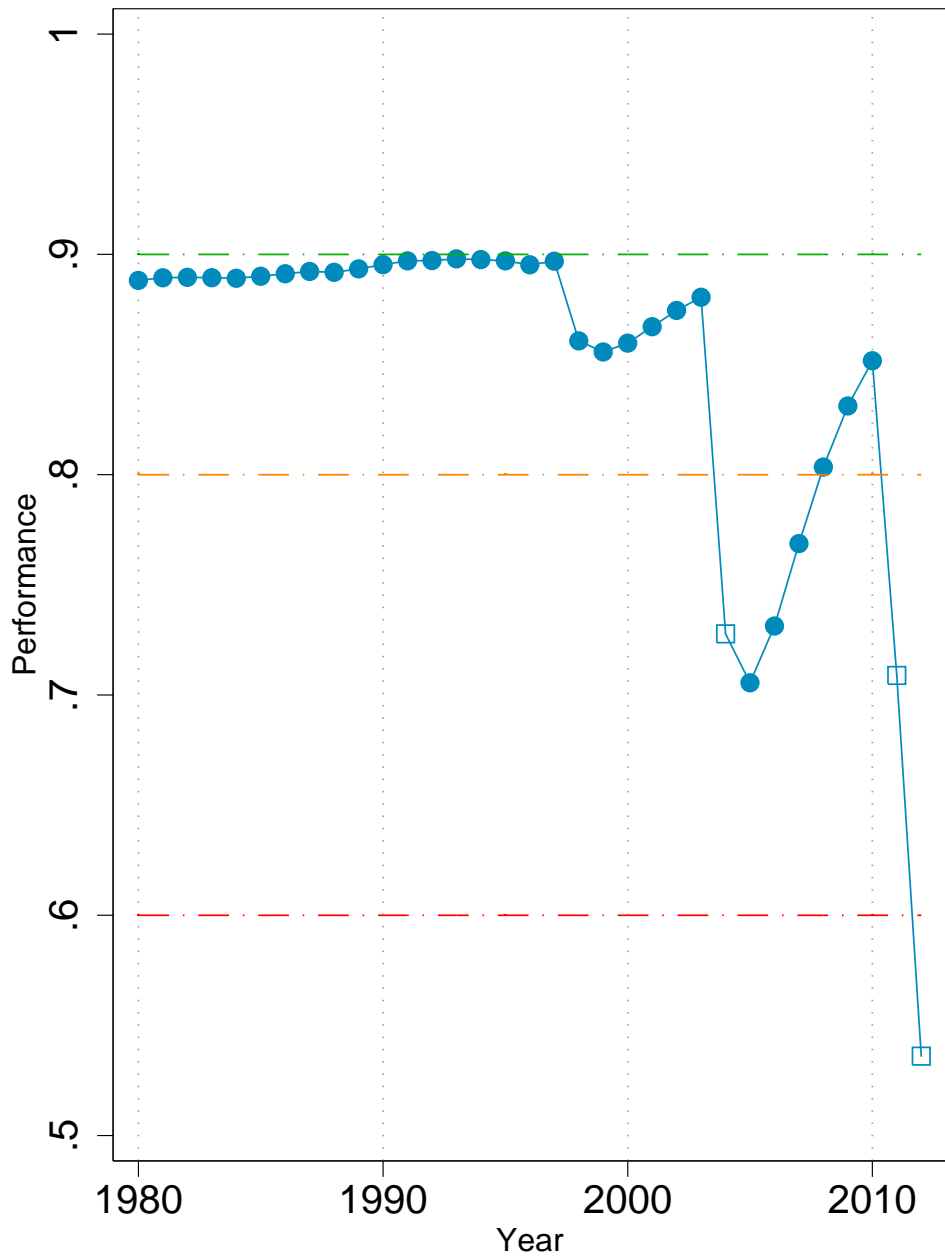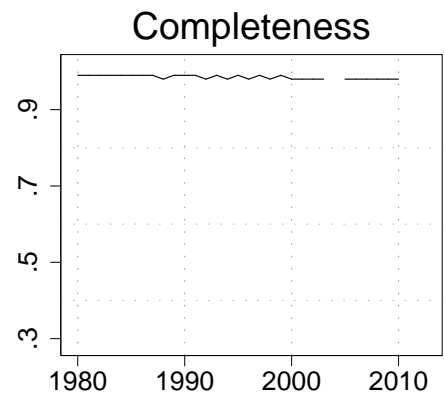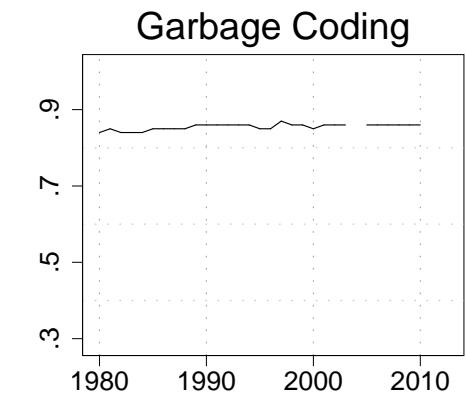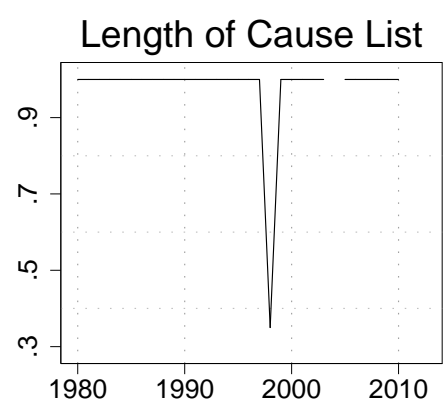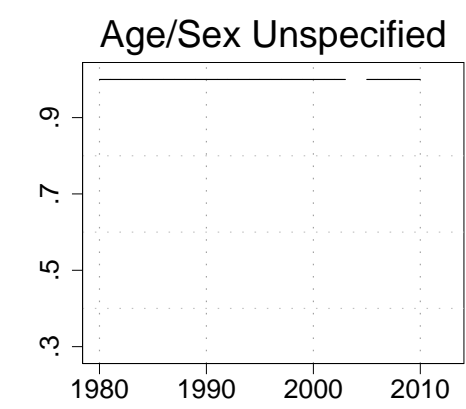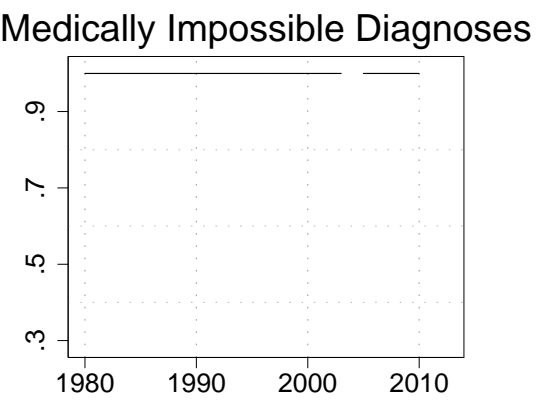

Indicators on their Original (Unweighted) Scale and Subtracted from One Where Necessary so Higher Scores are Preferable to Lower



# Qatar

## VS Performance Index

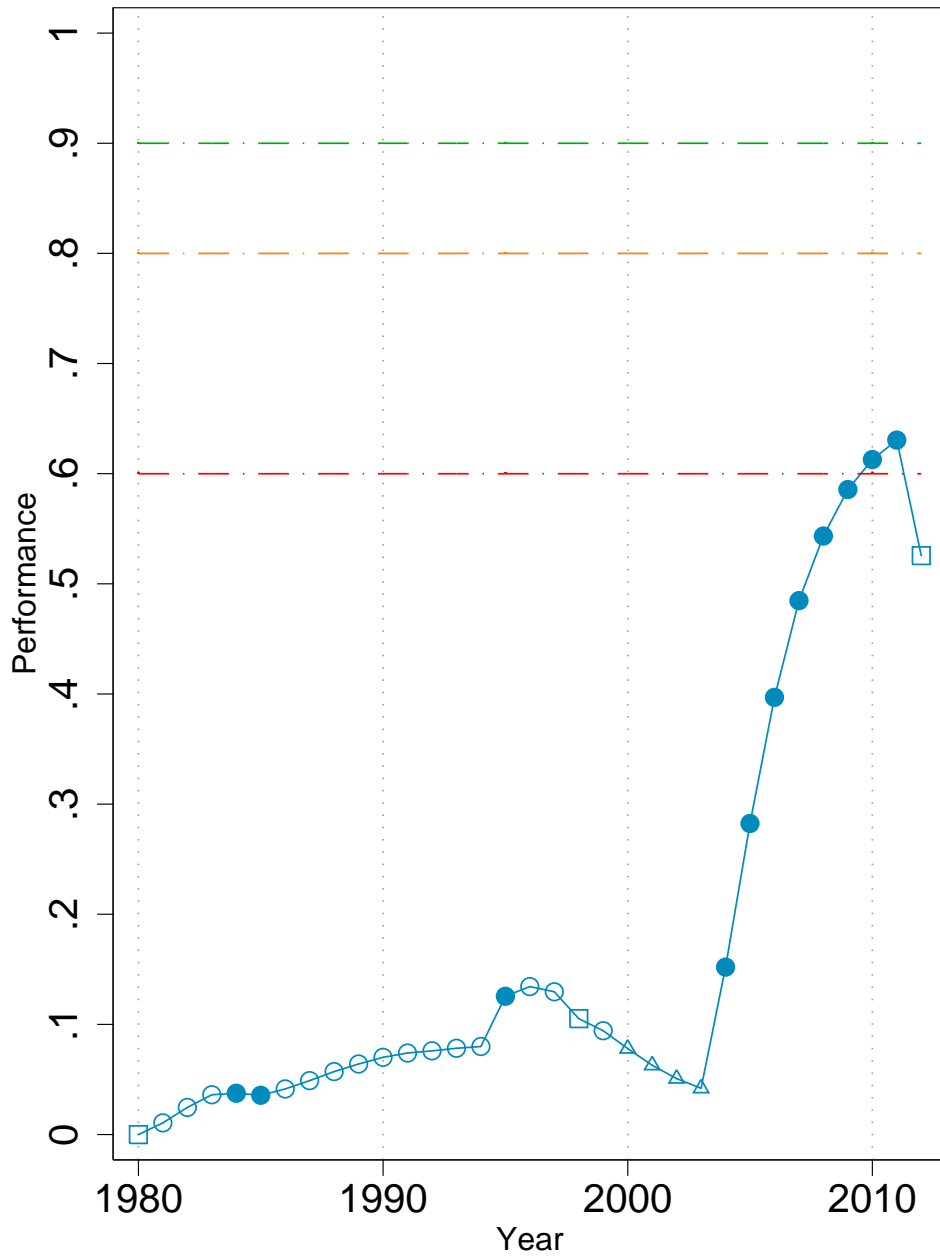

## Completeness

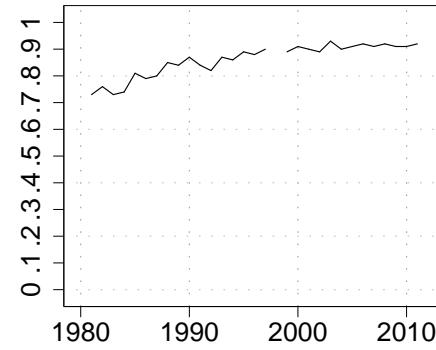

## Garbage Coding

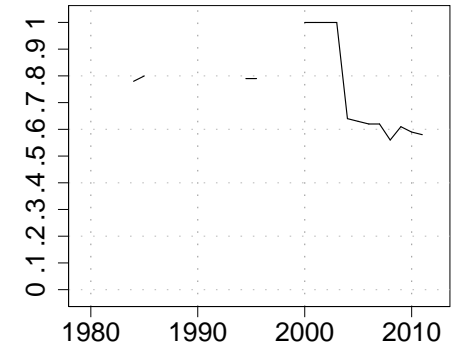

## Length of Cause List

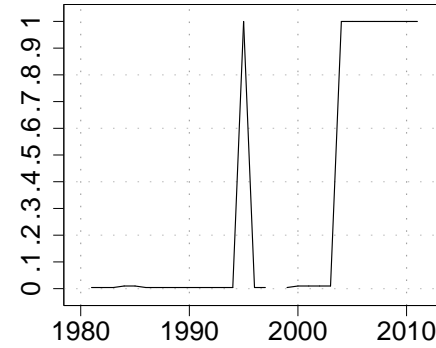

## Age/Sex Unspecified

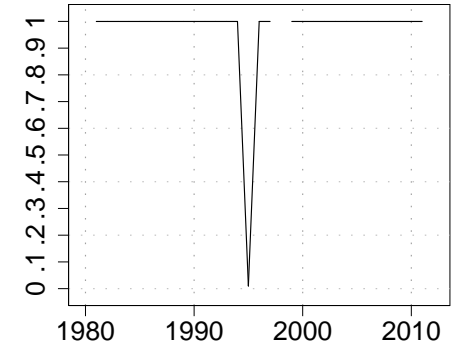

## Medically Impossible Diagnoses

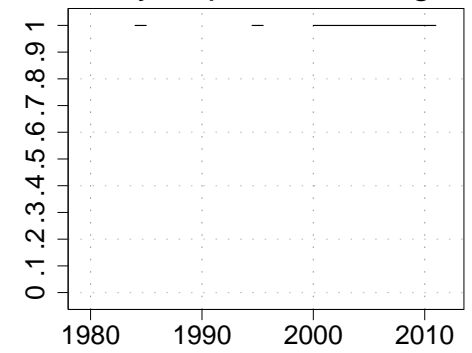

Indicators on their Original (Unweighted) Scale  
and Subtracted from One Where Necessary so Higher Scores are Preferable to Lower

# Romania

## VS Performance Index

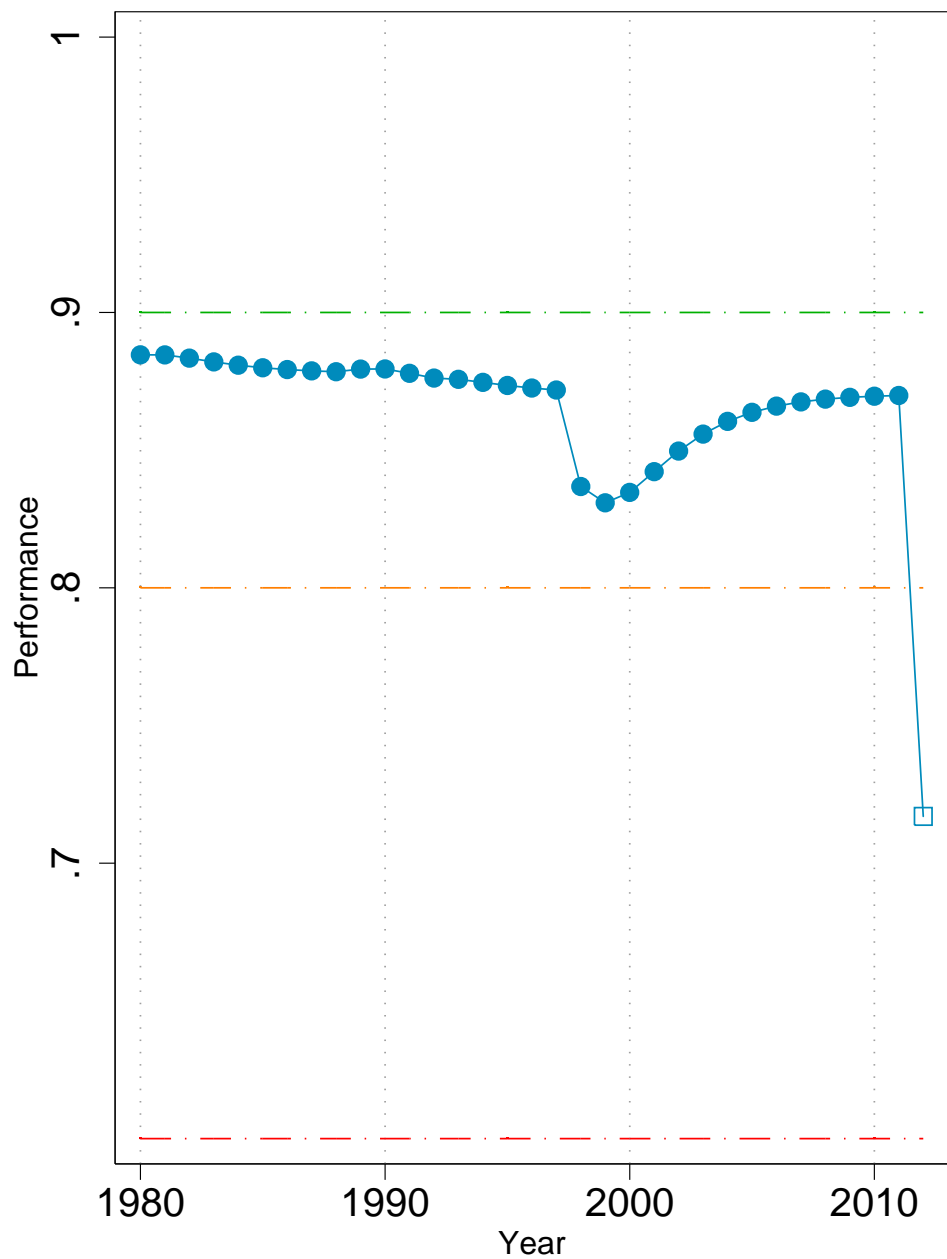

### Completeness

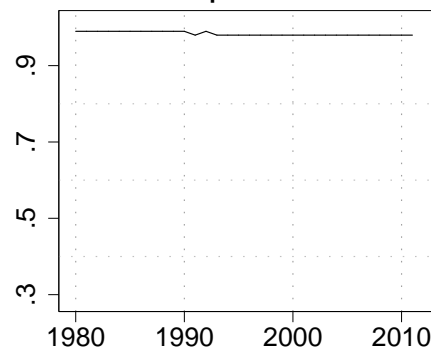

### Garbage Coding

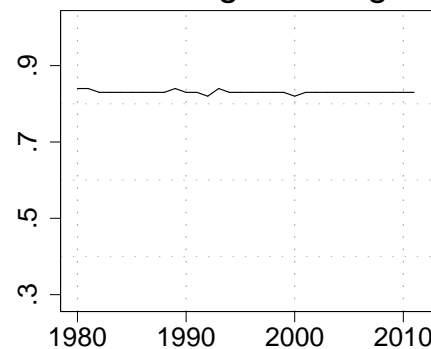

### Length of Cause List

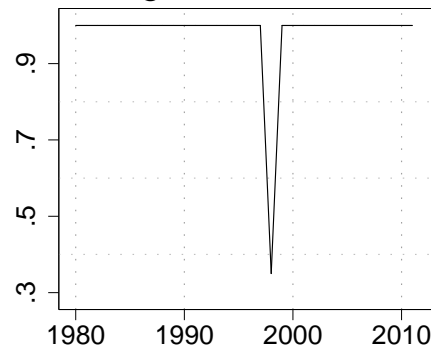

### Age/Sex Unspecified

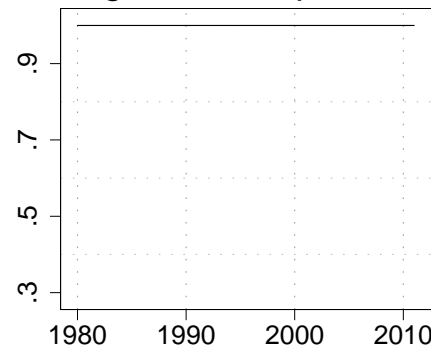

### Medically Impossible Diagnoses

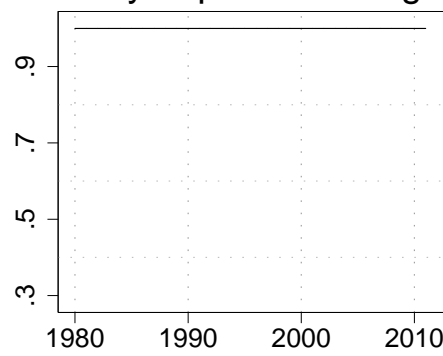

Indicators on their Original (Unweighted) Scale and Subtracted from One Where Necessary so Higher Scores are Preferable to Lower

# Russia

## VS Performance Index

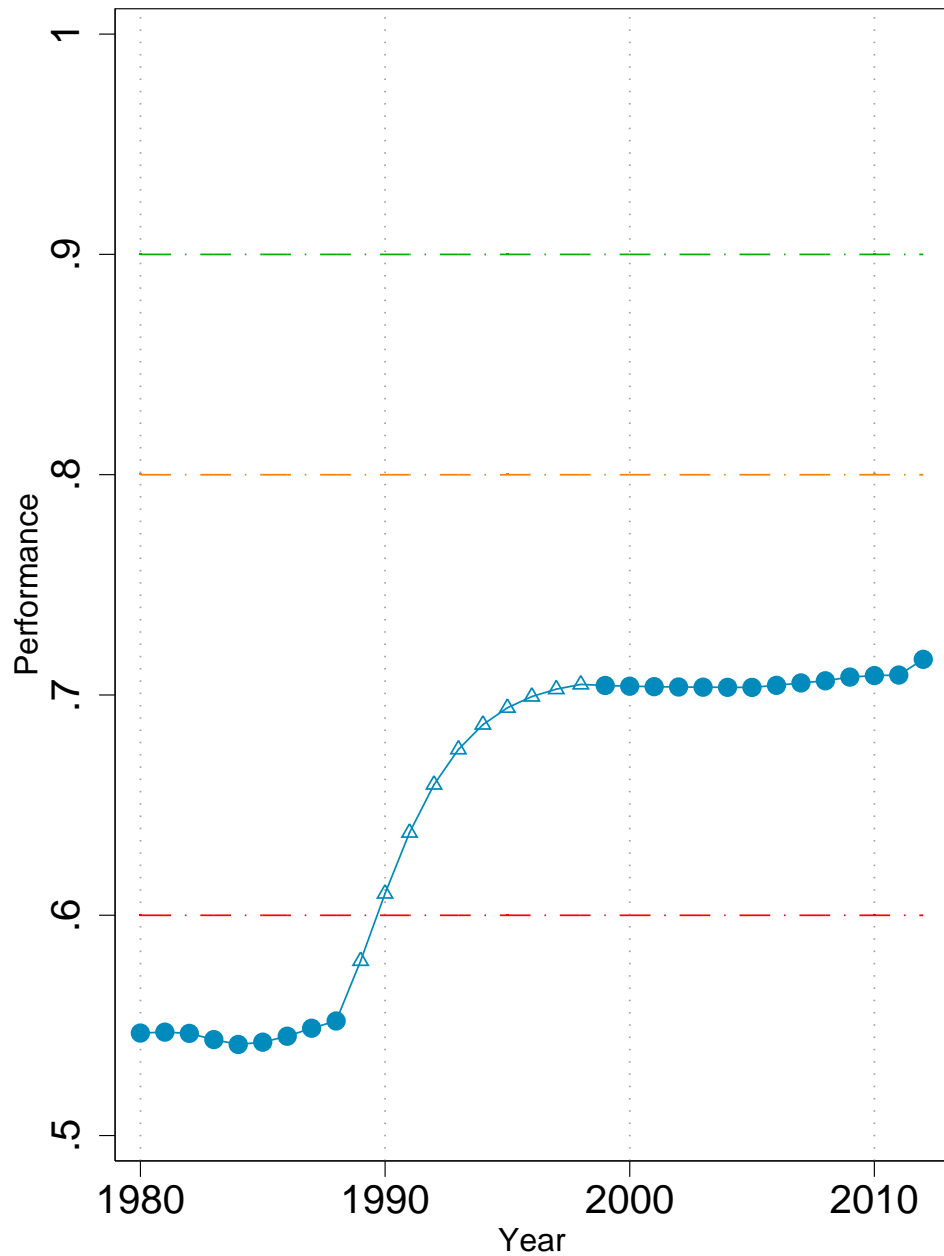

### Completeness

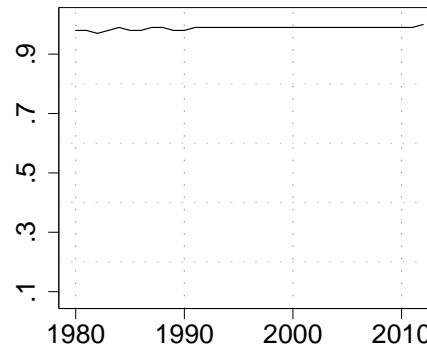

### Garbage Coding

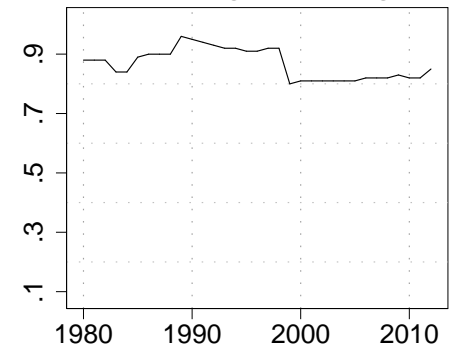

### Length of Cause List

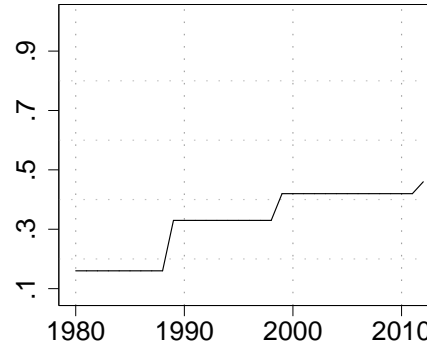

### Age/Sex Unspecified

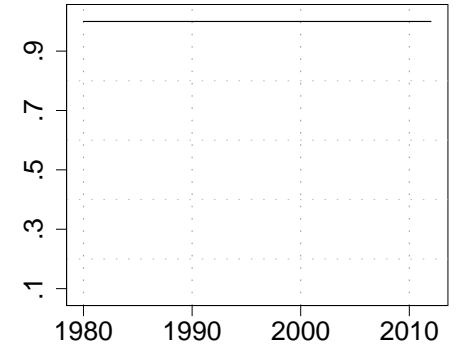

### Medically Impossible Diagnoses

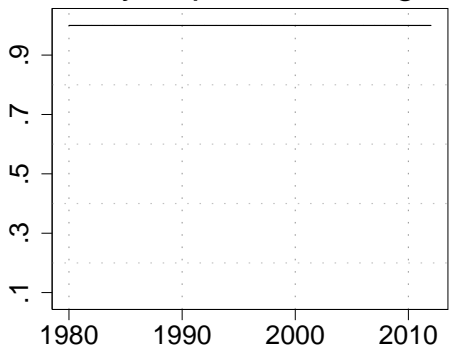

Indicators on their Original (Unweighted) Scale and Subtracted from One Where Necessary so Higher Scores are Preferable to Lower

# Saint Lucia

## VS Performance Index

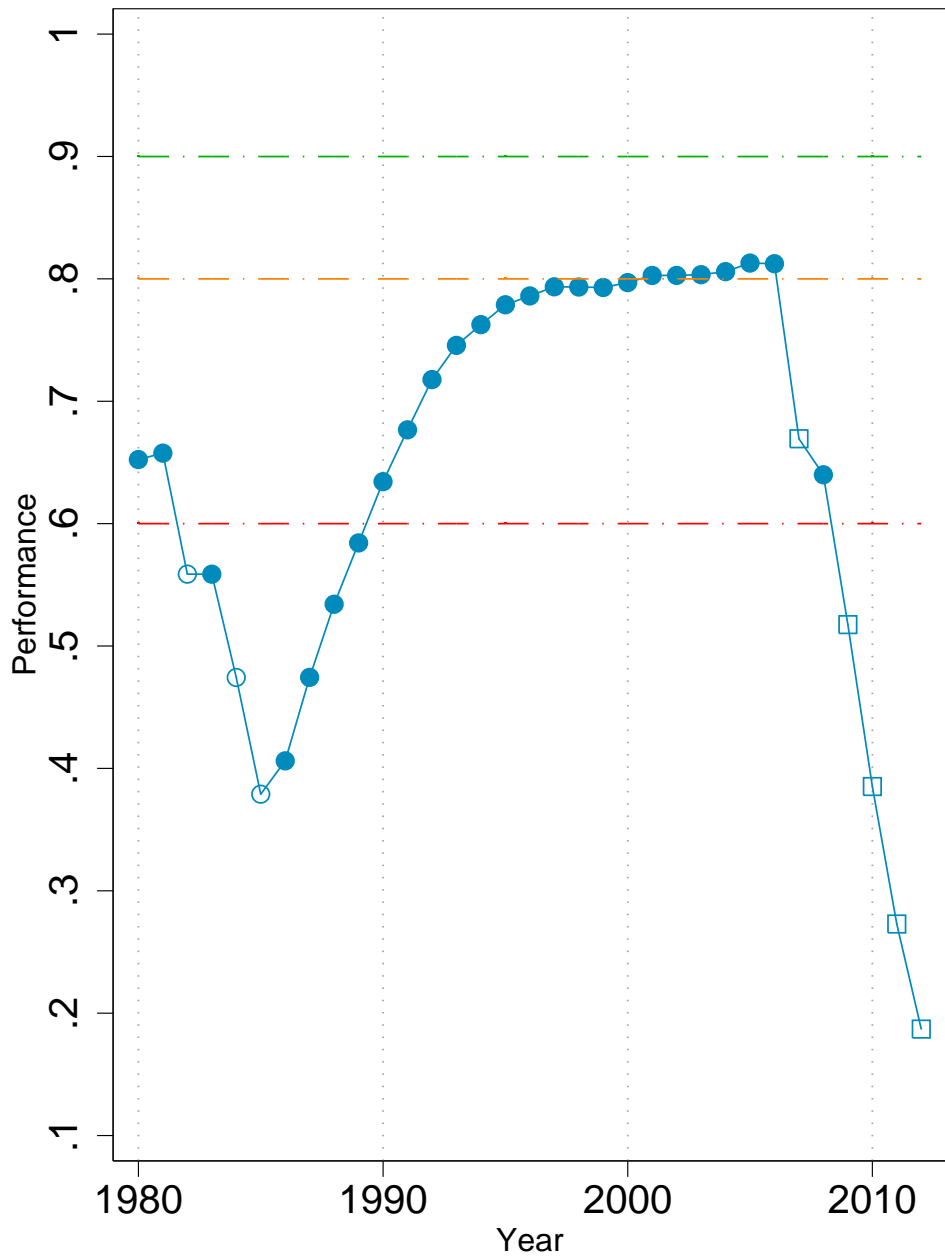

### Completeness

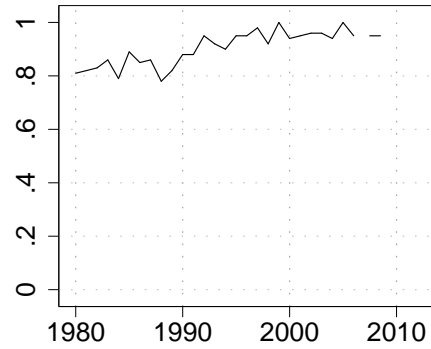

### Garbage Coding

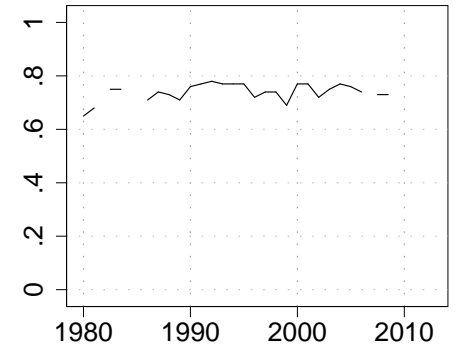

### Length of Cause List

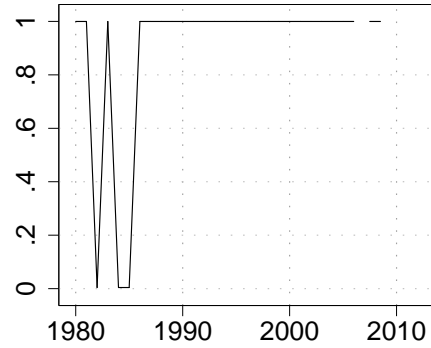

### Age/Sex Unspecified

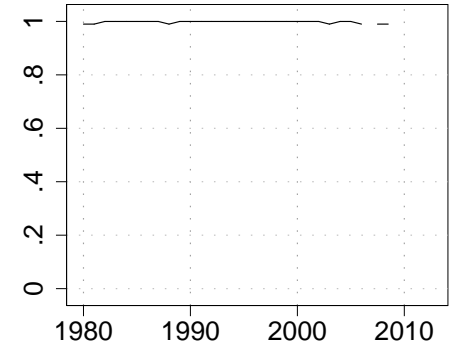

### Medically Impossible Diagnoses

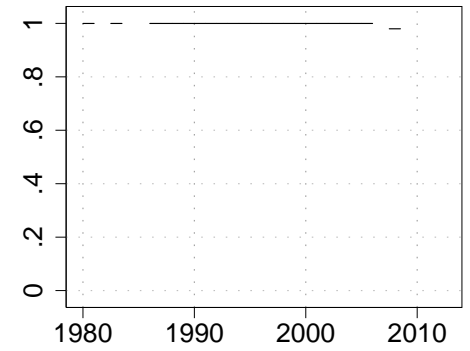

Indicators on their Original (Unweighted) Scale and Subtracted from One Where Necessary so Higher Scores are Preferable to Lower

# Saint Vincent and the Grenadines VS Performance Index

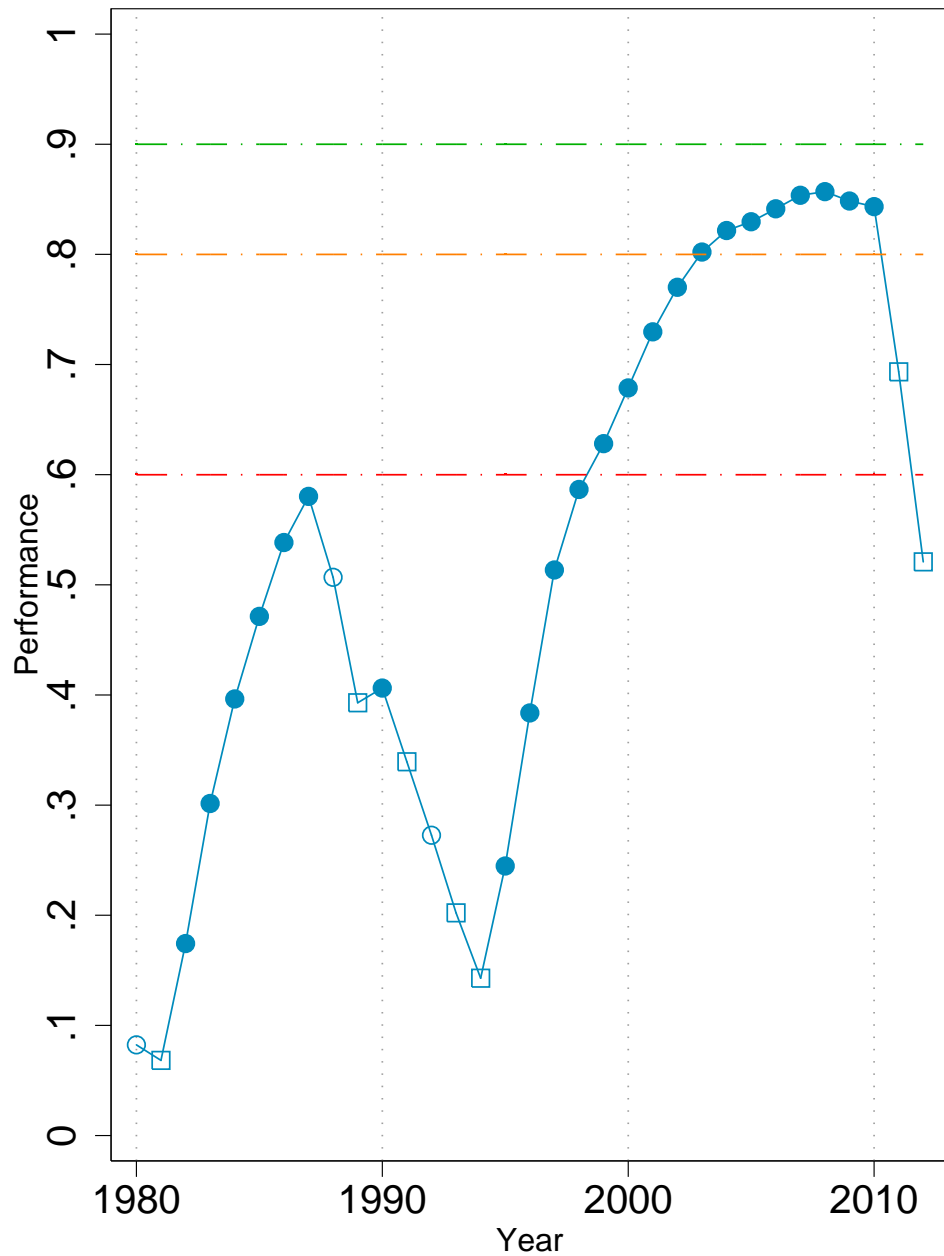

### Completeness

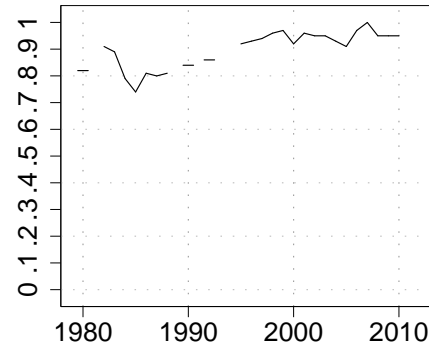

### Garbage Coding

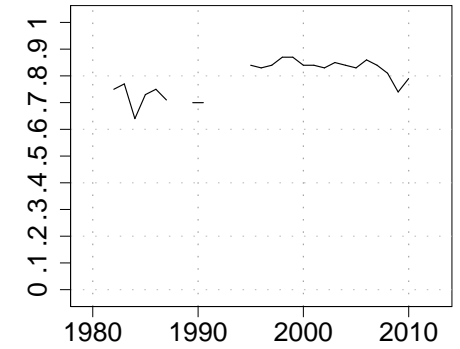

### Length of Cause List

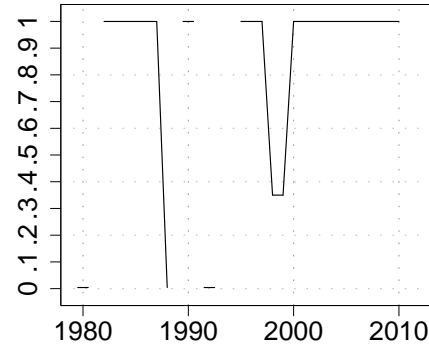

### Age/Sex Unspecified

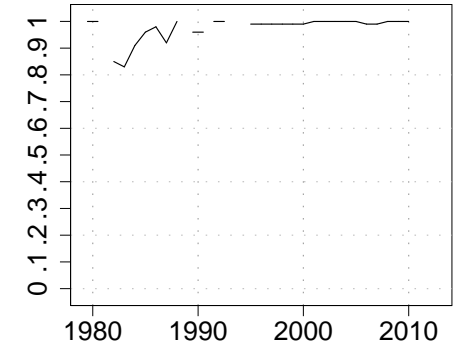

### Medically Impossible Diagnoses

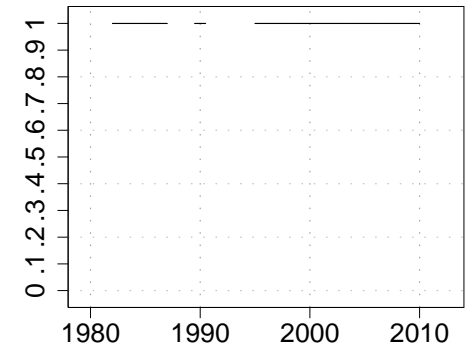

Indicators on their Original (Unweighted) Scale  
and Subtracted from One Where Necessary so Higher Scores are Preferable to Lower

# Samoa

## VS Performance Index

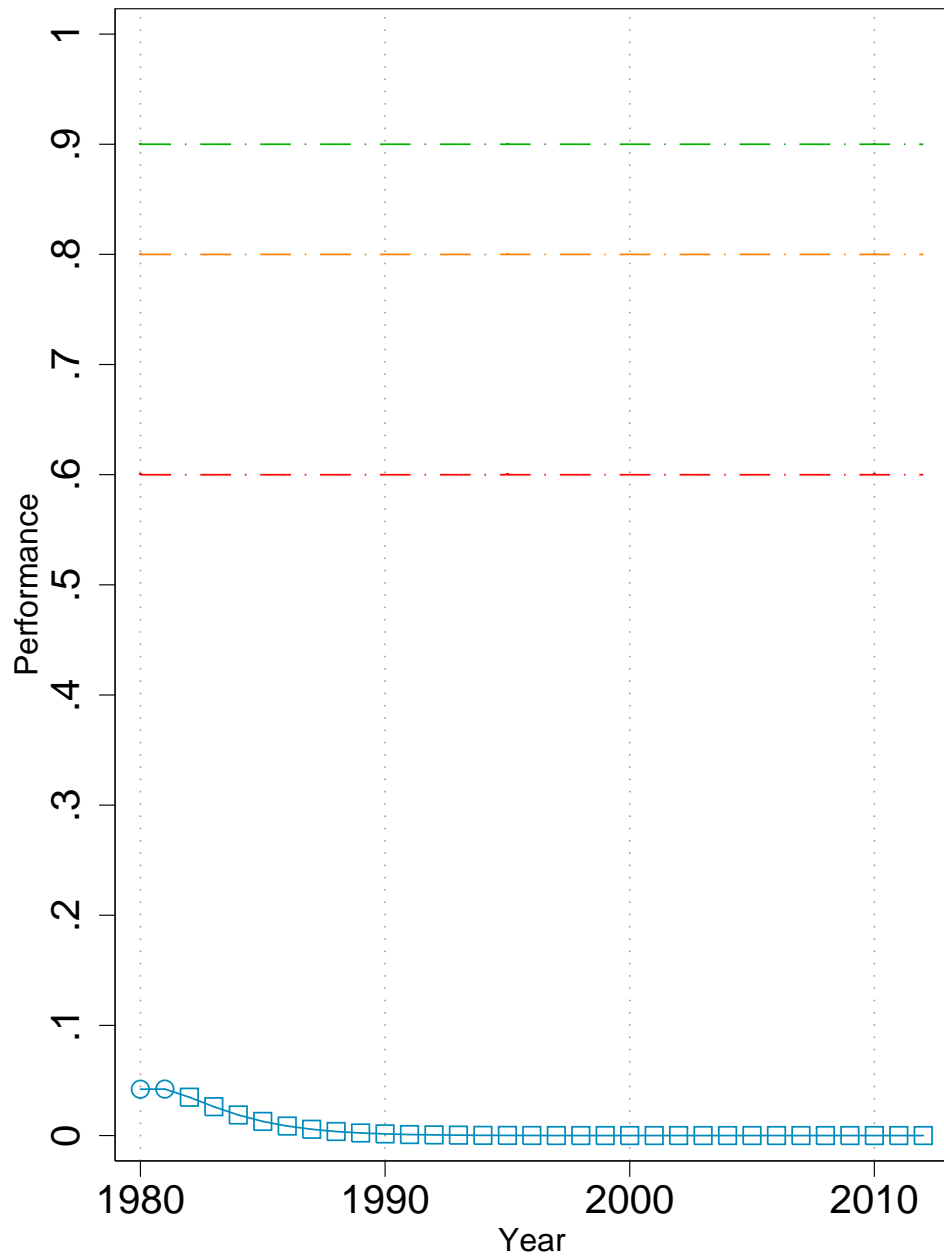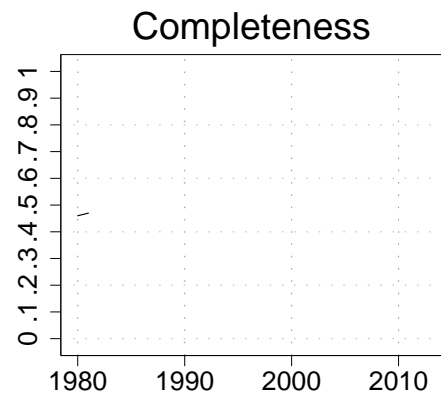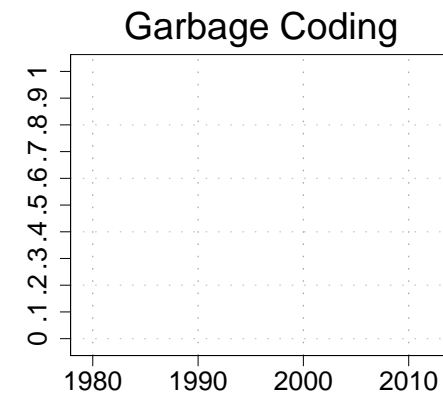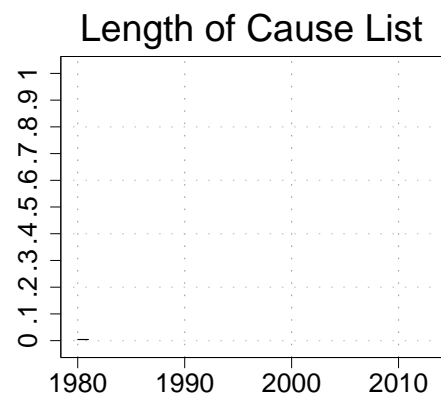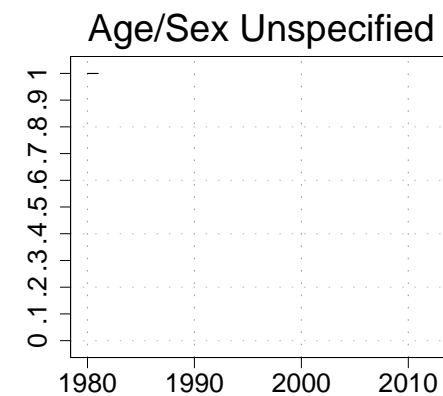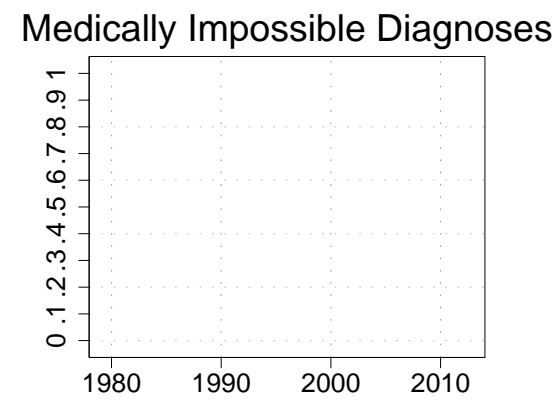

Indicators on their Original (Unweighted) Scale and Subtracted from One Where Necessary so Higher Scores are Preferable to Lower

# Sao Tome and Principe

## VS Performance Index

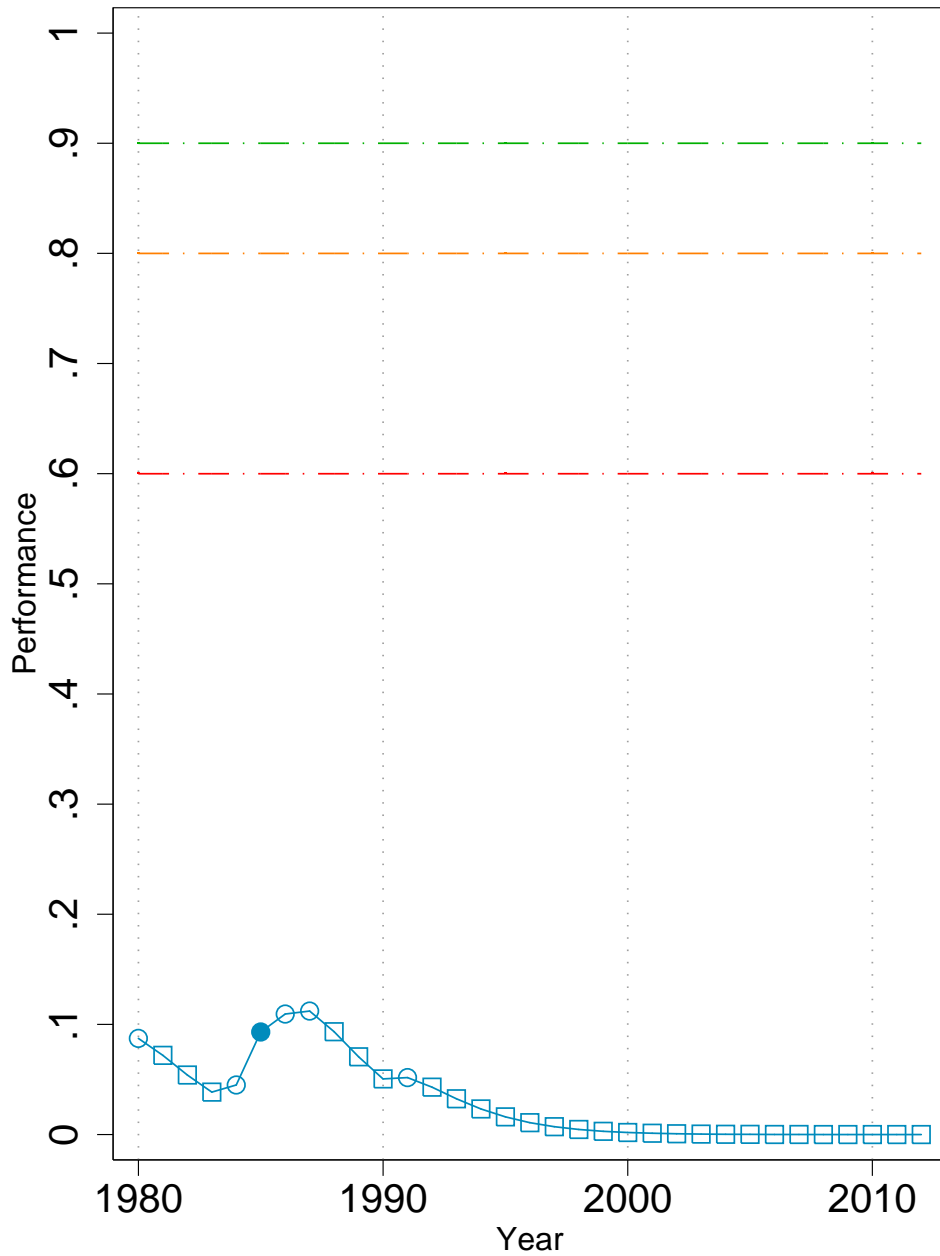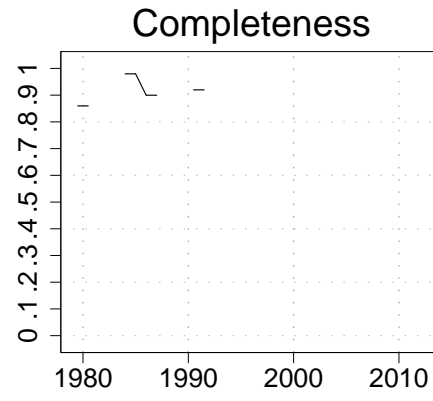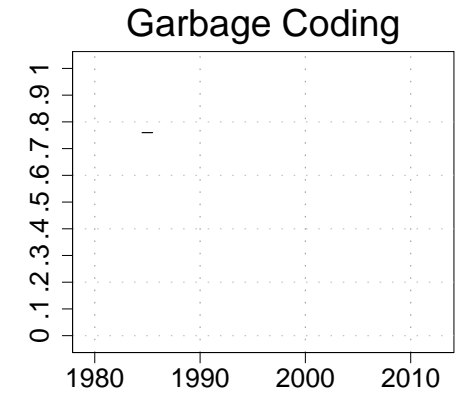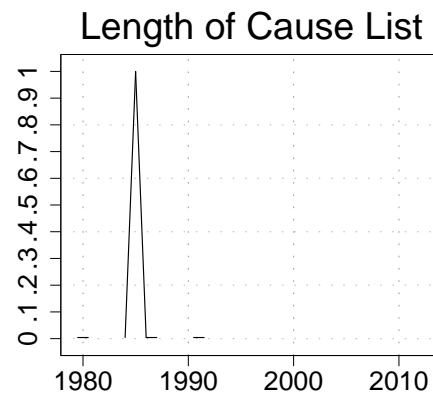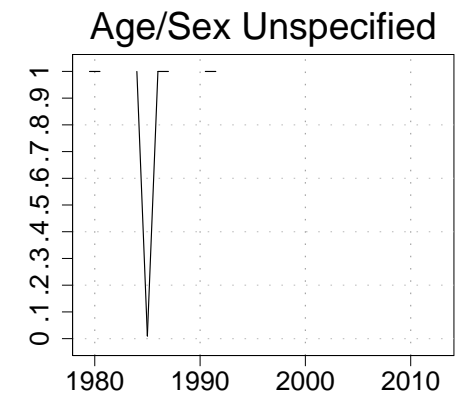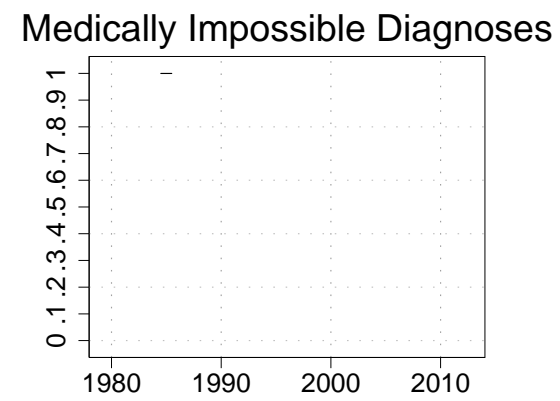

Indicators on their Original (Unweighted) Scale and Subtracted from One Where Necessary so Higher Scores are Preferable to Lower

# Saudi Arabia

## VS Performance Index

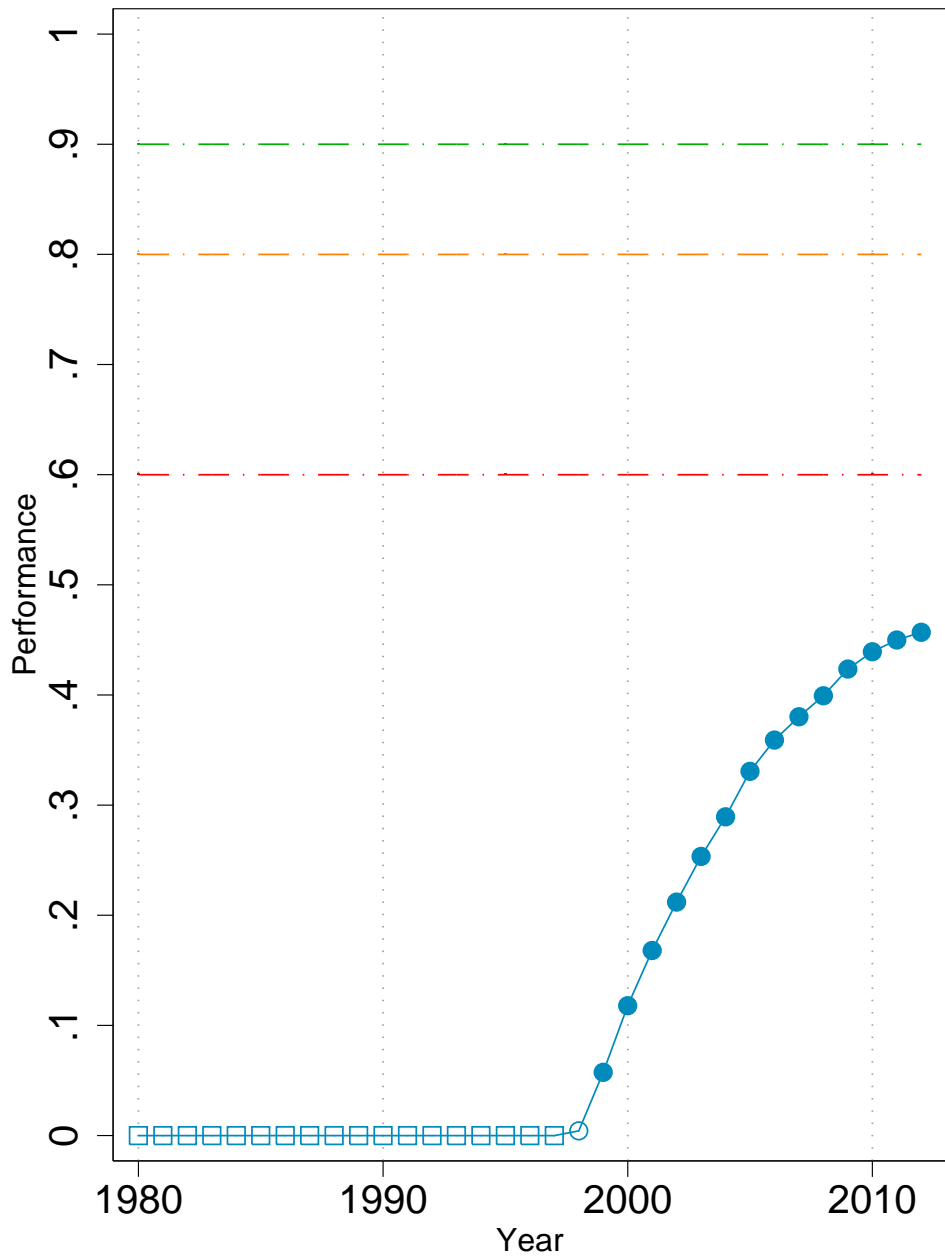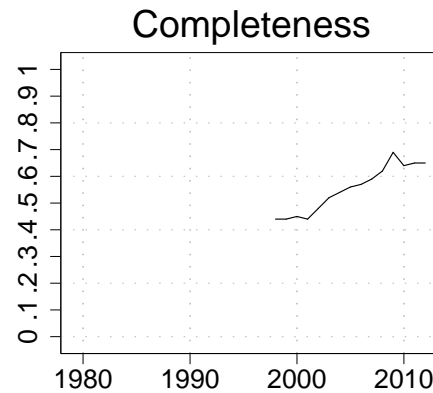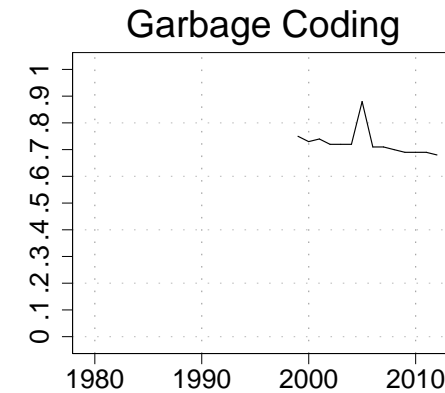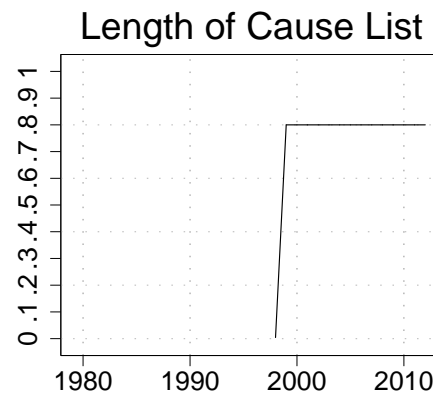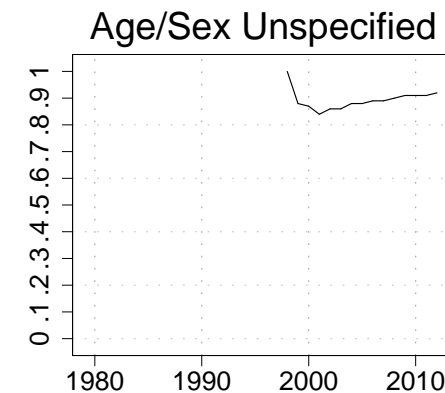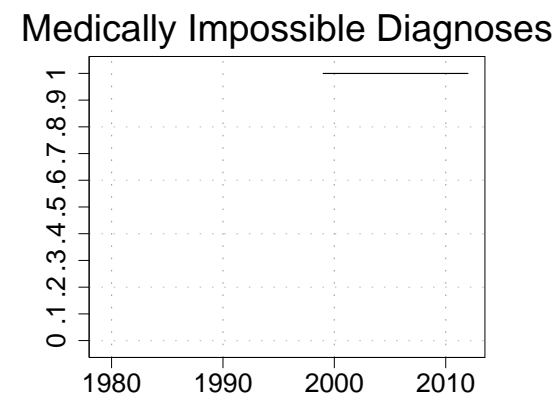

Indicators on their Original (Unweighted) Scale and Subtracted from One Where Necessary so Higher Scores are Preferable to Lower



# Serbia

## VS Performance Index

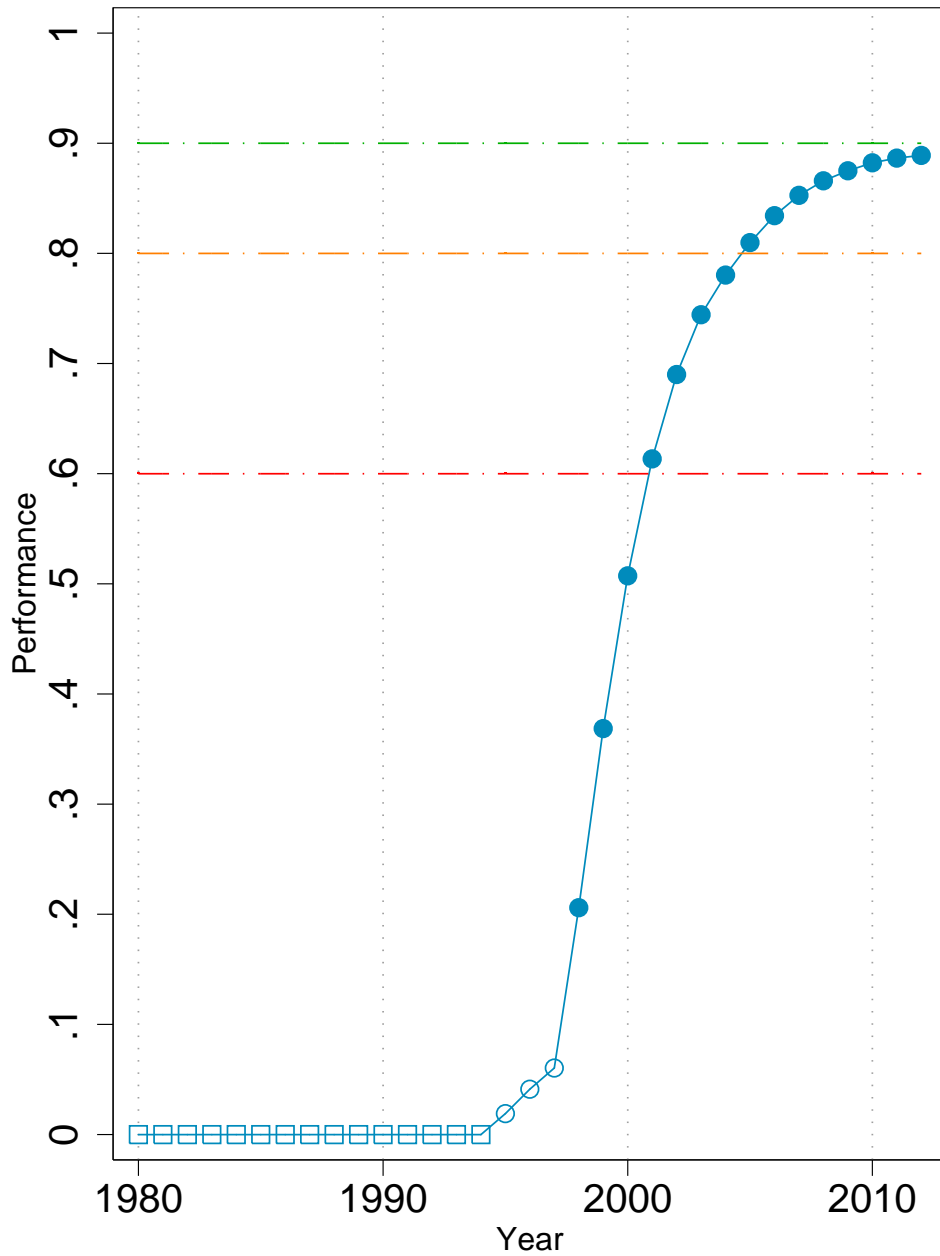

### Completeness

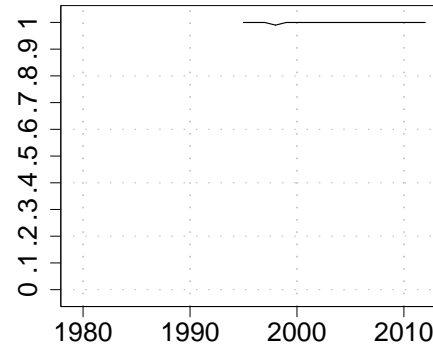

### Garbage Coding

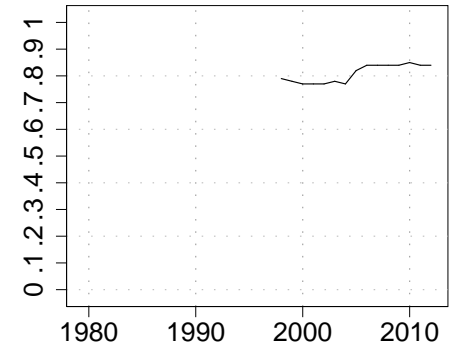

### Length of Cause List

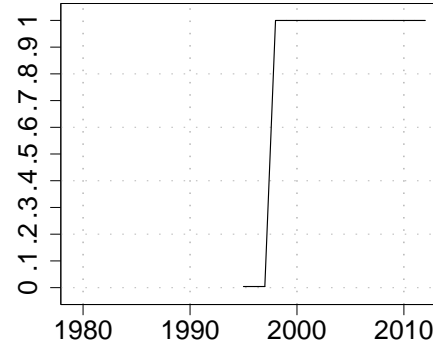

### Age/Sex Unspecified

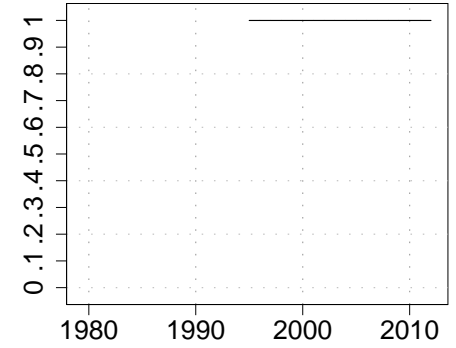

### Medically Impossible Diagnoses

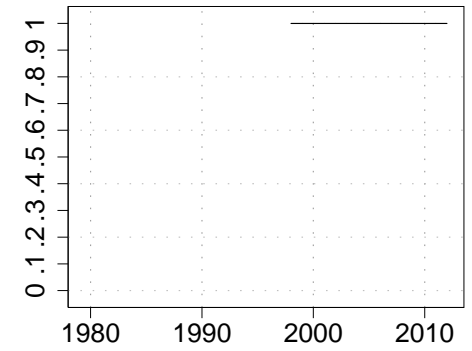

Indicators on their Original (Unweighted) Scale and Subtracted from One Where Necessary so Higher Scores are Preferable to Lower

# Seychelles

## VS Performance Index

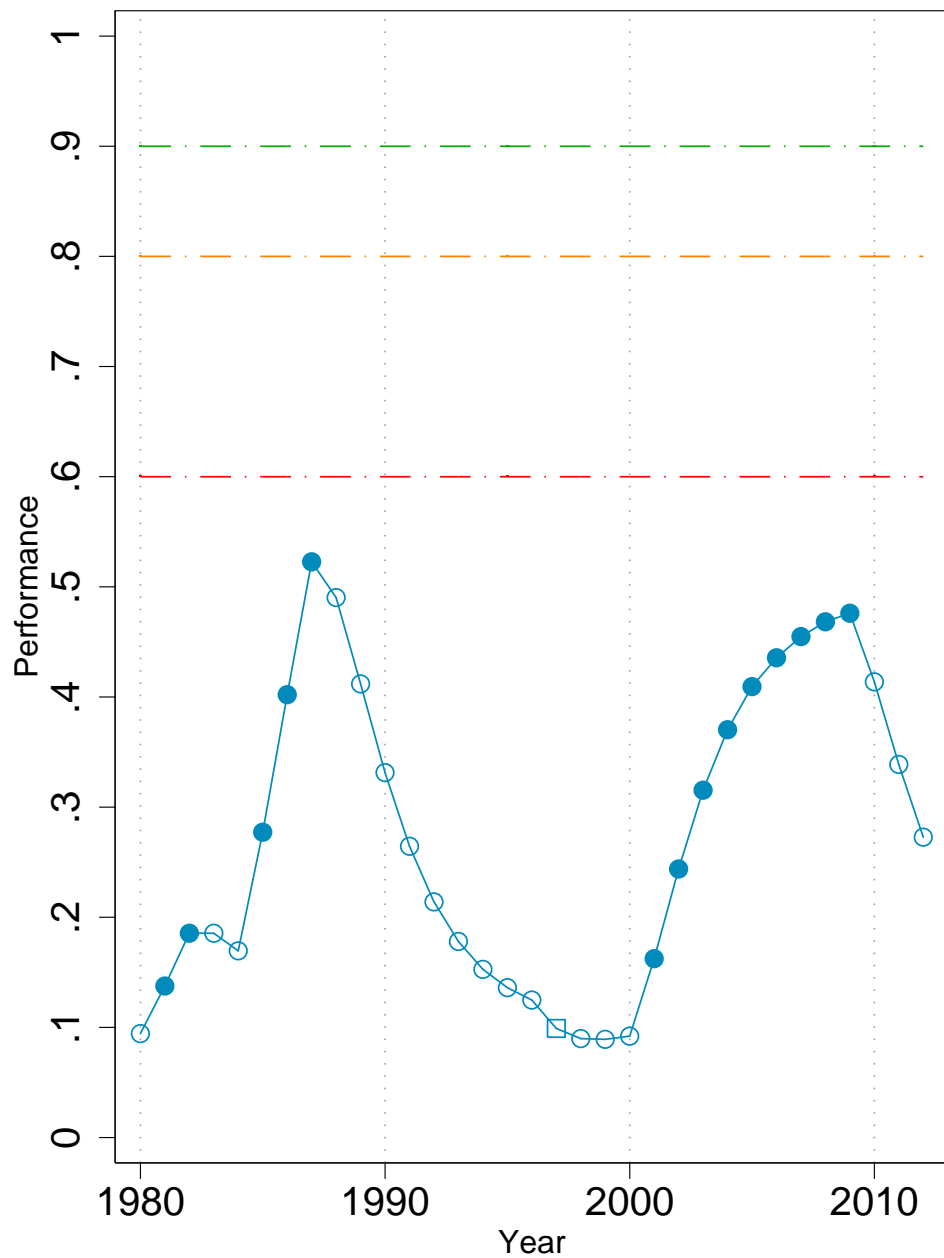

### Completeness

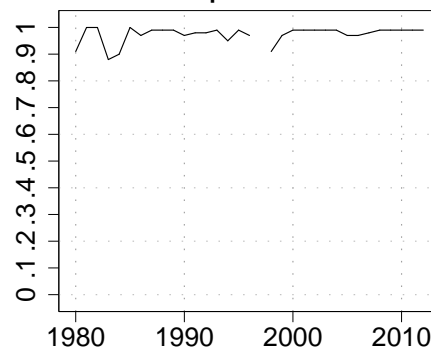

### Garbage Coding

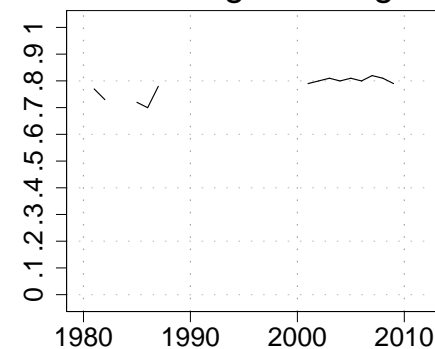

### Length of Cause List

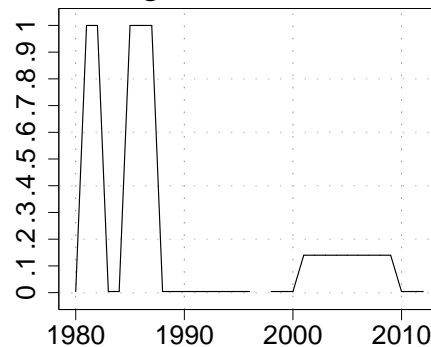

### Age/Sex Unspecified

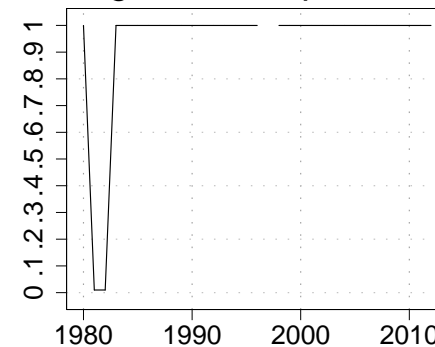

### Medically Impossible Diagnoses

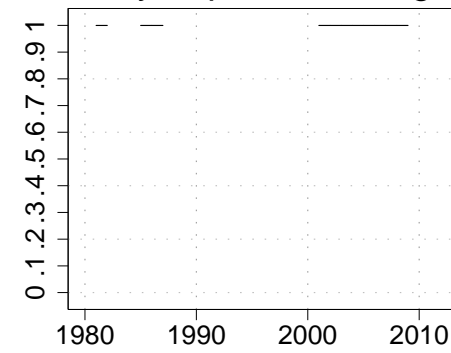

Indicators on their Original (Unweighted) Scale and Subtracted from One Where Necessary so Higher Scores are Preferable to Lower

# Singapore

## VS Performance Index

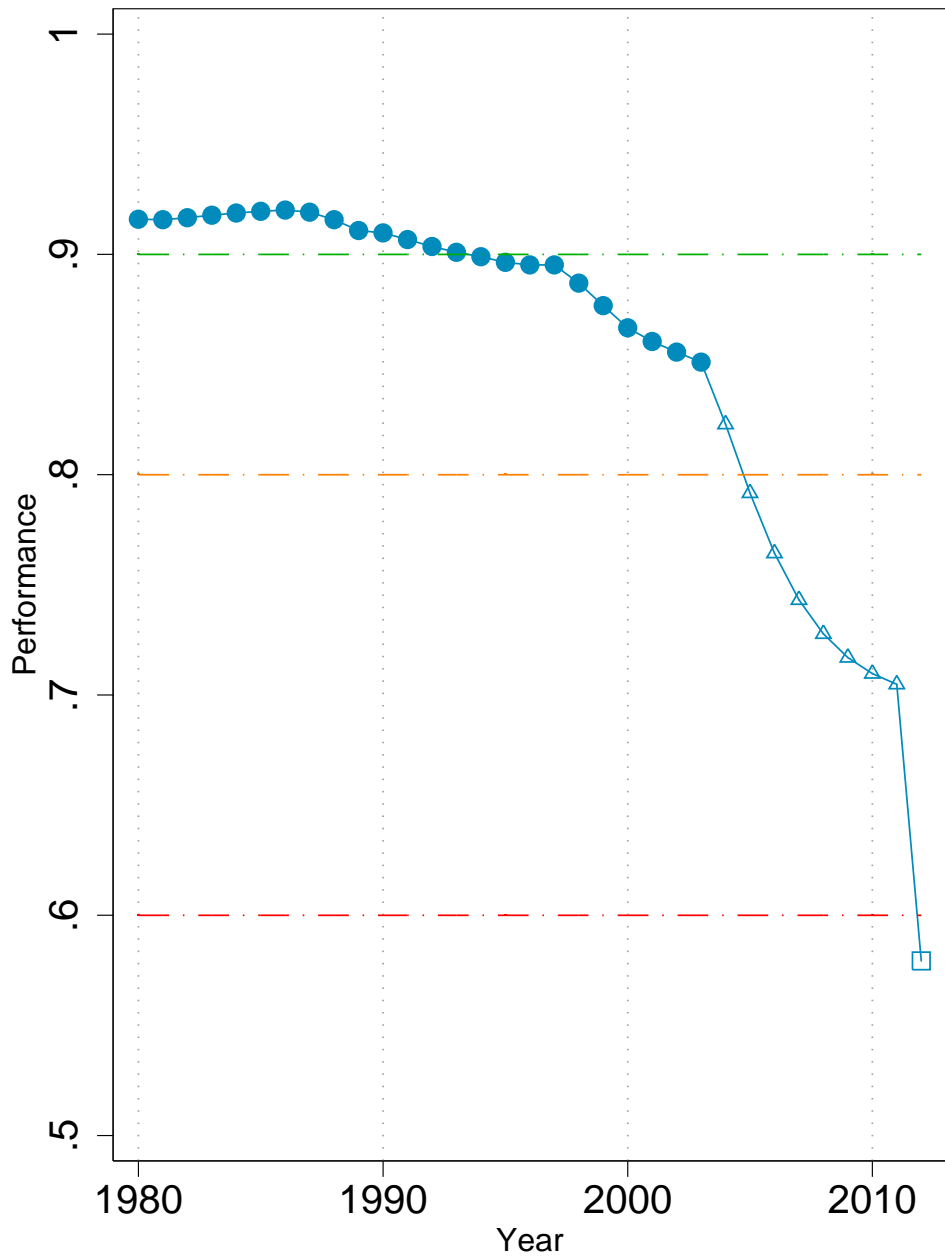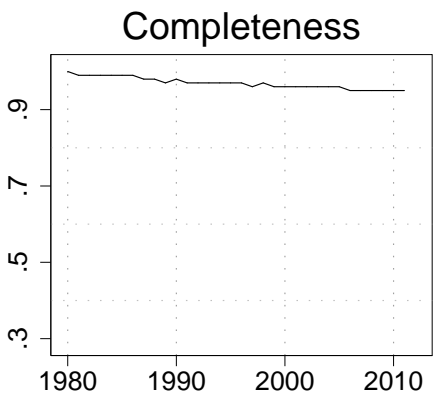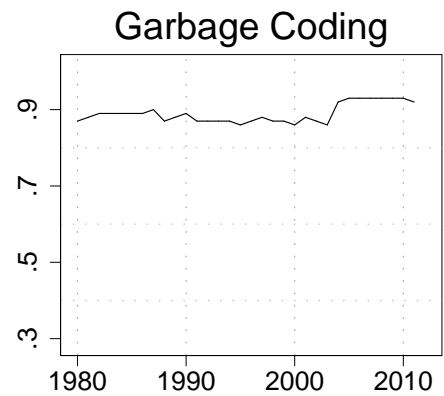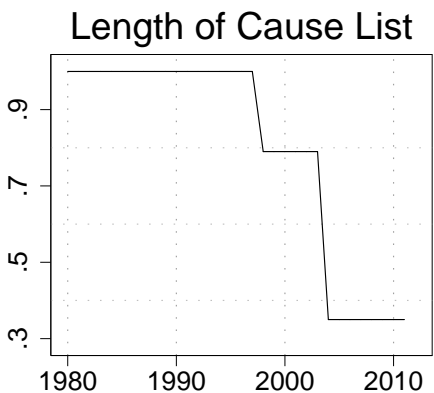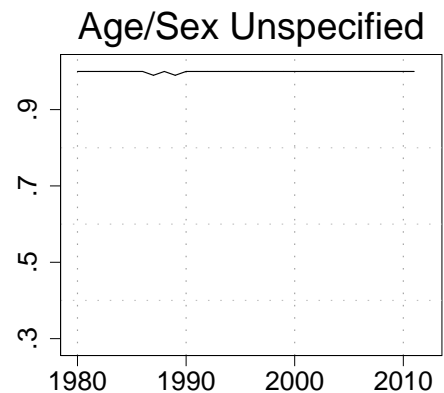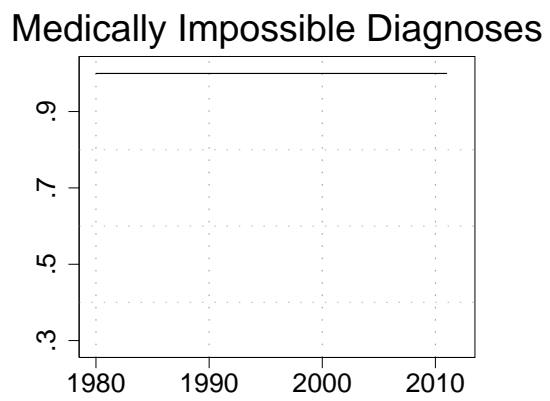

Indicators on their Original (Unweighted) Scale and Subtracted from One Where Necessary so Higher Scores are Preferable to Lower

# Slovakia

## VS Performance Index

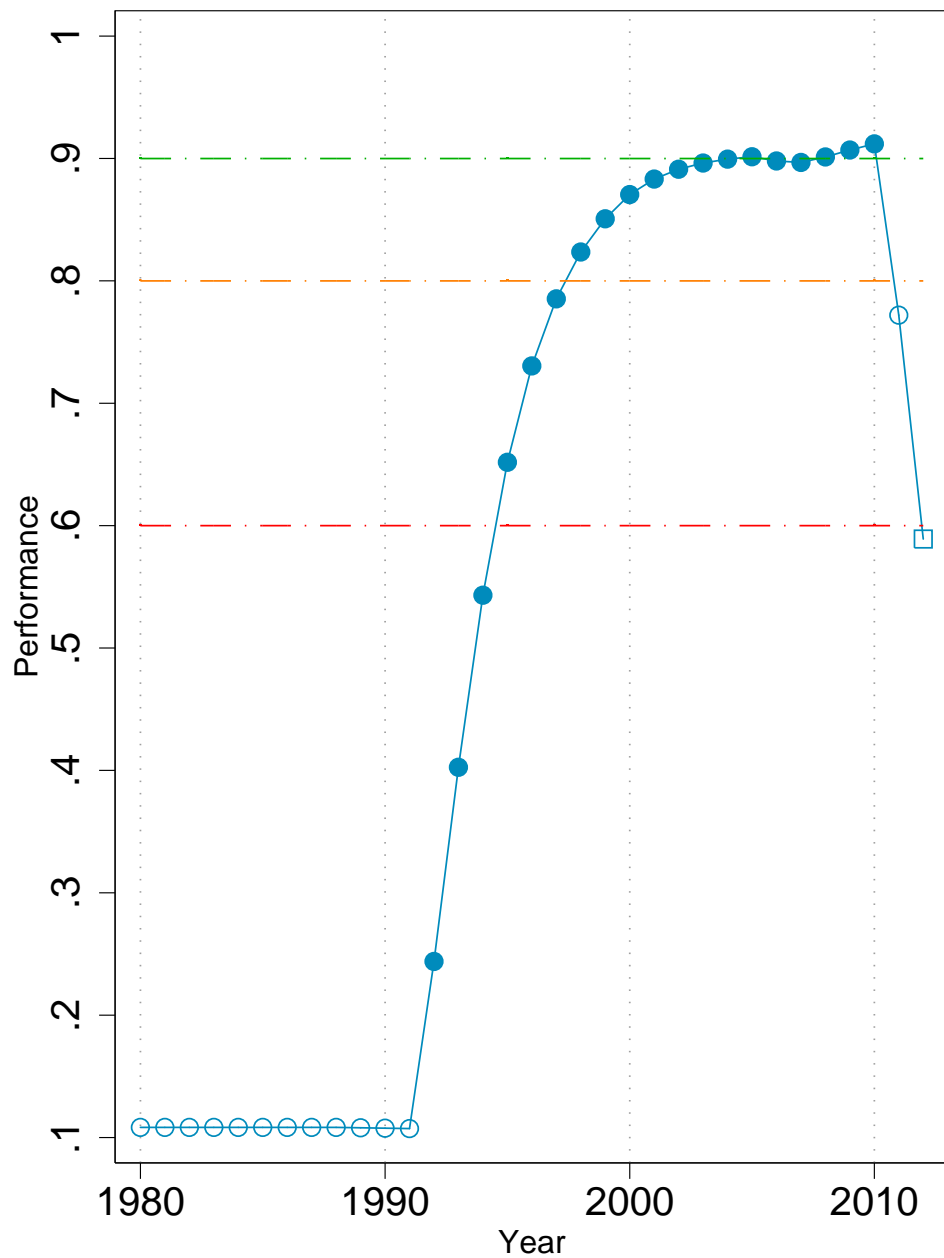

### Completeness

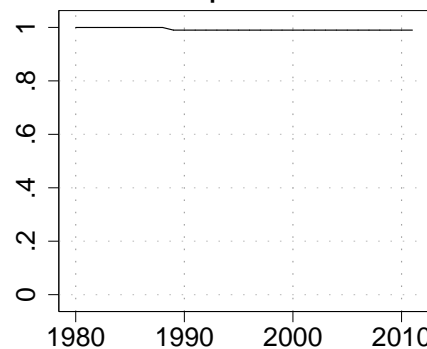

### Garbage Coding

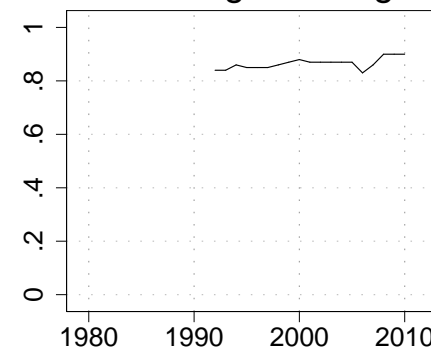

### Length of Cause List

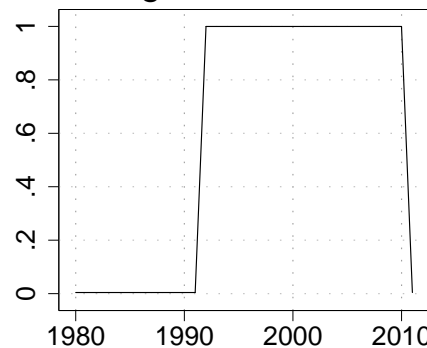

### Age/Sex Unspecified

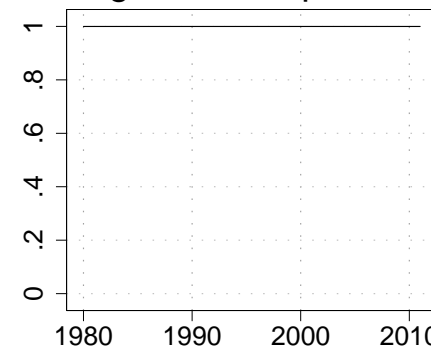

### Medically Impossible Diagnoses

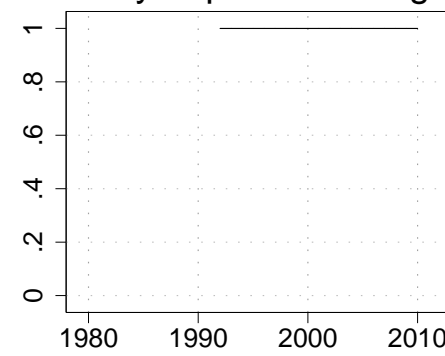

Indicators on their Original (Unweighted) Scale and Subtracted from One Where Necessary so Higher Scores are Preferable to Lower

# Slovenia

## VS Performance Index

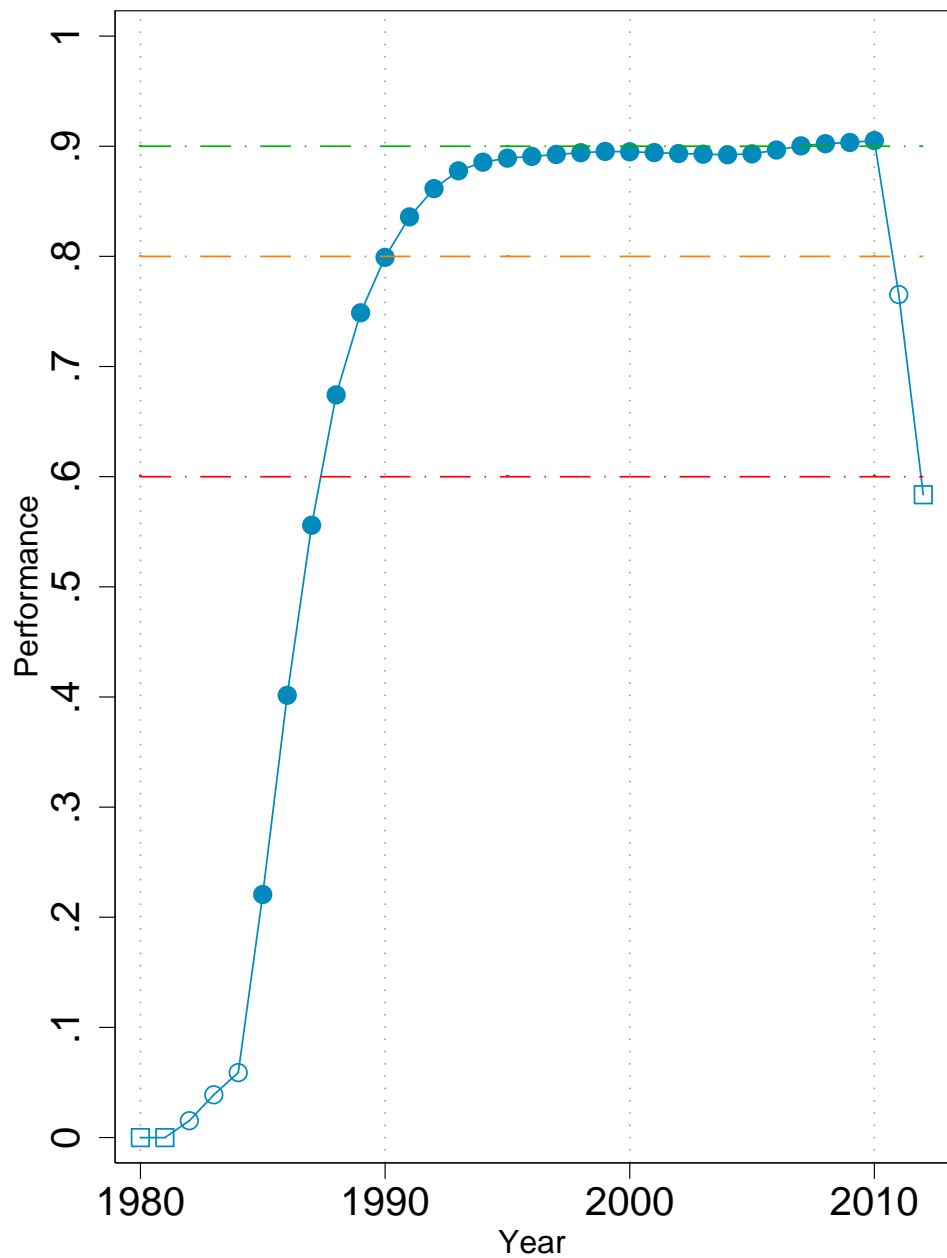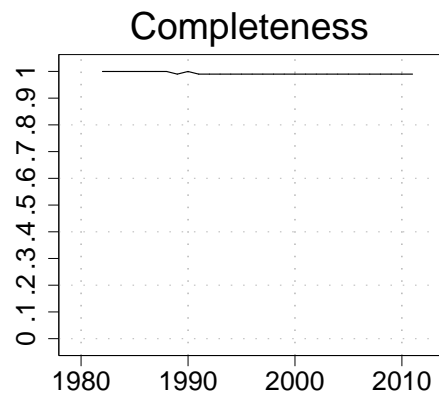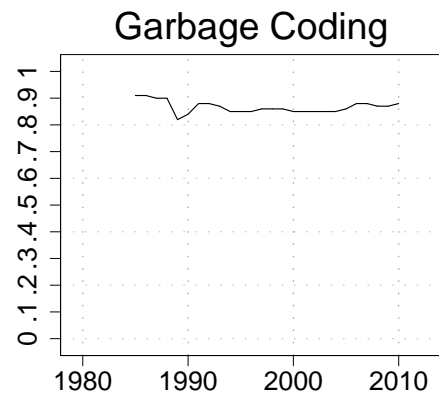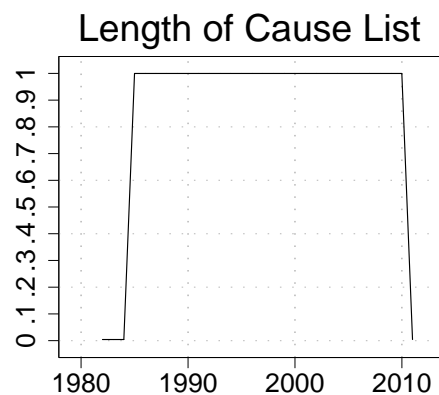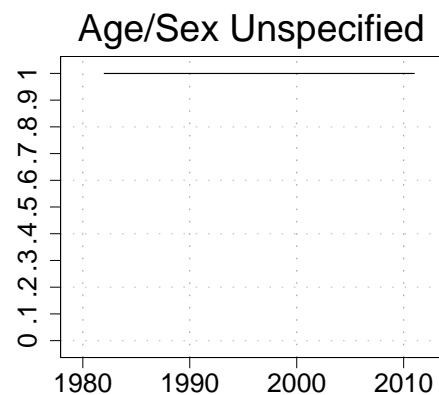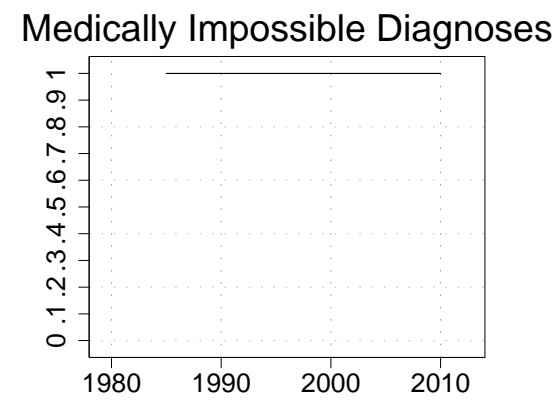

Indicators on their Original (Unweighted) Scale and Subtracted from One Where Necessary so Higher Scores are Preferable to Lower

# South Africa

## VS Performance Index

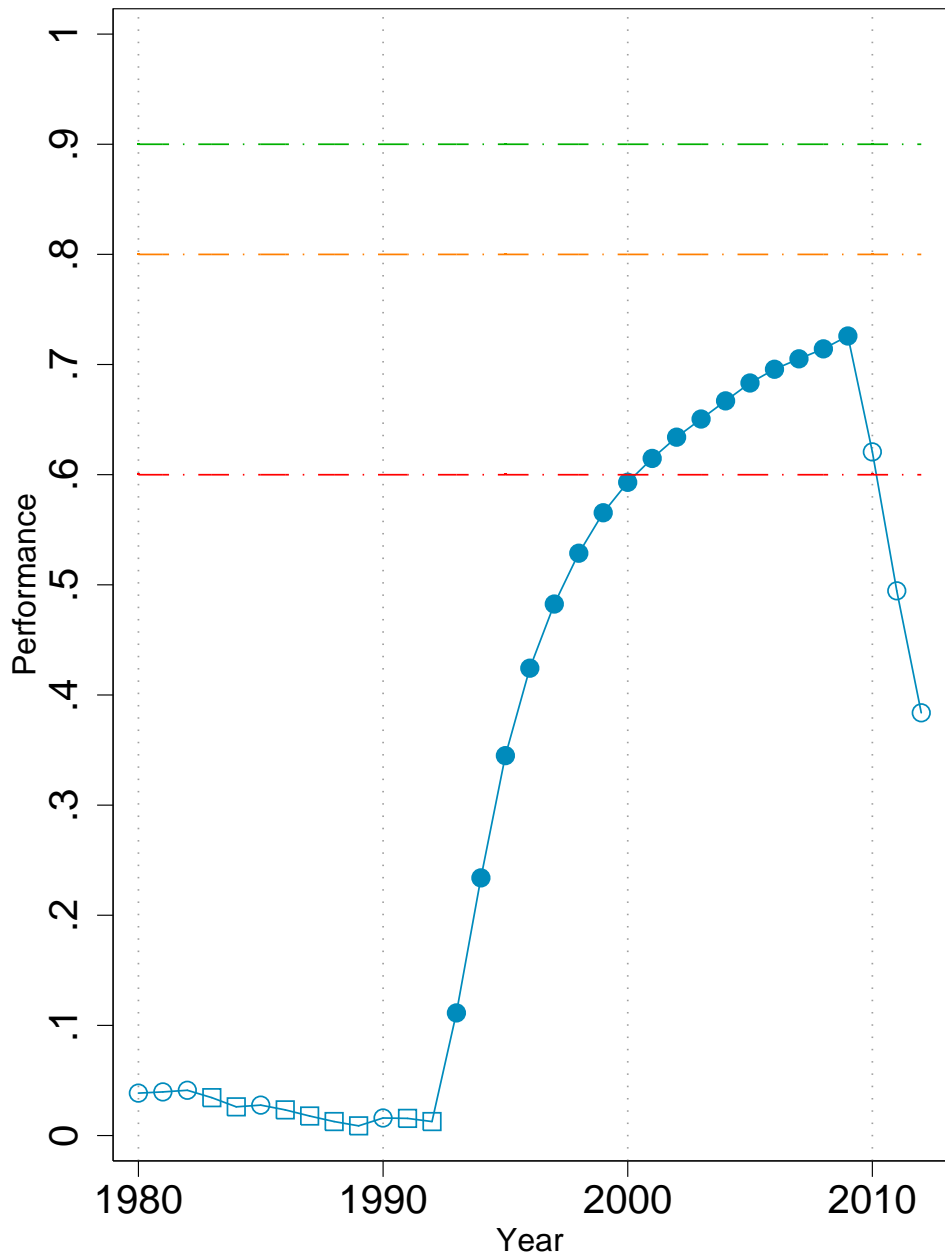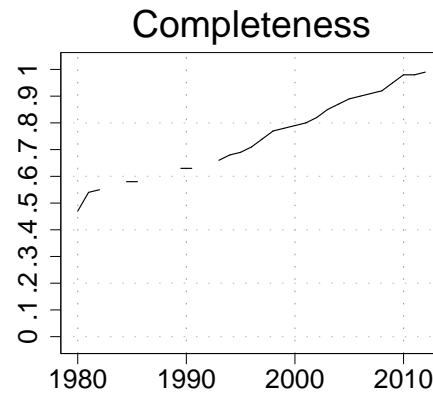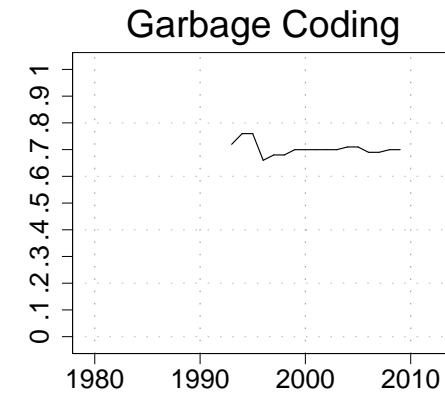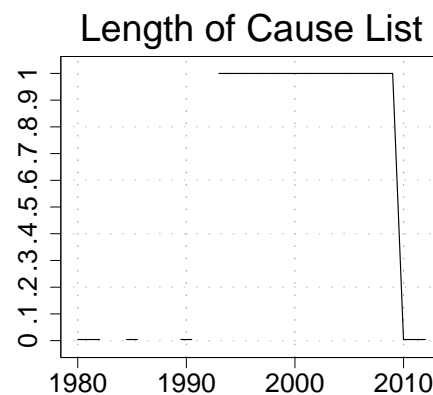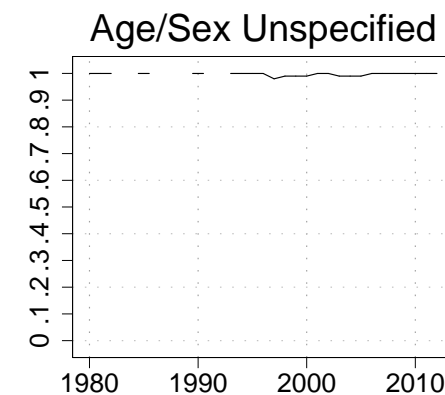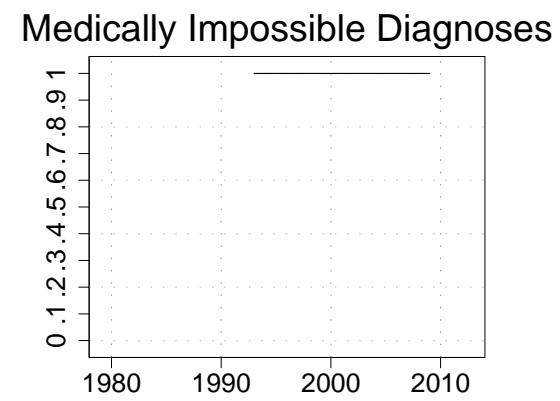

Indicators on their Original (Unweighted) Scale and Subtracted from One Where Necessary so Higher Scores are Preferable to Lower

# South Korea

## VS Performance Index

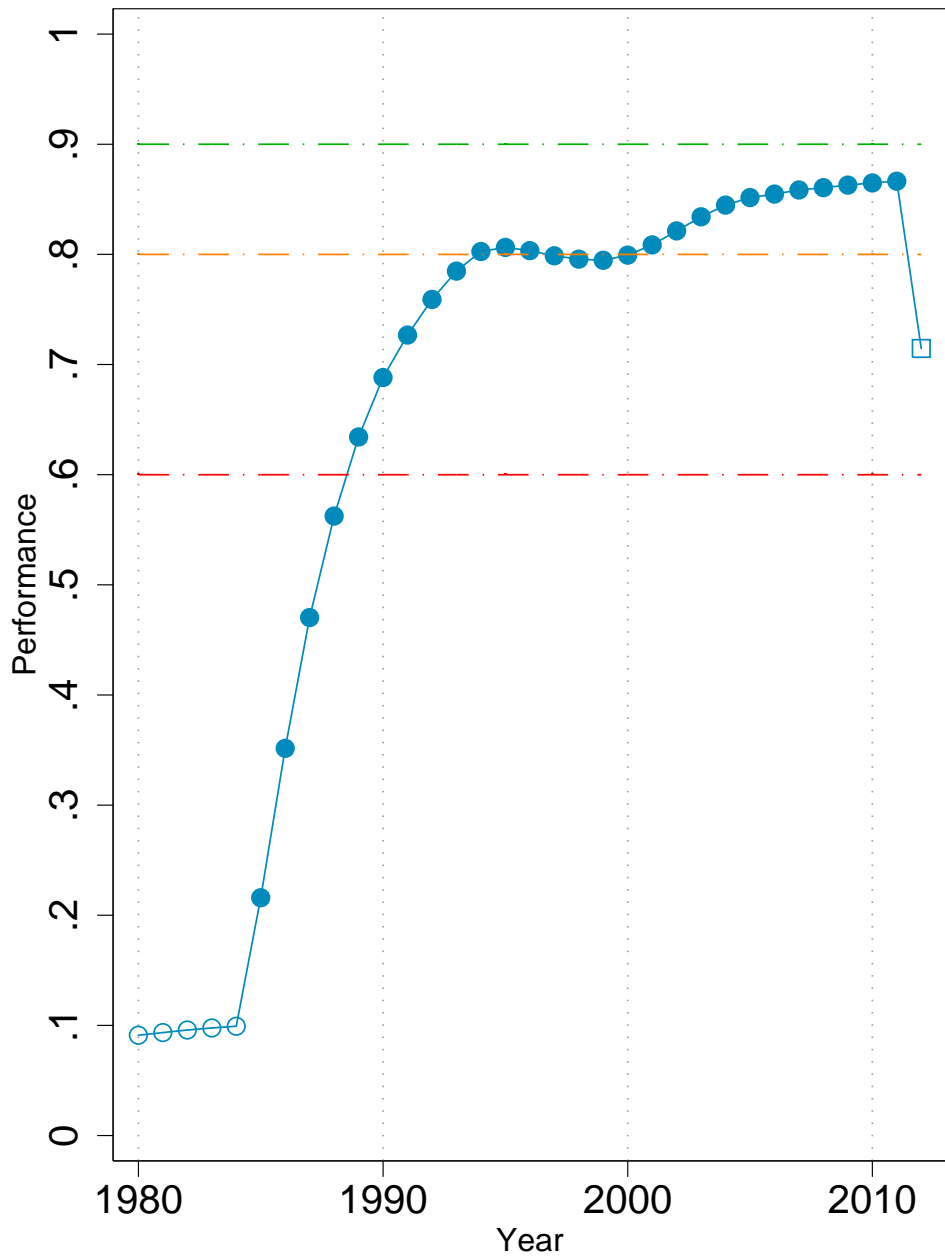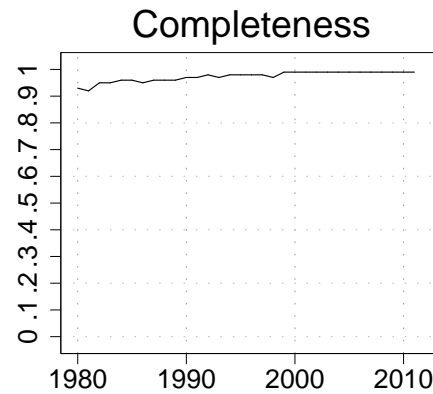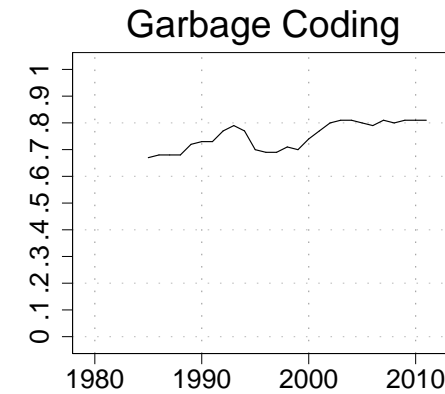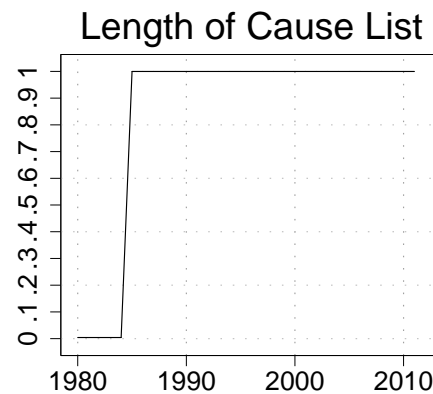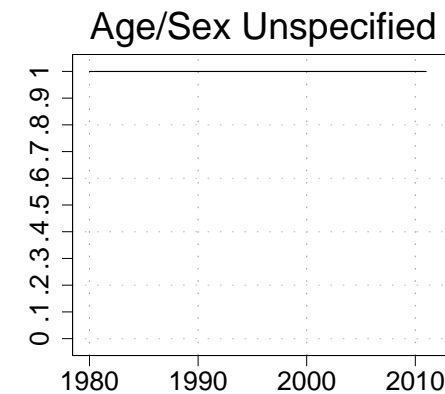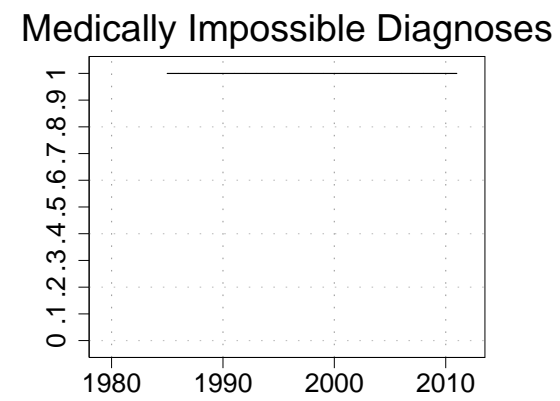

Indicators on their Original (Unweighted) Scale and Subtracted from One Where Necessary so Higher Scores are Preferable to Lower

# Spain

## VS Performance Index

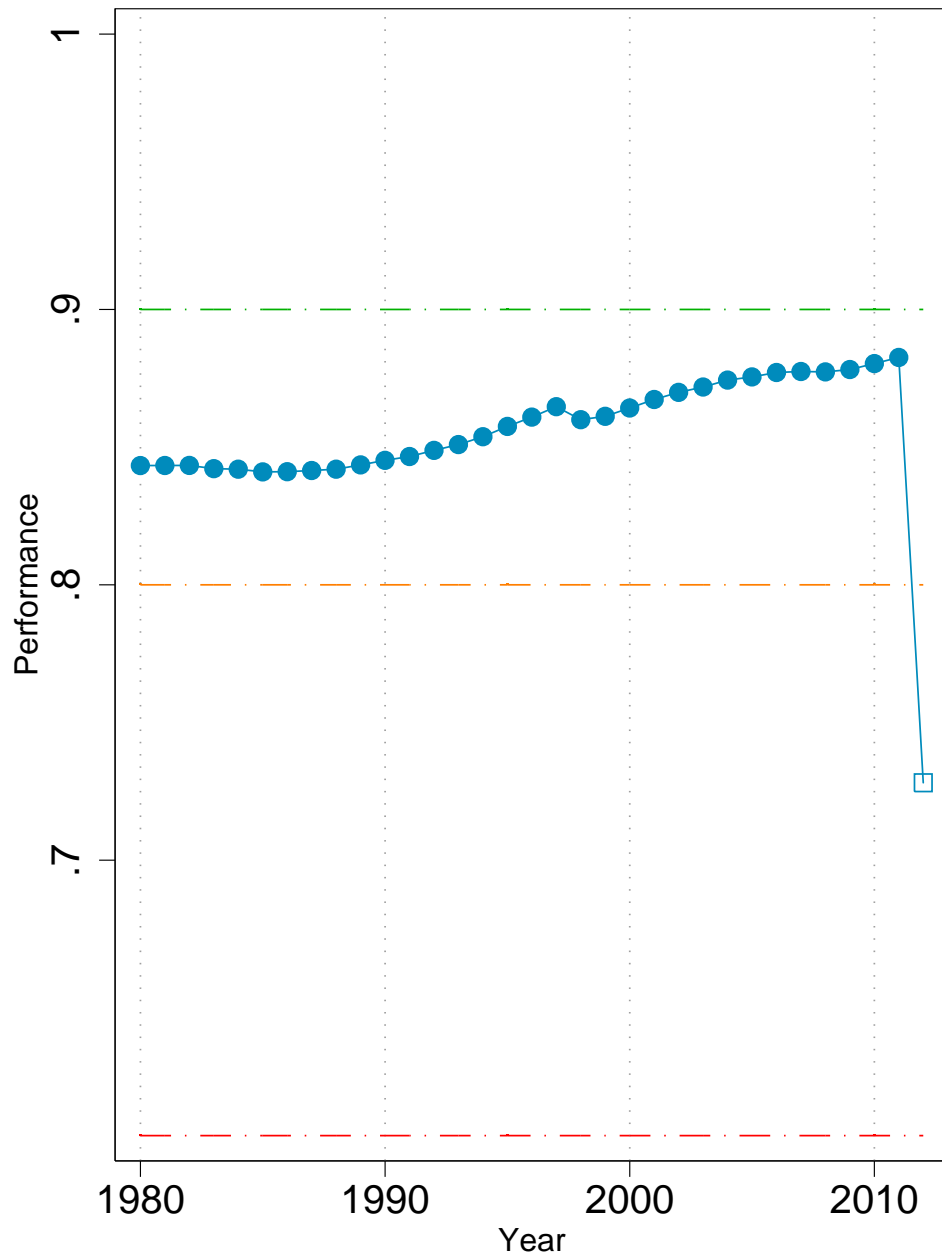

### Completeness

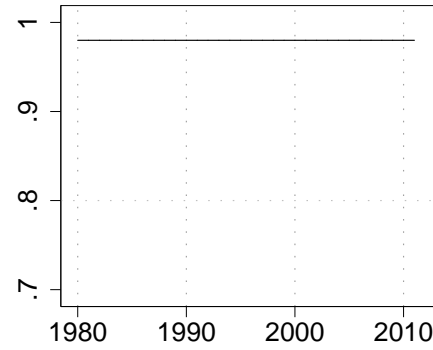

### Garbage Coding

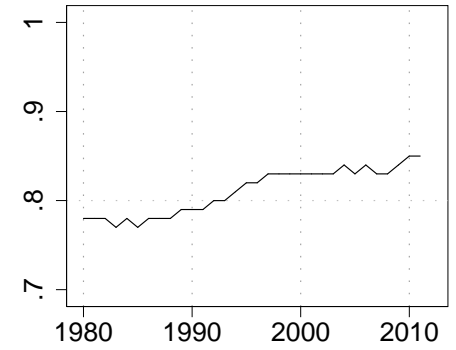

### Length of Cause List

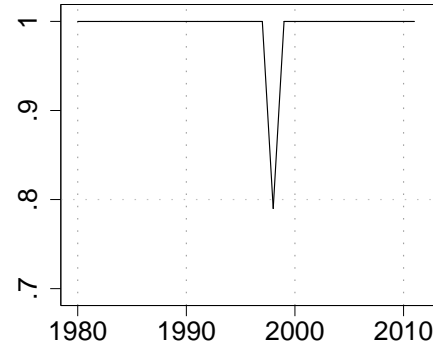

### Age/Sex Unspecified

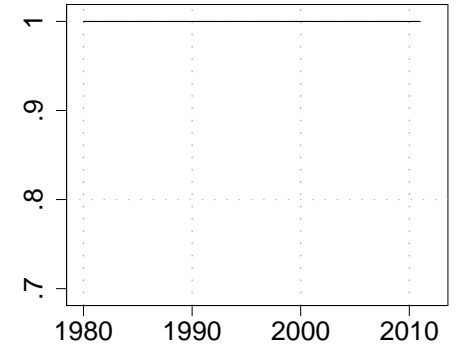

### Medically Impossible Diagnoses

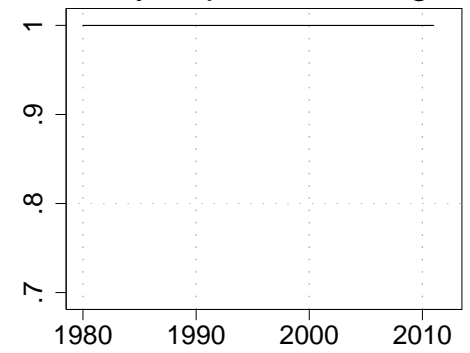

Indicators on their Original (Unweighted) Scale  
and Subtracted from One Where Necessary so Higher Scores are Preferable to Lower



# Sri Lanka

## VS Performance Index

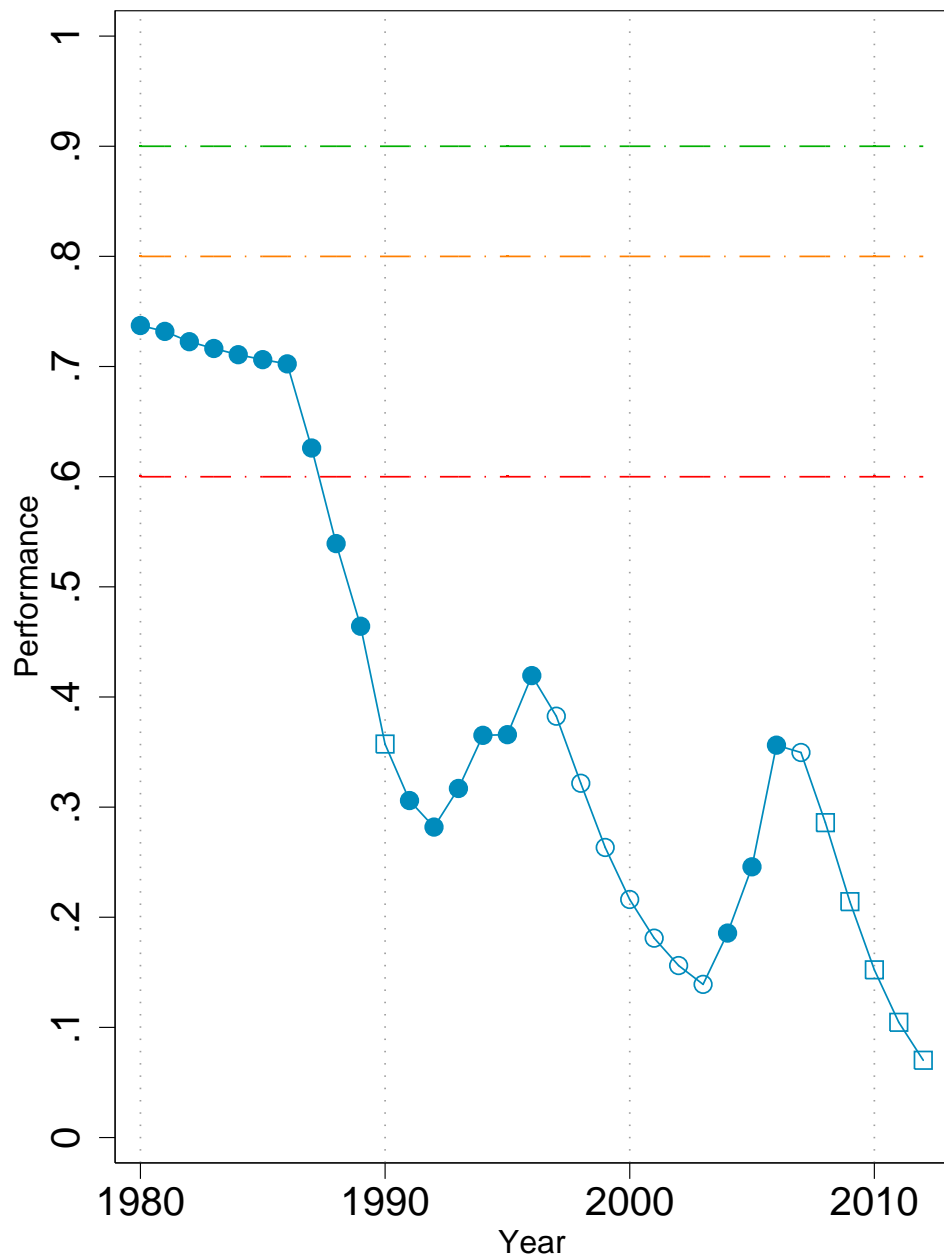

### Completeness

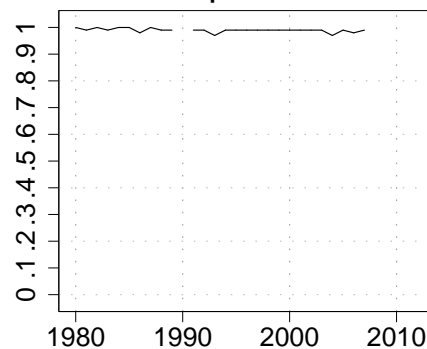

### Garbage Coding

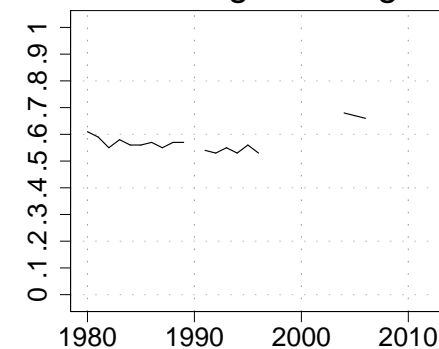

### Length of Cause List

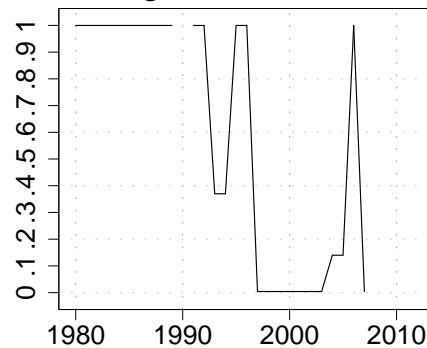

### Age/Sex Unspecified

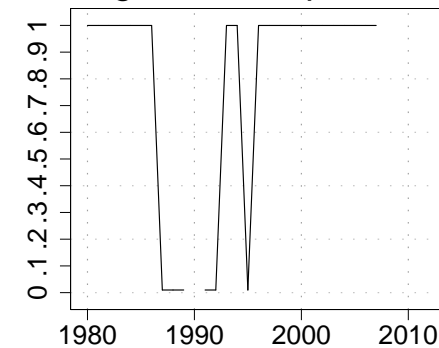

### Medically Impossible Diagnoses

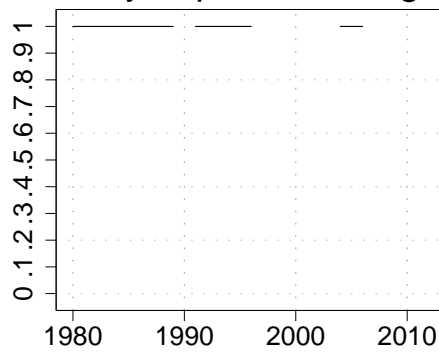

Indicators on their Original (Unweighted) Scale and Subtracted from One Where Necessary so Higher Scores are Preferable to Lower

# Suriname

## VS Performance Index

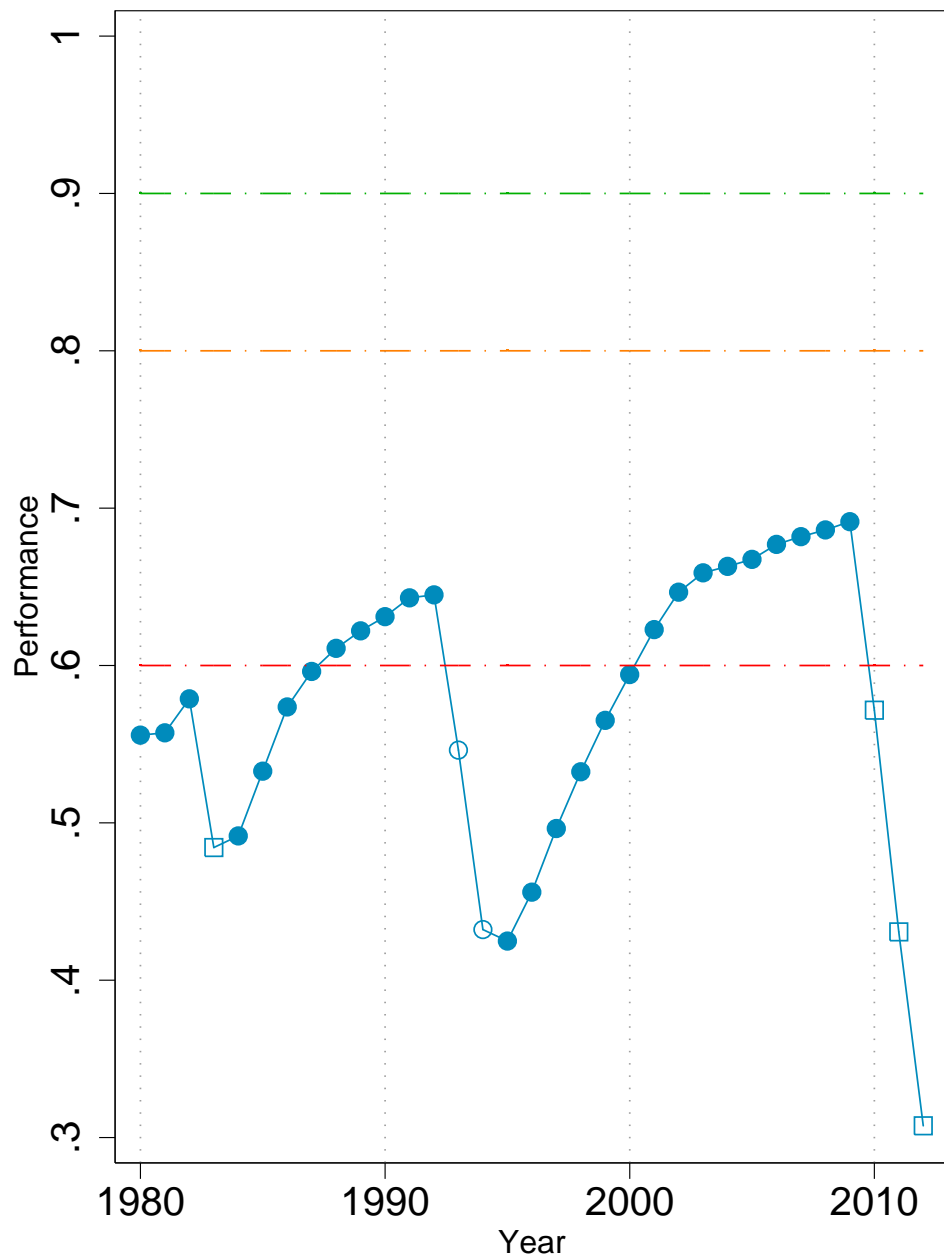

### Completeness

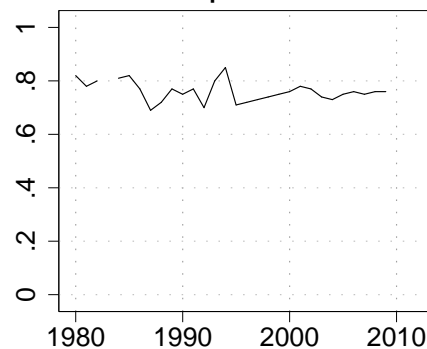

### Garbage Coding

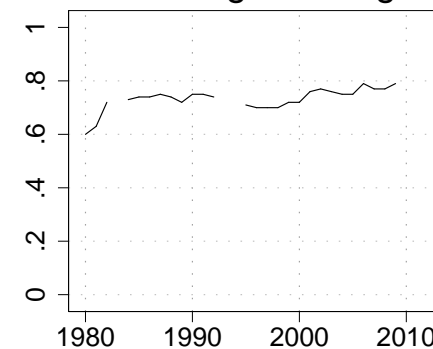

### Length of Cause List

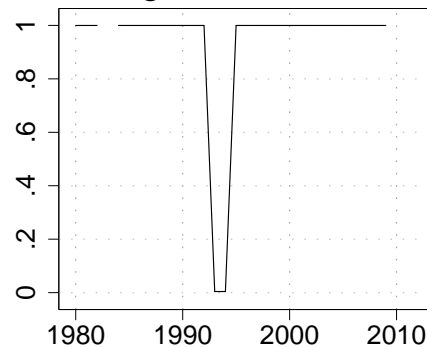

### Age/Sex Unspecified

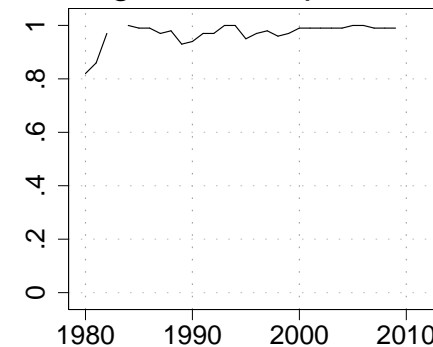

### Medically Impossible Diagnoses

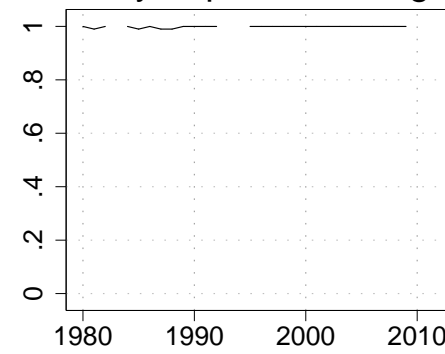

Indicators on their Original (Unweighted) Scale and Subtracted from One Where Necessary so Higher Scores are Preferable to Lower

# Sweden

## VS Performance Index

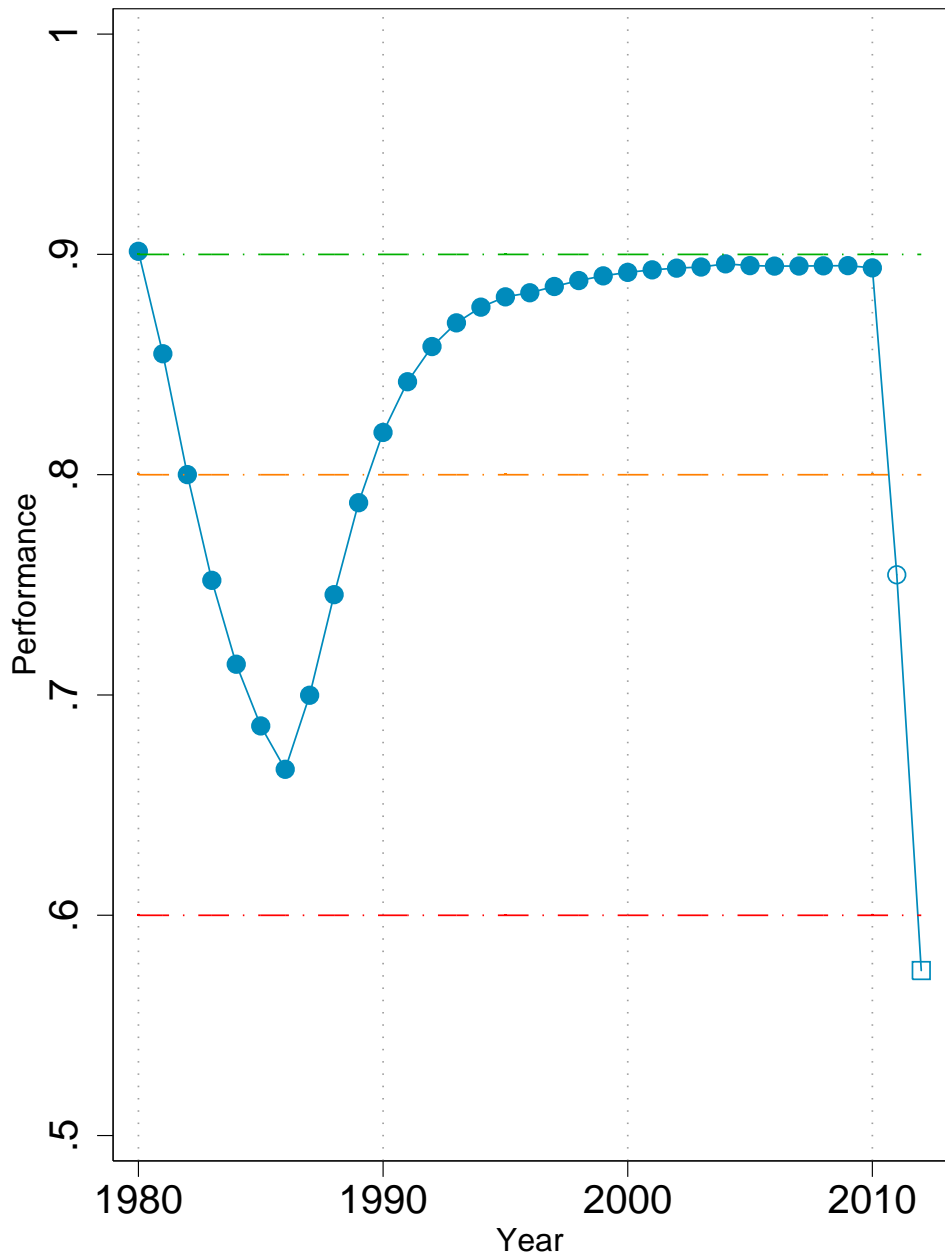

### Completeness

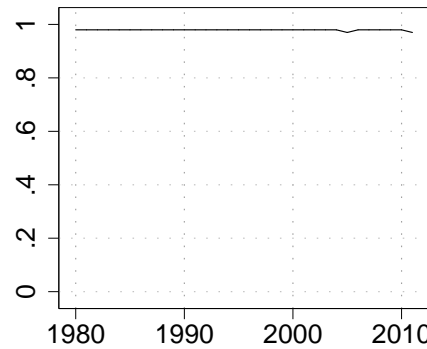

### Garbage Coding

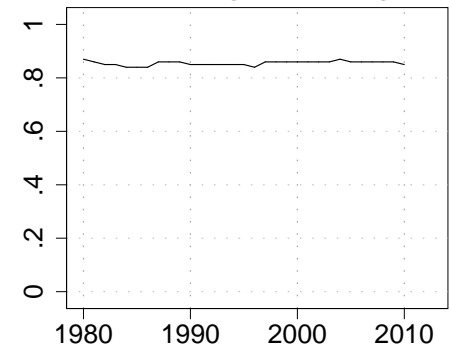

### Length of Cause List

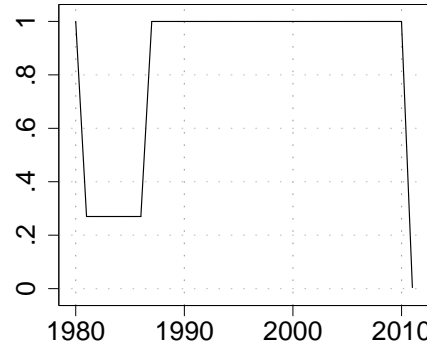

### Age/Sex Unspecified

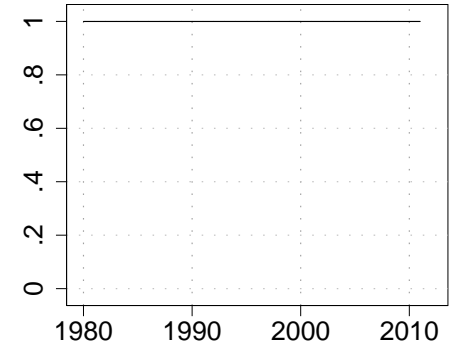

### Medically Impossible Diagnoses

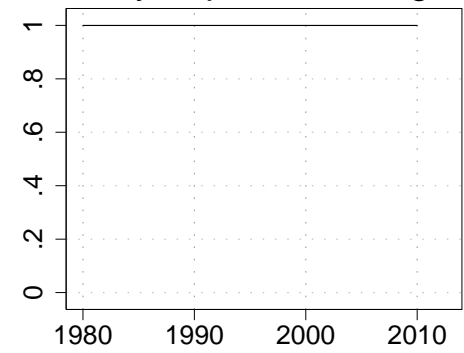

Indicators on their Original (Unweighted) Scale and Subtracted from One Where Necessary so Higher Scores are Preferable to Lower

# Switzerland

## VS Performance Index

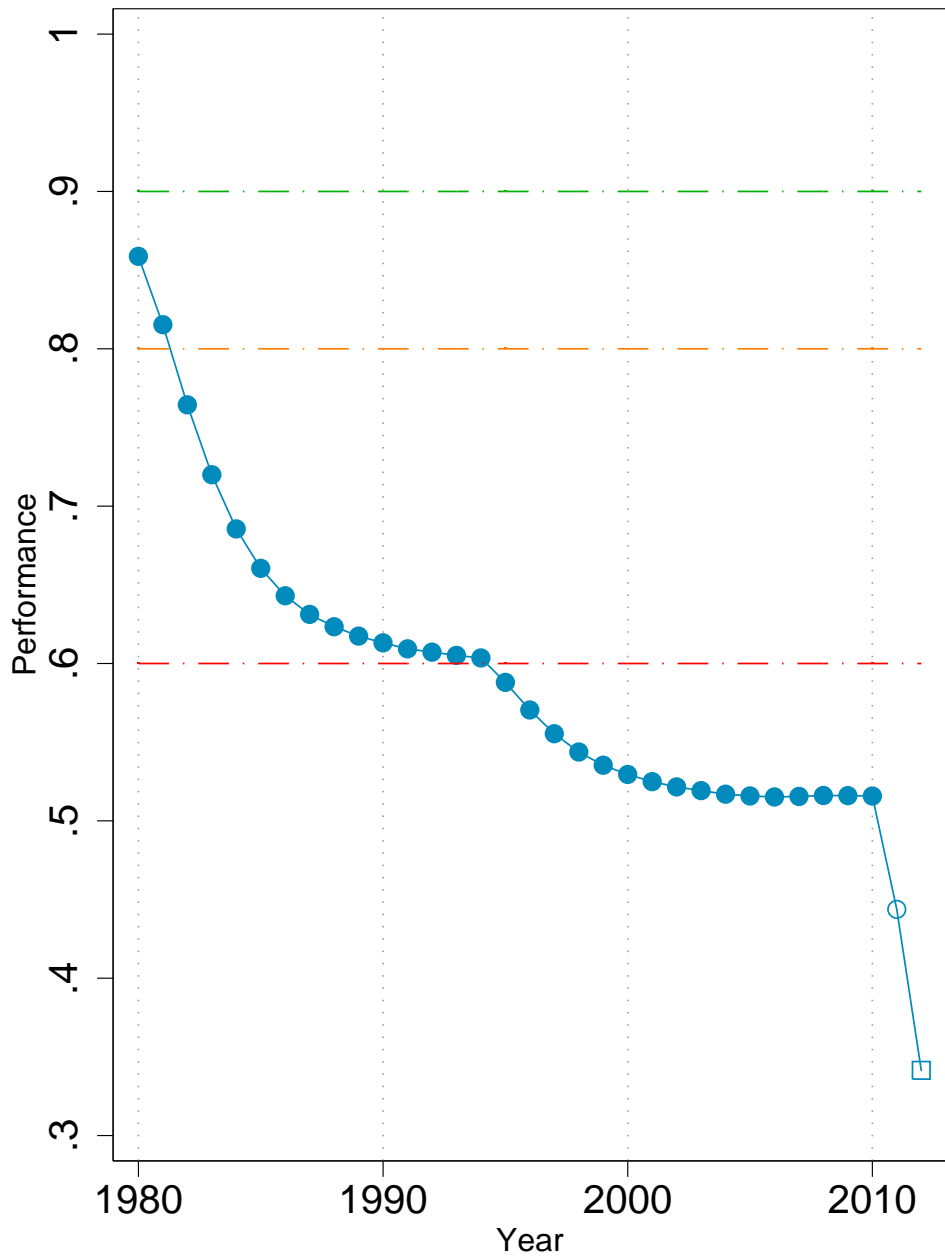

### Completeness

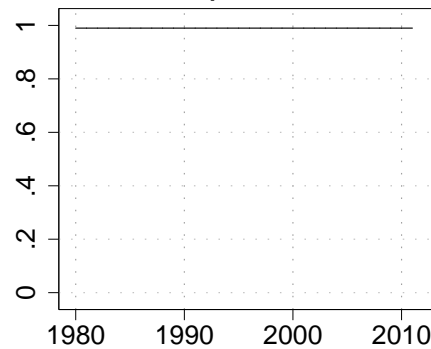

### Garbage Coding

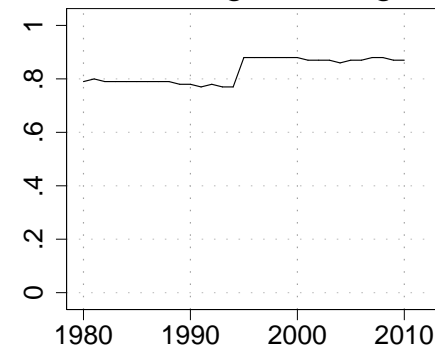

### Length of Cause List

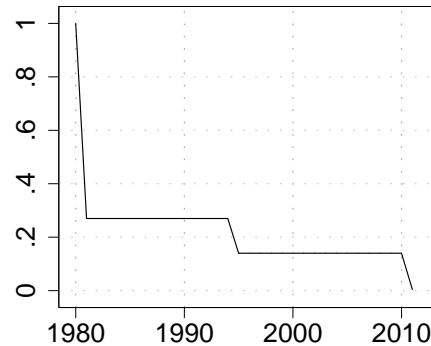

### Age/Sex Unspecified

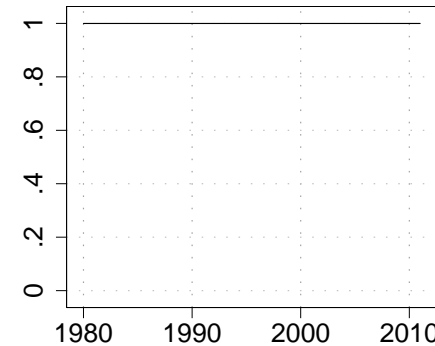

### Medically Impossible Diagnoses

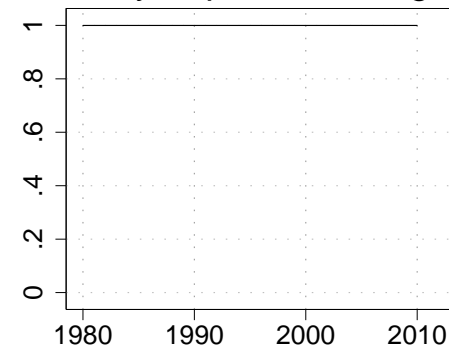

Indicators on their Original (Unweighted) Scale and Subtracted from One Where Necessary so Higher Scores are Preferable to Lower

# Syria

## VS Performance Index

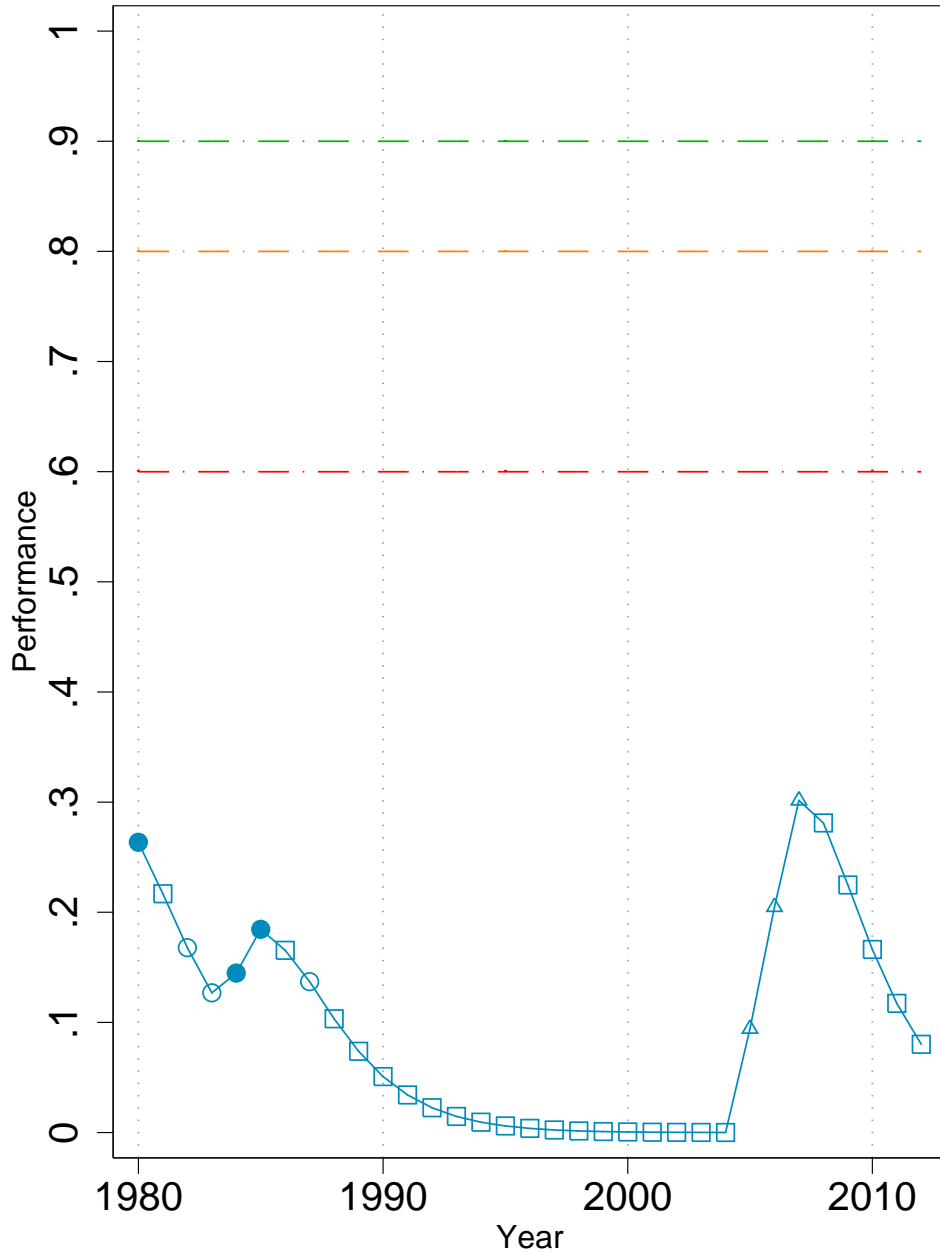

### Completeness

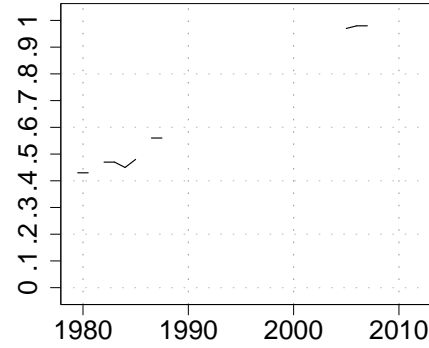

### Garbage Coding

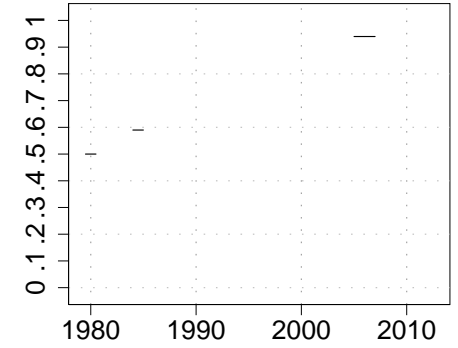

### Length of Cause List

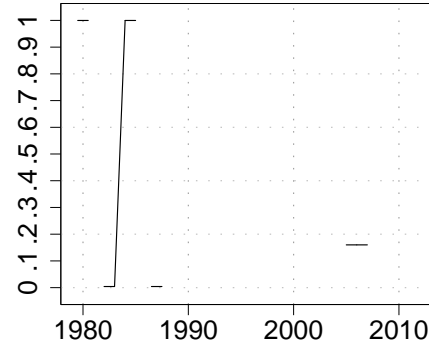

### Age/Sex Unspecified

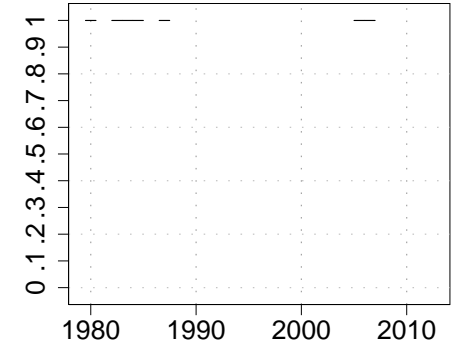

### Medically Impossible Diagnoses

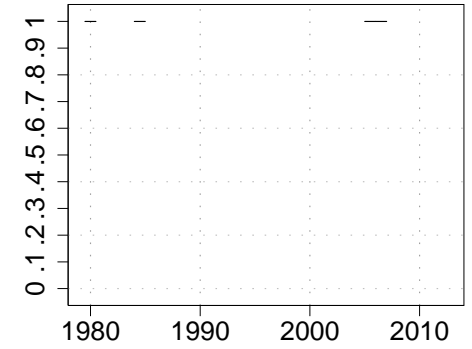

Indicators on their Original (Unweighted) Scale and Subtracted from One Where Necessary so Higher Scores are Preferable to Lower

# Taiwan

## VS Performance Index

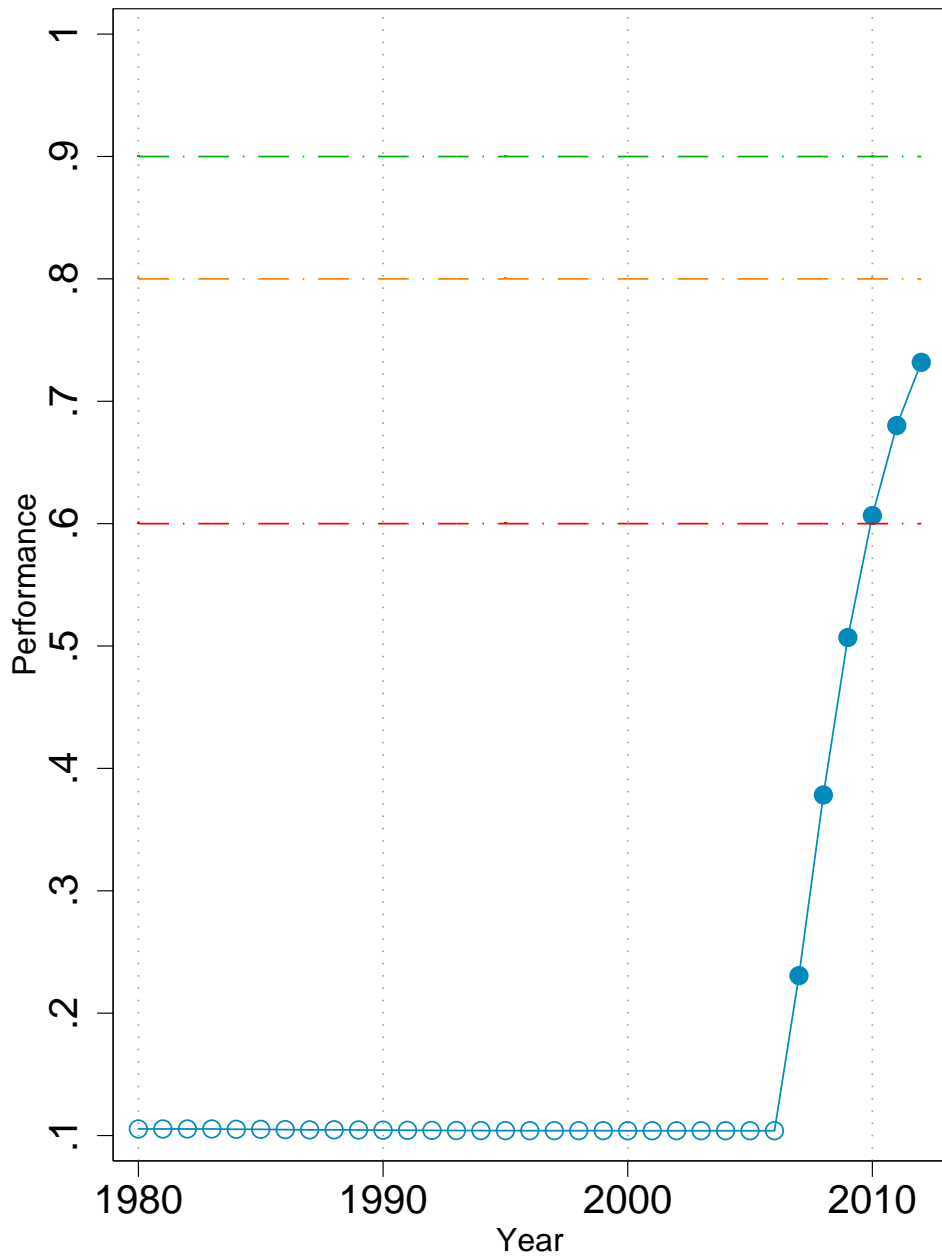

### Completeness

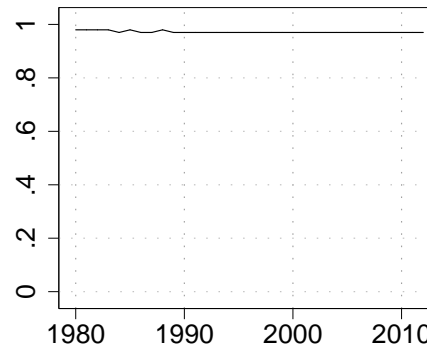

### Garbage Coding

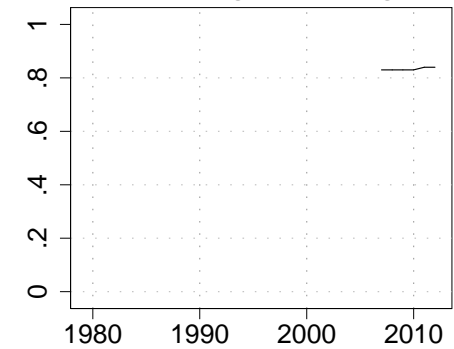

### Length of Cause List

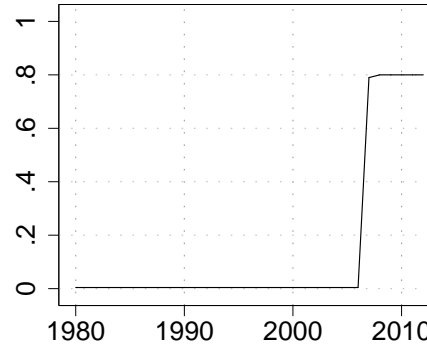

### Age/Sex Unspecified

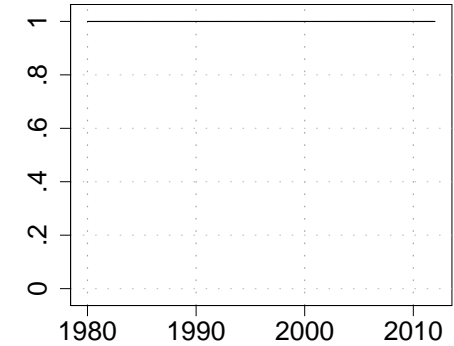

### Medically Impossible Diagnoses

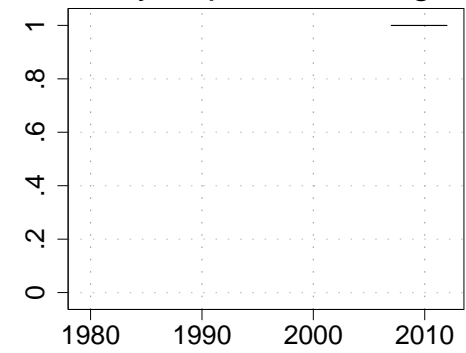

Indicators on their Original (Unweighted) Scale and Subtracted from One Where Necessary so Higher Scores are Preferable to Lower

# Tajikistan

## VS Performance Index

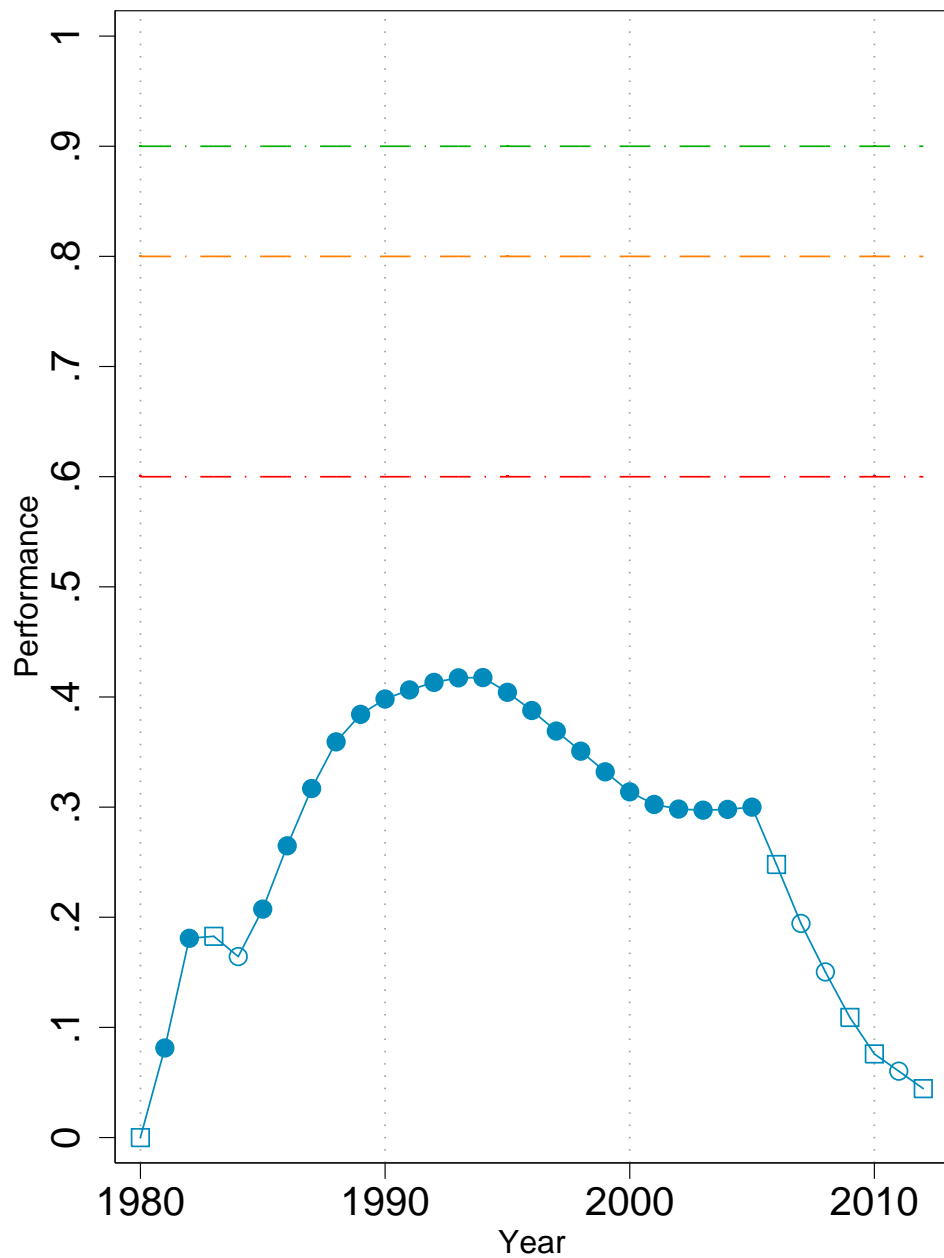

### Completeness

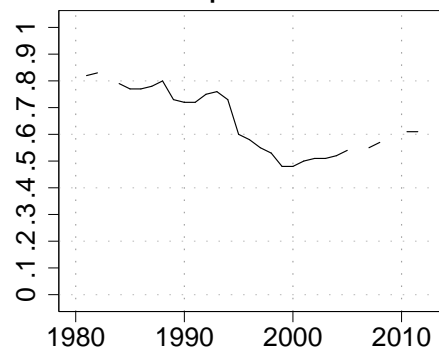

### Garbage Coding

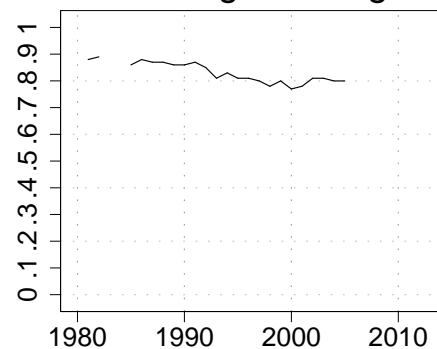

### Length of Cause List

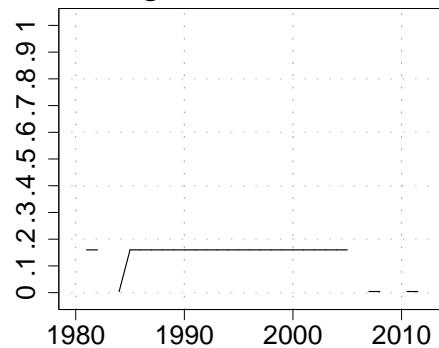

### Age/Sex Unspecified

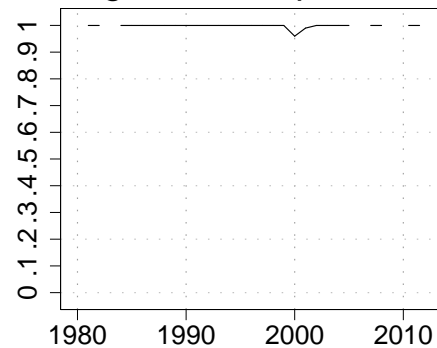

### Medically Impossible Diagnoses

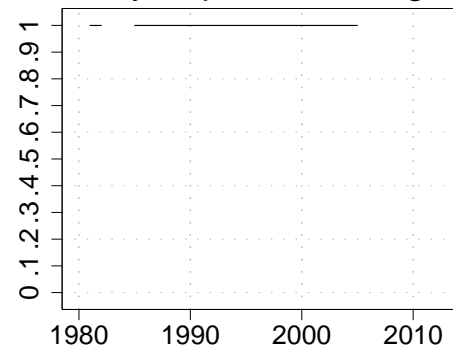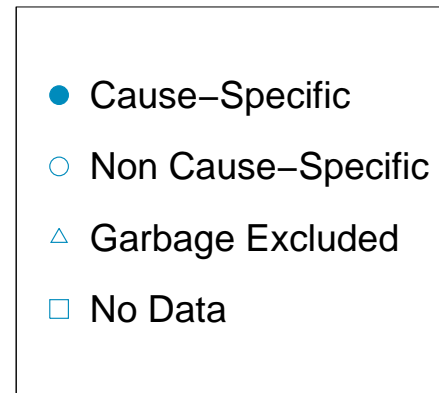

Indicators on their Original (Unweighted) Scale and Subtracted from One Where Necessary so Higher Scores are Preferable to Lower

# Tanzania

## VS Performance Index

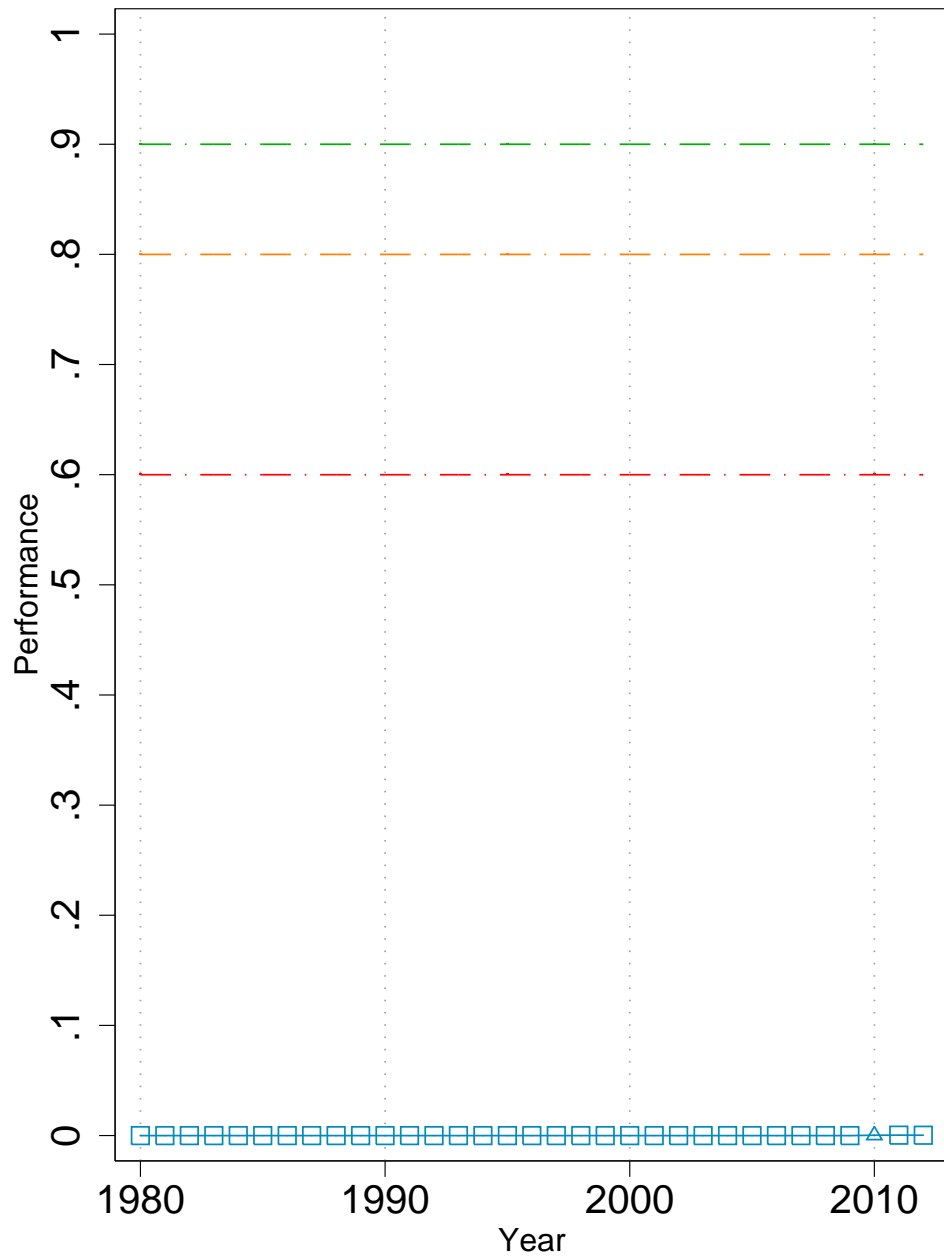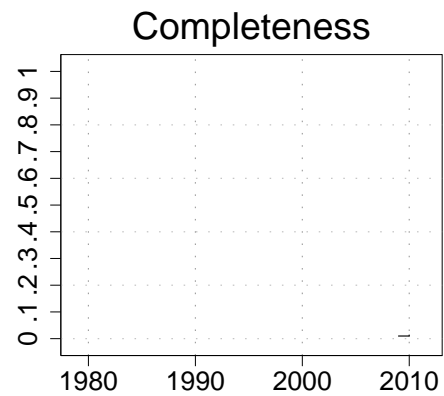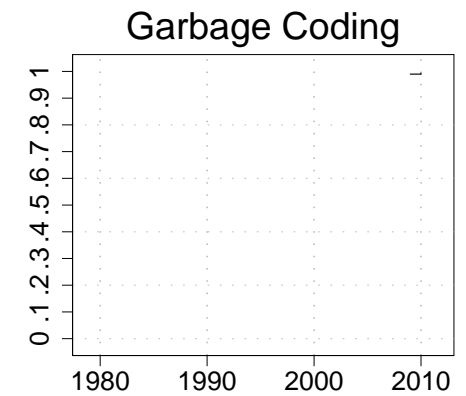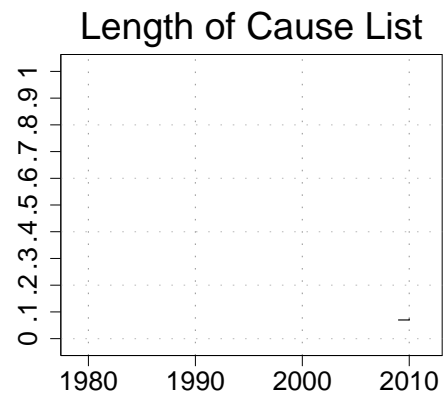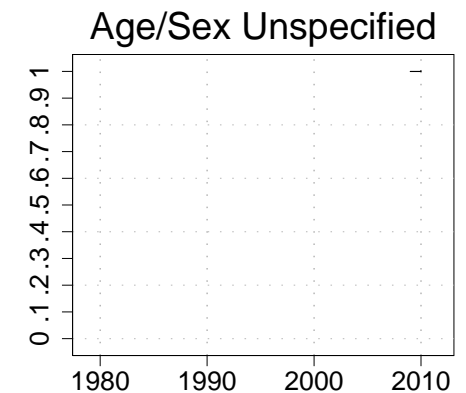

Indicators on their Original (Unweighted) Scale and Subtracted from One Where Necessary so Higher Scores are Preferable to Lower



# Thailand

## VS Performance Index

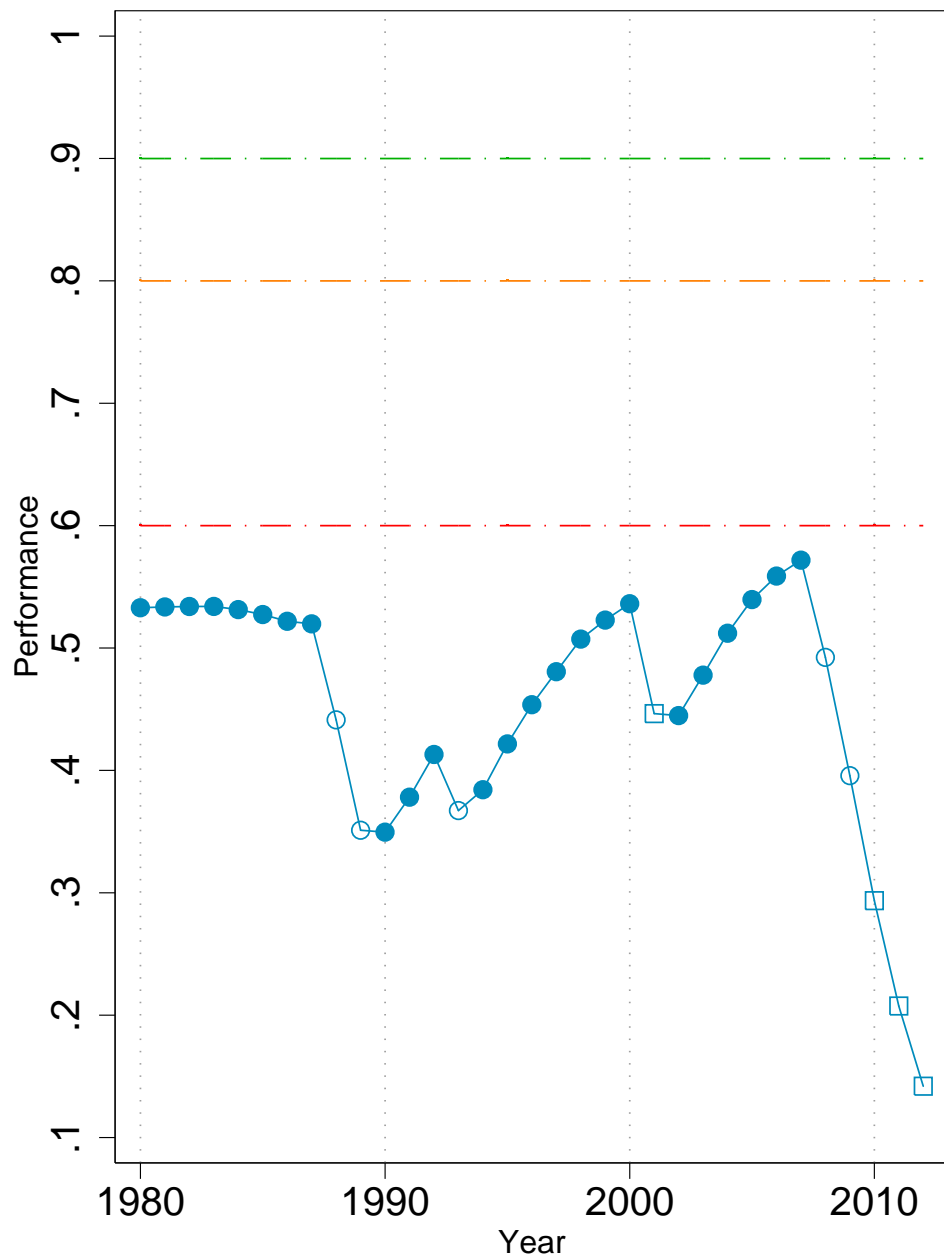

### Completeness

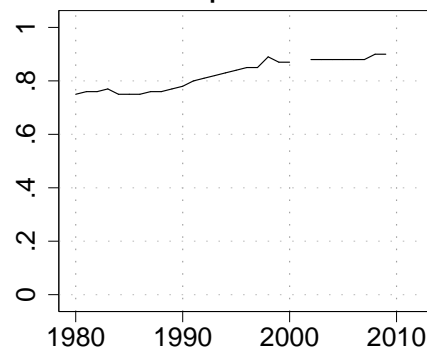

### Garbage Coding

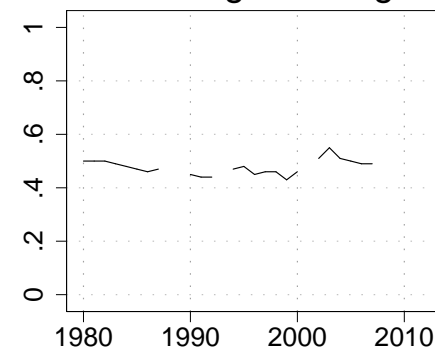

### Length of Cause List

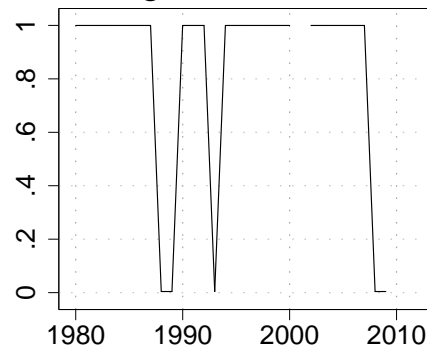

### Age/Sex Unspecified

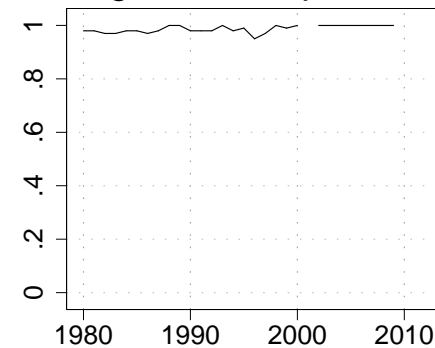

### Medically Impossible Diagnoses

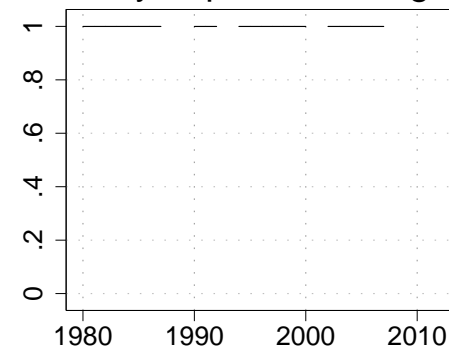

Indicators on their Original (Unweighted) Scale and Subtracted from One Where Necessary so Higher Scores are Preferable to Lower

# Tonga

## VS Performance Index

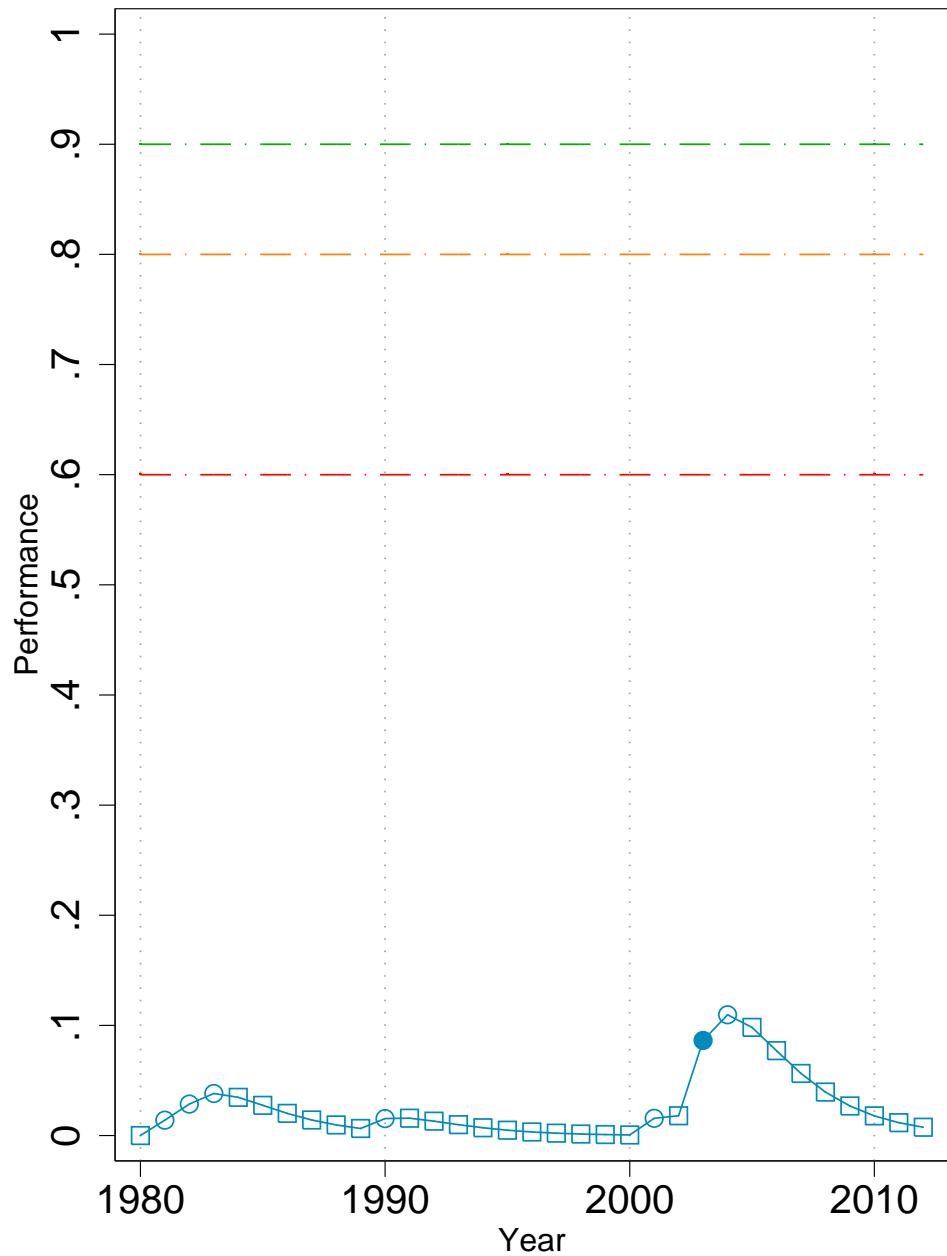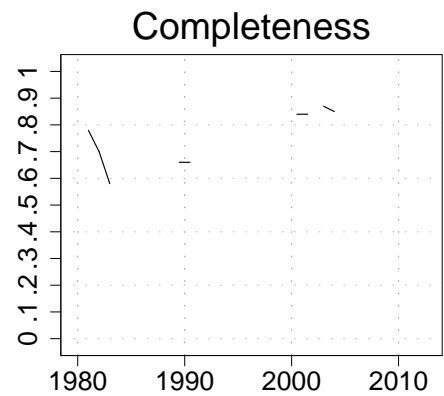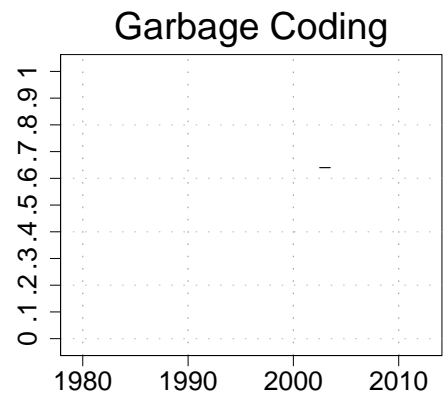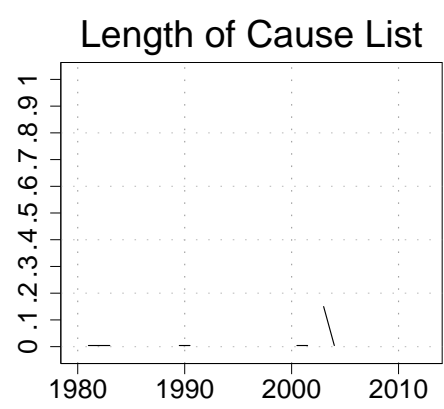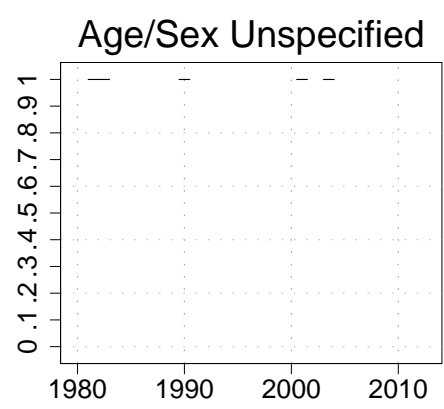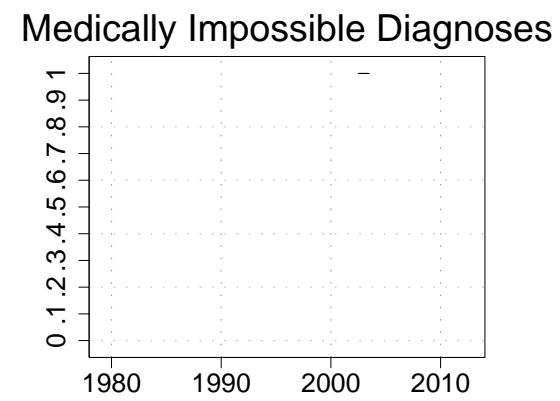

Indicators on their Original (Unweighted) Scale and Subtracted from One Where Necessary so Higher Scores are Preferable to Lower

# Trinidad and Tobago VS Performance Index

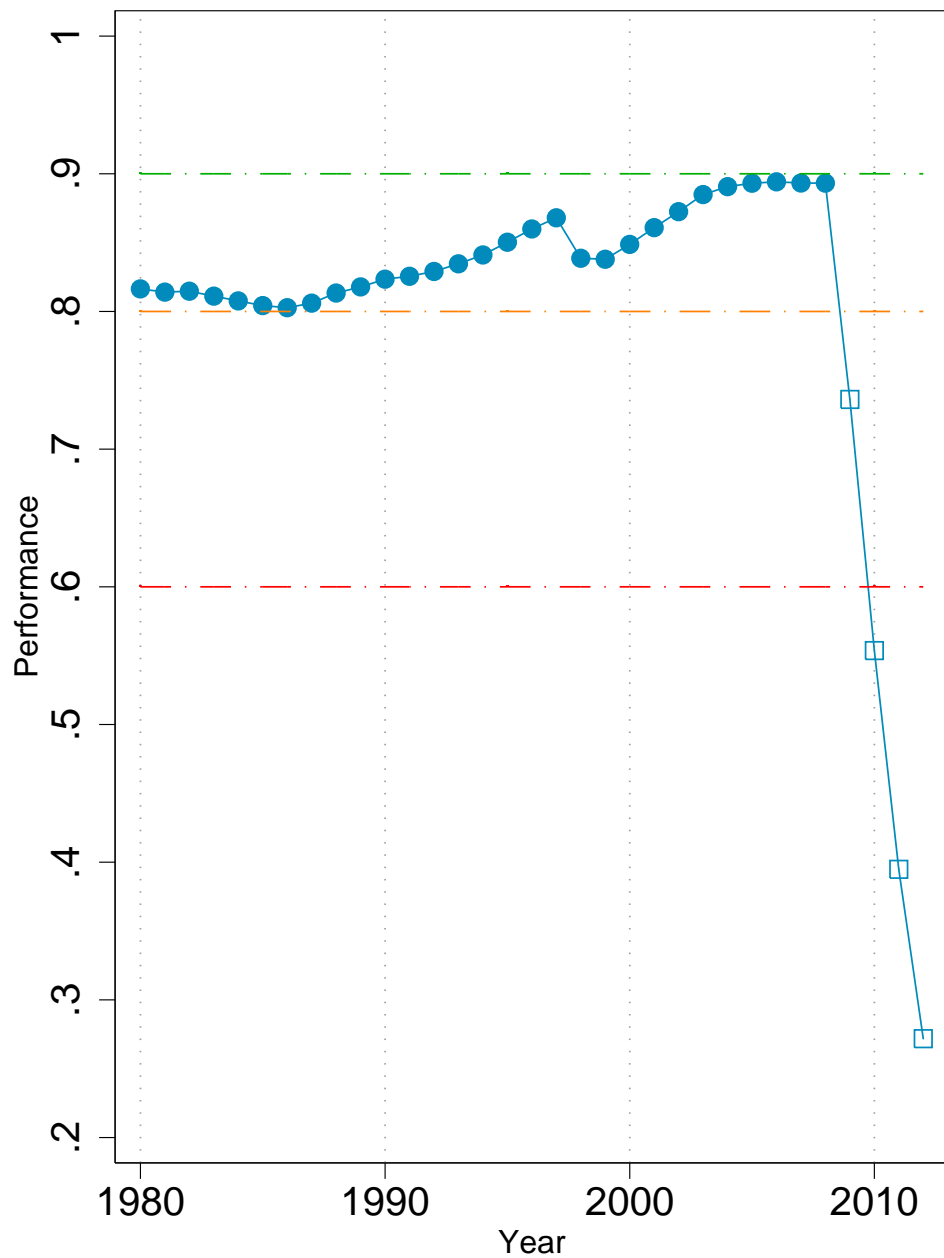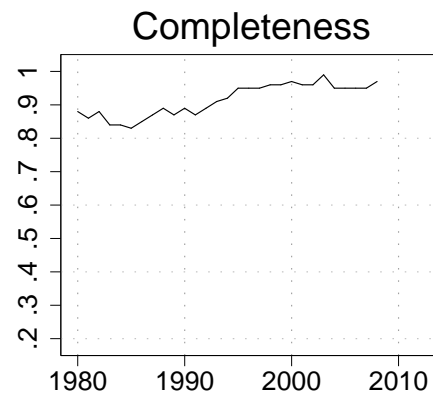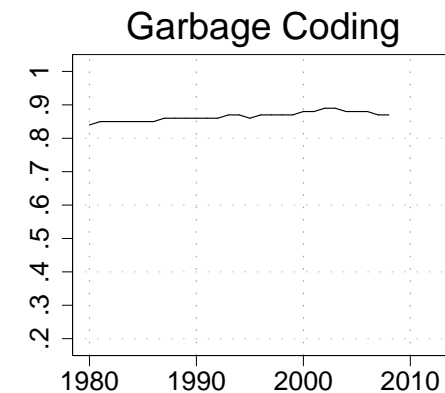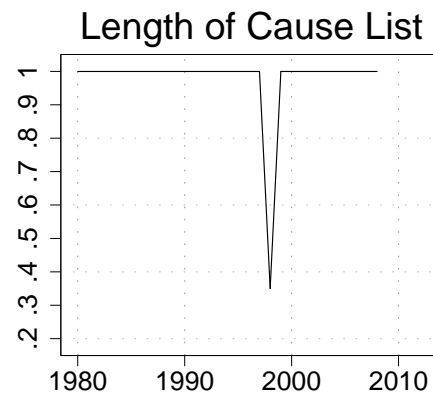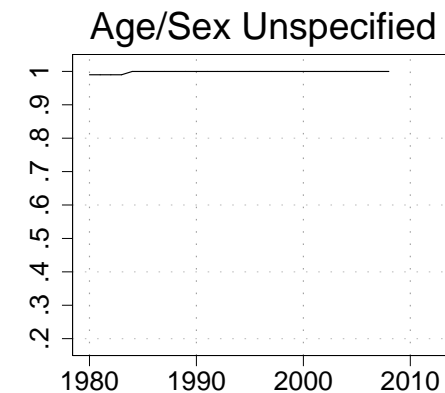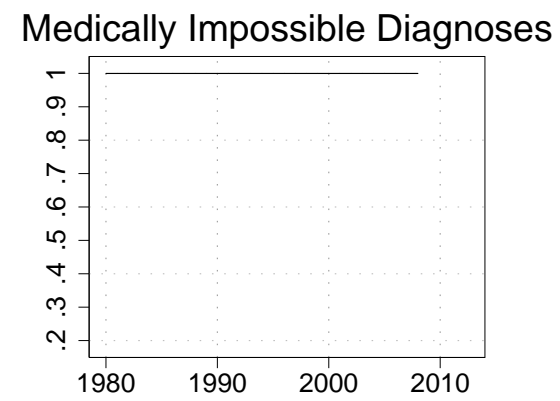

Indicators on their Original (Unweighted) Scale and Subtracted from One Where Necessary so Higher Scores are Preferable to Lower

# Tunisia

## VS Performance Index

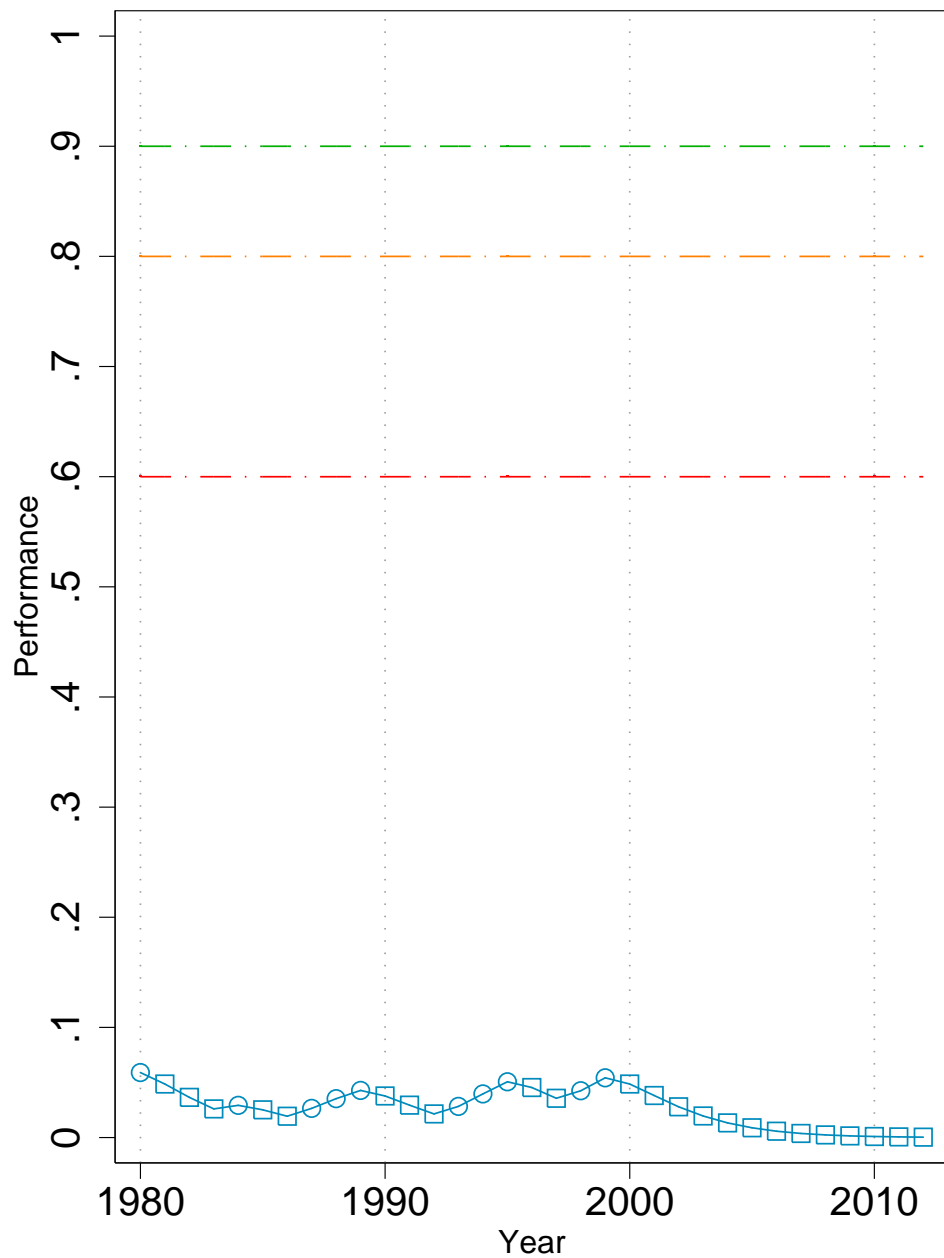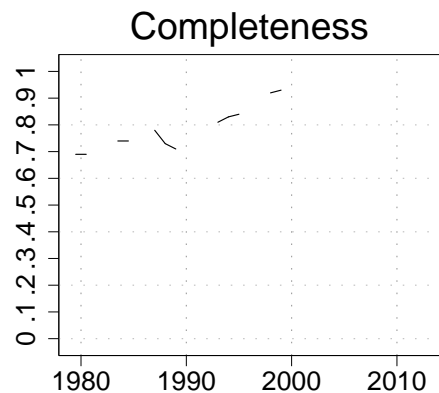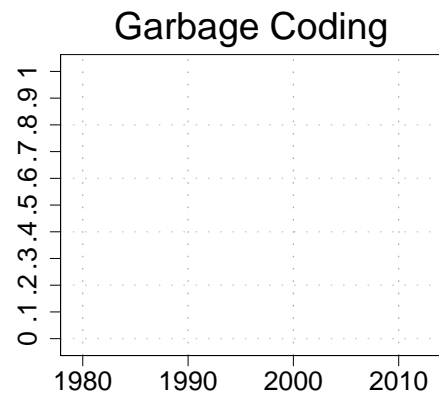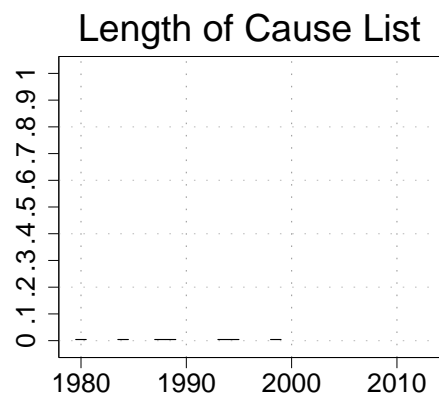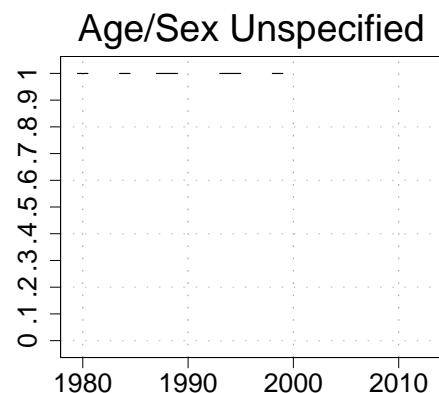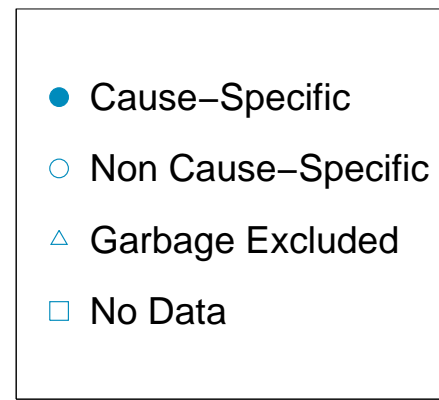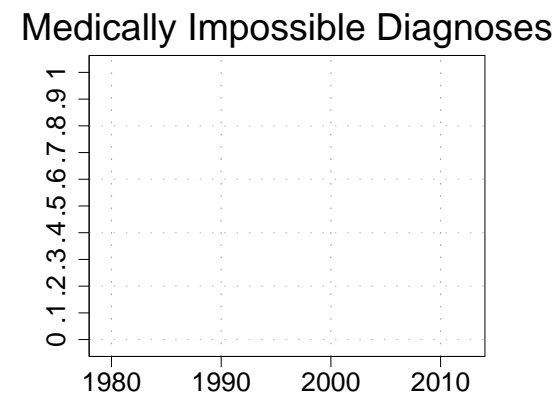

Indicators on their Original (Unweighted) Scale and Subtracted from One Where Necessary so Higher Scores are Preferable to Lower

# Turkey

## VS Performance Index

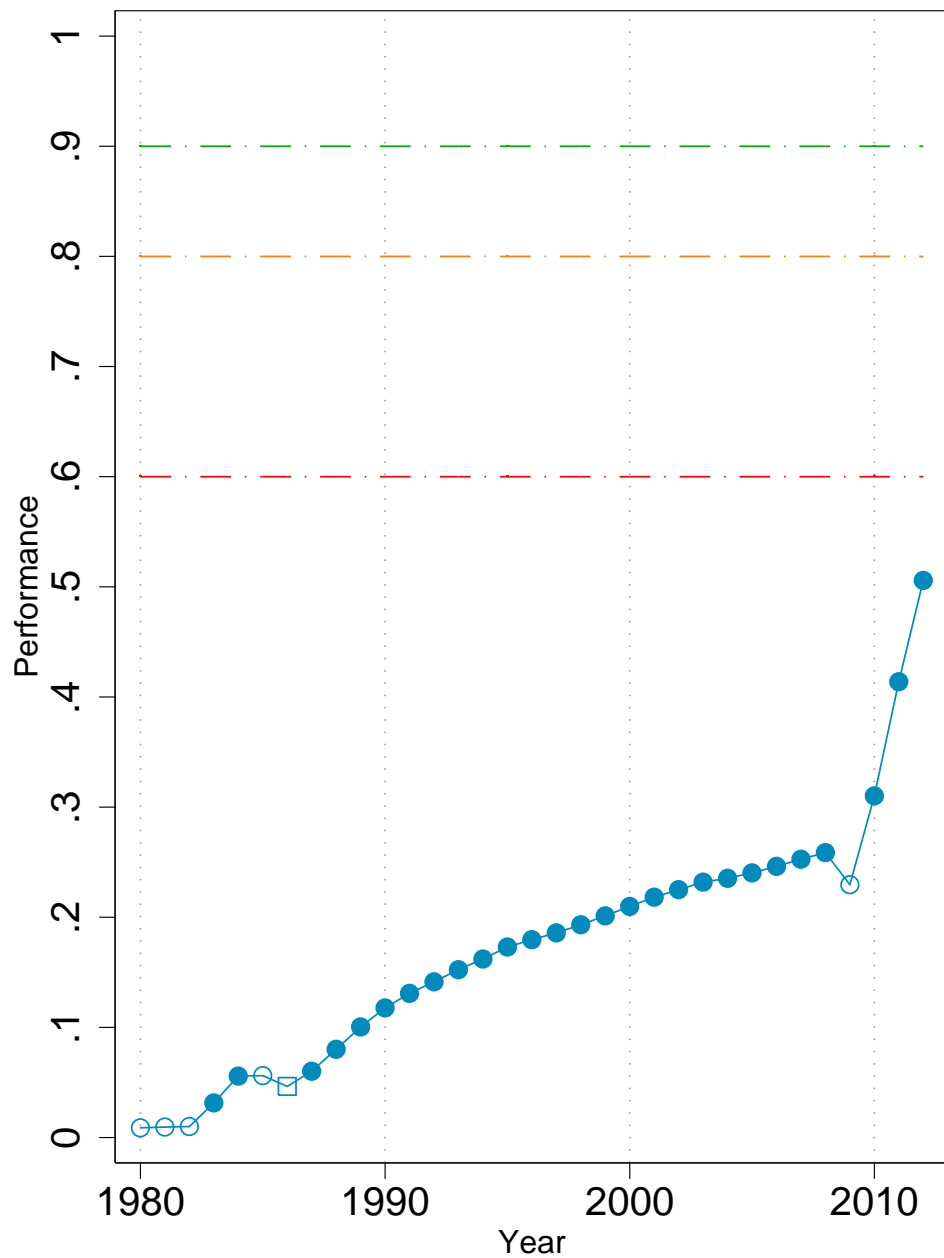

### Completeness

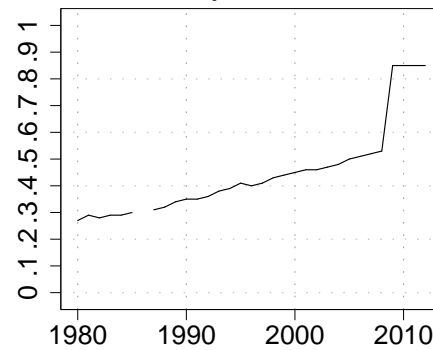

### Garbage Coding

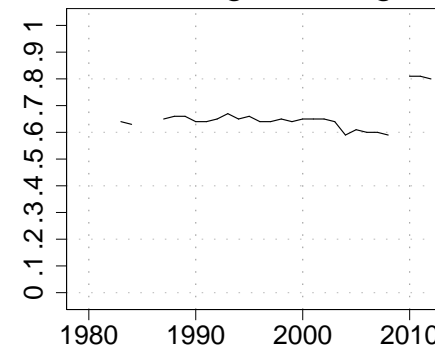

### Length of Cause List

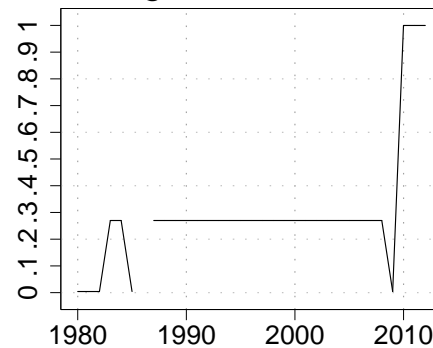

### Age/Sex Unspecified

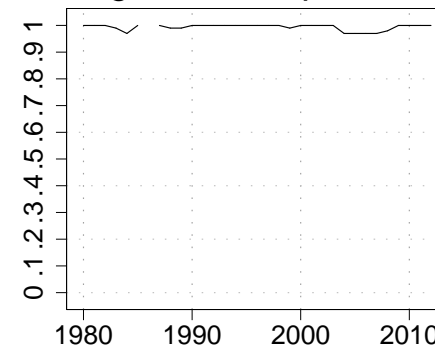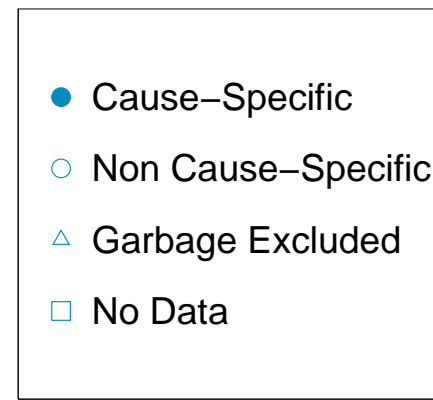

### Medically Impossible Diagnoses

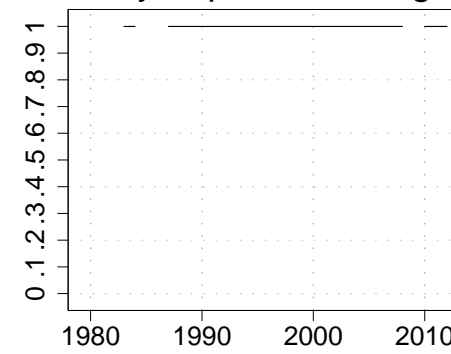

Indicators on their Original (Unweighted) Scale and Subtracted from One Where Necessary so Higher Scores are Preferable to Lower

# Turkmenistan

## VS Performance Index

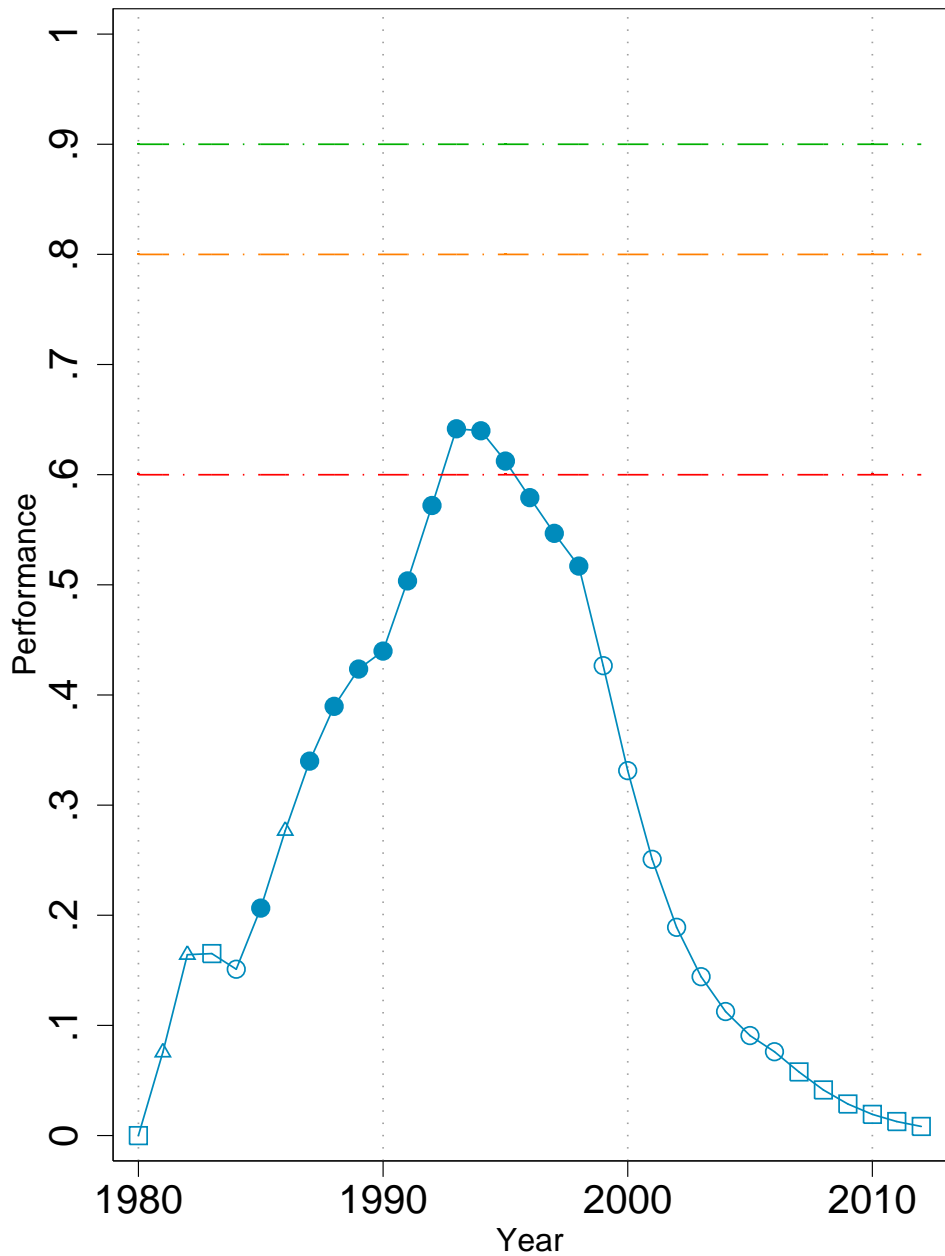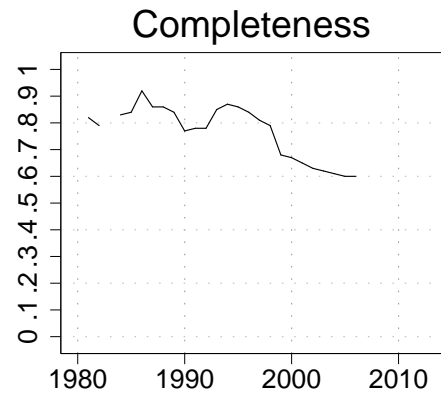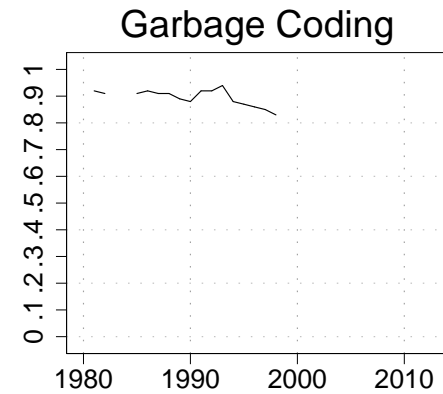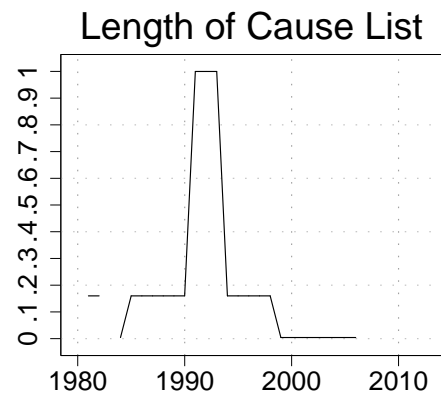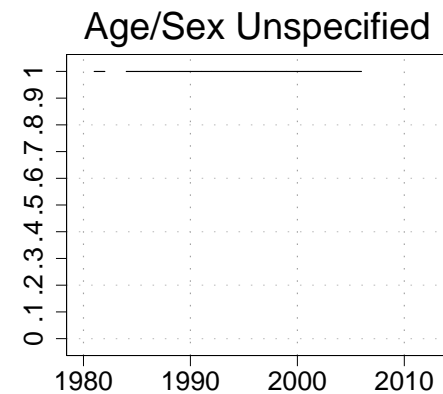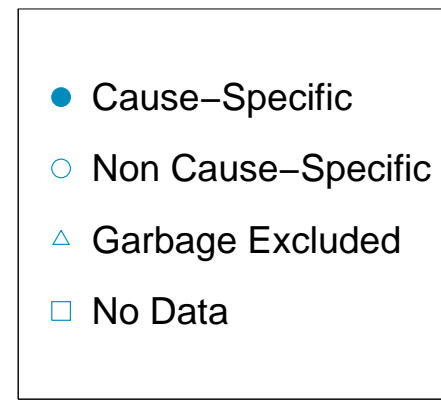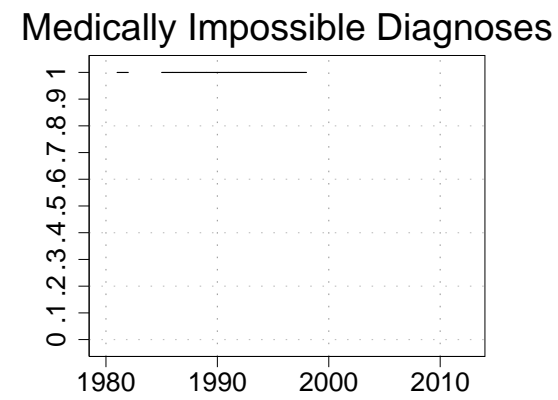

Indicators on their Original (Unweighted) Scale  
and Subtracted from One Where Necessary so Higher Scores are Preferable to Lower

# Ukraine

## VS Performance Index

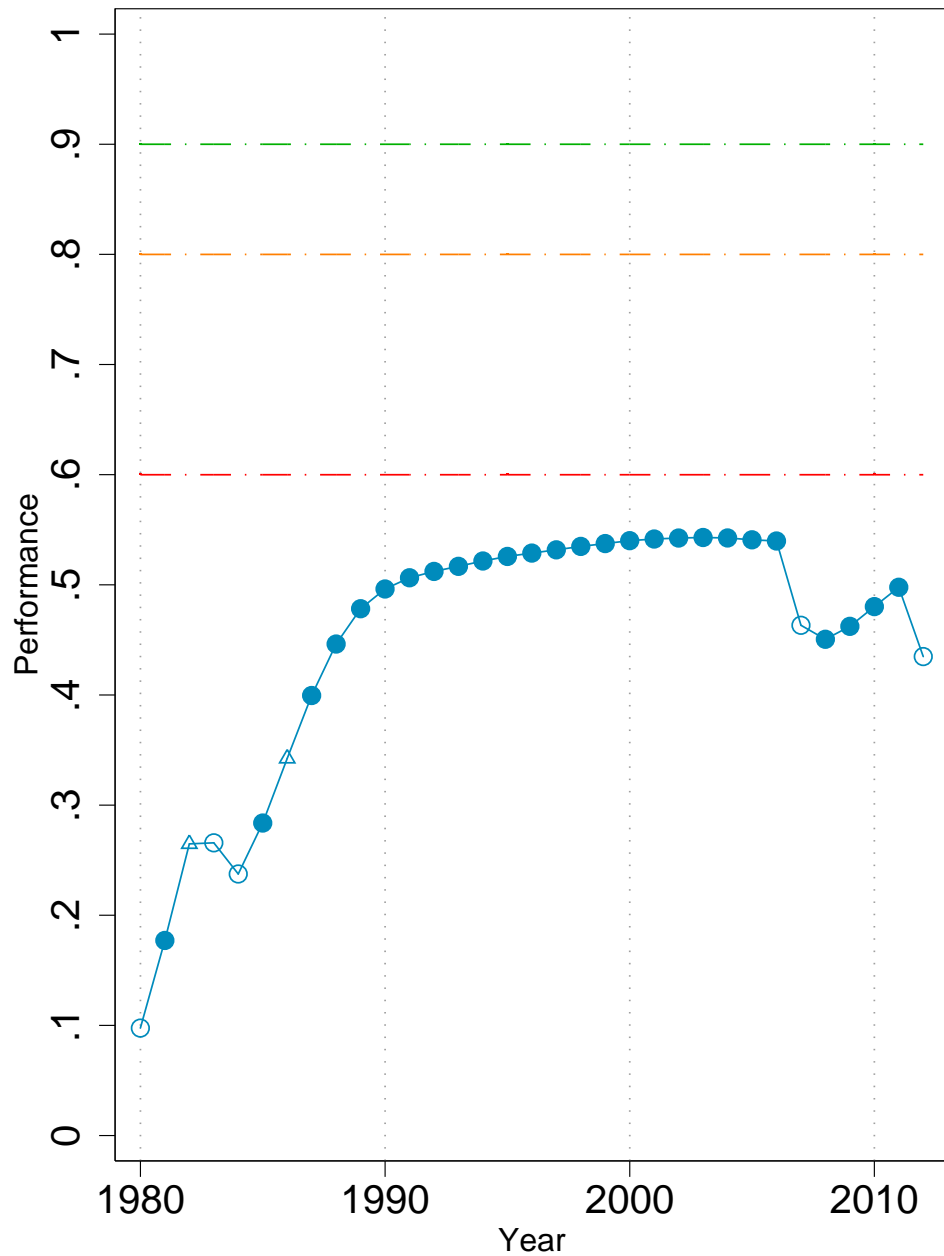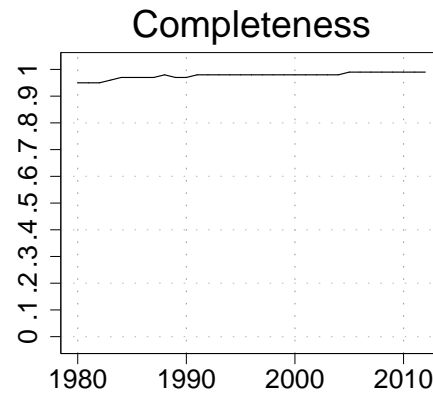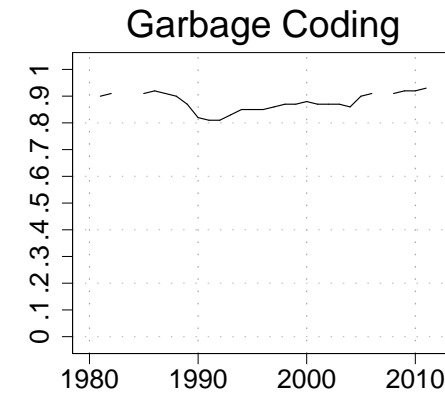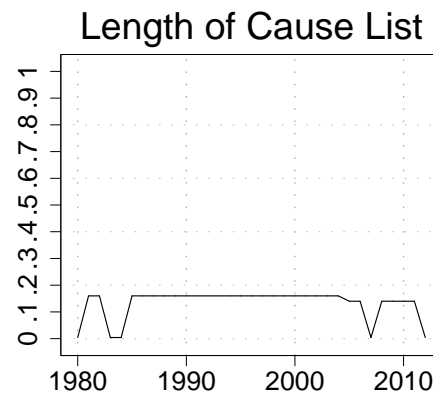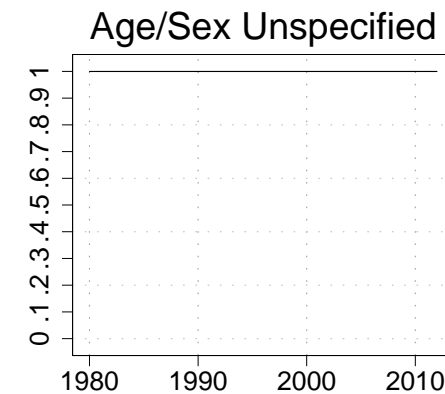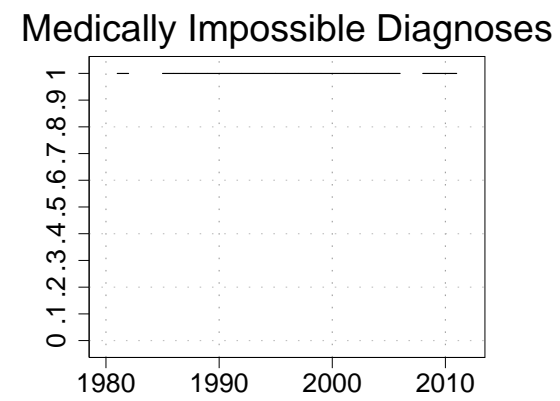

Indicators on their Original (Unweighted) Scale and Subtracted from One Where Necessary so Higher Scores are Preferable to Lower

# United Arab Emirates

## VS Performance Index

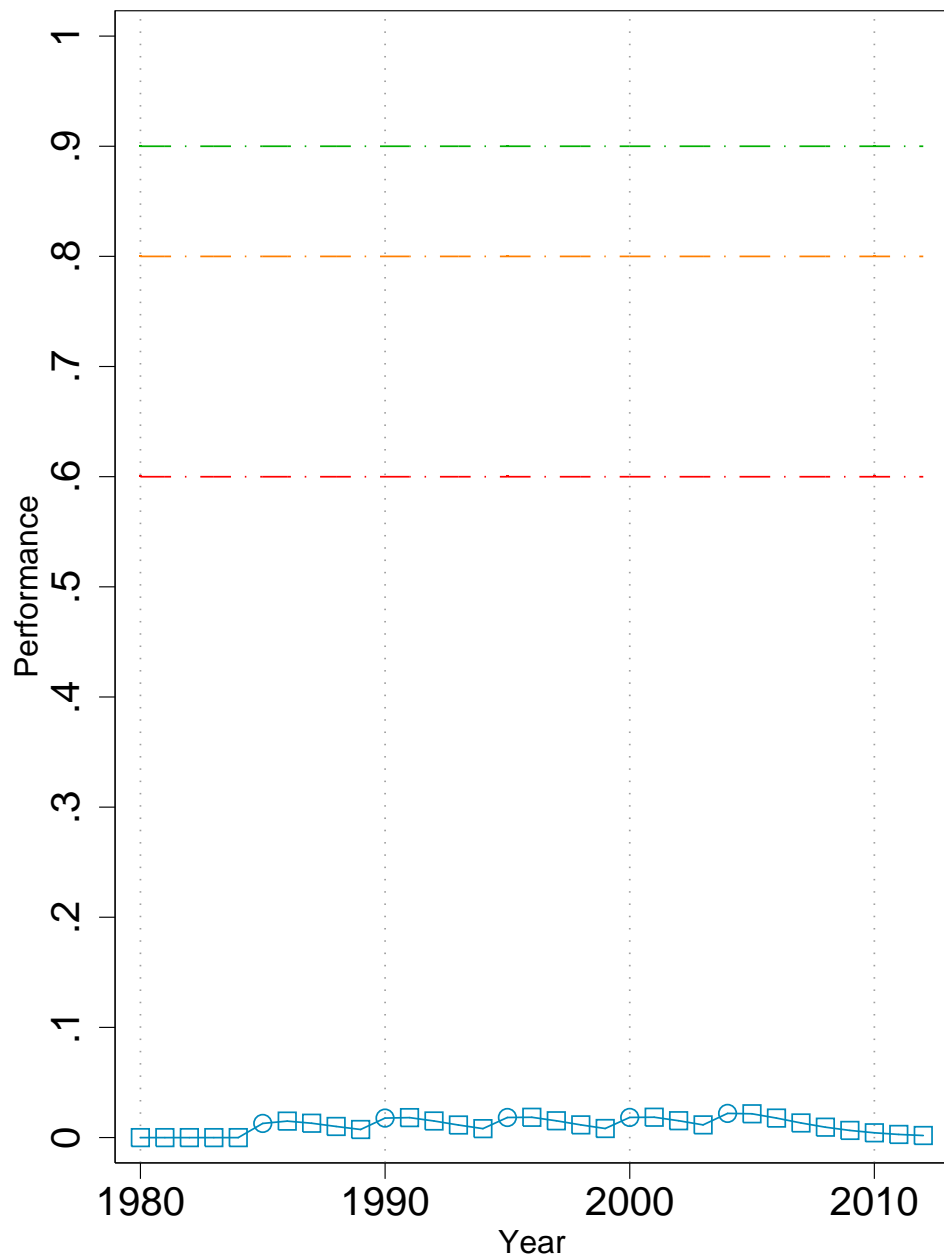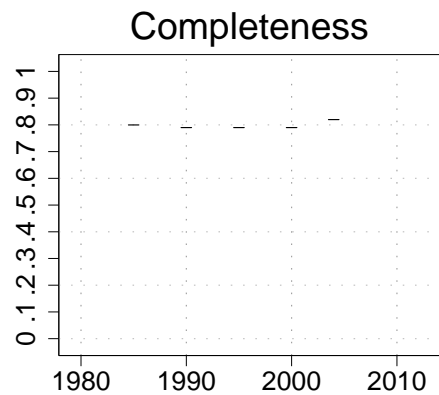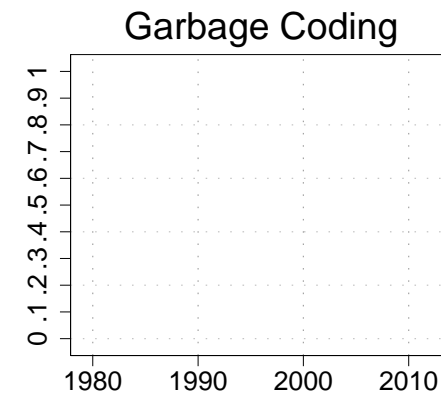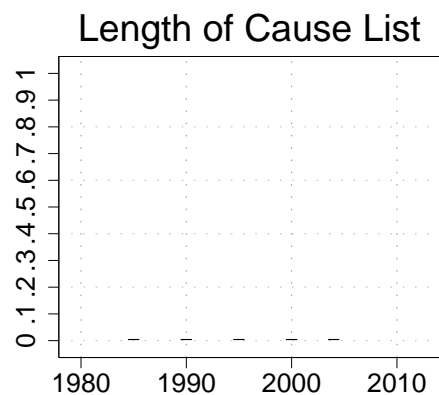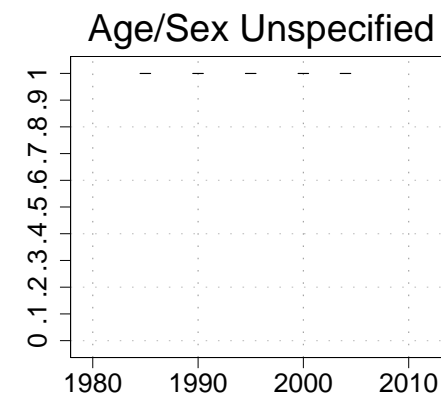

Indicators on their Original (Unweighted) Scale and Subtracted from One Where Necessary so Higher Scores are Preferable to Lower



# United Kingdom VS Performance Index

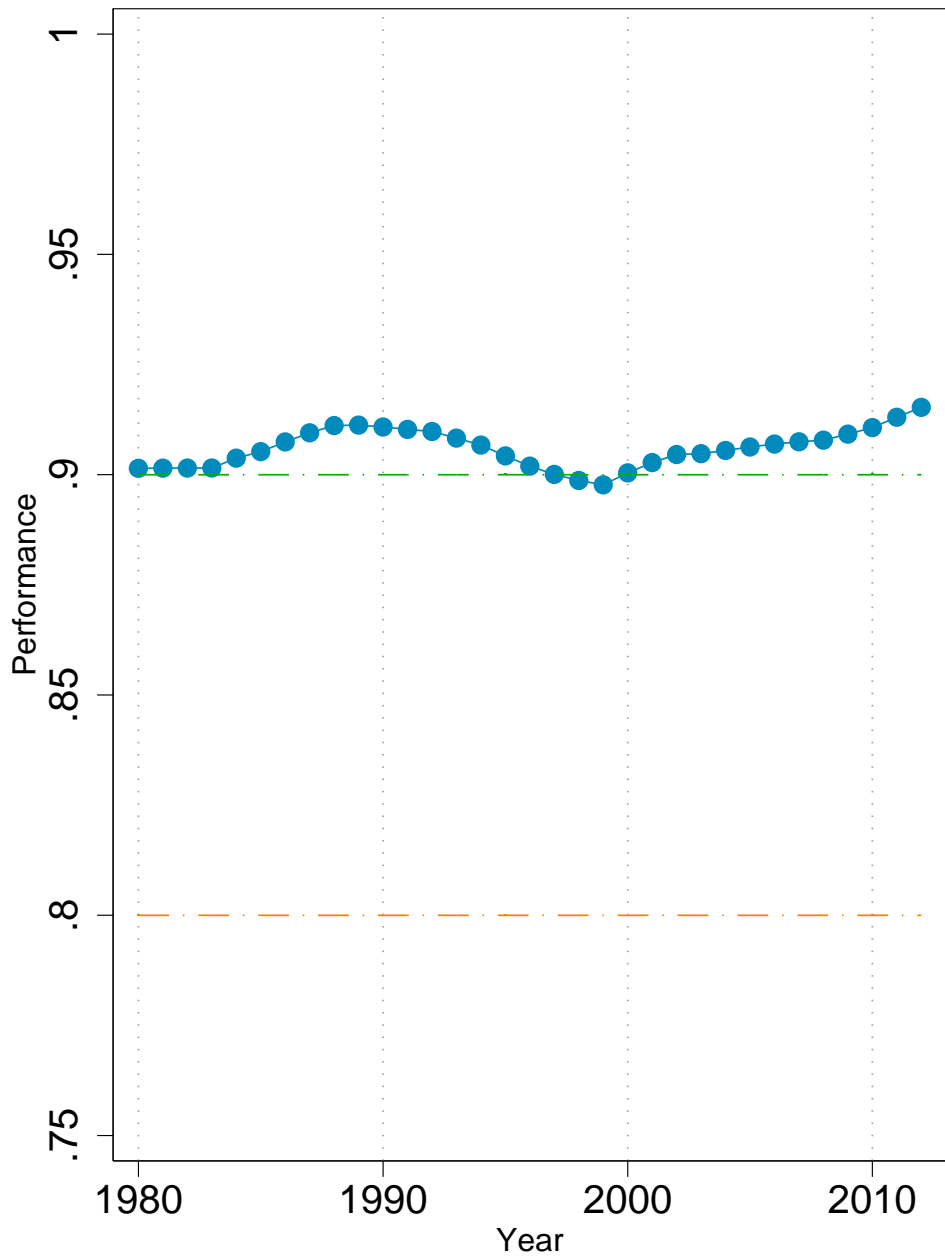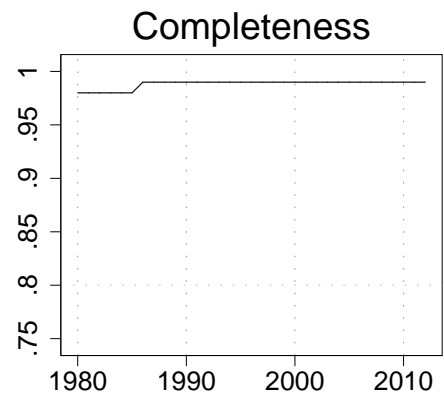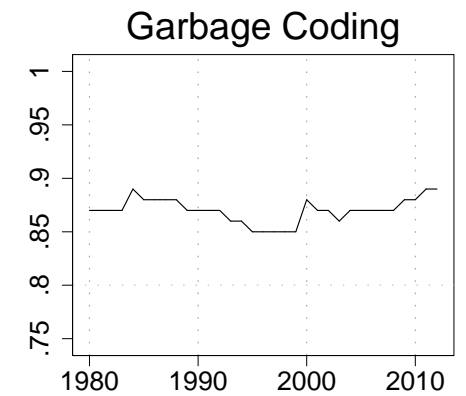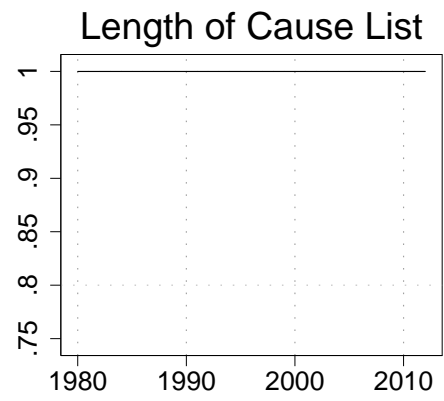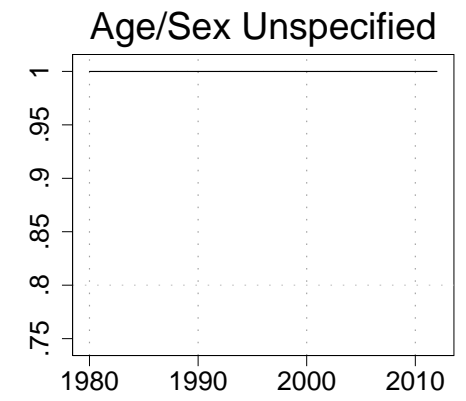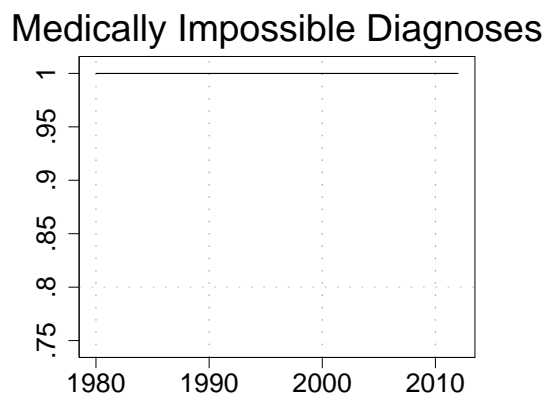

Indicators on their Original (Unweighted) Scale and Subtracted from One Where Necessary so Higher Scores are Preferable to Lower

# United States VS Performance Index

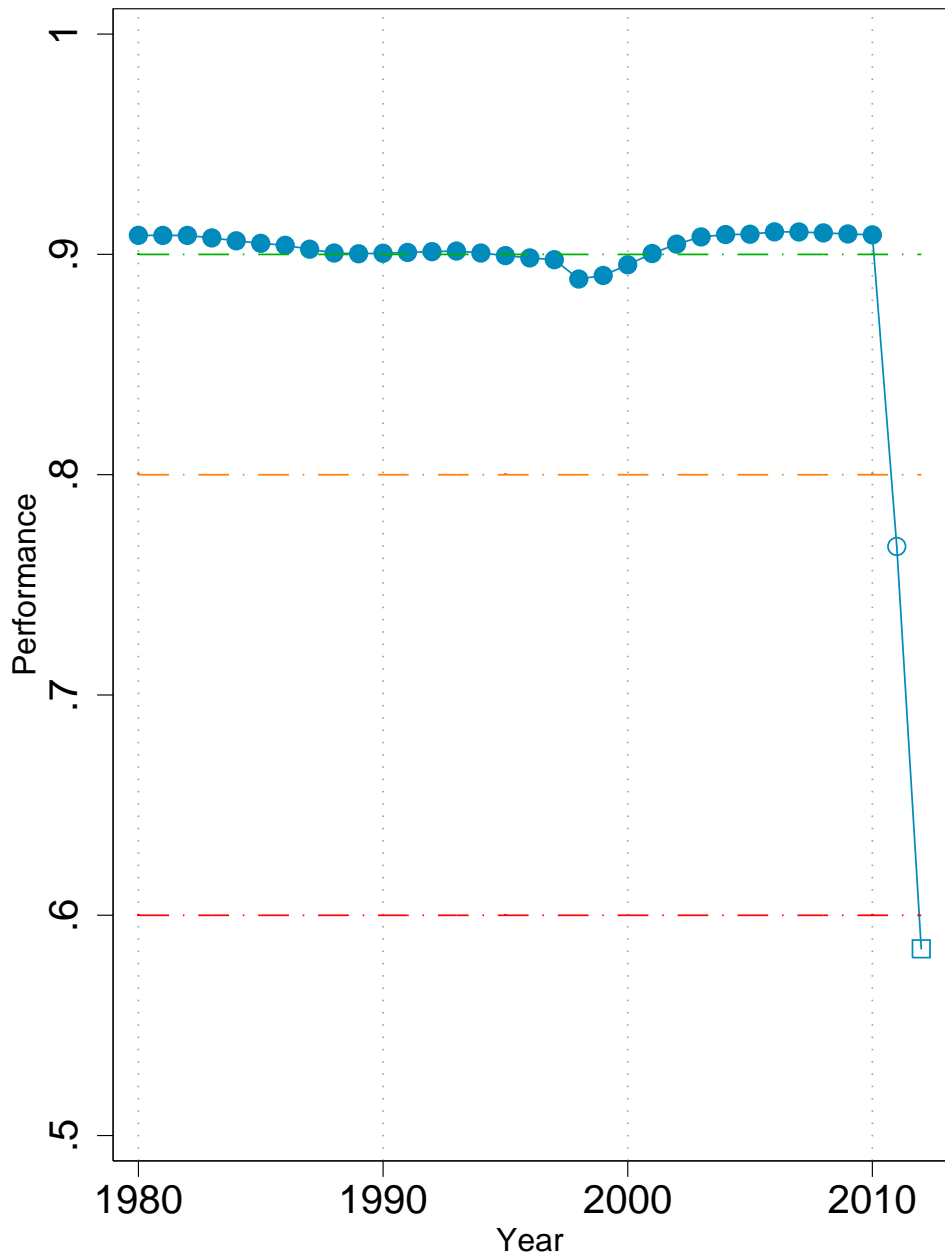

### Completeness

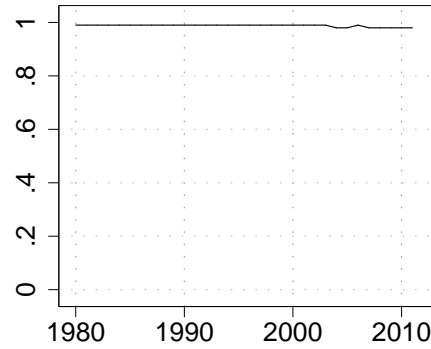

### Garbage Coding

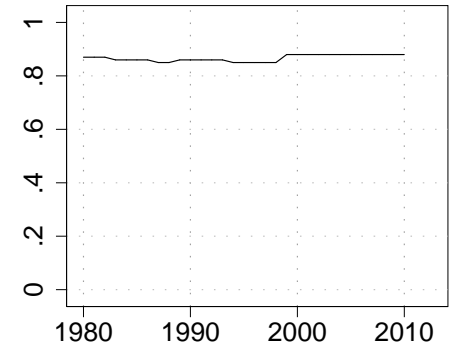

### Length of Cause List

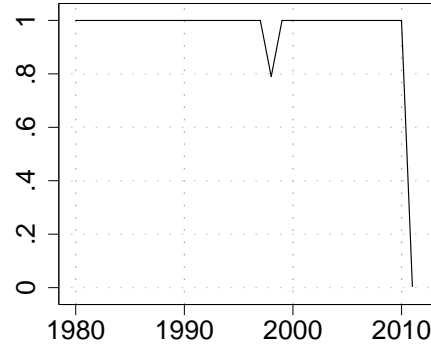

### Age/Sex Unspecified

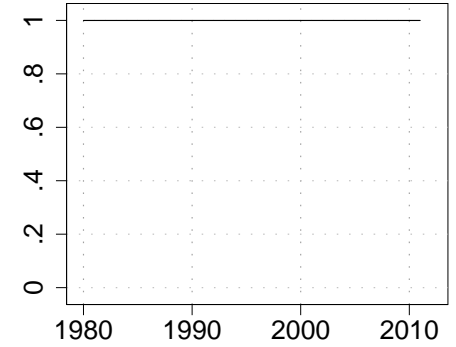

### Medically Impossible Diagnoses

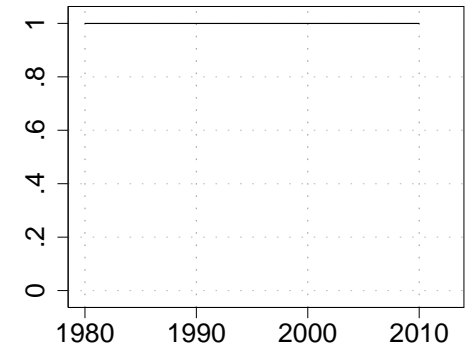

Indicators on their Original (Unweighted) Scale and Subtracted from One Where Necessary so Higher Scores are Preferable to Lower

# Uruguay

## VS Performance Index

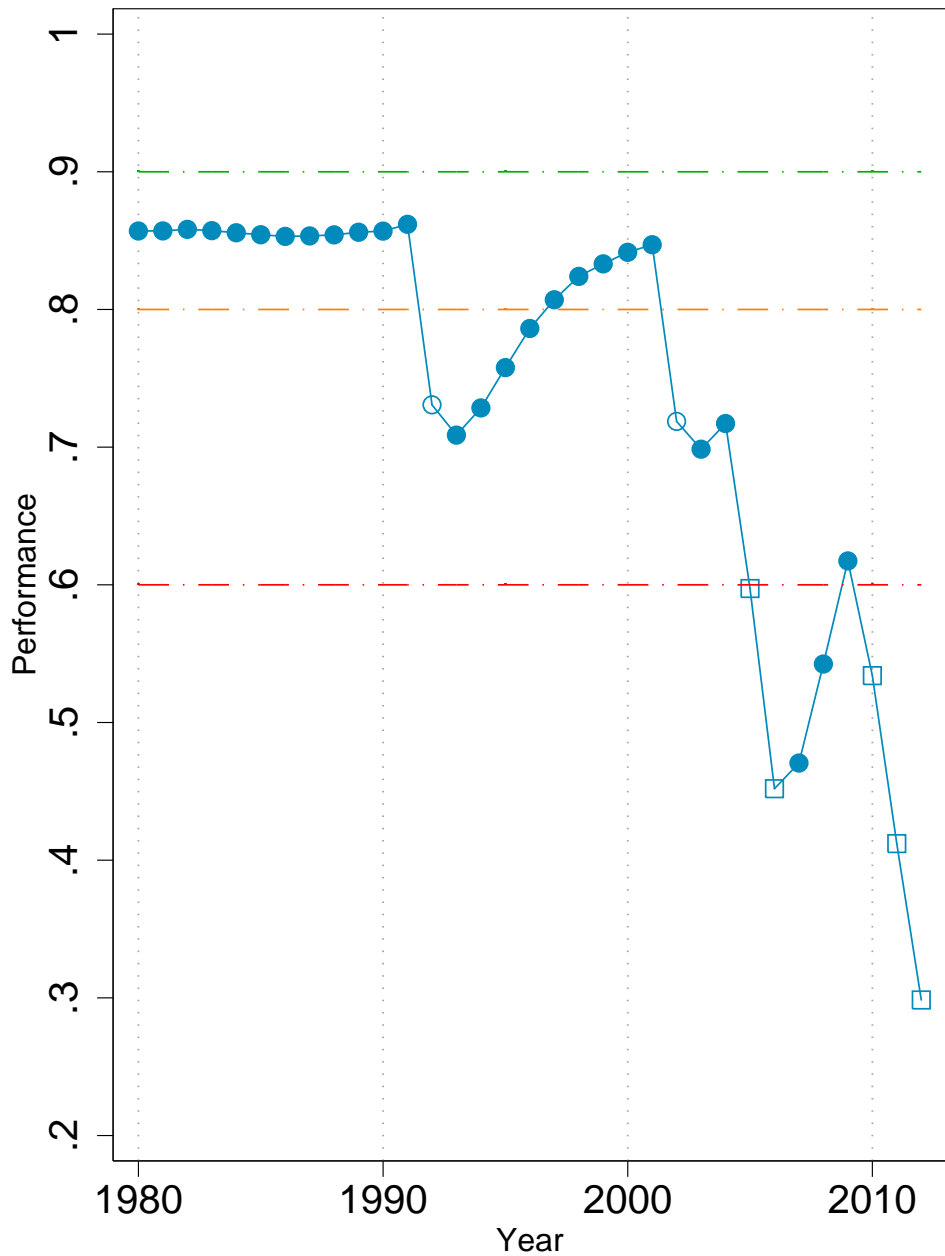

Completeness

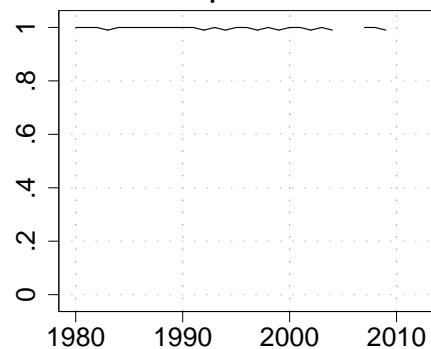

Garbage Coding

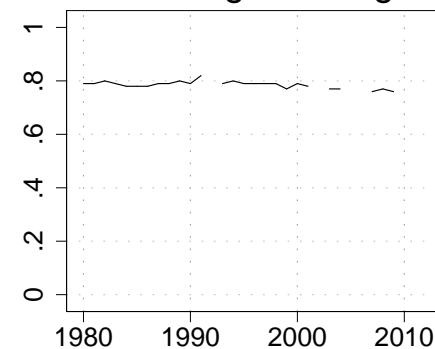

Length of Cause List

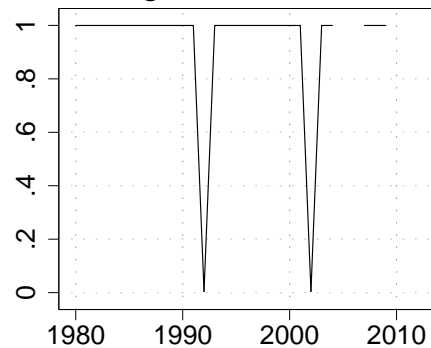

Age/Sex Unspecified

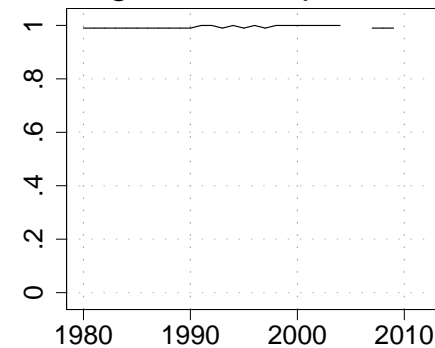

Medically Impossible Diagnoses

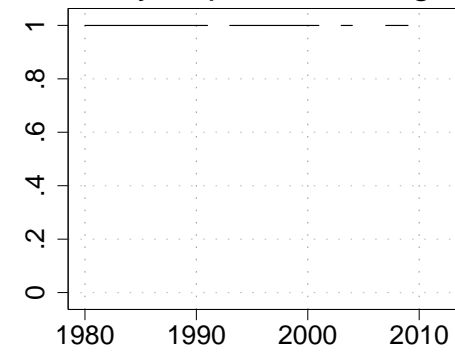

Indicators on their Original (Unweighted) Scale and Subtracted from One Where Necessary so Higher Scores are Preferable to Lower

# Uzbekistan

## VS Performance Index

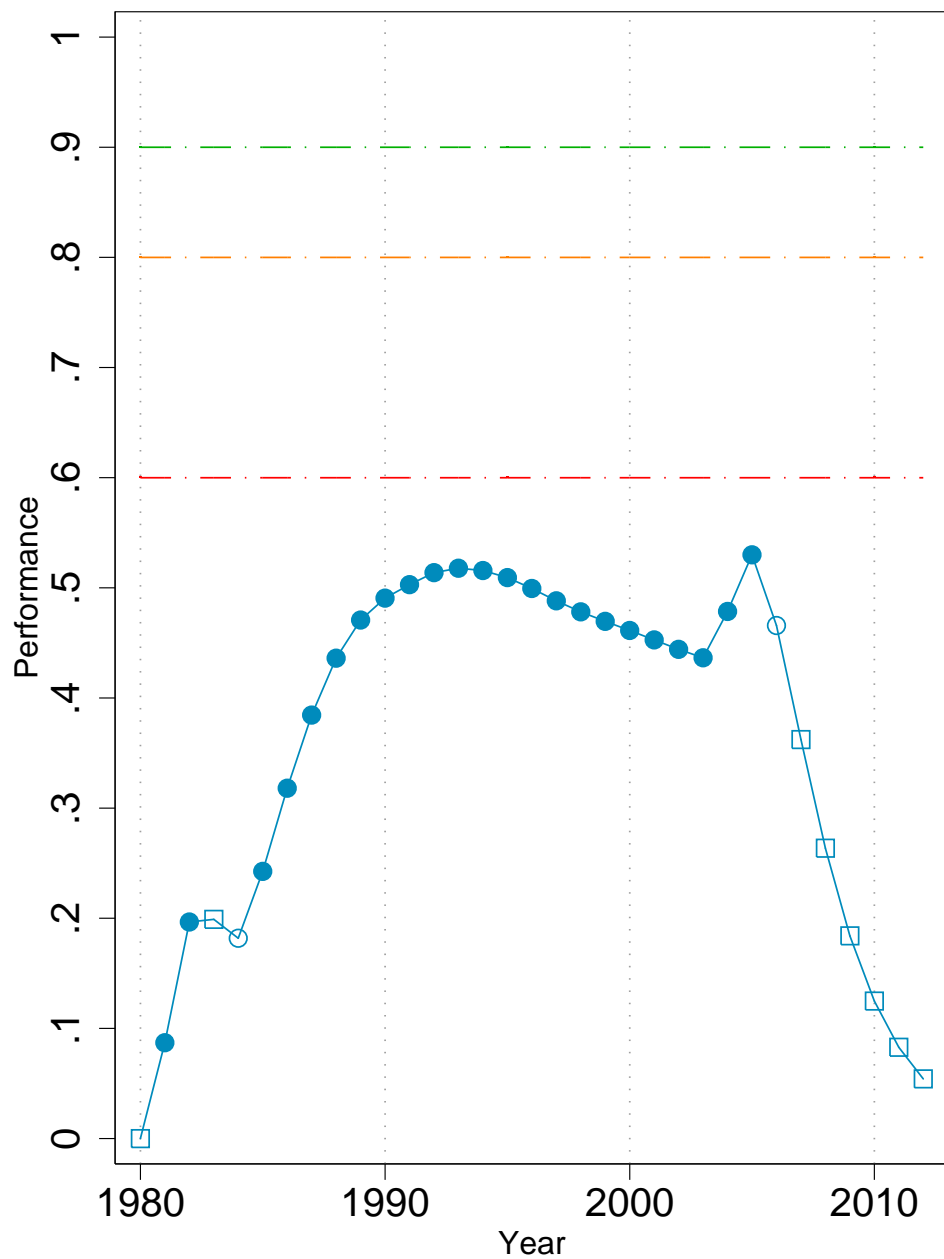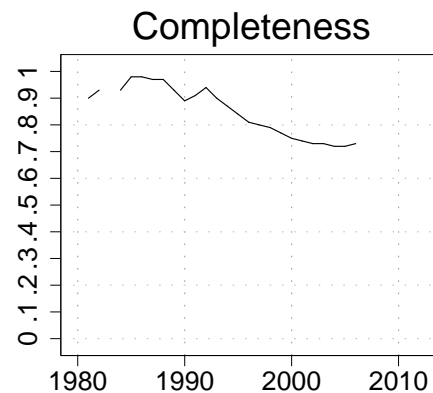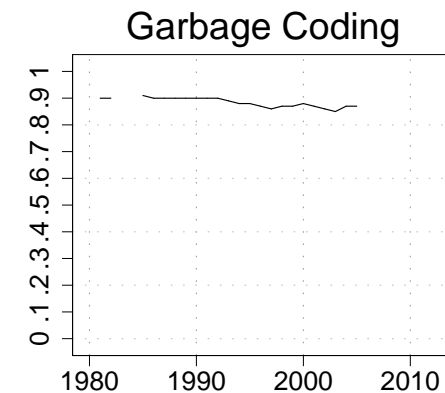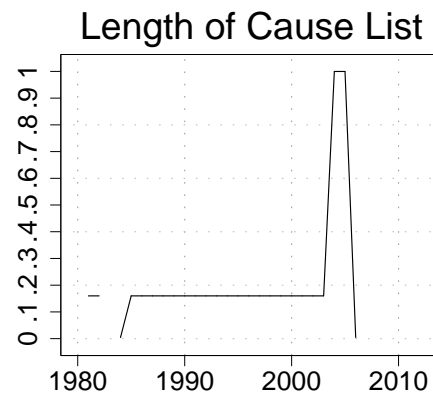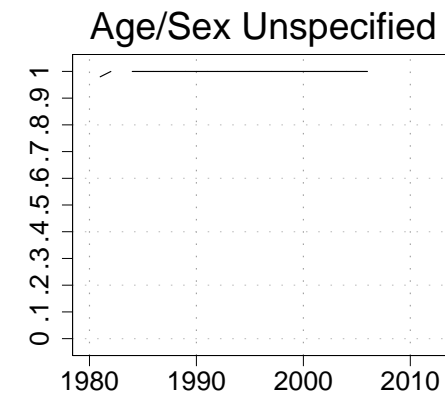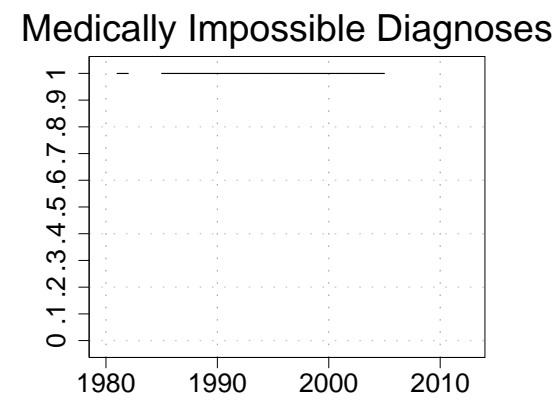

Indicators on their Original (Unweighted) Scale and Subtracted from One Where Necessary so Higher Scores are Preferable to Lower

# Venezuela

## VS Performance Index

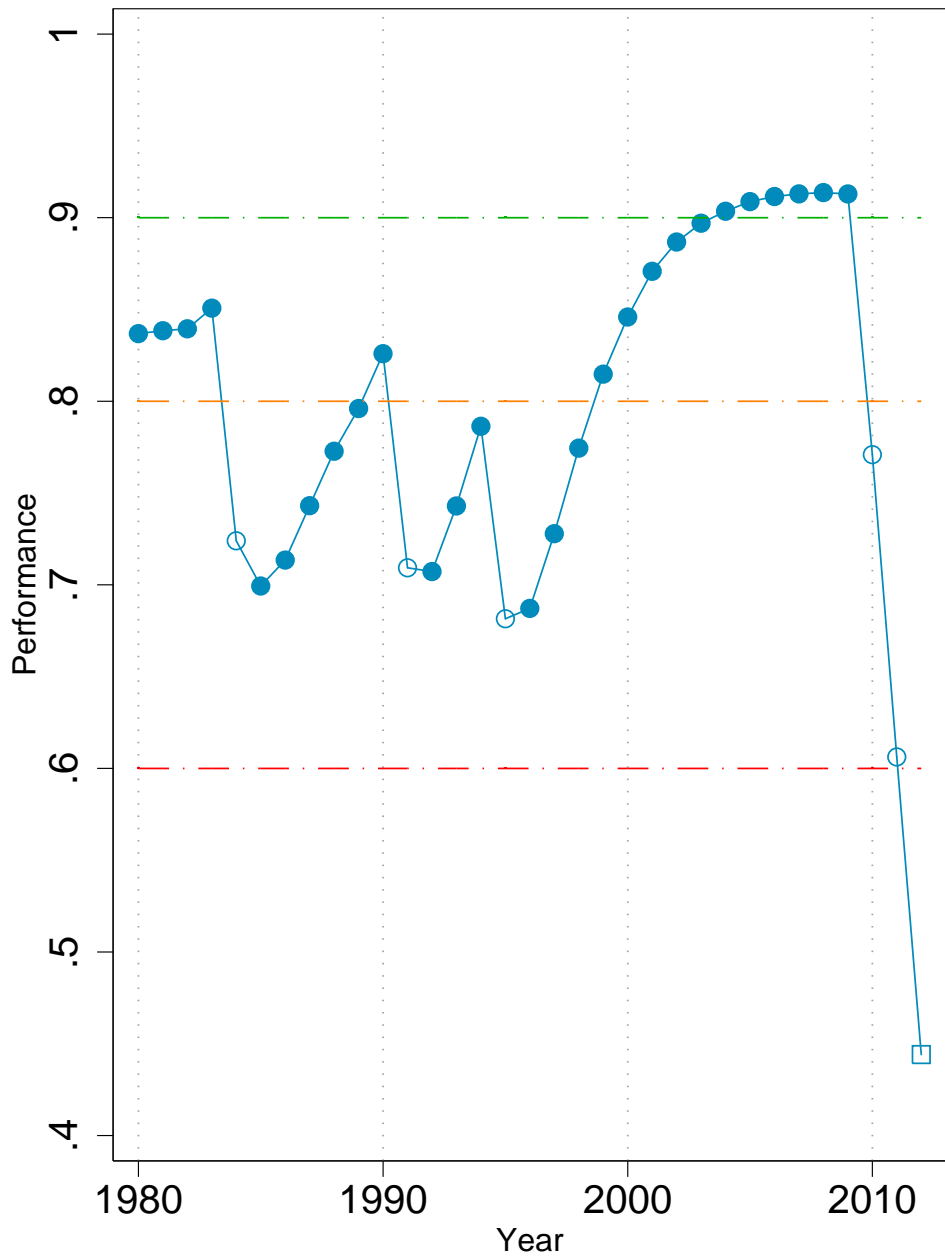

### Completeness

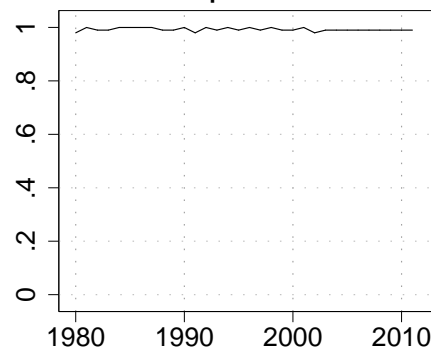

### Garbage Coding

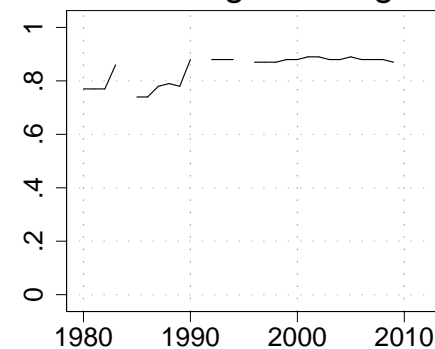

### Length of Cause List

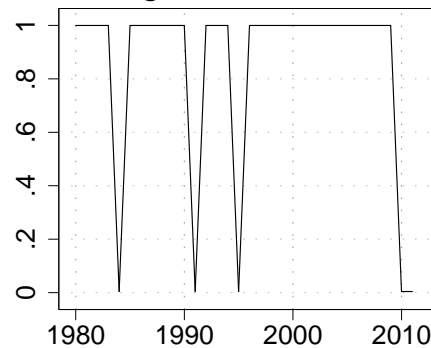

### Age/Sex Unspecified

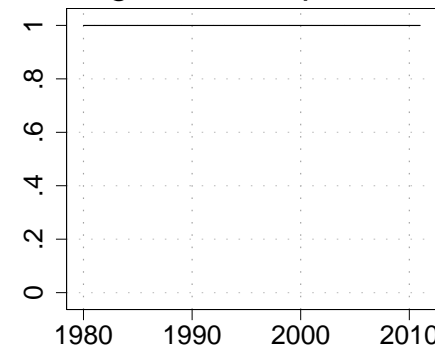

### Medically Impossible Diagnoses

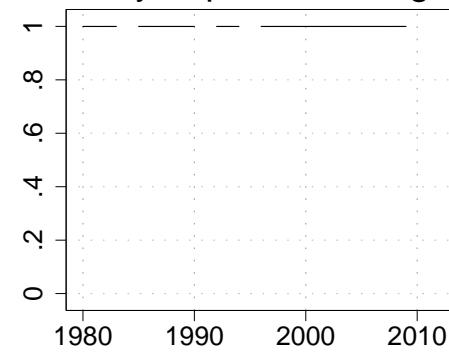

Indicators on their Original (Unweighted) Scale and Subtracted from One Where Necessary so Higher Scores are Preferable to Lower

# Zimbabwe

## VS Performance Index

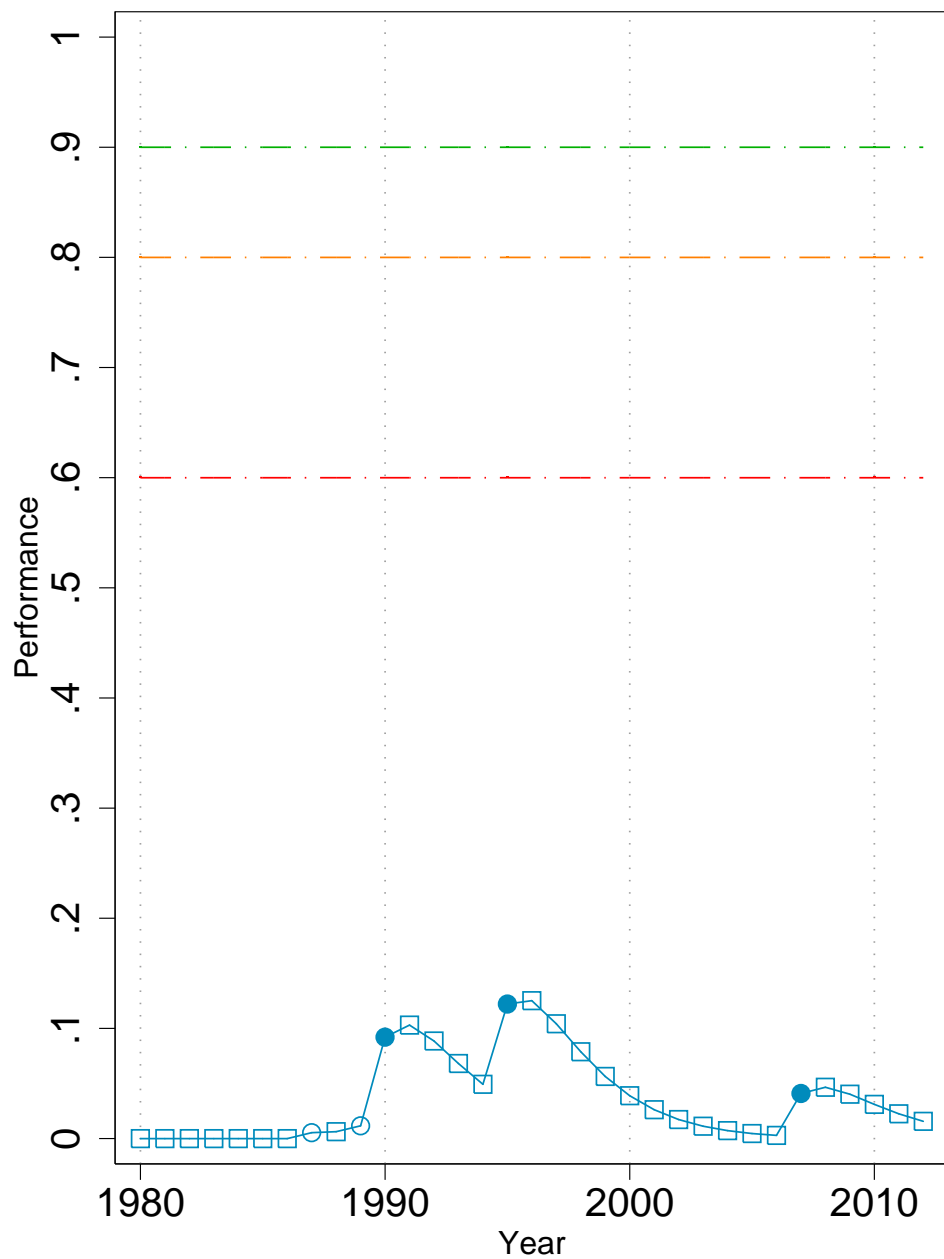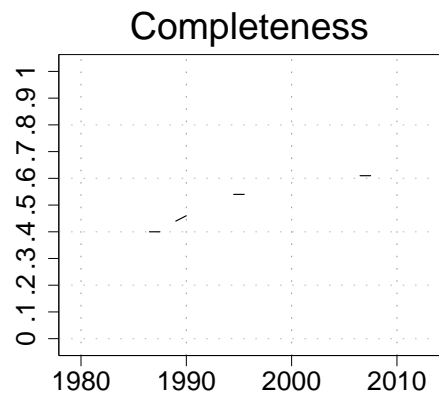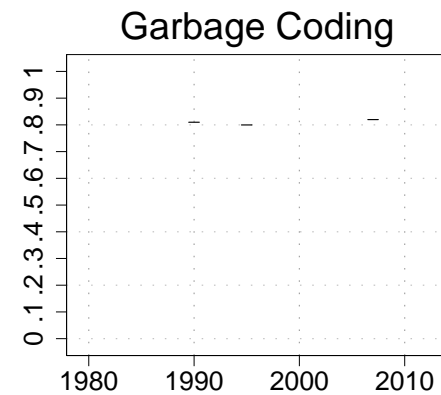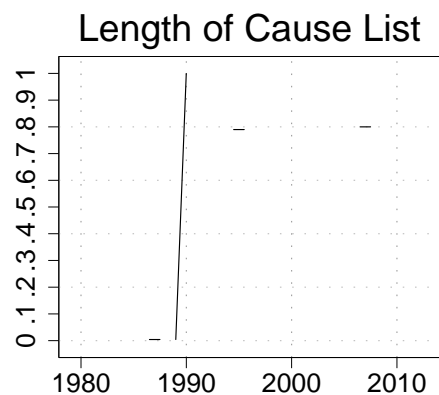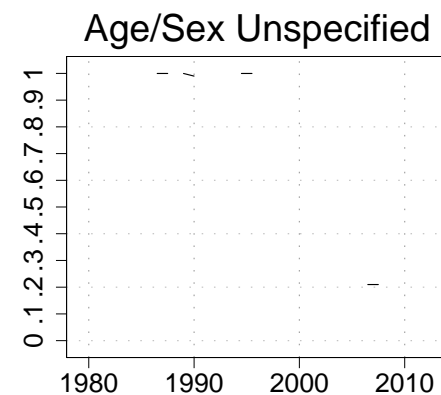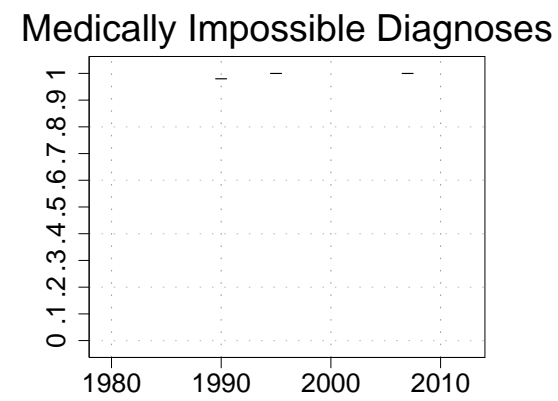

Indicators on their Original (Unweighted) Scale and Subtracted from One Where Necessary so Higher Scores are Preferable to Lower

# Switzerland

## VS Performance Index

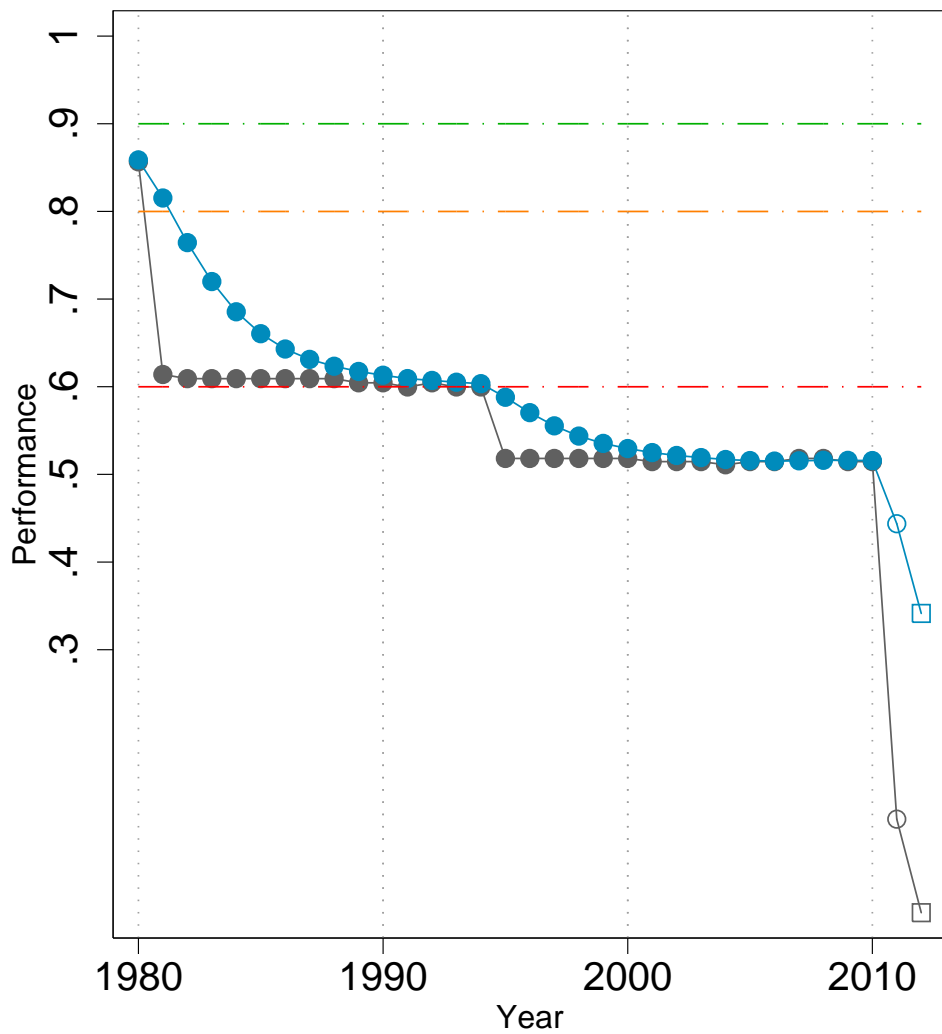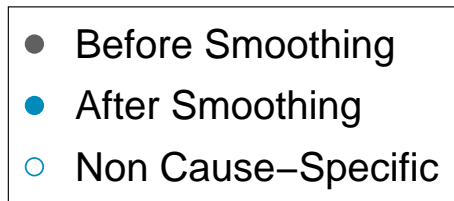

### Completeness

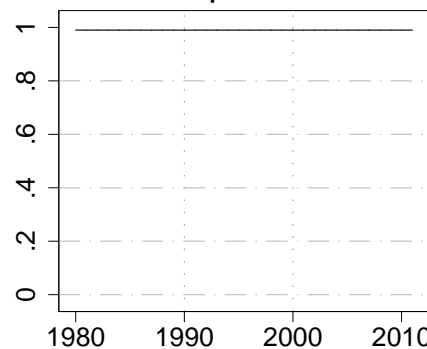

### Garbage Coding

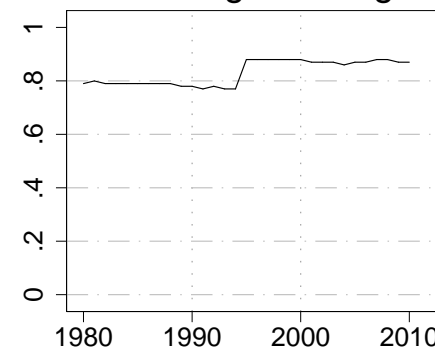

### Length of Cause List

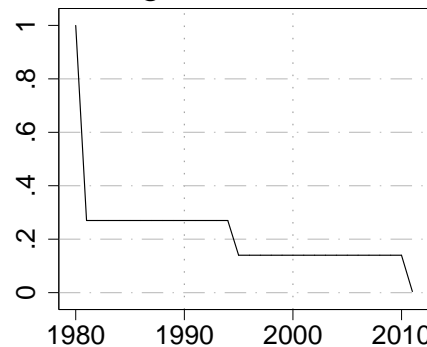

### Age/Sex Unspecified

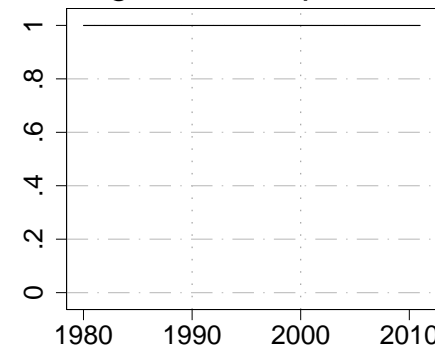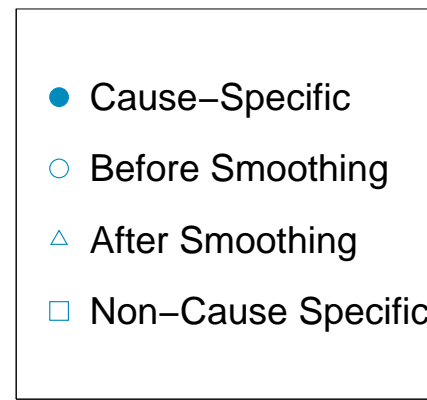

### Medically Impossible Diagnoses

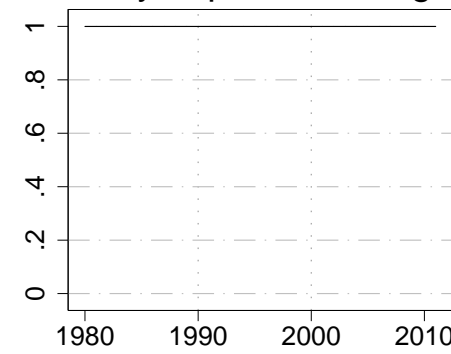

Indicators on their Original (Unweighted) Scale and Subtracted from One Where Necessary so Higher Scores are Preferable to Lower
